# Supplementary material for: A hydrogen borrowing annulation strategy for the stereocontrolled synthesis of saturated aza-heterocycles
Source: Royal Society of Chemistry journal article supplement (doi:10.1039/d0cc00903b), 2020-01-01

**Supporting Information for**  
**“A Hydrogen Borrowing Annulation Strategy for the Stereocontrolled**  
**Synthesis of Saturated Aza-Heterocycles”**

*Anna E. R. Chamberlain, Kieran J. Paterson, Roly J. Armstrong,*

*Heather C. Twin and Timothy J. Donohoe*

**Contents**

|           |                                                                   |            |
|-----------|-------------------------------------------------------------------|------------|
| <b>1.</b> | <b>General Information</b>                                        | <b>S2</b>  |
| <b>2.</b> | <b>Extended Optimization Table for Enantiospecific Annulation</b> | <b>S4</b>  |
| <b>3.</b> | <b>General Procedures</b>                                         | <b>S5</b>  |
| <b>4.</b> | <b>Experimental Procedures</b>                                    | <b>S6</b>  |
| 4.1.      | <i>Synthesis of Starting Materials</i>                            | <b>S6</b>  |
| 4.2.      | <i>Hydrogen Borrowing Annulation</i>                              | <b>S12</b> |
| 4.3.      | <i>Resubjection Experiment</i>                                    | <b>S48</b> |
| <b>5.</b> | <b>References</b>                                                 | <b>S49</b> |
| <b>6.</b> | <b>NMR spectra</b>                                                | <b>S50</b> |

## 1. General Information

All reactions were performed in flame-dried reaction vessels under an argon atmosphere, unless otherwise stated. Anhydrous solvents were obtained from MBRAUN SP-5 solvent purification system and were dried by passage through double filtration columns under nitrogen. Anhydrous benzylamine ( $\geq 99.5\%$ , purified by redistillation) was purchased from Sigma Aldrich. All other reagents were acquired from Sigma Aldrich, Fluorochem, Acros Organics, Alfa Aesar or TCI and used without further purification. Brine refers to a saturated aqueous solution of NaCl.

Reactions were monitored by TLC using Merck Silicagel 60 F<sub>254</sub> aluminium-backed silica plates (particle size 0.20 mm) and visualised by exposure to UV light ( $\lambda = 254$  nm) and/or staining and heating with phosphomolybdic acid, vanillin or potassium permanganate as appropriate. Flash column chromatography was performed using Merck Geduran® Silicagel 60 (40–63  $\mu\text{m}$ ) according to the method of Still and co-workers.<sup>1</sup> The required solvent system is specified in parentheses and where mixtures of solvents are described, the ratios are given as volume:volume. *N*-Benzyl piperidine and pyrrolidine products were purified on pre-basified silica (as noted in **General Procedure A** and **B**) which was prepared as follows; silica (400 g), pentane (250 mL), Et<sub>2</sub>O (250 mL) and triethylamine (5 mL) were combined in a 1 L beaker and stirred for 15 minutes. The solvent was allowed to evaporate overnight, and the resulting silica could be stored in a sealed bottle for a few weeks.

Nuclear magnetic resonance (NMR) spectra were recorded on 400 or 500 MHz spectrometers at ambient temperature, unless otherwise stated. <sup>1</sup>H and <sup>13</sup>C spectra were referenced to residual solvent peaks. Chemical shifts ( $\delta$ ) are recorded in parts per million (ppm) to the nearest 0.01 ppm for <sup>1</sup>H NMR or 0.1 ppm for <sup>13</sup>C and <sup>19</sup>F NMR, except where additional precision was required to distinguish two close peaks. Coupling constants (*J*) are measured in hertz (Hz) and quoted to the nearest 0.1 Hz. Peaks are assigned as singlet (s), doublet (d), triplet (t), quartet (q), pentet (p), heptet (hept), multiplet (m), broad (br.) or a combination such as doublet of doublets (dd), doublet of triplets (dt) etc. Multiplicities are based on appearance rather than interpretation. For cyclic compounds, the abbreviation 'ax' denotes the axial proton and 'eq' the equatorial proton. For diastereotopic CH<sub>2</sub> groups in acyclic molecules or in cases where it was not possible to definitively assign axial vs equatorial environments, the CH<sub>2</sub> protons are labelled 'a' and 'b'. <sup>1</sup>H NMR yields were calculated by integration with respect to an internal standard (1,1,2,2-tetrachloroethane) run with an extended relaxation delay of 25 seconds.

Chiral phase HPLC was performed on an Agilent 1260 Series HPLC unit equipped with UV-vis diode-array detector, fitted with the appropriate Daicel Chiralpak column (dimensions: 0.46 cm  $\phi$  x 25 cm)

along with the corresponding guard column (0.4 cm  $\phi$  x 1 cm). Wavelengths ( $\lambda$ ) are reported in nm, retention times ( $t_R$ ) are reported in minutes and solvent flow rates are reported in mL min<sup>-1</sup>. The Cbz-protected saturated heterocycles are extremely non-polar and we observed significant variation in their retention times from day to day. It was therefore essential to run enantiopure samples back to back with the corresponding authentic racemic sample.

Fourier-transformed infrared (FT-IR) spectra were recorded as a thin film or solid on a Bruker Tensor 27 FT-IR spectrometer equipped with a Pike Miracle Attenuated Total Reflectance sampling accessory. Absorption maxima are quoted in wavenumbers (cm<sup>-1</sup>). The abbreviation br. denotes a broad peak.

Electrospray ionisation (ESI) HRMS were recorded on a Thermo Exactive orbitrap spectrometer equipped with a Waters Equity LC system, with a flow rate of 0.2 mL/min using water:methanol:formic acid (10:89.9:0.1) as eluent. The system uses a heated electrospray ionisation (HESI-II) probe for ESI<sup>+</sup> and has a resolution of 50,000 FWHM under conditions for maximum sensitivity, with an accuracy of better than 5 ppm for 24 h following external calibration on the day of analysis. The mass reported is that containing the most abundant isotopes, with each value rounded to 4 decimal places and within 5 ppm of the calculated mass.

Melting point analysis was carried out using a Lecia VMTG heated-stage microscope equipped with a Testo 720 thermometer.

Optical rotations were recorded on a Schmidt Haensch Unipol L2000 polarimeter in a cell with a path length of 1 dm (using the sodium D line, 589 nm). Concentrations are reported in g/100 mL. Temperatures are reported in °C.

## 2. Extended Optimization Table for Enantiospecific Annulation<sup>a</sup>

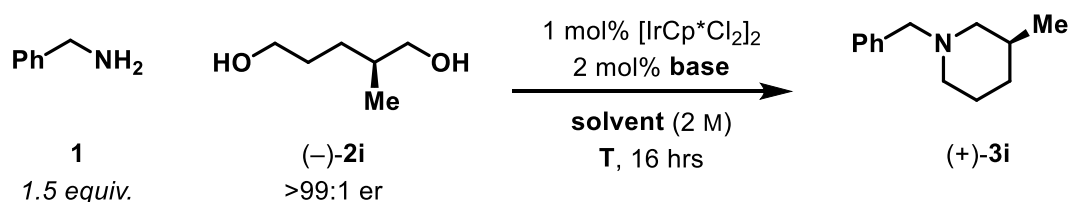

| Entry | Base                            | Solvent           | T / °C | Yield / % <sup>b</sup> | er <sup>c</sup> |
|-------|---------------------------------|-------------------|--------|------------------------|-----------------|
| 1     | -                               | Toluene           | 110    | (54)                   | 57:43           |
| 2     | NaHCO <sub>3</sub>              | Toluene           | 110    | 92(80)                 | 71:29           |
| 3     | KHCO <sub>3</sub>               | Toluene           | 110    | 85                     | 73:27           |
| 4     | CsHCO <sub>3</sub>              | Toluene           | 110    | 98                     | 74:26           |
| 5     | NaOAc                           | Toluene           | 110    | 90(86)                 | 62:38           |
| 6     | KOAc                            | Toluene           | 110    | 95                     | 62:38           |
| 7     | Na <sub>2</sub> CO <sub>3</sub> | Toluene           | 110    | 94                     | 67:33           |
| 8     | K <sub>2</sub> CO <sub>3</sub>  | Toluene           | 110    | 61                     | 54:46           |
| 9     | Cs <sub>2</sub> CO <sub>3</sub> | Toluene           | 110    | 21                     | 78:22           |
| 10    | NaOH                            | Toluene           | 110    | 94                     | 76:24           |
| 11    | KOH                             | Toluene           | 110    | 92                     | 71:29           |
| 12    | CsOH.xH <sub>2</sub> O          | Toluene           | 110    | n.r.                   | -               |
| 13    | <sup>t</sup> BuOK               | Toluene           | 110    | 88                     | 69:31           |
| 14    | <sup>t</sup> BuOK (5 mol%)      | Toluene           | 110    | n.r.                   | -               |
| 15    | <sup>t</sup> BuOK (10 mol%)     | Toluene           | 110    | n.r.                   | -               |
| 16    | CsHCO <sub>3</sub>              | Heptane           | 110    | 82                     | 76:24           |
| 17    | CsHCO <sub>3</sub>              | <sup>t</sup> BuOH | 110    | 84                     | 76:24           |
| 18    | CsHCO <sub>3</sub>              | TFE               | 110    | 69                     | 56:44           |
| 19    | CsHCO <sub>3</sub>              | 1,4-dioxane       | 110    | 85                     | 79:21           |
| 20    | CsHCO <sub>3</sub>              | CPME              | 110    | 81                     | 80:20           |
| 21    | CsHCO <sub>3</sub>              | -                 | 110    | 93                     | 82:18           |
| 22    | CsHCO <sub>3</sub>              | Water             | 110    | 79                     | 84:16           |
| 23    | -                               | Water             | 110    | 79                     | 83:17           |
| 24    | -                               | Brine             | 110    | 81                     | 65:35           |
| 25    | CsHCO <sub>3</sub>              | 1:1 Water:CPME    | 110    | 95                     | 81:19           |
| 26    | -                               | Water             | 65     | 11                     | 80:20           |
| 27    | -                               | Water             | 70     | 41                     | 85:15           |
| 28    | -                               | Water             | 75     | 61                     | 88:12           |
| 29    | -                               | Water             | 80     | 69(72)                 | 90:10           |
| 30    | -                               | Water             | 90     | 78                     | 86:14           |
| 31    | -                               | Water             | 100    | 82                     | 85:15           |

(a) Reaction conditions: diol (-)-2i (1 equiv), benzylamine (1.5 equiv), [Cp\*IrCl<sub>2</sub>]<sub>2</sub> (1 mol%), base (2 mol%), solvent (2 M), 65-110 °C, 16 h. (b) Yields determined by <sup>1</sup>H NMR analysis with 1,1,2,2-tetrachloroethane as an internal standard. Yields in parentheses refer to isolated material after column chromatography. (c) Enantiomeric purity determined after conversion to the corresponding Cbz-protected amine by HPLC using a chiral stationary phase (see Experimental Procedures for details).

### 3. General Procedures

#### 3.1 General procedure A: Hydrogen borrowing alkylation of amines with diols in toluene

To a 2-5 mL Biotage<sup>®</sup> microwave vial equipped with a stirrer bar was added the appropriate alcohol substrate (1.0 equiv.), [IrCp\*Cl<sub>2</sub>]<sub>2</sub> (1.0 mol%) and NaHCO<sub>3</sub> (2.0 mol%). The vial was sealed with a microwave vial crimp cap (containing a Reseal<sup>®</sup> septum), evacuated under vacuum and refilled with argon three times. Anhydrous toluene (2 M) was added *via* syringe, followed by the appropriate amine (1.5 equiv.). The vial was sealed with Parafilm<sup>®</sup>, placed in a preheated oil bath and stirred at 110 °C for 16 hours. The reaction mixture was cooled to room temperature and concentrated under a flow of nitrogen. Purification by column chromatography (SiO<sub>2</sub> was basified with Et<sub>3</sub>N prior to use, see General Information for details) afforded the piperidine product.

#### 3.2 General procedure B: Hydrogen borrowing alkylation of amines with diols in water

To a 2-5 mL Biotage<sup>®</sup> microwave vial equipped with a stirrer bar was added the appropriate alcohol substrate (1.0 equiv.) and [IrCp\*Cl<sub>2</sub>]<sub>2</sub> (1.0 mol%). The vial was sealed with a microwave vial crimp cap (containing a Reseal<sup>®</sup> septum), evacuated under vacuum and refilled with argon three times. Deionised water (2 M) was added *via* syringe, followed by the appropriate amine (1.5 equiv.). The vial was sealed with Parafilm<sup>®</sup>, placed in a preheated oil bath and stirred at the appropriate temperature for 16 hours. The reaction mixture was cooled to room temperature and extracted with CH<sub>2</sub>Cl<sub>2</sub> (3 × 10 mL). The organic phase was dried over MgSO<sub>4</sub>, filtered and concentrated *in vacuo*. Purification by column chromatography (SiO<sub>2</sub> was basified with Et<sub>3</sub>N prior to use, see General Information for details) afforded the title compound.

#### 3.3 General procedure C: Carboxybenzyl (Cbz) protection for HPLC analysis

To a 2-5 mL Biotage<sup>®</sup> microwave vial equipped with a stirrer bar was added the appropriate *N*-benzyl substrate (1.0 equiv.). Benzyl chloroformate (3 M in toluene, 6.0 equiv.) was added slowly *via* syringe. The vial was sealed with a microwave vial crimp cap (containing a Reseal<sup>®</sup> septum) and equipped with a balloon (caution: gas evolution!). The reaction mixture was stirred at 80 °C for 2 hours. The reaction mixture was cooled to room temperature and transferred directly onto a silica column. Purification by column chromatography (SiO<sub>2</sub>) afforded the title compound.

## 4. Experimental Procedures

### 4.1 Synthesis of Starting Materials

#### 2-Benzylpentane-1,5-diol, *rac*-2k

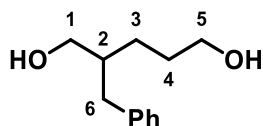

LiAlH<sub>4</sub> (1.20 g, 38.0 mmol) was suspended in anhydrous THF (150mL) at 0 °C and a solution of 3-benzyltetrahydro-2H-pyran-2-one<sup>2</sup> (2.00 g, 10.5 mmol) in anhydrous THF (25 mL) added dropwise. The reaction mixture was warmed to room temperature and stirred for 1 hour. The reaction was cooled to 0 °C, diluted with a further portion of THF (100 mL) and quenched with dropwise addition of water (1.2 mL) followed by 15% aq. NaOH (1.2 mL) and water (3.6 mL). The mixture was warmed to room temperature and stirred for 10 minutes after which MgSO<sub>4</sub> was added, and the mixture was stirred for a further 30 minutes at room temperature. The mixture was filtered through Celite® eluting with Et<sub>2</sub>O and concentrated *in vacuo*. Purification by column chromatography (CH<sub>2</sub>Cl<sub>2</sub>:MeOH 95:5) afforded diol *rac*-2k as a viscous, colourless oil (1.74 g, 85%).

<sup>1</sup>H NMR (500 MHz, CDCl<sub>3</sub>) δ = 7.30-7.26 (2H, m, ArH), 7.21-7.17 (3H, m, ArH), 3.66-3.55 (3H, m, CH<sub>2</sub>-1<sub>a</sub> and CH<sub>2</sub>-5), 3.50 (1H, dt, *J* = 10.7, 5.3 Hz, CH<sub>2</sub>-1<sub>b</sub>), 2.67-2.59 (2H, m, CH<sub>2</sub>-6), 2.03-2.01 (1H, m, OH), 2.00-1.98 (1H, m, OH), 1.86-1.79 (1H, m, CH-2), 1.67-1.54 (2H, m, CH<sub>2</sub>-4), 1.52-1.45 (1H, m, CH<sub>2</sub>-3<sub>a</sub>), 1.41-1.34 (1H, m, CH<sub>2</sub>-3<sub>b</sub>).

<sup>13</sup>C NMR (101 MHz, CDCl<sub>3</sub>) δ = 140.8, 129.2, 128.4, 126.0, 64.5, 63.0, 42.3, 37.9, 29.8, 26.9.

*The data are consistent with the literature.*<sup>3</sup>

#### (*S*)-2-Phenylpentane-1,5-diol, (+)-2j

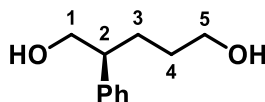

**Racemic:** LiAlH<sub>4</sub> (1.45 g, 38.3 mmol) was suspended in anhydrous THF (50 mL) at 0 °C and 2-phenylglutaric anhydride (2.43 g, 12.8 mmol) was added portionwise. The reaction mixture was warmed to room temperature and then heated at reflux, with stirring, for 4 hours. The reaction was cooled to 0 °C, diluted with a further portion of THF (50 mL) and quenched with dropwise addition of water (1.5 mL) followed by 15% aq. NaOH (1.5 mL), and water (4.5 mL). The mixture was warmed to room temperature and stirred for 10 minutes after which MgSO<sub>4</sub> was added and the mixture stirred for a further 30 minutes. The mixture was filtered through Celite® (eluting with Et<sub>2</sub>O) and

concentrated *in vacuo*. Purification by column chromatography (CH<sub>2</sub>Cl<sub>2</sub>:MeOH 95:5) afforded the title compound *rac*-**2j** (1.70 g, 74%) as a viscous, colourless oil.

**Enantioenriched:** (+)-**2j** (>99:1 e.r.) was prepared by preparative SFC separation of racemic diol *rac*-**2j** using a Chiralpak® ID column, 80:20 CO<sub>2</sub>:MeOH, 10 mL min<sup>-1</sup>, 260 nm, 35°C, 20 µL injections of 100 mg/mL diol *rac*-**2j** in MeOH; t<sub>r</sub> (*S*) = 4.3 min, t<sub>r</sub> (*R*) = 5.0 min. Absolute configuration was determined to be (*S*) by comparison of the optical rotation value with literature data.<sup>4</sup>

<sup>1</sup>H NMR (400 MHz, CDCl<sub>3</sub>) δ = 7.35-7.19 (5H, m, ArH), 3.80-3.71 (2H, m, CH<sub>2</sub>-1), 3.63-3.56 (2H, m, CH<sub>2</sub>-5), 2.84-2.76 (1H, m, CH-2), 1.87-1.79 (1H, m, CH<sub>2</sub>-3<sub>a</sub>), 1.70-1.19 (5H, m, CH<sub>2</sub>-3<sub>b</sub>, CH<sub>2</sub>-4, 2 × OH).

<sup>13</sup>C NMR (101 MHz, CDCl<sub>3</sub>) δ = 142.3, 128.8, 128.2, 126.9, 67.6, 62.8, 48.5, 30.5, 28.3.

These spectral data are consistent with the literature.<sup>5</sup>

[α]<sub>D</sub><sup>25</sup> = +22.5 (c = 1.0, EtOH). Literature value [α]<sub>D</sub><sup>25</sup> = +18.3 (c = 1.0, EtOH, 80% ee);<sup>4</sup>

Enantiomeric excess was determined by SFC; Chiralpak® ID column (5-50% MeOH:CO<sub>2</sub> gradient over 3.5 min, 2 mL min<sup>-1</sup>, DAD 210-400 nm, 40 °C):

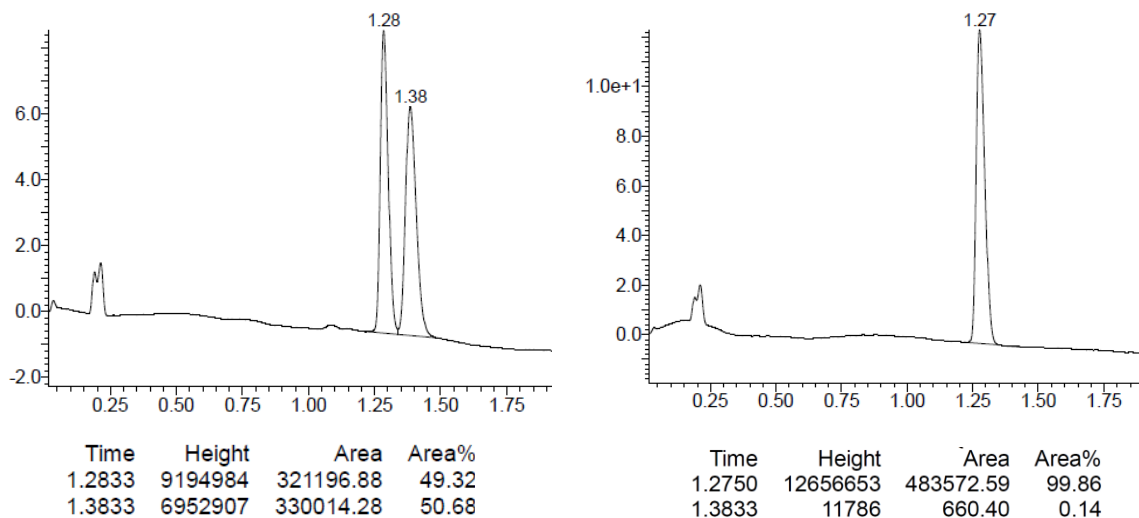

### (*S*)-2-Isobutylbutane-1,4-diol, (*-*)-**2al**

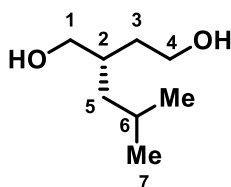

**Racemic:** LiAlH<sub>4</sub> (661 mg, 17.4 mmol) was suspended in anhydrous THF (40 mL) at 0 °C and a solution of isobutylsuccinic acid (1.01 g, 5.80 mmol) in anhydrous THF (15 mL) was added dropwise. The reaction mixture was warmed to room temperature and then heated to 70 °C for 16 hours. The reaction was then cooled to 0 °C, diluted with Et<sub>2</sub>O (50 mL) and quenched by dropwise addition of water (0.66 mL) followed by 15% aq. NaOH (0.66 mL) and water (2.0 mL). The mixture was warmed

to room temperature and stirred for 10 minutes after which  $\text{MgSO}_4$  was added, and the mixture was stirred for a further 30 minutes at room temperature. The mixture was filtered through Celite® eluting with  $\text{Et}_2\text{O}$  and concentrated *in vacuo*. Purification by column chromatography ( $\text{CH}_2\text{Cl}_2$ :MeOH 95:5) afforded diol *rac*-**2al** as a viscous, colourless oil (671 mg, 79%).

**Enantioenriched:**  $\text{LiAlH}_4$  (678 mg, 17.9 mmol) was suspended in anhydrous THF (40 mL) at 0 °C and a solution of (*S*)-(-)-2-isobutylsuccinic acid 1-methyl ester (1.12 g, 5.95 mmol) in anhydrous THF (15 mL) was added dropwise. The reaction mixture was warmed to room temperature and then heated to 70 °C for 16 hours. The reaction was then cooled to 0 °C, diluted with  $\text{Et}_2\text{O}$  (50 mL) and quenched by dropwise addition of water (0.68 mL) followed by 15% aq. NaOH (0.68 mL) and water (2.1 mL). The mixture was warmed to room temperature and stirred for 10 minutes after which  $\text{MgSO}_4$  was added, and the mixture was stirred for a further 30 minutes at room temperature. The mixture was filtered through Celite® eluting with  $\text{Et}_2\text{O}$  and concentrated *in vacuo*. Purification by column chromatography ( $\text{CH}_2\text{Cl}_2$ :MeOH 95:5) afforded diol (-)-**2al** as a viscous, colourless oil (691 mg, 79%).

$^1\text{H}$  NMR (400 MHz,  $\text{CDCl}_3$ )  $\delta$  = 3.75 (1H, ddd,  $J$  = 10.7, 6.4, 4.4 Hz,  $\text{CH}_2$ -4<sub>a</sub>), 3.66 – 3.58 (4H, m,  $\text{CH}_2$ -4<sub>b</sub>,  $\text{CH}_2$ -1<sub>a</sub> and 2 x OH), 3.41 (1H, dd,  $J$  = 10.5, 7.3 Hz,  $\text{CH}_2$ -1<sub>b</sub>), 1.76 – 1.47 (4H, m, CH-2, CH-6,  $\text{CH}_2$ -3), 1.15 (1H, dt,  $J$  = 13.9, 7.0 Hz,  $\text{CH}_2$ -5<sub>a</sub>), 1.06 (1H, dt,  $J$  = 13.9, 7.1 Hz,  $\text{CH}_2$ -5<sub>b</sub>), 0.88 (3H, d,  $J$  = 6.4 Hz,  $\text{CH}_3$ -7a), 0.86 (3H, d,  $J$  = 6.4 Hz,  $\text{CH}_3$ -7b).

$^{13}\text{C}$  NMR (101 MHz,  $\text{CDCl}_3$ )  $\delta$  = 66.6, 61.2, 41.3, 37.2, 36.2, 25.4, 23.0, 22.8.

HRMS: ESI+ found  $[\text{M}+\text{H}]^+$  = 147.1380,  $\text{C}_8\text{H}_{19}\text{O}_2$  requires 147.1380,  $\Delta$  = 0.20 ppm.

FTIR (film):  $\nu_{\text{max}}$  = 3286 (br), 2954, 1466, 1367, 1036  $\text{cm}^{-1}$ .

$[\alpha]_{\text{D}}^{25}$  = -12.6 ( $c$  = 1.0,  $\text{CHCl}_3$ ).

#### (*R*)-2-Isopropylbutane-1,4-diol, (-)-**2am**

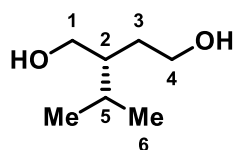

$\text{LiAlH}_4$  (1.64 g, 43.1 mmol) was suspended in anhydrous THF (100 mL) at 0 °C and a solution of (*R*)-2-isopropylsuccinic acid-1-methyl ester (2.50 g, 14.4 mmol) in anhydrous THF (30 mL) was added dropwise. The reaction mixture was warmed to room temperature and then heated to 70 °C for 16 hours. The reaction was then cooled to 0 °C, diluted with  $\text{Et}_2\text{O}$  (100 mL) and quenched by dropwise addition of water (1.6 mL) followed by 15% aq. NaOH (1.6 mL) and water (4.9 mL). The mixture was warmed to room temperature and stirred for 10 minutes after which  $\text{MgSO}_4$  was added, and the mixture was stirred for a further 30 minutes at room temperature. The mixture was filtered



through Celite® eluting with Et<sub>2</sub>O and concentrated *in vacuo*. Purification by column chromatography (CH<sub>2</sub>Cl<sub>2</sub>:MeOH 95:5) afforded diol (–)-**2am** as a viscous, colourless oil (1.53 g, 81%). The corresponding racemic diol *rac*-**2am** was prepared by an identical procedure starting from racemic 2-isobutylsuccinic acid 1-methyl ester.

<sup>1</sup>H NMR (400 MHz, CDCl<sub>3</sub>) δ = 3.77 (1H, ddd, *J* = 10.7, 6.3, 4.3 Hz, CH<sub>2</sub>-4<sub>a</sub>), 3.71 – 3.63 (3H, m, CH<sub>2</sub>-1<sub>a</sub> and 2 x OH), 3.60 (1H, ddd, *J* = 10.4, 8.1, 4.1 Hz, CH<sub>2</sub>-4<sub>b</sub>), 3.51 (1H, dd, *J* = 10.2, 7.8 Hz, CH<sub>2</sub>-1<sub>b</sub>), 1.79 – 1.65 (2H, m, CH<sub>2</sub>-3<sub>a</sub> and CH-5), 1.55 (1H, dtd, *J* = 14.3, 8.3, 4.1 Hz, CH<sub>2</sub>-3<sub>b</sub>), 1.45 (1H, dddd, *J* = 11.7, 8.3, 4.8, 3.2 Hz, CH-2), 0.89 (3H, d, *J* = 7.0 Hz, CH<sub>3</sub>-6a), 0.87 (3H, d, *J* = 7.4 Hz, CH<sub>3</sub>-6b).

<sup>13</sup>C NMR (101 MHz, CDCl<sub>3</sub>) δ = 65.1, 62.0, 45.7, 33.1, 29.8, 20.0, 19.5.

HRMS: ESI+ found [M+H]<sup>+</sup> = 133.1223, C<sub>7</sub>H<sub>17</sub>O<sub>2</sub> requires 133.1223, Δ = –0.17 ppm.

FTIR (film): ν<sub>max</sub> = 3296 (br), 2957, 1465, 1387, 1369, 1023 cm<sup>-1</sup>.

[α]<sub>D</sub><sup>25</sup> = –20.1 (*c* = 1.0, CHCl<sub>3</sub>).

#### (2*R*,5*R*)-2-methylhexane-1,5-diol, (+)-**2o**

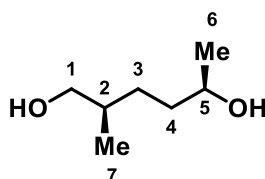

**Racemic:** We have previously reported the synthesis of diol *rac*-**2o** (12:88 d.r.).<sup>6</sup>

**Enantioenriched:** According to a modified literature procedure,<sup>7</sup> to a pre-cooled vial at 0 °C was added (*S*)-(–)-α,α-diphenyl-2-pyrrolidinemethanol trimethylsilyl ether (1.00 g, 3.10 mmol), methyl-3,4-dihydroxybenzoate (1.90 g, 12.3 mmol), propanal (4.43 mL, 61.4 mmol) and methyl vinyl ketone (7.48 mL, 92.2 mmol). The vial was sealed and stirred at 0 °C for 24 hours. The reaction solution was transferred into pre-cooled ethanol (500 mL) at 0 °C *via* syringe and sodium borohydride (11.6 g, 0.31 mol) was added portionwise. The reaction mixture was allowed to warm to room temperature and stirred for a further 16 hours. The mixture was poured onto ice and allowed to warm to room temperature. The solution was concentrated *in vacuo* to remove the majority of the EtOH and then extracted with Et<sub>2</sub>O (3 × 400 mL). The combined organic phases were dried over MgSO<sub>4</sub>, filtered and concentrated *in vacuo*. Purification by column chromatography (CH<sub>2</sub>Cl<sub>2</sub>:MeOH 95:5) afforded diol (+)-**2o** (1.23 g, 15%, ~53:47 dr,\* 94:6 er) as a colourless oil and an inseparable mixture of diastereomers. The enantiomeric purity of (+)-**2o** was determined by chiral HPLC analysis after conversion to the corresponding dibenzoyl ester (see below).

\* It was not possible to calculate dr of the crude reaction mixture or purified compound due to overlapping peaks in the <sup>1</sup>H NMR spectrum, but a dr of ~53:47 was estimated by HPLC for the benzoyl ester derivative **S1**. N.B. the major diastereoisomer of racemic and enantioenriched diols were opposite.

$^1\text{H}$  NMR (400 MHz,  $\text{CDCl}_3$ )  $\delta$  = 3.81-3.77 (1H, m,  $\text{CH}_5$ ), 3.49-3.43 (2H, m,  $\text{CH}_2$ -1), 2.29-1.39 (6H, m, 2  $\times$  OH,  $\text{CH}_2$ -2,  $\text{CH}_2$ -3, and  $\text{CH}_2$ -4<sub>a</sub>), 1.29-1.11 (1H, m,  $\text{CH}_2$ -4<sub>b</sub>), 1.19 (3H, d,  $J$  = 6.2 Hz,  $\text{CH}_3$ -6), 0.94-0.90 (3H, m,  $\text{CH}_3$ -7). N.B. no separate signals were observed for the minor diastereoisomer.

$^{13}\text{C}$  NMR (101 MHz,  $\text{CDCl}_3$ )  $\delta$  = 68.6, 68.1, 36.6, 35.9, 29.2, 23.7, 16.8. N.B. the minor diastereoisomer displays signals at  $\delta$  = 68.3, 68.2, 36.3, 35.6, 29.0, 23.8, 16.7.

HRMS: ESI+ found  $[\text{M}+\text{Na}]^+$  = 155.1040,  $\text{C}_7\text{H}_{16}\text{O}_2^{23}\text{Na}$  requires 155.1043,  $\Delta$  = -1.69 ppm.

FTIR (film):  $\nu_{\text{max}}$  = 3318, 2927, 2872, 1459, 1374, 1112, 1021, 984, 943  $\text{cm}^{-1}$ .

$[\alpha]_{\text{D}}^{25}$  = +11.0 ( $c$  = 1.0,  $\text{CHCl}_3$ ).

### (2*R*,5*R*)-2-Methylhexane-1,5-diyl dibenzoate, **S1**

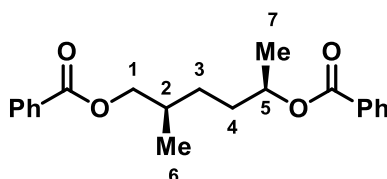

To a solution of (2*R*)-2-Methylhexane-1,5-diol (+)-**2o** (26 mg, 0.20 mmol, ~53:47 d.r.) in anhydrous  $\text{CH}_2\text{Cl}_2$  (5 mL) was added pyridine (0.05 mL, 0.60 mmol) and benzoyl chloride (0.06 mL, 0.50 mmol). The resulting solution was stirred at room temperature for 2 hours before addition of saturated aqueous  $\text{NH}_4\text{Cl}$  solution (10 mL). The mixture was extracted with  $\text{CH}_2\text{Cl}_2$  (3  $\times$  10 mL) and the combined organic phases dried over  $\text{MgSO}_4$ , filtered and concentrated *in vacuo*. Purification by column chromatography ( $\text{CH}_2\text{Cl}_2$ ) afforded diester **S1** (9.5 mg, 14%, ~53:47 dr,\* 94:6 er) as a colourless oil and an inseparable mixture of diastereomers. The corresponding racemic diester *rac*-**S1** (~13:87 d.r.) was prepared by an identical procedure starting from *rac*-**2o**.

$^1\text{H}$  NMR (400 MHz,  $\text{CDCl}_3$ )  $\delta$  = 8.04-8.00 (4H, m, ArH), 7.57-7.52 (2H, m, ArH), 7.43-7.38 (4H, m, ArH), 5.22-5.13 (1H, m,  $\text{CH}_5$ ), 4.22-4.13 (2H, m,  $\text{CH}_2$ -1), 2.03-1.94 (1H, m,  $\text{CH}_2$ -2), 1.90-1.56 (3H, m,  $\text{CH}_2$ -3 and  $\text{CH}_2$ -4<sub>a</sub>), 1.45-1.28 (1H, m,  $\text{CH}_2$ -4<sub>b</sub>), 1.36 (3H, d,  $J$  = 6.3 Hz,  $\text{CH}_3$ -7), 1.05 (3H, d,  $J$  = 6.8 Hz,  $\text{CH}_3$ -6). N.B. no separate signals were observed for the minor diastereoisomer.

$^{13}\text{C}$  NMR (101 MHz,  $\text{CDCl}_3$ )  $\delta$  = 166.7, 166.3, 133.0, 132.9, 130.9, 130.5, 129.6 (two overlapping signals), 128.5, 128.4, 71.5, 69.5, 33.6, 33.8, 29.4, 20.3, 17.2. N.B. the minor diastereoisomer displays signals at  $\delta$  = 166.7, 166.3, 133.0, 132.9, 130.9, 130.5, 129.6 (two overlapping signals), 128.5, 128.4, 71.7, 69.6, 33.4, 33.7, 29.2, 20.3, 17.0.

HRMS: ESI+ found  $[\text{M}+\text{H}]^+$  = 341.1749,  $\text{C}_{21}\text{H}_{25}\text{O}_4$  requires 341.1747,  $\Delta$  = 0.47.

FTIR (film):  $\nu_{\text{max}}$  = 1714, 1451, 1314, 1272, 1109, 1070, 1026, 710  $\text{cm}^{-1}$ .

$[\alpha]_{\text{D}}^{25}$  = +1.6 ( $c$  = 0.79,  $\text{CHCl}_3$ ).

\* It was not possible to calculate dr of the crude reaction mixture or purified compound due to overlapping peaks in the  $^1\text{H}$  NMR spectrum, but a dr of ~53:47 was estimated by HPLC.

HPLC: Enantiomeric excess was determined by HPLC with a Chiralpak® IA column (99.7:0.3 hexane:IPA, 1.0 mL min<sup>-1</sup>, 210 nm, room temperature), ~53:47 dr; major diastereomer t<sub>r</sub> (major) = 33.6 min, t<sub>r</sub> (minor) = 50.0 min, 94:6 er; minor diastereomer t<sub>r</sub> (minor) = 31.0 min, t<sub>r</sub> (major) = 42.3 min; 94:6 er. [N.B. racemate with ~13:87 d.r.].

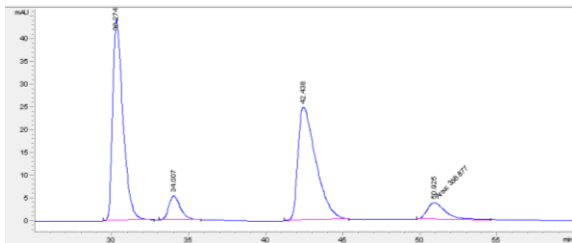

| # | Time   | Type | Area   | Height | Width  | Area%  | Symmetry |
|---|--------|------|--------|--------|--------|--------|----------|
| 1 | 30.274 | BB   | 2066.9 | 44.3   | 0.7003 | 43.804 | 0.521    |
| 2 | 34.007 | BB   | 273.9  | 5.3    | 0.731  | 5.806  | 0.712    |
| 3 | 42.438 | BB   | 2020.9 | 24.9   | 1.1189 | 42.827 | 0.427    |
| 4 | 50.925 | MM   | 356.9  | 3.8    | 1.5701 | 7.563  | 0.51     |

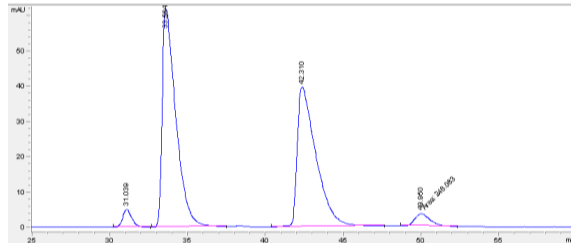

| # | Time   | Type | Area   | Height | Width  | Area%  | Symmetry |
|---|--------|------|--------|--------|--------|--------|----------|
| 1 | 31.039 | BB   | 207    | 5      | 0.6157 | 2.747  | 0.738    |
| 2 | 33.564 | BB   | 3761.4 | 61.5   | 0.8959 | 49.913 | 0.357    |
| 3 | 42.31  | BB   | 3321.3 | 39.4   | 1.1645 | 44.074 | 0.337    |
| 4 | 49.95  | MM   | 246.1  | 3.5    | 1.1826 | 3.266  | 0.672    |

## 4.2 Hydrogen Borrowing Annulation

### N-Benzyl-4-methylpiperidine, **3a**

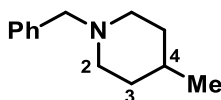

Commercially available 4-methylpentane-1,5-diol **2a** (118 mg, 1.0 mmol), anhydrous benzylamine (0.16 mL, 1.5 mmol), [IrCp\*Cl<sub>2</sub>]<sub>2</sub> (8.0 mg, 1.0 mol%), NaHCO<sub>3</sub> (1.7 mg, 2.0 mol%) and anhydrous toluene (0.5 mL) were subjected to **general procedure A**. Purification by column chromatography (pentane:Et<sub>2</sub>O 50:50) afforded piperidine **3a** (182 mg, 96%) as a yellow oil.

<sup>1</sup>H NMR (400 MHz, CDCl<sub>3</sub>) δ = 7.32-7.21 (5H, m, ArH), 3.48 (2H, s, NCH<sub>2</sub>Ph), 2.87-2.82 (2H, m, 2 × CH<sub>2</sub>-2<sub>eq</sub>), 1.93 (2H, td, *J* = 11.5, 2.4 Hz, 2 × CH<sub>2</sub>-2<sub>ax</sub>), 1.62-1.56 (2H, m, 2 × CH<sub>2</sub>-3<sub>a</sub>), 1.41-1.30 (1H, m, CH-4), 1.29-1.19 (2H, m, 2 × CH<sub>2</sub>-3<sub>b</sub>), 0.91 (3H, d, *J* = 6.2 Hz, CH<sub>3</sub>).

<sup>13</sup>C NMR (101 MHz, CDCl<sub>3</sub>) δ = 138.9, 129.4, 128.2, 127.0, 63.7, 54.1, 34.5, 30.9, 22.1.

*The data are consistent with the literature.*<sup>8</sup>

### N-Benzyl-4-phenylpiperidine, **3b**

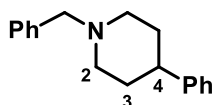

3-Phenylpentane-1,5-diol<sup>6</sup> **2b** (180 mg, 1.0 mmol), anhydrous benzylamine (0.16 mL, 1.5 mmol), [IrCp\*Cl<sub>2</sub>]<sub>2</sub> (8.0 mg, 1.0 mol%), NaHCO<sub>3</sub> (1.7 mg, 2.0 mol%) and anhydrous toluene (0.5 mL) were subjected to **general procedure A**. Purification by column chromatography (pentane:Et<sub>2</sub>O 60:40) afforded piperidine **3b** (208 mg, 83%) as a yellow oil.

<sup>1</sup>H NMR (400 MHz, CDCl<sub>3</sub>) δ = 7.18-7.39 (10H, m, ArH), 3.58 (2H, s, NCH<sub>2</sub>Ph), 3.06-3.01 (2H, m, 2 × CH<sub>2</sub>-2<sub>a</sub>), 2.58-2.46 (1H, m, CH-4), 2.16-2.08 (2H, m, 2 × CH<sub>2</sub>-2<sub>b</sub>), 1.86-1.80 (4H, m, 2 × CH<sub>2</sub>-3).

<sup>13</sup>C NMR (101 MHz, CDCl<sub>3</sub>) δ = 146.7, 138.7, 129.4, 128.5, 128.3, 127.1, 127.0, 126.2, 63.7, 54.4, 42.9, 33.7.

HRMS: ESI+ found [M+H]<sup>+</sup> = 252.1742, C<sub>18</sub>H<sub>22</sub>N requires 252.1747, Δ = -2.09 ppm.

FTIR (film): ν<sub>max</sub> = 3027, 2934, 2798, 2750, 1493, 1452, 1366, 991, 735, 696 cm<sup>-1</sup>.

### **N-Benzyl-4-(4-fluorophenyl)piperidine, 3c**

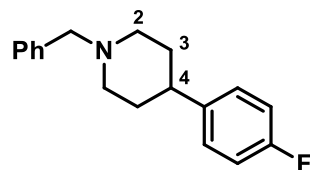

3-(4-Fluorophenyl)-pentane-1,5-diol<sup>6</sup> **2c** (198 mg, 1.0 mmol), anhydrous benzylamine (0.16 mL, 1.5 mmol), [IrCp\*Cl<sub>2</sub>]<sub>2</sub> (8.0 mg, 1.0 mol%), NaHCO<sub>3</sub> (1.7 mg, 2.0 mol%) and anhydrous toluene (0.5 mL) were subjected to **general procedure A**. Purification by column chromatography (pentane:Et<sub>2</sub>O 60:40) afforded piperidine **3c** (215 mg, 80%) as a yellow oil.

<sup>1</sup>H NMR (400 MHz, CDCl<sub>3</sub>) δ = 7.37-7.31 (4H, m, ArH), 7.29-7.24 (1H, m, ArH), 7.21-7.15 (2H, m, ArH), 7.01-6.94 (2H, m, ArH), 3.55 (2H, s, NCH<sub>2</sub>Ph), 3.05-2.98 (2H, m, 2 x CH<sub>2</sub>-2<sub>eq</sub>), 2.48 (1H, tt, *J* = 10.3, 5.2 Hz, CH-4<sub>ax</sub>), 2.08 (2H, td, *J* = 11.2, 3.7 Hz, 2 x CH<sub>2</sub>-2<sub>ax</sub>), 1.83-1.75 (4H, m, 2 x CH<sub>2</sub>-3).

<sup>13</sup>C NMR (101 MHz, CDCl<sub>3</sub>) δ = 161.3 (d, *J* = 243.3 Hz), 142.2 (d, *J* = 3.1 Hz), 138.4, 129.3, 128.2, 128.2, 127.0, 115.1 (d, *J* = 20.9 Hz), 63.5, 54.2, 42.0, 33.7.

<sup>19</sup>F NMR (376 MHz, CDCl<sub>3</sub>) δ = -117.5.

HRMS: ESI+ found [M+H]<sup>+</sup> = 270.1651, C<sub>18</sub>H<sub>21</sub>FN requires 270.1653, Δ -0.46 ppm.

FTIR (film): ν<sub>max</sub> = 2935, 2800, 1604, 1509, 1453, 1366, 1342, 1223, 1159, 1031, 992, 832, 795, 773, 737, 698, 613 cm<sup>-1</sup>.

### **N-Benzyl-4-(4-methoxyphenyl)piperidine, 3d**

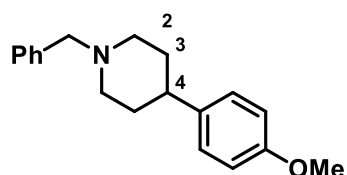

3-(4-Methoxyphenyl)-pentane-1,5-diol<sup>6</sup> **2d** (198 mg, 1.0 mmol), anhydrous benzylamine (0.16 mL, 1.5 mmol), [IrCp\*Cl<sub>2</sub>]<sub>2</sub> (8.0 mg, 1.0 mol%), NaHCO<sub>3</sub> (1.7 mg, 2.0 mol%) and anhydrous toluene (0.5 mL) were subjected to **general procedure A**. Purification by column chromatography (pentane:Et<sub>2</sub>O 50:50) afforded piperidine **3d** (258 mg, 92%) as a colourless solid.

<sup>1</sup>H NMR (400 MHz, CDCl<sub>3</sub>) δ = 7.80-7.31 (4H, m, ArH), 7.29-7.24 (1H, m, ArH), 7.18-7.14 (2H, m, ArH), 6.87-6.83 (2H, m, ArH), 3.79 (3H, s, OCH<sub>3</sub>), 3.56 (2H, s, NCH<sub>2</sub>Ph), 3.04-2.98 (2H, m, 2 x CH<sub>2</sub>-2<sub>eq</sub>), 2.46 (1H, tt, *J* = 11.0, 5.5 Hz, CH-4<sub>ax</sub>), 2.08 (2H, td, *J* = 10.9, 3.8 Hz, 2 x CH<sub>2</sub>-2<sub>ax</sub>), 1.83 - 1.70 (4H, m, 2 x CH<sub>2</sub>-3).

<sup>13</sup>C NMR (101 MHz, CDCl<sub>3</sub>) δ = 157.9, 138.8, 138.5, 129.3, 128.2, 127.7, 127.0, 113.8, 63.6, 55.3, 54.4, 41.8, 33.8.

HRMS: ESI+ found  $[M+H]^+ = 282.1851$ ,  $C_{19}H_{24}NO$  requires 282.1852,  $\Delta -0.54$  ppm.

FTIR (film):  $\nu_{\max} = 2941, 2795, 2752, 1608, 1512, 1467, 1365, 1327, 1244, 1176, 1146, 1115, 1033, 989, 833, 808, 766, 739, 696, 613$   $\text{cm}^{-1}$ .

Melting point = 68–71 °C.

### **N-Benzyl-4-(naphthalen-2-yl)piperidine, 3e**

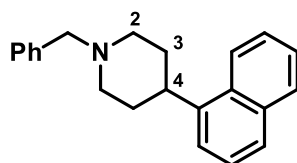

3-(Naphthalene-1-yl)-pentane-1,5-diol<sup>6</sup> **2e** (230 mg, 1.0 mmol), anhydrous benzylamine (0.16 mL, 1.5 mmol),  $[\text{IrCp}^*\text{Cl}_2]_2$  (8.0 mg, 1.0 mol%),  $\text{NaHCO}_3$  (1.7 mg, 2.0 mol%) and anhydrous toluene (0.5 mL) were subjected to **general procedure A**. Purification by column chromatography (pentane:Et<sub>2</sub>O 60:40) afforded piperidine **3e** (261 mg, 87%) as a colourless solid.

<sup>1</sup>H NMR (400 MHz, CDCl<sub>3</sub>)  $\delta = 8.11$  (1H, d,  $J = 8.4$  Hz, ArH), 7.87 (1H, dd,  $J = 7.6, 2.0$  Hz, ArH), 7.72 (1H, dd,  $J = 6.8, 2.6$  Hz, ArH), 7.55-7.33 (8H, m, ArH), 7.31-7.27 (1H, m, ArH), 3.63 (2H, s, NCH<sub>2</sub>Ph), 3.34 (1H, tt,  $J = 10.7, 5.2$  Hz, CH-4<sub>ax</sub>), 3.15-3.07 (2H, m, 2 x CH<sub>2</sub>-2<sub>eq</sub>), 2.27 (2H, td,  $J = 11.1, 4.2$  Hz, 2 x CH<sub>2</sub>-2<sub>ax</sub>), 2.03-1.92 (4H, m, 2 x CH<sub>2</sub>-3).

<sup>13</sup>C NMR (101 MHz, CDCl<sub>3</sub>)  $\delta = 142.2, 138.5, 133.9, 131.4, 129.3, 129.0, 128.2, 127.0, 126.5, 125.7, 125.7, 125.3, 123.0, 122.5, 63.6, 54.6, 37.6, 33.2$ .

HRMS: ESI+ found  $[M+H]^+ = 302.1902$ ,  $C_{22}H_{24}N$  requires 302.1903,  $\Delta -0.44$  ppm.

FTIR (film):  $\nu_{\max} = 3048, 2936, 2799, 1597, 1494, 1453, 1396, 1366, 1343, 1144, 988, 778, 737, 699$   $\text{cm}^{-1}$ .

Melting point = 76–78 °C.

### **N-Benzyl-4-(trifluoromethyl)piperidine, 3f**

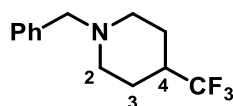

4-(Trifluoromethyl)-pentane-1,5-diol<sup>9</sup> **2f** (172 mg, 1.0 mmol), anhydrous benzylamine (0.16 mL, 1.5 mmol),  $[\text{IrCp}^*\text{Cl}_2]_2$  (8.0 mg, 1.0 mol%),  $\text{NaHCO}_3$  (1.7 mg, 2.0 mol%) and anhydrous toluene (0.5 mL) were subjected to **general procedure A**. Purification by column chromatography (pentane:Et<sub>2</sub>O 90:10) afforded piperidine **3f** (192 mg, 79%) as a pale yellow oil.

$^1\text{H}$  NMR (400 MHz,  $\text{CDCl}_3$ )  $\delta$  = 7.36-7.24 (5H, m, ArH), 3.51 (2H, s,  $\text{NCH}_2\text{Ph}$ ), 2.97 (2H, m,  $2 \times \text{CH}_2\text{-2}_{\text{eq}}$ ), 2.05-1.91 (3H, m,  $\text{CH-4}$  and  $2 \times \text{CH}_2\text{-2}_{\text{ax}}$ ), 1.85-1.78 (2H, m,  $2 \times \text{CH}_2\text{-3}_{\text{eq}}$ ), 1.64 (2H, qd,  $J$  = 12.7, 3.9 Hz,  $2 \times \text{CH}_2\text{-3}_{\text{ax}}$ ).

$^{13}\text{C}$  NMR (101 MHz,  $\text{CDCl}_3$ )  $\delta$  = 138.3, 129.2, 128.4, 127.7 (q,  $J$  = 278.4 Hz), 127.2, 63.2, 52.5, 40.5 (q,  $J$  = 27.1 Hz), 24.8.

$^{19}\text{F}$  NMR (376 MHz,  $\text{CDCl}_3$ )  $\delta$  = -73.7

*The data are consistent with the literature.*<sup>10</sup>

### ***N*-Benzylmorpholine, 3g**

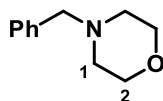

Commercially available diethylene glycol **2g** (106 mg, 1.0 mmol), anhydrous benzylamine (0.16 mL, 1.5 mmol),  $[\text{IrCp}^*\text{Cl}_2]_2$  (8.0 mg, 1.0 mol%) and deionised water (0.5 mL) were subjected to **general procedure B** at 110 °C. Purification by column chromatography (pentane:Et<sub>2</sub>O 80:20) afforded piperazine **3g** as a colourless oil (74 mg, 35%) as an inseparable mixture with dibenzylamine (14 mol%, *the spectral data for dibenzylamine are consistent with the literature*<sup>12</sup>).

$^1\text{H}$  NMR (400 MHz,  $\text{CDCl}_3$ )  $\delta$  = 7.36-7.24 (5H, m, ArH), 3.72-3.70 (4H, m,  $2 \times \text{CH}_2\text{-2}$ ), 3.50 (2H, s,  $\text{NCH}_2\text{Ph}$ ), 2.46-2.43 (4H, m,  $2 \times \text{CH}_2\text{-1}$ ).

$^{13}\text{C}$  NMR (101 MHz,  $\text{CDCl}_3$ )  $\delta$  = 137.9, 129.3, 128.4, 127.3, 67.2, 63.6, 53.8.

*The data are consistent with the literature.*<sup>11</sup>

### ***N, N'*-Dibenzylpiperazine, 3h**

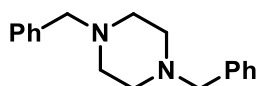

Commercially available *N*-benzyl-diethanolamine **2h** (195 mg, 1.0 mmol), anhydrous benzylamine (0.16 mL, 1.5 mmol),  $[\text{IrCp}^*\text{Cl}_2]_2$  (8.0 mg, 1.0 mol%) and deionised water (0.5 mL) were subjected to **general procedure B** at 110 °C. Purification by column chromatography (pentane:Et<sub>2</sub>O 80:20) afforded piperazine **3h** (48 mg, 16%) as a pale yellow solid as an inseparable mixture with dibenzylamine (15 mol%, *the spectral data for dibenzylamine are consistent with the literature*<sup>12</sup>).

$^1\text{H}$  NMR (400 MHz,  $\text{CDCl}_3$ )  $\delta$  = 7.35-7.22 (10H, m, ArH), 3.51 (4H, s,  $2 \times \text{NCH}_2\text{Ph}$ ), 2.48 (8H, br. s,  $4 \times \text{CH}_2\text{-2}$ ).

$^{13}\text{C}$  NMR (101 MHz,  $\text{CDCl}_3$ )  $\delta$  = 138.3, 129.4, 128.3, 127.1, 63.2, 53.2.

*The data are consistent with the literature.*<sup>13</sup>

### 1-Benzyl-3-methylpiperidine, **3i**

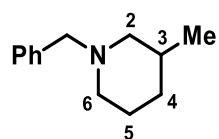

2-Methylhexane-1,5-diol<sup>6</sup> *rac-2i* (118 mg, 1.0 mmol, >99:1 er), anhydrous benzylamine (0.16 mL, 1.5 mmol), [IrCp\*Cl<sub>2</sub>]<sub>2</sub> (8.0 mg, 1.0 mol%) and anhydrous toluene (0.5 mL) were subjected to **general procedure A**. Purification by column chromatography (pentane:Et<sub>2</sub>O 90:10) afforded piperidine **3i** (122 mg, 64%) as a colourless oil.

<sup>1</sup>H NMR (400 MHz, CDCl<sub>3</sub>) δ = 7.33-7.22 (5H, m, ArH), 3.48 (2H, s, NCH<sub>2</sub>Ph), 2.79 (2H, m, CH<sub>2</sub>-2<sub>a</sub> and CH<sub>2</sub>-6<sub>eq</sub>), 1.85 (1H, td, *J* = 11.1, 3.7 Hz, CH<sub>2</sub>-6<sub>ax</sub>), 1.72-1.51 (5H, m, CH<sub>2</sub>-2<sub>b</sub>, CH-3, CH<sub>2</sub>-4<sub>a</sub> and CH<sub>2</sub>-5), 0.90-0.86 (1H, m, CH<sub>2</sub>-4<sub>b</sub>), 0.83 (3H, d, *J* = 6.4 Hz, CH<sub>3</sub>).

<sup>13</sup>C NMR (101 MHz, CDCl<sub>3</sub>) δ = 138.8, 129.3, 128.2, 126.9, 63.8, 62.1, 54.1, 33.2, 31.3, 25.7, 19.9.

HRMS: ESI+ found [M+H]<sup>+</sup> = 190.1590, C<sub>13</sub>H<sub>20</sub>N requires 190.1590, Δ = -0.04 ppm.

FTIR (film): ν<sub>max</sub> = 2927, 2794, 2756, 1454, 1346, 1120, 1073, 1028, 976, 737, 698 cm<sup>-1</sup>.

### *N*-Benzyl-3-phenylpiperidine, **3j**

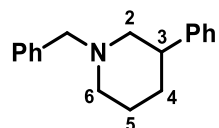

2-Phenylpentane-1,5-diol<sup>6</sup> *rac-2j* (180 mg, 1.0 mmol), anhydrous benzylamine (0.16 mL, 1.5 mmol), [IrCp\*Cl<sub>2</sub>]<sub>2</sub> (8.0 mg, 1.0 mol%), NaHCO<sub>3</sub> (1.7 mg, 2.0 mol%) and anhydrous toluene (0.5 mL) were subjected to **general procedure A**. Purification by column chromatography (pentane:Et<sub>2</sub>O 90:10) afforded piperidine **3j** (162 mg, 64%) as a colourless solid.

<sup>1</sup>H NMR (400 MHz, CDCl<sub>3</sub>) δ = 7.39-7.22 (10H, m, ArH), 3.55 (2H, s, NCH<sub>2</sub>Ph), 3.01 (1H, ddt, *J* = 11.0, 3.6, 1.7 Hz, CH<sub>2</sub>-2<sub>eq</sub>), 2.96-2.91 (1H, m, CH<sub>2</sub>-6<sub>a</sub>), 2.85 (1H, tt, *J* = 11.6, 3.7 Hz, CH-3<sub>ax</sub>), 2.05 (1H, t, *J* = 11.1 Hz, CH<sub>2</sub>-2<sub>ax</sub>), 2.03-1.90 (2H, m, CH<sub>2</sub>-6<sub>b</sub> and CH<sub>2</sub>-4<sub>a</sub>), 1.81-1.67 (2H, m, CH<sub>2</sub>-5), 1.51-1.41 (1H, m, CH<sub>2</sub>-4<sub>b</sub>).

<sup>13</sup>C NMR (101 MHz, CDCl<sub>3</sub>) δ = 145.0, 138.5, 129.3, 128.4, 128.3, 127.4, 127.0, 126.4, 63.7, 61.2, 53.9, 43.1, 31.8, 25.9.

Melting point = 45–47 °C.



### 1,3-Dibenzylpiperidine, **3k**

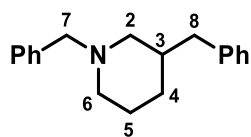

2-Benzylpentane-1,5-diol *rac*-**2k** (194 mg, 1.0 mmol), anhydrous benzylamine (0.16 mL, 1.5 mmol), [IrCp\*Cl<sub>2</sub>]<sub>2</sub> (8.0 mg, 1.0 mol%), NaHCO<sub>3</sub> (1.7 mg, 2.0 mol%) and anhydrous toluene (0.5 mL) were subjected to **general procedure A**. Purification by column chromatography (pentane:Et<sub>2</sub>O 90:10) afforded piperidine **3k** (208 mg, 78%) as a colourless oil.

<sup>1</sup>H NMR (400 MHz, CDCl<sub>3</sub>) δ = 7.34-7.13 (10H, m, ArH), 3.57-3.40 (2H, m, CH<sub>2</sub>-7), 2.81 (1H, dd, *J* = 10.9, 3.0 Hz, CH<sub>2</sub>-2<sub>eq</sub>), 2.76 (1H, d, *J* = 11.0 Hz, CH<sub>2</sub>-6<sub>a</sub>), 2.61-2.43 (2H, m, CH<sub>2</sub>-8), 1.96-1.86 (2H, m, CH-3 and CH<sub>2</sub>-6<sub>b</sub>), 1.79 (1H, t, *J* = 10.4 Hz, CH<sub>2</sub>-2<sub>ax</sub>), 1.71-1.61 (2H, m, CH<sub>2</sub>-4<sub>a</sub> and CH<sub>2</sub>-5<sub>a</sub>), 1.56-1.45 (1H, m, CH<sub>2</sub>-4<sub>b</sub>), 1.00-0.92 (1H, m, CH<sub>2</sub>-5<sub>b</sub>).

<sup>13</sup>C NMR (101 MHz, CDCl<sub>3</sub>) δ = 140.8, 138.8, 129.3, 129.2, 128.3, 128.2, 127.0, 125.9, 63.7, 60.4, 54.1, 41.1, 38.2, 30.7, 25.3.

*The data are consistent with the literature.*<sup>14</sup>

### *N*-Benzyl-3-methylpyrrolidine, **3l**

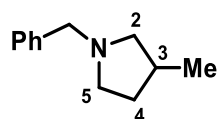

2-Methylpentane-1,4-diol<sup>15</sup> *rac*-**2l** (104 mg, 1.0 mmol), anhydrous benzylamine (0.16 mL, 1.5 mmol), NaHCO<sub>3</sub> (1.7 mg, 2.0 mol%), [IrCp\*Cl<sub>2</sub>]<sub>2</sub> (8.0 mg, 1.0 mol%) and anhydrous toluene (0.5 mL) were subjected to **general procedure A**. Purification by column chromatography (pentane:Et<sub>2</sub>O 90:10) afforded pyrrolidine **3l** (74 mg, 42%) as a colourless oil.

<sup>1</sup>H NMR (400 MHz, CDCl<sub>3</sub>) δ = 7.35-7.21 (5H, m, ArH), 3.63-3.56 (2H, m, NCH<sub>2</sub>Ph), 2.82 (1H, dd, *J* = 9.0, 7.4 Hz, CH<sub>2</sub>-2<sub>a</sub>), 2.70 (1H, ddd, *J* = 9.2, 8.0, 5.4 Hz, CH<sub>2</sub>-5<sub>a</sub>), 2.45 (1H, td, *J* = 8.8, 6.4 Hz, CH<sub>2</sub>-5<sub>b</sub>), 2.32-2.19 (1H, m, CH-3), 2.07-1.96 (2H, m, CH<sub>2</sub>-2<sub>b</sub> and CH<sub>2</sub>-4<sub>a</sub>), 1.34 (1H, dddd, *J* = 12.6, 8.5, 6.3, 5.4 Hz, CH<sub>2</sub>-4<sub>b</sub>), 1.01 (3H, d, *J* = 6.8 Hz, CH<sub>3</sub>).

<sup>13</sup>C NMR (101 MHz, CDCl<sub>3</sub>) δ = 139.6, 129.0, 128.3, 126.9, 62.4, 61.0, 54.3, 32.8, 32.0, 20.6.

HRMS: ESI+ found [M+H]<sup>+</sup> = 176.1434, C<sub>12</sub>H<sub>18</sub>N requires 176.1434, Δ = - 0.03 ppm.

FTIR (film): ν<sub>max</sub> = 2955, 2783, 1453, 1375, 1155, 1136, 1124, 1029, 907, 739, 698 cm<sup>-1</sup>.

***rac*-(2*R*,3*R*)-1-Benzyl-2,3-dimethylpiperidine, 3*m***

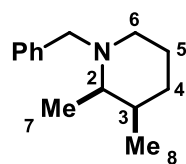

4-methylhexane-1,5-diol<sup>6</sup> *rac*-**2m** (132 mg, 1.0 mmol), anhydrous benzylamine (0.16 mL, 1.5 mmol), [IrCp\*Cl<sub>2</sub>]<sub>2</sub> (8.0 mg, 1.0 mol%), NaHCO<sub>3</sub> (1.7 mg, 2.0 mol%) and anhydrous toluene (0.5 mL) were subjected to **general procedure A**. NMR analysis of the crude reaction mixture indicated the presence of two diastereomers in 89:11 dr. Purification by column chromatography (pentane:Et<sub>2</sub>O 90:10) afforded piperidine **3m**<sub>maj</sub> (132 mg, 65%, >95:5 d.r.) as a colourless oil and piperidine **3m**<sub>min</sub> (20 mg, 10%, >95:5 d.r.) as a colourless oil. The relative stereochemistry was determined by *J*-coupling constant analysis.

Data for the major diastereoisomer:

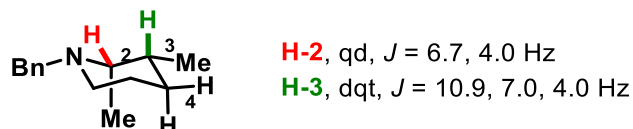

<sup>1</sup>H NMR (400 MHz, CDCl<sub>3</sub>) δ = 7.37-7.20 (5H, m, ArH), 3.66-3.50 (2H, m, NCH<sub>2</sub>Ph), 2.77 (1H, qd, *J* = 6.7, 4.0 Hz, CH-2), 2.45 (1H, ddd, *J* = 11.7, 9.9, 3.9 Hz, CH<sub>2</sub>-6<sub>ax</sub>), 2.32 (1H, dt, *J* = 11.7, 4.1 Hz, CH<sub>2</sub>-6<sub>eq</sub>), 1.89 (1H, dqt, *J* = 10.9, 7.0, 4.0 Hz, CH-3), 1.61-1.40 (3H, m, CH<sub>2</sub>-4 and CH<sub>2</sub>-5<sub>eq</sub>), 1.32-1.21 (1H, m, CH<sub>2</sub>-5<sub>ax</sub>), 0.90 (3H, d, *J* = 6.7 Hz, CH<sub>3</sub>-7), 0.86 (3H, d, *J* = 7.0 Hz, CH<sub>3</sub>-8).

<sup>13</sup>C NMR (101 MHz, CDCl<sub>3</sub>) δ = 140.5, 128.7, 128.2, 126.7, 59.3, 57.8, 46.8, 35.1, 28.1, 25.2, 18.1, 6.7.

HRMS: ESI+ found [M+H]<sup>+</sup> = 204.1747, C<sub>14</sub>H<sub>22</sub>N requires 204.1747, Δ = 0.26 ppm.

FTIR (film): ν<sub>max</sub> = 2926, 2793, 1494, 1452, 1373, 1142, 1122, 1090, 1027, 955, 731, 697 cm<sup>-1</sup>.

Data for the minor diastereoisomer:

<sup>1</sup>H NMR (400 MHz, CDCl<sub>3</sub>) δ = 7.34-7.21 (5H, m, ArH), 3.99 (1H, d, *J* = 13.6 Hz, NCH<sub>2a</sub>Ph), 3.28 (1H, d, *J* = 13.6 Hz, NCH<sub>2b</sub>Ph), 2.75 (1H, dtd, *J* = 11.6, 3.9, 1.5 Hz, CH<sub>2</sub>-6<sub>eq</sub>), 2.07-1.96 (2H, m, CH-2 and CH<sub>2</sub>-6<sub>ax</sub>), 1.71-1.64 (1H, m, CH<sub>2</sub>-4<sub>a</sub>), 1.54-1.48 (2H, m, CH<sub>2</sub>-5), 1.44-1.35 (1H, m, CH-3), 1.21 (3H, d, *J* = 6.1 Hz, CH<sub>3</sub>-7), 1.09-0.97 (1H, m, CH<sub>2</sub>-4<sub>b</sub>), 0.95 (3H, d, *J* = 6.6 Hz, CH<sub>3</sub>-8).

<sup>13</sup>C NMR (101 MHz, CDCl<sub>3</sub>) δ = 139.9, 129.2, 128.2, 126.7, 62.8, 58.1, 52.3, 37.0, 33.1, 24.8, 20.1, 17.0.

HRMS: ESI+ found [M+H]<sup>+</sup> = 204.1747, C<sub>14</sub>H<sub>22</sub>N requires 204.1747, Δ = 0.11 ppm.

FTIR (film): ν<sub>max</sub> = 2928, 2787, 1494, 1454, 1368, 1119, 1028, 733, 698 cm<sup>-1</sup>.

***rac*-(2*S*,4*S*)-1-Benzyl-2,4-dimethylpiperidine, 3n**

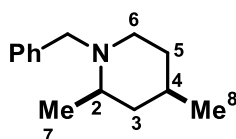

3-Methylhexane-1,5-diol<sup>6</sup> *rac*-**2n** (132 mg, 1.0 mmol), anhydrous benzylamine (0.16 mL, 1.5 mmol), [IrCp\*Cl<sub>2</sub>]<sub>2</sub> (8.0 mg, 1.0 mol%), NaHCO<sub>3</sub> (1.7 mg, 2.0 mol%) and anhydrous toluene (0.5 mL) were subjected to **general procedure A** at 110 °C. Purification by column chromatography (pentane:Et<sub>2</sub>O 75:25) afforded piperidine **3n** (126 mg, 62%, 82:18 d.r.) as a colourless oil as a mixture of diastereoisomers. The relative stereochemistry was determined by *J*-coupling constant analysis. A small quantity of diastereoisomerically pure *cis*-**3n** (34 mg, >95:5 d.r.) was isolated by column chromatography (pentane:Et<sub>2</sub>O 85:15).

HRMS: ESI+ found [M+H]<sup>+</sup> = 204.1747, C<sub>14</sub>H<sub>22</sub>N requires 204.1747, Δ = 0.26 ppm.

FTIR (film): ν<sub>max</sub> = 2949, 2916, 1494, 1453, 1373, 1328, 1192, 1135, 1123, 1065, 1029, 730, 697 cm<sup>-1</sup>.

Data for the major diastereoisomer:

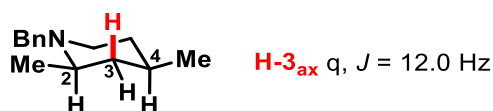

<sup>1</sup>H NMR (400 MHz, CDCl<sub>3</sub>) δ = 7.30 – 7.11 (5H, m, ArH), 4.03 (1H, d, *J* = 13.3 Hz, NCH<sub>2a</sub>Ph), 3.03 (1H, d, *J* = 13.3 Hz, NCH<sub>2b</sub>Ph), 2.71 (1H, ddd, *J* = 11.6, 3.9, 2.8 Hz, CH<sub>2-6eq</sub>), 2.11 (1H, dqd, *J* = 12.0, 6.0, 2.7 Hz, CH-2), 1.81 (1H, ddd, *J* = 12.5, 11.6, 2.6 Hz, CH<sub>2-6ax</sub>), 1.56 – 1.25 (3H, m, CH<sub>2-3eq</sub>, CH<sub>2-5eq</sub>, CH-4), 1.13 (3H, d, *J* = 6.1 Hz, CH<sub>3-7</sub>), 1.04 (1H, qd, *J* = 12.6, 3.8 Hz, CH<sub>2-5ax</sub>), 0.97 (1H, q, *J* = 12.0 Hz, CH<sub>2-3ax</sub>), 0.81 (3H, d, *J* = 6.6 Hz, CH<sub>3-8</sub>).

<sup>13</sup>C NMR (101 MHz, CDCl<sub>3</sub>) δ = 139.6, 129.3, 128.2, 126.7, 58.3, 57.0, 53.2, 44.1, 34.6, 31.5, 22.2, 21.6.

Data for the minor diastereoisomer:

<sup>1</sup>H NMR (400 MHz, CDCl<sub>3</sub>) δ = 7.30 – 7.11 (5H, m, ArH), 3.55 (1H, d, *J* = 13.5 Hz, NCH<sub>2a</sub>Ph), 3.45 (1H, d, *J* = 13.5 Hz, NCH<sub>2b</sub>Ph), 2.93 – 2.85 (1H, m, CH-2), 2.44 – 2.31 (2H, m, CH<sub>2-6</sub>), 1.70 – 1.58 (1H, m, CH-4), 1.56 – 1.25 (3H, m, CH<sub>2-3</sub> and CH<sub>2-5a</sub>), 1.15 – 1.09 (1H, m, CH<sub>2-5b</sub>), 0.95 (3H, d, *J* = 6.7 Hz, CH<sub>3-7</sub>), 0.84 – 0.81 (3H, m, CH<sub>3-8</sub>).

<sup>13</sup>C NMR (101 MHz, CDCl<sub>3</sub>) δ = 140.2, 128.9, 128.2, 126.7, 59.2, 52.0, 45.9, 40.7, 34.1, 25.2, 21.8, 11.9.

***rac*-(2*R*,5*R*)-*N*-Benzyl-2,5-dimethylpiperidine, 3o**

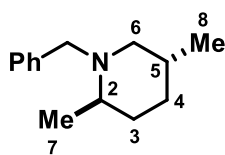

2-Methylhexane-1,5-diol<sup>6</sup> *rac*-**2o** (132 mg, 1.0 mmol), anhydrous benzylamine (0.16 mL, 1.5 mmol), [IrCp\*Cl<sub>2</sub>]<sub>2</sub> (8.0 mg, 1.0 mol%), NaHCO<sub>3</sub> (1.7 mg, 2.0 mol%) and anhydrous toluene (0.5 mL) were subjected to **general procedure A** at 110 °C. <sup>1</sup>H NMR analysis of the crude reaction mixture indicated the presence of two diastereomers in 71:29 dr. Purification by column chromatography (pentane:Et<sub>2</sub>O 90:10) afforded piperidine **3o** (138 mg, 68%, 72:28 d.r.) as a colourless oil as a mixture of diastereoisomers. An small quantity of each diastereoisomer was obtained by column chromatography (pentane:Et<sub>2</sub>O 90:10). The relative stereochemistry was determined by a combination of *J*-coupling constant and nOe analysis.

HRMS: ESI+ found [M+H]<sup>+</sup> = 204.1748, C<sub>14</sub>H<sub>22</sub>N requires 204.1747, Δ = 0.63 ppm.

FTIR (film): ν<sub>max</sub> = 2925, 1494, 1454, 1370, 1144, 1125, 1064, 732, 697 cm<sup>-1</sup>.

Data for the major diastereomer:

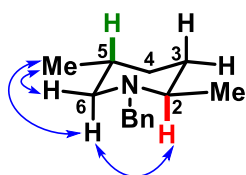

**H-2<sub>ax</sub>** dqd, *J* = 12.0, 6.1, 2.7 Hz

**H-5<sub>ax</sub>** was not fully resolved but contains large *J* values indicative of axial geometry.

**nOe** correlations shown with solid blue arrows.

<sup>1</sup>H NMR (400 MHz, CDCl<sub>3</sub>) δ = 7.34-7.21 (5H, m, ArH), 4.07 (1H, d, *J* = 13.5 Hz, NCH<sub>2a</sub>Ph), 3.14 (1H, d, *J* = 13.5 Hz, NCH<sub>2b</sub>Ph), 2.74-2.70 (1H, m, CH<sub>2-6a</sub>), 2.12 (1H, dqd, *J* = 12.0, 6.1, 2.7 Hz, CH-2<sub>ax</sub>), 1.70-1.33 (5H, m, CH<sub>2-3</sub>, CH<sub>2-4a</sub>, CH-5, and CH<sub>2-6b</sub>), 1.21 (3H, d, *J* = 6.1 Hz, CH<sub>3-7</sub>), 0.96-0.85 (1H, m, CH<sub>2-4b</sub>), 0.76 (3H, d, *J* = 6.2 Hz, CH<sub>3-8</sub>).

<sup>13</sup>C NMR (101 MHz, CDCl<sub>3</sub>) δ = 139.5, 129.3, 128.2, 126.7, 61.1, 58.3, 56.7, 35.3, 33.7, 31.4, 22.3, 19.9.

Data for the minor diastereomer:

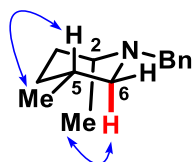

**H-6<sub>ax</sub>** dd, *J* = 11.6, 9.0 Hz

**nOe** correlations shown with solid blue arrows.

<sup>1</sup>H NMR (400 MHz, CDCl<sub>3</sub>) δ = 7.37-7.21 (5H, m, ArH), 3.66-3.46 (2H, m, NCH<sub>2</sub>Ph), 2.81-2.88 (1H, m, CH-2), 2.34 (1H, dd, *J* = 11.6, 4.2 Hz, CH<sub>2-6eq</sub>), 2.17 (1H, dd, *J* = 11.6, 9.0 Hz, CH<sub>2-6ax</sub>), 1.81-1.61 (2H, m, CH<sub>2-4a</sub> and CH-5), 1.55-1.44 (2H, m, CH<sub>2-3a</sub> and CH<sub>2-4b</sub>), 1.30-1.16 (1H, m, CH<sub>2-3b</sub>), 1.01 (3H, d, *J* = 6.6 Hz, CH<sub>3-7</sub>), 0.87 (3H, d, *J* = 6.7 Hz, CH<sub>3-8</sub>).

$^{13}\text{C}$  NMR (101 MHz,  $\text{CDCl}_3$ )  $\delta$  = 140.4, 128.7, 128.2, 126.7, 59.2, 54.7, 52.8, 31.4, 30.8, 28.4, 19.4, 11.9.

***rac*-(2*R*,6*S*)-1-Benzyl-2,6-dimethylpiperidine, 3p**

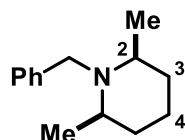

Heptane-2,6-diol<sup>6</sup> *rac*-**2p** (132 mg, 1.0 mmol), anhydrous benzylamine (0.16 mL, 1.5 mmol),  $[\text{IrCp}^*\text{Cl}_2]_2$  (8.0 mg, 1.0 mol%),  $\text{NaHCO}_3$  (1.7 mg, 2.0 mol%) and anhydrous toluene (0.5 mL) were subjected to **general procedure A**. Purification by column chromatography (pentane:Et<sub>2</sub>O 60:40) afforded piperidine **3p** (135 mg, 66%, 80:20 dr) as an orange oil as an inseparable mixture of diastereoisomers. The major diastereomer was identified as *cis* by comparison with literature data.<sup>16</sup>

HRMS: ESI+ found  $[\text{M}+\text{H}]^+ = 207.1747$ ,  $\text{C}_{14}\text{H}_{22}\text{N}$  requires 204.1747,  $\Delta = 0.03$  ppm.

FTIR (film):  $\nu_{\text{max}} = 2927, 1494, 1453, 1374, 1340, 1312, 1201, 1121, 1094, 1056, 1028, 943, 753, 723, 696$   $\text{cm}^{-1}$ .

Data for the major diastereomer:

$^1\text{H}$  NMR (400 MHz,  $\text{CDCl}_3$ )  $\delta$  = 7.42-7.37 (2H, m, ArH), 7.33-7.25 (2H, m, ArH), 7.24-7.18 (1H, m, ArH), 3.82 (2H, s,  $\text{NCH}_2\text{Ph}$ ), 2.54-2.45 (2H, m, 2 x CH-2), 1.69-1.51 (3H, m, 2 x  $\text{CH}_2$ -3<sub>a</sub> and  $\text{CH}_2$ -4<sub>a</sub>), 1.39-1.26 (3H, m, 2 x  $\text{CH}_2$ -3<sub>b</sub> and  $\text{CH}_2$ -4<sub>b</sub>), 1.09 (6H, d,  $J = 6.3$  Hz, 2 x  $\text{CH}_3$ ).

$^{13}\text{C}$  NMR (101 MHz,  $\text{CDCl}_3$ )  $\delta$  = 142.7, 128.7, 128.5, 126.7, 58.0, 54.3, 35.4, 25.0, 22.9.

Data for the minor diastereomer:

$^1\text{H}$  NMR (400 MHz,  $\text{CDCl}_3$ )  $\delta$  = 7.42-7.37 (2H, m, ArH), 7.33-7.25 (2H, m, ArH), 7.24-7.18 (1H, m, ArH), 3.93 (1H, d,  $J = 13.8$  Hz,  $\text{NCH}_{2a}\text{Ph}$ ), 3.42 (1H, d,  $J = 13.9$  Hz,  $\text{NCH}_{2b}\text{Ph}$ ), 2.92-2.82 (2H, m, CH-2 and CH-6), 1.69-1.51 (3H, m, 2 x  $\text{CH}_2$ -3<sub>a</sub> and  $\text{CH}_2$ -4<sub>a</sub>), 1.39-1.26 (3H, m, 2 x  $\text{CH}_2$ -3<sub>b</sub> and  $\text{CH}_2$ -4<sub>b</sub>), 1.02 (6, d,  $J = 6.5$  Hz, 2 x  $\text{CH}_3$ ).

$^{13}\text{C}$  NMR (101 MHz,  $\text{CDCl}_3$ )  $\delta$  = 142.7, 129.0, 128.7, 126.9, 54.0, 50.3, 33.5, 20.1, 16.6.

***N*-Benzyl-4,4-dimethylpiperidine, 3q**

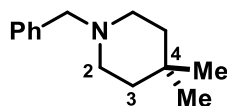

3,3-Dimethylpentane-1,5-diol<sup>6</sup> **2q** (132 mg, 1.0 mmol), anhydrous benzylamine (0.16 mL, 1.5 mmol),  $[\text{IrCp}^*\text{Cl}_2]_2$  (8.0 mg, 1.0 mol%),  $\text{NaHCO}_3$  (1.7 mg, 2.0 mol%) and anhydrous toluene (0.5 mL) were subjected to **general procedure A**. Purification by column chromatography (pentane:Et<sub>2</sub>O 80:20) afforded piperidine **3q** (149 mg, 73%) as a colourless oil.

$^1\text{H}$  NMR (400 MHz,  $\text{CDCl}_3$ )  $\delta$  = 7.35-7.21 (5H, m, ArH), 3.51 (2H, s,  $\text{NCH}_2\text{Ph}$ ), 2.40-2.37 (4H, m,  $2 \times \text{CH}_2\text{-2}$ ), 1.41-1.38 (4H, m,  $2 \times \text{CH}_2\text{-3}$ ), 0.92 (6H, s,  $2 \times \text{CH}_3$ ).

$^{13}\text{C}$  NMR (101 MHz,  $\text{CDCl}_3$ )  $\delta$  = 138.9, 129.4, 128.2, 127.0, 63.7, 50.2, 38.9, 28.6, 28.4 (br).

HRMS: ESI+ found  $[\text{M}+\text{H}]^+$  = 204.1749,  $\text{C}_{14}\text{H}_{22}\text{N}$  requires 204.1747,  $\Delta$  = 0.85 ppm.

FTIR (film):  $\nu_{\text{max}}$  = 2948, 2910, 2803, 2760, 1473, 1454, 1385, 1118, 1028, 988, 919, 736  $\text{cm}^{-1}$ .

### 8-Benzyl-8-azaspiro[4.5]decane, **3r**

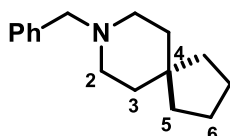

2,2'-(Cyclopentane-1,1-diyl)bis(ethan-1-ol)<sup>6</sup> **2r** (158 mg, 1.0 mmol), anhydrous benzylamine (0.16 mL, 1.5 mmol),  $[\text{IrCp}^*\text{Cl}_2]_2$  (8.0 mg, 1.0 mol%),  $\text{NaHCO}_3$  (1.7 mg, 2.0 mol%) and anhydrous toluene (0.5 mL) were subjected to **general procedure A**. Purification by column chromatography (pentane: $\text{Et}_2\text{O}$ : $\text{Et}_3\text{N}$  79.5:19.5:1) afforded piperidine **3r** (170 mg, 74%) as a pale yellow oil.

$^1\text{H}$  NMR (500 MHz,  $\text{CDCl}_3$ )  $\delta$  = 7.33-7.22 (5H, m, ArH), 3.48 (2H, s,  $\text{NCH}_2\text{Ph}$ ), 2.37 (4H, br. s,  $2 \times \text{CH}_2\text{-2}$ ), 1.59-1.55 (4H, m,  $2 \times \text{CH}_2\text{-6}$ ), 1.49-1.46 (4H, m,  $2 \times \text{CH}_2\text{-3}$ ), 1.41-1.38 (4H, m,  $2 \times \text{CH}_2\text{-5}$ ).

$^{13}\text{C}$  NMR (125 MHz,  $\text{CDCl}_3$ )  $\delta$  = 138.9, 129.4, 128.2, 127.0, 63.8, 51.6, 40.9, 38.2 (br), 37.8, 24.5.

HRMS: ESI+ found  $[\text{M}+\text{H}]^+$  = 230.1905,  $\text{C}_{16}\text{H}_{24}\text{N}$  requires 230.1903,  $\Delta$  = 0.65 ppm.

FTIR (film):  $\nu_{\text{max}}$  = 2940, 2917, 2867, 2801, 2759, 1468, 1366, 1342, 1122, 735, 697  $\text{cm}^{-1}$ .

### 3-Benzyl-3-azaspiro[5.5]undecane, **3s**

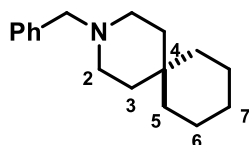

2,2'-(Cyclohexane-1,1-diyl)bis(ethan-1-ol)<sup>6</sup> **2s** (172 mg, 1.0 mmol), anhydrous benzylamine (0.16 mL, 1.5 mmol),  $[\text{IrCp}^*\text{Cl}_2]_2$  (8.0 mg, 1.0 mol%),  $\text{NaHCO}_3$  (1.7 mg, 2.0 mol%) and anhydrous toluene (0.5 mL) were subjected to **general procedure A**. Purification by column chromatography (pentane: $\text{Et}_2\text{O}$  80:20) afforded piperidine **3s** (166 mg, 68%) as a pale yellow solid.

$^1\text{H}$  NMR (500 MHz,  $\text{CDCl}_3$ )  $\delta$  = 7.33-7.22 (5H, m, ArH), 3.50 (2H, s,  $\text{NCH}_2\text{Ph}$ ), 2.37 (4H, t,  $J$  = 5.6 Hz,  $2 \times \text{CH}_2\text{-2}$ ), 1.46 (4H, t,  $J$  = 5.7 Hz,  $2 \times \text{CH}_2\text{-3}$ ), 1.42-1.39 (6H, m,  $2 \times \text{CH}_2\text{-6}$  and  $\text{CH}_2\text{-7}$ ), 1.33-1.31 (4H, m,  $2 \times \text{CH}_2\text{-5}$ ).

$^{13}\text{C}$  NMR (125 MHz,  $\text{CDCl}_3$ )  $\delta$  = 138.8, 129.4, 128.2, 127.0, 63.8, 49.5, 36.8 (br), 36.4, 30.9, 27.0, 21.7.

HRMS: ESI+ found  $[\text{M}+\text{H}]^+$  = 244.2058,  $\text{C}_{17}\text{H}_{26}\text{N}$  requires 244.2060,  $\Delta$  = -0.72 ppm.

FTIR (film):  $\nu_{\text{max}}$  = 2919, 2848, 2802, 2763, 1450, 1125, 987, 914, 736, 697  $\text{cm}^{-1}$ .

Melting point = 44–46 °C.

**(1*S*,6*S*)-3-Benzyl-6-isopropyl-2-methyl-3-azabicyclo[4.1.0]heptane, 3t**

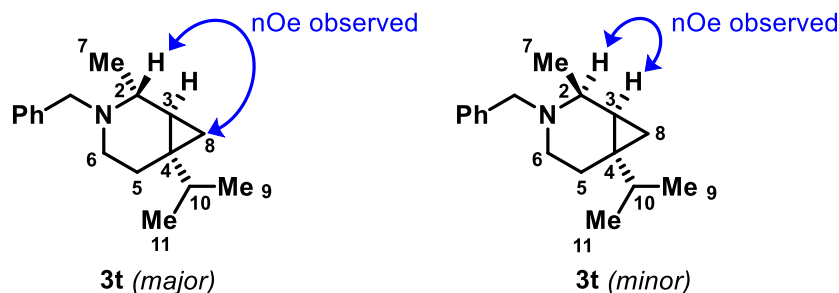

2-((1*S*,2*S*)-2-(1-Hydroxyethyl)-1-isopropylcyclopropyl)ethan-1-ol<sup>6</sup> **2t** (172 mg, 1.0 mmol), anhydrous benzylamine (0.16 mL, 1.5 mmol), [IrCp\*Cl<sub>2</sub>]<sub>2</sub> (8.0 mg, 1.0 mol%), NaHCO<sub>3</sub> (1.7 mg, 2.0 mol%) and anhydrous toluene (0.5 mL) were subjected to **general procedure A**. Purification by column chromatography (pentane:Et<sub>2</sub>O 90:10) afforded piperidine **3t** (174 mg, 71%, 62:38 dr) as an orange oil as an inseparable mixture of diastereoisomers. The relative stereochemistry was assigned by nOe analysis.

FTIR (film):  $\nu_{\max}$  = 3061, 2955, 2793, 1494, 1452, 1365, 1156, 1028, 734, 698 cm<sup>-1</sup>.

HRMS: ESI+ found [M+H]<sup>+</sup> = 244.2060, C<sub>17</sub>H<sub>26</sub>N requires 244.2060,  $\Delta$  = 0.07 ppm.

$[\alpha]_{\text{D}}^{25}$  = +19.8 (*c* = 1.0, CHCl<sub>3</sub>).

Data for the major diastereomer:

<sup>1</sup>H NMR (500 MHz, CDCl<sub>3</sub>)  $\delta$  = 7.34-7.19 (5H, m, ArH), 3.69 (1H, d, *J* = 14.0 Hz, NCH<sub>2a</sub>Ph), 3.34 (d, *J* = 13.9 Hz, NCH<sub>2b</sub>Ph), 2.83 (1H, q, *J* = 6.4 Hz, CH-2), 2.51-2.39 (1H, m, CH<sub>2</sub>-6<sub>a</sub>), 1.95 (1H, ddd, *J* = 12.2, 7.1, 5.3 Hz, CH<sub>2</sub>-6<sub>b</sub>), 1.72-1.59 (1H, m, CH<sub>2</sub>-5<sub>a</sub>), 1.54 (1H, ddd, *J* = 12.8, 6.9, 5.3 Hz, CH<sub>2</sub>-5<sub>b</sub>), 1.24-1.18 (3H, m, CH<sub>3</sub>-7), 1.04-0.81 (7H, m, CH<sub>3</sub>-9, CH-10, CH<sub>3</sub>-11), 0.56-0.49 (2H, m, CH-3 and CH<sub>2</sub>-8<sub>a</sub>), 0.36-0.32 (1H, m, CH<sub>2</sub>-8<sub>b</sub>).

<sup>13</sup>C NMR (125 MHz, CDCl<sub>3</sub>)  $\delta$  = 140.2, 128.5, 128.0, 126.5, 57.6, 54.1, 43.6, 37.5, 25.8, 24.6, 23.6, 19.1, 18.4, 18.1, 16.4.

Data for the minor diastereomer:

<sup>1</sup>H NMR (500 MHz, CDCl<sub>3</sub>)  $\delta$  = 7.34-7.19 (5H, m, ArH), 3.99 (1H, d, *J* = 14.0 Hz, NCH<sub>2a</sub>Ph), 3.04 (d, *J* = 14.0 Hz, NCH<sub>2b</sub>Ph), 2.62 (1H, qd, *J* = 6.0, 4.1 Hz, CH-2), 2.51-2.39 (1H, m, CH<sub>2</sub>-6<sub>eq</sub>), 1.77 (1H, td, *J* = 11.7, 4.6 Hz, CH<sub>2</sub>-6<sub>ax</sub>), 1.72-1.59 (1H, m, CH<sub>2</sub>-5<sub>a</sub>), 1.47-1.39 (1H, m, CH<sub>2</sub>-5<sub>b</sub>), 1.24-1.18 (3H, m, CH<sub>3</sub>-7), 1.04-0.81 (7H, m, CH<sub>3</sub>-9, CH-10, CH<sub>3</sub>-11), 0.71 (1H, ddd, *J* = 9.4, 5.5, 4.3 Hz, CH-3), 0.56-0.49 (1H, m, CH<sub>2</sub>-8<sub>a</sub>), 0.25 (1H, dd, *J* = 9.0, 3.7 Hz, CH<sub>2</sub>-8<sub>b</sub>).

<sup>13</sup>C NMR (125 MHz, CDCl<sub>3</sub>)  $\delta$  = 140.3, 128.6, 128.0, 126.5, 58.5, 53.8, 50.5, 37.8, 26.7, 25.1, 23.5, 20.0, 18.9, 18.2, 14.4.

### 3-Benzyl-3-azabicyclo[3.3.1]nonane, **3u**

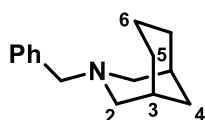

((1*R*,3*S*)-Cyclohexane-1,3-diyl)dimethanol<sup>15</sup> **2u** (144 mg, 1.0 mmol), benzylamine (0.16 mL, 1.5 mmol), [IrCp\*Cl<sub>2</sub>]<sub>2</sub> (8.0 mg, 1.0 mol%), NaHCO<sub>3</sub> (1.7 mg, 2.0 mol%) and anhydrous toluene (0.5 mL) were subjected to **general procedure A**. Purification by column chromatography (pentane:Et<sub>2</sub>O 98:2) afforded piperidine **3u** (162 mg, 75%) as a colourless oil.

<sup>1</sup>H NMR (400 MHz, CDCl<sub>3</sub>) δ = 7.36-7.28 (4H, m, ArH), 7.26-7.20 (1H, m, ArH), 3.37 (2H, s, NCH<sub>2</sub>Ph), 2.88 (2H, d, *J* = 11.3 Hz, 2 x CH<sub>2</sub>-2<sub>a</sub>), 2.74 (1H, qt, *J* = 12.7, 6.1 Hz, CH<sub>2</sub>-5<sub>ax</sub>), 2.22 (2H, d, *J* = 10.9 Hz, 2 x CH<sub>2</sub>-2<sub>b</sub>), 1.83-1.47 (9H, m, 2 x CH-3, CH<sub>2</sub>-4, 2 x CH<sub>2</sub>-5, CH<sub>2</sub>-5<sub>eq</sub>).

<sup>13</sup>C NMR (101 MHz, CDCl<sub>3</sub>) δ = 139.9, 128.7, 128.1, 126.5, 64.2, 59.9, 34.4, 31.5, 29.7, 22.6.

HRMS: ESI+ found [M+H]<sup>+</sup> = 216.1746, C<sub>15</sub>H<sub>22</sub>N requires 216.1747, Δ = -0.32 ppm.

FTIR (film): ν<sub>max</sub> = 3387, 2909, 1644, 1495, 1454, 1391, 1250, 1146, 1073, 1017, 968, 830, 764, 728, 698 cm<sup>-1</sup>.

### (1*R*,5*S*)-3-Benzyl-1,8,8-trimethyl-3-azabicyclo[3.2.1]octane, **3v**

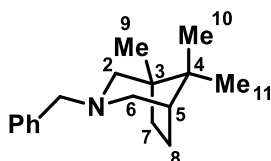

((1*R*,3*S*)-1,2,2-Trimethylcyclopentane-1,3-diyl)dimethanol<sup>6</sup> **2v** (172 mg, 1.0 mmol), benzylamine (0.16 mL, 1.5 mmol), [IrCp\*Cl<sub>2</sub>]<sub>2</sub> (8.0 mg, 1.0 mol%), NaHCO<sub>3</sub> (1.7 mg, 2.0 mol%) and anhydrous toluene (0.5 mL) were subjected to **general procedure A**. Purification by column chromatography (pentane:Et<sub>2</sub>O 90:10) afforded piperidine **3v** (163 mg, 67%) as a yellow oil.

<sup>1</sup>H NMR (400 MHz, CDCl<sub>3</sub>) δ = 7.36-7.20 (5H, m, ArH), 3.55 (2H, s, NCH<sub>2</sub>Ph), 2.59 (1H, dd, *J* = 10.5, 2.3 Hz, CH<sub>2</sub>-6<sub>a</sub>), 2.45 (1H, dd, *J* = 10.5, 3.7 Hz, CH<sub>2</sub>-6<sub>b</sub>), 2.35 (1H, d, *J* = 10.5 Hz, CH<sub>2</sub>-2<sub>a</sub>), 2.17 (1H, d, *J* = 10.5 Hz, CH<sub>2</sub>-2<sub>b</sub>), 1.84-1.65 (3H, m, CH<sub>2</sub>-7<sub>a</sub> and CH<sub>2</sub>-8), 1.61-1.49 (2H, m, CH<sub>2</sub>-7<sub>b</sub> and CH-5), 0.91 (3H, s, CH<sub>3</sub>-11), 0.86 (3H, s, CH<sub>3</sub>-10), 0.76 (3H, s, CH<sub>3</sub>-9).

<sup>13</sup>C NMR (101 MHz, CDCl<sub>3</sub>) δ = 139.9, 128.6, 128.1, 126.6, 61.9, 61.2, 54.6, 46.1, 42.8, 41.7, 35.6, 26.8, 24.4, 18.3, 17.9.

HRMS: ESI+ found [M+H]<sup>+</sup> = 244.2058, C<sub>17</sub>H<sub>26</sub>N requires 244.2060, Δ = -0.87 ppm.

FTIR (film): ν<sub>max</sub> = 2952, 2803, 1653, 1454, 1366, 1343, 1276, 1097, 1028, 799, 746, 727, 698 cm<sup>-1</sup>.

[α]<sub>D</sub><sup>25</sup> = +37.5 (*c* = 1.0, CHCl<sub>3</sub>).



### **N-Methyl-1-(4-(trifluoromethyl)benzyl)piperidine, 3w**

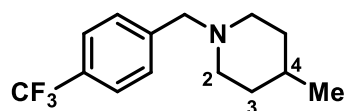

3-Methylpentane-1,5-diol **2a** (118 mg, 1.0 mmol), *p*-(trifluoromethyl)benzylamine (0.21 mL, 1.5 mmol), [IrCp\*Cl<sub>2</sub>]<sub>2</sub> (8.0 mg, 1.0 mol%), NaHCO<sub>3</sub> (1.7 mg, 2.0 mol%) and anhydrous toluene (0.5 mL) were subjected to **general procedure A**. Purification by column chromatography (pentane:Et<sub>2</sub>O 90:10) afforded piperidine **3w** (220 mg, 86%) as a pale yellow oil.

<sup>1</sup>H NMR (400 MHz, CDCl<sub>3</sub>) δ = 7.57-7.54 (2H, m, ArH), 7.45-7.42 (2H, m, ArH), 3.52 (2H, s, NCH<sub>2</sub>Ph), 2.83-2.78 (2H, m, 2 × CH<sub>2</sub>-2<sub>eq</sub>), 1.95 (2H, td, *J* = 11.5, 2.5 Hz, 2 × CH<sub>2</sub>-2<sub>ax</sub>), 1.63-1.57 (2H, m, 2 × CH<sub>2</sub>-3<sub>a</sub>), 1.42-1.31 (1H, m, CH-4), 1.29-1.19 (2H, m, 2 × CH<sub>2</sub>-3<sub>b</sub>), 0.92 (3H, d, *J* = 6.4 Hz, CH<sub>3</sub>).

<sup>13</sup>C NMR (101 MHz, CDCl<sub>3</sub>) δ = 143.4, 129.3, 129.2 (q, *J* = 32.4 Hz), 125.2 (q, *J* = 3.9 Hz), 124.5 (q, *J* = 271.7 Hz), 63.1, 54.2, 34.5, 30.9, 22.1.

<sup>19</sup>F NMR (376 MHz, CDCl<sub>3</sub>) δ = -62.3.

HRMS: ESI+ found [M+H]<sup>+</sup> = 258.1466, C<sub>14</sub>H<sub>19</sub>F<sub>3</sub>N requires 258.1475, Δ = -3.61 ppm.

FTIR (film): ν<sub>max</sub> = 2924, 2797, 1324, 1161, 1123, 1102, 1066, 847, 812 cm<sup>-1</sup>.

### **N-(4-Fluorobenzyl)-4-phenylpiperidine, 3x**

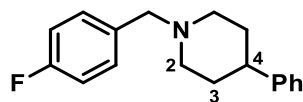

3-Phenylpentane-1,5-diol<sup>6</sup> **2b** (180 mg, 1.0 mmol), *p*-fluorobenzylamine (0.17 mL, 1.5 mmol), [IrCp\*Cl<sub>2</sub>]<sub>2</sub> (8.0 mg, 1.0 mol%), NaHCO<sub>3</sub> (1.7 mg, 2.0 mol%) and anhydrous toluene (0.5 mL) were subjected to **general procedure A**. Purification by column chromatography (pentane:Et<sub>2</sub>O 90:10 → 80:20) afforded piperidine **3x** (167 mg, 62%) as a colourless solid.

<sup>1</sup>H NMR (400 MHz, CDCl<sub>3</sub>) δ = 7.34-7.28 (4H, m, ArH), 7.25-7.18 (3H, m, ArH), 7.05-6.99 (2H, m, ArH), 3.52 (2H, s, NCH<sub>2</sub>Ar), 3.02-2.97 (2H, m, 2 × CH<sub>2</sub>-2<sub>a</sub>), 2.56-2.45 (1H, m, CH-4), 2.12-2.05 (2H, m, 2 × CH<sub>2</sub>-2<sub>b</sub>), 1.85-1.72 (4H, m, 2 × CH<sub>2</sub>-3).

<sup>13</sup>C NMR (126 MHz, CDCl<sub>3</sub>) δ = 163.1 (d, *J* = 244.6 Hz), 146.6, 134.3 (d, *J* = 3.0 Hz), 130.8 (d, *J* = 8.0 Hz), 128.5, 127.0, 126.2, 115.1 (d, *J* = 21.1 Hz), 62.8, 54.4, 42.8, 33.6.

<sup>19</sup>F NMR (376 MHz, CDCl<sub>3</sub>) δ = -116.13.

HRMS: ESI+ found [M+H]<sup>+</sup> = 270.1651, C<sub>18</sub>H<sub>21</sub>FN requires 270.1653, Δ = -0.67 ppm.

FTIR (film): ν<sub>max</sub> = 2936, 2795, 2756, 1603, 1507, 1221, 1154, 1090, 992, 835, 755, 699 cm<sup>-1</sup>.

Melting point = 69–70 °C.

### ***N*-(4-Methoxybenzyl)-4-phenylpiperidine, 3y**

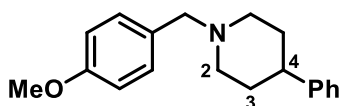

3-Phenylpentane-1,5-diol<sup>6</sup> **2b** (180 mg, 1.0 mmol), *para*-methoxybenzylamine (0.20 mL, 1.5 mmol), [IrCp\*Cl<sub>2</sub>]<sub>2</sub> (8.0 mg, 1.0 mol%), NaHCO<sub>3</sub> (1.7 mg, 2.0 mol%) and anhydrous toluene (0.5 mL) were subjected to **general procedure A**. Purification by column chromatography (pentane:Et<sub>2</sub>O 60:40) afforded piperidine **3y** (95 mg, 34%) as a colourless oil.

<sup>1</sup>H NMR (400 MHz, CDCl<sub>3</sub>) δ = 7.30-7.15 (7H, m, ArH), 6.88-6.84 (2H, m, ArH), 3.80 (3H, s, OCH<sub>3</sub>), 3.48 (2H, s, NCH<sub>2</sub>Ph), 3.02-2.97 (2H, m, 2 × CH<sub>2</sub>-2<sub>a</sub>), 2.51-2.44 (1H, m, CH-4), 2.08-2.02 (2H, m, 2 × CH<sub>2</sub>-2<sub>b</sub>), 1.81-1.76 (4H, m, 2 × CH<sub>2</sub>-3).

<sup>13</sup>C NMR (125 MHz, CDCl<sub>3</sub>) δ = 158.8, 146.7, 130.6, 130.6, 128.5, 127.0, 126.2, 113.7, 63.0, 55.4, 54.3, 42.9, 33.7.

HRMS: ESI+ found [M+H]<sup>+</sup> = 282.1847, C<sub>19</sub>H<sub>24</sub>NO requires 282.1852, Δ = -1.76 ppm.

FTIR (film): ν<sub>max</sub> = 2933, 2796, 2754, 1611, 1510, 1453, 1243, 833, 757, 699 cm<sup>-1</sup>.

### ***N*-(Naphthalen-1-ylmethyl)-4-phenylpiperidine, 3z**

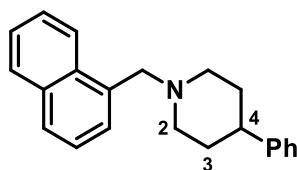

3-Phenylpentane-1,5-diol<sup>6</sup> **2b** (180 mg, 1.0 mmol), 1-naphthylethylamine (0.22 mL, 1.5 mmol), [IrCp\*Cl<sub>2</sub>]<sub>2</sub> (8.0 mg, 1.0 mol%), NaHCO<sub>3</sub> (1.7 mg, 2.0 mol%) and anhydrous toluene (0.5 mL) were subjected to **general procedure A**. Purification by column chromatography (pentane:Et<sub>2</sub>O 95:5) afforded piperidine **3z** (137 mg, 45%) as a colourless solid.

<sup>1</sup>H NMR (400 MHz, CDCl<sub>3</sub>) δ = 8.38-8.36 (1H, m, ArH), 7.87 (1H, d, *J* = 7.8 Hz, ArH), 7.79 (1H, d, *J* = 7.8 Hz, ArH), 7.57-7.42 (4H, m, ArH), 7.32-7.17 (5H, m, ArH), 3.96 (2H, s, NCH<sub>2</sub>Ar), 3.09 (2H, dt, *J* = 11.0, 3.6 Hz, 2 × CH<sub>2</sub>-2<sub>eq</sub>), 2.55 (1H, tt, *J* = 10.8, 5.6 Hz, CH-4), 2.23-2.16 (2H, m, 2 × CH<sub>2</sub>-2<sub>ax</sub>), 1.85-1.74 (4H, m, 2 × CH<sub>2</sub>-3).

<sup>13</sup>C NMR (101 MHz, CDCl<sub>3</sub>) δ = 146.8, 134.8, 134.0, 132.8, 128.52, 128.48, 127.9, 127.4, 127.0, 126.2, 125.8, 125.7, 125.3, 125.0, 61.6, 54.8, 43.0, 33.8.

HRMS: ESI+ found [M+H]<sup>+</sup> = 302.1901, C<sub>22</sub>H<sub>24</sub>N requires 302.1903, Δ = -0.67 ppm.

FTIR (film): ν<sub>max</sub> = 1598, 1493, 1452, 1365, 1334, 1167, 1108, 988, 784, 699 cm<sup>-1</sup>.

Melting point = 106–107 °C.

#### 4-Phenyl-*N*-(1-phenylethyl)piperidine, **3aa**

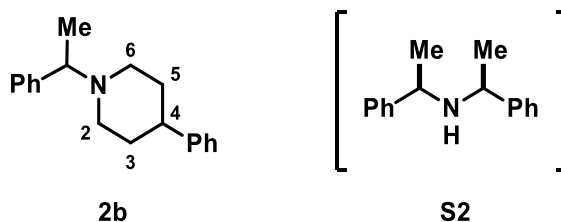

3-Phenylpentane-1,5-diol<sup>6</sup> **2b** (180 mg, 1.0 mmol),  $\alpha$ -methylbenzylamine (0.19 mL, 1.5 mmol), [IrCp\*Cl<sub>2</sub>]<sub>2</sub> (8.0 mg, 1.0 mol%), NaHCO<sub>3</sub> (1.7 mg, 2.0 mol%) and anhydrous toluene (0.5 mL) were subjected to **general procedure A**. Purification by column chromatography (pentane:Et<sub>2</sub>O 60:40) afforded piperidine **3aa** (184 mg, 65%) contaminated with 8% *meso*-bis(1-phenylethyl)amine **S2** as a yellow oil.

#### Data for **3aa**:

<sup>1</sup>H NMR (400 MHz, CDCl<sub>3</sub>)  $\delta$  = 7.33-7.05 (10H, m, ArH), 3.40 (1H, q,  $J$  = 6.8 Hz, NCH(CH<sub>3</sub>)Ph), 3.11 (1H, dtd,  $J$  = 11.1, 3.5, 2.1 Hz, CH<sub>2</sub>-2<sub>eq</sub>), 2.86 (1H, dtd,  $J$  = 11.3, 3.4, 2.0, CH<sub>2</sub>-6<sub>eq</sub>), 2.40-2.32 (1H, m, CH-4), 2.06-1.97 (1H, m, CH<sub>2</sub>-2<sub>ax</sub>), 1.88 (1H, td,  $J$  = 11.2, 3.4 Hz, CH<sub>2</sub>-6<sub>ax</sub>), 1.81-1.51 (4H, m, CH<sub>2</sub>-3 and CH<sub>2</sub>-5), 1.34 (3H, d,  $J$  = 6.5 Hz, CH<sub>3</sub>).

<sup>13</sup>C NMR (125 MHz, CDCl<sub>3</sub>)  $\delta$  = 146.8, 144.0, 128.5, 128.1, 127.8, 126.9, 126.8, 126.0, 65.1, 51.4, 51.3, 43.1, 33.9, 33.8, 19.7.

HRMS: ESI+ found [M+H]<sup>+</sup> = 266.1904, C<sub>19</sub>H<sub>24</sub>N requires 266.1903,  $\Delta$  = 0.27 ppm.

FTIR (film):  $\nu_{\max}$  = 3026, 2932, 2796, 1493, 1451, 1129, 1022, 756, 699 cm<sup>-1</sup>.

#### Data for **S2**:

<sup>1</sup>H NMR (400 MHz, CDCl<sub>3</sub>)  $\delta$  = 3.69 (2H, q,  $J$  = 6.5 Hz, NCH(CH<sub>3</sub>)Ph), 1.28 (6H, d,  $J$  = 6.6 Hz, CH<sub>3</sub>).

<sup>13</sup>C NMR (125 MHz, CDCl<sub>3</sub>)  $\delta$  = 146.1, 128.6, 127.0, 126.7, 55.0, 23.3.

*The data are consistent with the literature.*<sup>17</sup>

#### 4-Phenyl-*N*-(2-phenylpropan-2-yl)piperidine, **3ab**

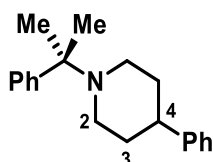

3-Phenylpentane-1,5-diol<sup>6</sup> **2b** (180 mg, 1.0 mmol), cumylamine (0.22 mL, 1.5 mmol), [IrCp\*Cl<sub>2</sub>]<sub>2</sub> (8.0 mg, 1.0 mol%), NaHCO<sub>3</sub> (1.7 mg, 2.0 mol%) and anhydrous toluene (0.5 mL) were subjected to **general procedure A**. Purification by column chromatography (pentane:Et<sub>2</sub>O 95:5) afforded piperidine **3ab** (185 mg, 66%) as a colourless solid.

$^1\text{H}$  NMR (400 MHz,  $\text{CDCl}_3$ )  $\delta$  = 7.60-7.57 (2H, m, ArH), 7.35-7.17 (8H, m, ArH), 2.95-2.93 (2H, m,  $2 \times \text{CH}_2\text{-2}_{\text{eq}}$ ), 2.47 (1H, tt,  $J$  = 11.8, 4.3 Hz,  $\text{CH-4}_{\text{ax}}$ ), 2.22 (2H, td,  $J$  = 11.4, 2.7 Hz,  $2 \times \text{CH}_2\text{-2}_{\text{ax}}$ ), 1.82-1.68 (4H, m,  $2 \times \text{CH}_2\text{-3}$ ), 1.39 (6H, s,  $2 \times \text{CH}_3$ ).

$^{13}\text{C}$  NMR (101 MHz,  $\text{CDCl}_3$ )  $\delta$  = 150.0, 147.1, 128.5, 128.1, 127.1, 126.2, 126.13, 126.08, 60.1, 47.3, 43.5, 34.6, 24.5.

HRMS: ESI+ found  $[\text{M}+\text{H}]^+ = 280.2060$ ,  $\text{C}_{20}\text{H}_{26}\text{N}$  requires 280.2060,  $\Delta = 0.17$  ppm.

FTIR (film):  $\nu_{\text{max}} = 2972, 2930, 1493, 1446, 1271, 1177, 1073, 1024, 959, 759, 698 \text{ cm}^{-1}$ .

Melting point = 101–102 °C.

### (2*S*,4*S*)-1-Benzyl-2-methyl-4-phenylpiperidine, (+)-**3ac**

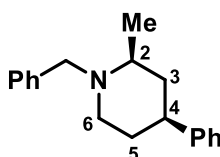

(3*S*)-3-Phenylhexane-1,5-diol<sup>6</sup> (–)-**2ac** (110 mg, 0.56 mmol, 60:40 d.r., >99:1 e.r.), anhydrous benzylamine (0.09 mL, 0.84 mmol),  $[\text{IrCp}^*\text{Cl}_2]_2$  (4.5 mg, 1.0 mol%),  $\text{NaHCO}_3$  (0.9 mg, 2.0 mol%) and anhydrous toluene (0.28 mL, 2 M) were subjected to **general procedure A**. Purification by column chromatography afforded piperidine (+)-**3ac** as a colourless oil as an inseparable mixture of diastereoisomers (169 mg, 64%, 80:20 d.r., >99:1 e.r.). The corresponding racemic piperidine *rac*-**3ac** was prepared by an identical procedure starting from *rac*-**2ac**.<sup>6</sup> The enantiomeric purity was determined by chiral HPLC analysis after conversion to the corresponding benzyl carbamate (see below).

HRMS: ESI+ found  $[\text{M}+\text{H}]^+ = 266.1902$ ,  $\text{C}_{19}\text{H}_{24}\text{N}$  requires 266.1903,  $\Delta = -0.32$  ppm.

FTIR (film):  $\nu_{\text{max}} = 3027, 2931, 2790, 1602, 1494, 1451, 1374, 1329, 1137, 1066, 1028, 756, 732, 698 \text{ cm}^{-1}$ .

$[\alpha]_{\text{D}}^{25} = +45.3$  ( $c = 1.00$ ,  $\text{CH}_2\text{Cl}_2$ ).

Data for the major diastereomer:

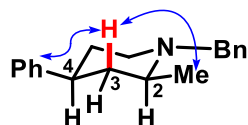

**H-3<sub>ax</sub>** td,  $J = 12.8, 10.9$  Hz  
**nOe** correlations shown with solid blue arrows.

$^1\text{H}$  NMR (500 MHz,  $\text{CDCl}_3$ )  $\delta$  = 7.38-7.17 (10H, m, ArH), 4.17 (1H, d,  $J = 13.4$  Hz,  $\text{NCH}_2\text{aPh}$ ), 3.21 (1H, d,  $J = 13.3$  Hz,  $\text{NCH}_2\text{bPh}$ ), 2.94 (1H, dt,  $J = 11.7, 3.4$  Hz,  $\text{CH}_2\text{-6}_{\text{eq}}$ ), 2.58 (1H, tt,  $J = 12.0, 4.1$  Hz,  $\text{CH-4}_{\text{ax}}$ ), 2.37 (1H, dqd,  $J = 12.1, 5.9, 2.6$  Hz,  $\text{CH-2}_{\text{ax}}$ ), 2.07 (1H, td,  $J = 11.6, 3.4$  Hz,  $\text{CH}_2\text{-6}_{\text{ax}}$ ), 1.87-1.82 (1H, m,  $\text{CH}_2\text{-3}_{\text{eq}}$ ), 1.78-1.65 (2H, m,  $\text{CH}_2\text{-5}$ ), 1.60 (1H, td,  $J = 12.8, 10.9$  Hz,  $\text{CH}_2\text{-3}_{\text{ax}}$ ), 1.28 (3H, d,  $J = 6.1$  Hz,  $\text{CH}_3$ ).

$^{13}\text{C}$  NMR (126 MHz,  $\text{CDCl}_3$ )  $\delta$  = 146.6, 139.3, 129.4, 128.5, 128.3, 126.94, 126.89, 126.2, 58.2, 57.3, 53.4, 43.2, 43.1, 33.5, 21.5.

Data for the minor diastereomer:

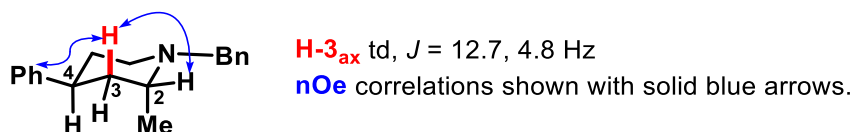

$^1\text{H}$  NMR (500 MHz,  $\text{CDCl}_3$ )  $\delta$  = 7.39 (2H, d,  $J$  = 7.5 Hz, ArH), 7.34-7.17 (8H, m, ArH), 3.70-3.54 (2H, m,  $\text{NCH}_2\text{Ph}$ ), 3.24-3.19 (1H, m,  $\text{CH}_2\text{-eq}$ ), 2.88-2.81 (1H, m,  $\text{CH}_2\text{-ax}$ ), 2.64-2.61 (2H, m,  $\text{CH}_2\text{-6}$ ), 2.03 (1H, td,  $J$  = 12.7, 4.8 Hz,  $\text{CH}_2\text{-3}_{\text{ax}}$ ), 1.78-1.74 (2H, m,  $\text{CH}_2\text{-5}$ ), 1.68 (1H, dt,  $J$  = 12.9, 3.1 Hz,  $\text{CH}_2\text{-3}_{\text{eq}}$ ), 1.12 (3H, d,  $J$  = 6.7 Hz,  $\text{CH}_3$ ).

$^{13}\text{C}$  NMR (126 MHz,  $\text{CDCl}_3$ )  $\delta$  = 146.9, 140.0, 128.8, 128.5, 128.3, 127.1, 126.9, 126.1, 59.3, 52.2, 45.8, 39.5, 36.6, 33.6, 10.0.

### Benzyl (2*S*,4*S*)-2-methyl-4-phenylpiperidine-1-carboxylate, **S3**

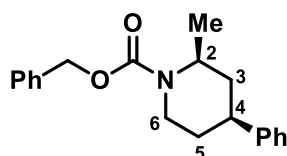

(2*S*,4*S*)-1-Benzyl-2-methyl-4-phenylpiperidine (+)-**3ac** (30 mg, 0.11 mmol, 80:20 d.r.) and benzyl chloroformate (3 M in toluene, 0.23 mL, 0.68 mmol) were subjected to **general procedure C**. Purification by column chromatography (80:20 pentane:Et<sub>2</sub>O) afforded Cbz-piperidine **S3** (34 mg, 97%, 76:24 dr, >99:1 e.r.) as a colourless oil. The corresponding racemic piperidine *rac*-**S3** was prepared by an identical procedure starting from *rac*-**3ac**.

$^1\text{H}$  NMR (400 MHz,  $\text{CDCl}_3$ )  $\delta$  = 7.42 – 7.17 (10H, m, ArH), 5.21 – 5.13 (2H, m,  $\text{NCH}_2\text{Ph}$ ), 4.05 (1H, dp,  $J$  = 10.2, 6.4 Hz,  $\text{CH}_2$ ), 3.89 (1H, dddd,  $J$  = 13.9, 7.6, 3.3, 0.7 Hz,  $\text{CH}_2\text{-6}_a$ ), 3.34 (1H, ddd,  $J$  = 13.9, 9.8, 6.4 Hz,  $\text{CH}_2\text{-6}_b$ ), 2.77 (1H, dddd,  $J$  = 12.9, 10.4, 7.6, 3.3 Hz,  $\text{CH}_2\text{-4}$ ), 2.18 (1H, dtd,  $J$  = 13.5, 9.9, 7.6, 1.4 Hz,  $\text{CH}_2\text{-5}_a$ ), 1.94 (1H, dddd,  $J$  = 13.5, 6.3, 3.3, 1.4 Hz,  $\text{CH}_2\text{-3}_a$ ), 1.74 – 1.55 (2H, m,  $\text{CH}_2\text{-3}_b$  and  $\text{CH}_2\text{-5}_b$ ), 1.24 (3H, d,  $J$  = 6.4 Hz,  $\text{CH}_3$ ). The minor diastereoisomer displays diagnostic signals at  $\delta$  = 4.72 – 4.55 (1H, m,  $\text{CH}_2$ ), 4.30 – 4.10 (1H, m,  $\text{CH}_2\text{-6}_a$ ), 3.15 – 3.01 (1H, m,  $\text{CH}_2\text{-6}_b$ ), 2.98 – 2.85 (1H, m,  $\text{CH}_2\text{-4}$ ).

$^{13}\text{C}$  NMR (101 MHz,  $\text{CDCl}_3$ )  $\delta$  = 155.8, 145.8, 137.1, 128.5, 128.5, 127.9, 127.8, 126.8, 126.2, 66.8, 50.5, 38.0, 38.0, 37.0, 31.2, 19.9.

HRMS: ESI+ found  $[\text{M}+\text{Na}]^+$  = 332.1620,  $\text{C}_{20}\text{H}_{23}\text{O}_2\text{NNa}$  requires 332.1621,  $\Delta$  = -0.16 ppm.

FTIR (film):  $\nu_{\text{max}}$  = 2970, 1696, 1454, 1421, 1334, 1281, 1243, 1212, 1140, 1066, 1029, 757, 699  $\text{cm}^{-1}$ .

$[\alpha]_{\text{D}}^{25}$  = +42.1 ( $c$  = 1.0,  $\text{CHCl}_3$ ).

HPLC: Enantiomeric excess was determined by HPLC with a Chiralpak® IA column (99.5:0.5 hexane:IPA, 1.0 mL min<sup>-1</sup>, 210 nm, room temperature), major diastereomer t<sub>r</sub> (major) = 42.1 min, t<sub>r</sub> (minor) = 47.2 min, >99:1 er; minor diastereomer t<sub>r</sub> (major) = 44.2 min, t<sub>r</sub> (minor) = 52.4 min; >99:1 er.

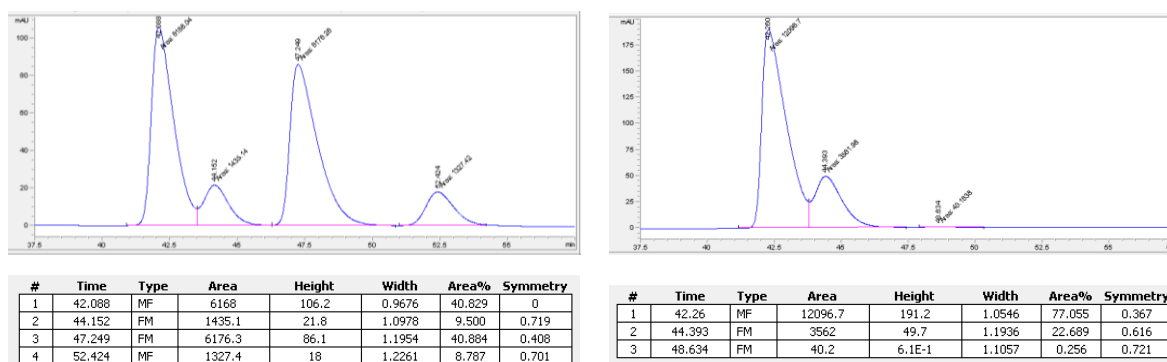

### (S)-1-Benzyl-3-methylpiperidine, (+)-**3i**

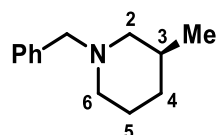

(S)-2-Methylpentane-1,5-diol<sup>6</sup> (–)-**2i** (132 mg, 1.0 mmol, >99:1 er), anhydrous benzylamine (0.16 mL, 1.5 mmol), [IrCp\*Cl<sub>2</sub>]<sub>2</sub> (8.0 mg, 1.0 mol%) and deionised water (0.5 mL) were subjected to **general procedure B** at 80 °C. Purification by column chromatography (pentane:Et<sub>2</sub>O 90:10) afforded piperidine (+)-**3i** (136 mg, 72%, 90:10 er) as a colourless oil. The spectral data was identical to that of the corresponding racemate described above.

$[\alpha]_D^{25} = +8.9$  (*c* = 1.0, CHCl<sub>3</sub>).

The enantiomeric purity was determined by chiral HPLC analysis after conversion to the corresponding benzyl carbamate (see below).

### Benzyl (S)-3-methylpiperidine-1-carboxylate, **S4**

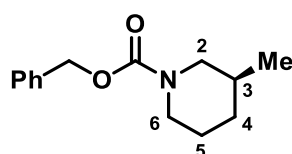

(S)-1-Benzyl-3-methylpiperidine (+)-**3i** (26 mg, 0.14 mmol) and benzyl chloroformate (3 M in toluene, 0.5 mL, 1.5 mmol) were subjected to **general procedure C**. Purification by column chromatography (75:25 pentane:Et<sub>2</sub>O) afforded piperidine **S4** (27 mg, 82%, 90:10 er) as a colourless oil. The

corresponding racemic Cbz-piperidine *rac*-**54** was prepared by an identical procedure starting from *rac*-**3i**.

$^1\text{H}$  NMR (400 MHz,  $\text{CDCl}_3$ , 298 K)  $\delta$  = 7.36-7.28 (5H, m, ArH), 5.13 (2H, s,  $\text{OCH}_2\text{Ph}$ ), 4.10-4.02 (1H, m,  $\text{CH}_2\text{-6}_{\text{eq}}$ ), 3.99-3.92 (1H, m,  $\text{CH}_2\text{-2}_a$ ), 2.76 (1H, td,  $J$  = 12.9, 3.0 Hz,  $\text{CH}_2\text{-6}_{\text{ax}}$ ), 2.50-2.36 (1H, m,  $\text{CH}_2\text{-2}_b$ ), 1.82-1.75 (1H, m,  $\text{CH}_2\text{-4}_a$ ), 1.66-1.54 (2H, m,  $\text{CH}_2\text{-5}_a$  and CH-3), 1.49-1.40 (1H, m,  $\text{CH}_2\text{-5}_b$ ) 1.11-1.01 (1H, m,  $\text{CH}_2\text{-4}_b$ ), 0.88 (3H, d,  $J$  = 6.6 Hz,  $\text{CH}_3$ ).

$^{13}\text{C}$  NMR (101 MHz,  $\text{CDCl}_3$ , 298 K)  $\delta$  = 155.4, 137.2, 128.6, 128.0, 127.9, 67.0, 51.5, 44.5, 33.1, 31.1, 25.3 (br), 19.0.

*The data are consistent with the literature.*<sup>18</sup>

$^1\text{H}$  NMR (500 MHz,  $d_8$ -toluene, 363 K)  $\delta$  = 5.11-5.06 (2H, m,  $\text{OCH}_2\text{Ph}$ ), 3.97-3.92 (2H, m,  $\text{CH}_2\text{-2}_{\text{eq}}$  and  $\text{CH}_2\text{-6}_{\text{eq}}$ ), 2.55 (1H, ddd,  $J$  = 13.1, 11.2, 3.5 Hz,  $\text{CH}_2\text{-6}_{\text{ax}}$ ), 2.25 (1H, dd,  $J$  = 13.0, 10.1 Hz,  $\text{CH}_2\text{-2}_{\text{ax}}$ ), 1.45-1.41 (1H, m,  $\text{CH}_2\text{-4}_a$ ), 1.37-1.16 (3H, m, CH-3,  $\text{CH}_2\text{-5}$ ), 0.78-0.70 (1H, m,  $\text{CH}_2\text{-4}_b$ ), 0.63 (3H, d,  $J$  = 6.6 Hz,  $\text{CH}_3$ ). *Signals corresponding to the aromatic protons are obscured by the  $d_8$ -toluene solvent signals. The aromatic signals can be clearly observed in the room temperature  $\text{CDCl}_3$  data above.*

$^{13}\text{C}$  NMR (125 MHz,  $d_8$ -toluene, 363 K)  $\delta$  = 155.3, 138.3, 128.6, 128.3, 128.0, 67.1, 51.8, 44.8, 33.4, 31.2, 25.4, 18.8.

HRMS: ESI+ found  $[\text{M}+\text{H}]^+ = 234.1491$ ,  $\text{C}_{14}\text{H}_{20}\text{NO}_2$  requires 234.1489,  $\Delta = 1.08$  ppm.

FTIR (film):  $\nu_{\text{max}} = 2929, 2852, 1697, 1428, 1257, 1235, 1154, 1097, 972$   $\text{cm}^{-1}$ .

$[\alpha]_{\text{D}}^{25} = +19.1$  ( $c = 1.7$ ,  $\text{CHCl}_3$ ).

HPLC: Enantiomeric excess was determined by HPLC with a Chiralpak<sup>®</sup> IC column (99:1 hexane:IPA, 0.7 mL  $\text{min}^{-1}$ , 210 nm, room temperature):

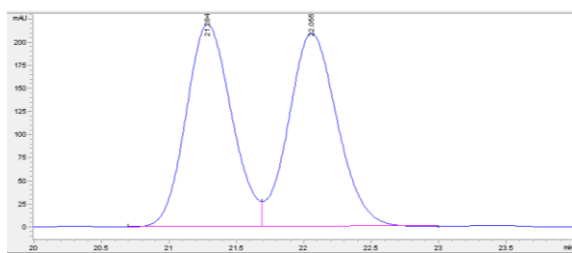

| # | Time   | Type | Area   | Height | Width  | Area%  | Symmetry |
|---|--------|------|--------|--------|--------|--------|----------|
| 1 | 21.284 | BV   | 5151.3 | 218.6  | 0.3669 | 49.503 | 0.863    |
| 2 | 22.055 | VB   | 5254.7 | 209.2  | 0.387  | 50.497 | 0.859    |

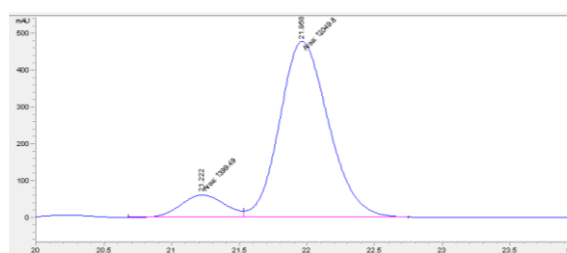

| # | Time   | Type | Area    | Height | Width  | Area%  | Symmetry |
|---|--------|------|---------|--------|--------|--------|----------|
| 1 | 21.222 | MF   | 1399.5  | 61.2   | 0.3808 | 10.406 | 0.927    |
| 2 | 21.958 | MF   | 12049.8 | 479.4  | 0.4189 | 89.594 | 0.815    |

### (S)-3-Methyl-1-(4-(trifluoromethyl)benzyl)piperidine, (+)-**3ad**

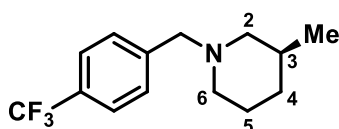

(S)-2-Methylhexane-1,5-diol<sup>6</sup> **2i** (118 mg, 1.0 mmol, >99:1 er), *para*-(trifluoromethyl)benzylamine (0.21 mL, 1.5 mmol), [IrCp\*Cl<sub>2</sub>]<sub>2</sub> (8.0 mg, 1.0 mol%) and deionised water (0.5 mL) were subjected to **general procedure B** at 80 °C. Purification by column chromatography (pentane:Et<sub>2</sub>O 90:10) afforded piperidine (+)-**3ad** (166 mg, 65%, 91:9 er) as a colourless oil.

<sup>1</sup>H NMR (400 MHz, CDCl<sub>3</sub>) δ = 7.57-7.55 (2H, m, ArH), 7.45-7.43 (2H, m, ArH), 3.51 (2H, s, NCH<sub>2</sub>Ph), 2.79-2.71 (2H, m, CH<sub>2</sub>-2<sub>a</sub> and CH<sub>2</sub>-6<sub>eq</sub>), 1.89 (1H, td, *J* = 11.1, 3.4 Hz, CH<sub>2</sub>-6<sub>ax</sub>), 1.73-1.51 (5H, m, CH<sub>2</sub>-2<sub>b</sub>, CH-3, CH<sub>2</sub>-4<sub>a</sub>, CH<sub>2</sub>-5), 0.92-0.84 (1H, m, CH<sub>2</sub>-4<sub>b</sub>), 0.84 (3H, d, *J* = 6.3 Hz, CH<sub>3</sub>).

<sup>13</sup>C NMR (101 MHz, CDCl<sub>3</sub>) δ = 143.4, 129.3, 129.2 (q, *J* = 32.4 Hz), 125.2 (q, *J* = 3.8 Hz), 124.5 (q, *J* = 272.1 Hz), 63.2, 62.2, 54.2, 33.1, 31.3, 25.7, 19.8.

<sup>19</sup>F NMR (376 MHz, CDCl<sub>3</sub>) δ = -62.3.

HRMS: ESI+ found [M+H]<sup>+</sup> = 258.1463, C<sub>14</sub>H<sub>19</sub>F<sub>3</sub>N requires 258.1464, Δ = -0.31 ppm.

FTIR (film): ν<sub>max</sub> = 2930, 1323, 1162, 1123, 1103, 1066, 1019, 836, 819 cm<sup>-1</sup>.

[α]<sub>D</sub><sup>25</sup> = +6.7 (*c* = 1.0, CHCl<sub>3</sub>).

HPLC: Enantiomeric excess was determined by chiral HPLC analysis of the corresponding *N*-Cbz compound **S4** (synthesised using **general procedure C**, analytic sample isolated by preparative TLC. For full characterisation data for this compound, see **S4**, page S31). Chiralpak<sup>®</sup> IC column (99:1 hexane:IPA, 0.7 mL min<sup>-1</sup>, 210 nm, room temperature):

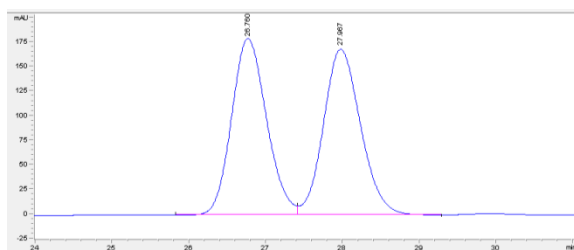

| # | Time   | Type | Area   | Height | Width  | Area%  | Symmetry |
|---|--------|------|--------|--------|--------|--------|----------|
| 1 | 26.76  | BV   | 5692.6 | 179.6  | 0.4918 | 50.131 | 0.842    |
| 2 | 27.967 | VB   | 5662.9 | 168.7  | 0.5197 | 49.869 | 0.833    |

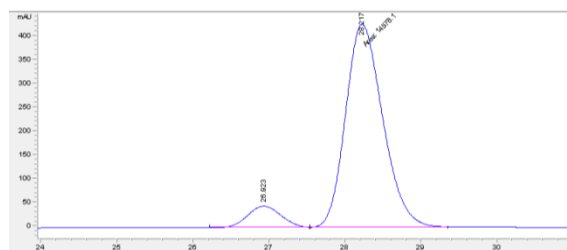

| # | Time   | Type | Area    | Height | Width  | Area%  | Symmetry |
|---|--------|------|---------|--------|--------|--------|----------|
| 1 | 26.923 | BV   | 1393.7  | 45.3   | 0.4829 | 8.727  | 0.913    |
| 2 | 28.217 | MF   | 14576.1 | 428.1  | 0.5675 | 91.273 | 0.776    |



**(S)-1-(4-Fluorobenzyl)-3-methylpiperidine, (+)-3ae**

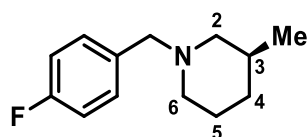

(S)-2-Methylhexane-1,5-diol<sup>6</sup> **2i** (118 mg, 1.0 mmol, >99:1 er), 4-fluorobenzylamine (0.17 mL, 1.5 mmol), [IrCp\*Cl<sub>2</sub>]<sub>2</sub> (8.0 mg, 1.0 mol%) and deionised water (0.5 mL) were subjected to **general procedure B** at 80 °C. Purification by column chromatography (pentane:Et<sub>2</sub>O 90:10) afforded piperidine (+)-**3ae** (150 mg, 72%, 90:10 er) as a colourless oil.

<sup>1</sup>H NMR (400 MHz, CDCl<sub>3</sub>) δ = 7.29-7.21 (2H, m, ArH), 7.01-6.96 (2H, m, ArH), 3.43 (2H, s, NCH<sub>2</sub>Ph), 2.79-2.71 (2H, m, CH<sub>2</sub>-2<sub>a</sub> and CH<sub>2</sub>-6<sub>eq</sub>), 1.84 (1H, td, *J* = 11.2, 3.3 Hz, CH<sub>2</sub>-6<sub>ax</sub>), 1.72-1.49 (5H, m, CH<sub>2</sub>-2<sub>b</sub>, CH-3, CH<sub>2</sub>-4<sub>a</sub>, CH<sub>2</sub>-5), 0.91-0.82 (1H, m, CH<sub>2</sub>-4<sub>b</sub>), 0.84 (3H, d, *J* = 6.4 Hz, CH<sub>3</sub>).

<sup>13</sup>C NMR (101 MHz, CDCl<sub>3</sub>) δ = 162.0 (d, *J* = 244.0 Hz), 134.6 (d, *J* = 3.2 Hz), 130.7 (d, *J* = 7.9 Hz), 115.0 (d, *J* = 20.8 Hz), 62.9, 62.0, 54.1, 33.2, 31.3, 25.7, 19.9.

<sup>19</sup>F NMR (376 MHz, CDCl<sub>3</sub>) δ = -116.40.

HRMS: ESI+ found [M+H]<sup>+</sup> = 208.1497, C<sub>13</sub>H<sub>19</sub>FN requires 208.1496, Δ = 0.48 ppm.

FTIR (film): ν<sub>max</sub> = 2928, 1604, 1508, 1465, 1458, 1356, 1293, 1221, 1154, 1120, 1091, 1078, 1039, 844, 822 cm<sup>-1</sup>.

[α]<sub>D</sub><sup>25</sup> = +8.7 (*c* = 1.0, CHCl<sub>3</sub>).

HPLC: Enantiomeric excess was determined by chiral HPLC analysis of the corresponding *N*-Cbz compound **S4** (synthesised using **general procedure C**, analytic sample isolated by preparative TLC. For full characterisation data for this compound, see **S4**, page S31). Chiralpak® IC column (99:1 hexane:IPA, 0.7 mL min<sup>-1</sup>, 210 nm, room temperature):

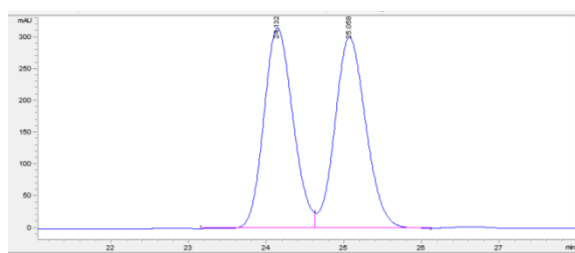

| # | Time   | Type | Area   | Height | Width  | Area%  | Symmetry |
|---|--------|------|--------|--------|--------|--------|----------|
| 1 | 24.132 | BV   | 8247.6 | 316.3  | 0.4042 | 49.766 | 0.839    |
| 2 | 25.058 | VB   | 8325.2 | 301.9  | 0.4277 | 50.234 | 0.835    |

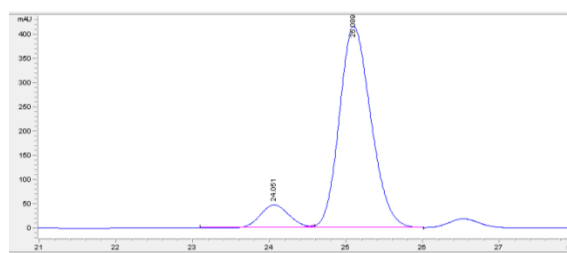

| # | Time   | Type | Area    | Height | Width  | Area%  | Symmetry |
|---|--------|------|---------|--------|--------|--------|----------|
| 1 | 24.051 | BV E | 1251.2  | 47.6   | 0.4085 | 9.524  | 0.919    |
| 2 | 25.089 | VB R | 11885.9 | 416.2  | 0.4432 | 90.476 | 1.324    |

**(S)-1-(3,5-Difluorobenzyl)-3-methylpiperidine, (+)-3af**

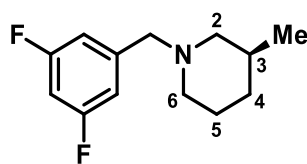

(S)-2-Methylhexane-1,5-diol<sup>6</sup> **2i** (118 mg, 1.0 mmol, >99:1 er), 3,5-difluorobenzylamine (0.18 mL, 1.5 mmol), [IrCp\*Cl<sub>2</sub>]<sub>2</sub> (8.0 mg, 1.0 mol%) and deionised water (0.5 mL) were subjected to **general procedure B** at 80 °C. Purification by column chromatography (pentane:Et<sub>2</sub>O 95:5) afforded piperidine (+)-**3af** (152 mg, 67%, 93:7 er) as a colourless oil.

<sup>1</sup>H NMR (400 MHz, CDCl<sub>3</sub>) δ = 6.90-6.84 (2H, m, ArH), 6.66 (1H, tt, *J* = 9.0, 2.4 Hz, ArH), 3.42 (2H, s, NCH<sub>2</sub>Ph), 2.77-2.69 (2H, m, CH<sub>2</sub>-2<sub>a</sub> and CH<sub>2</sub>-6<sub>eq</sub>), 1.89 (1H, td, *J* = 11.1, 3.4 Hz, CH<sub>2</sub>-6<sub>ax</sub>), 1.72-1.52 (5H, m, CH<sub>2</sub>-2<sub>b</sub>, CH-3, CH<sub>2</sub>-4<sub>a</sub>, CH<sub>2</sub>-5), 0.92-0.82 (1H, m, CH<sub>2</sub>-4<sub>b</sub>), 0.85 (3H, d, *J* = 6.2 Hz, CH<sub>3</sub>).

<sup>13</sup>C NMR (101 MHz, CDCl<sub>3</sub>) δ = 162.1 (dd, *J* = 247.8, 12.7 Hz), 142.7 (t, *J* = 8.7 Hz), 110.5-110.3 (m), 101.2 (t, *J* = 25.6 Hz), 61.8 (t, *J* = 1.9 Hz), 61.1, 53.2, 32.0, 30.3, 24.7, 18.8.

<sup>19</sup>F NMR (376 MHz, CDCl<sub>3</sub>) δ = -110.9.

HRMS: ESI+ found [M+H]<sup>+</sup> = 226.1403, C<sub>13</sub>H<sub>18</sub>F<sub>2</sub>N requires 226.1402, Δ = 0.61 ppm.

FTIR (film): ν<sub>max</sub> = 2930, 1626, 1597, 1458, 1438, 1346, 1317, 1115, 976, 965, 846 cm<sup>-1</sup>.

[α]<sub>D</sub><sup>25</sup> = +11.5 (*c* = 1.0, CHCl<sub>3</sub>).

HPLC: Enantiomeric excess was determined by chiral HPLC analysis of the corresponding *N*-Cbz compound **S4** (synthesised using **general procedure C**, analytic sample isolated by preparative TLC. For full characterisation data for this compound, see **S4**, page S31). Chiralpak® IC column (99:1 hexane:IPA, 0.7 mL min<sup>-1</sup>, 210 nm, room temperature):

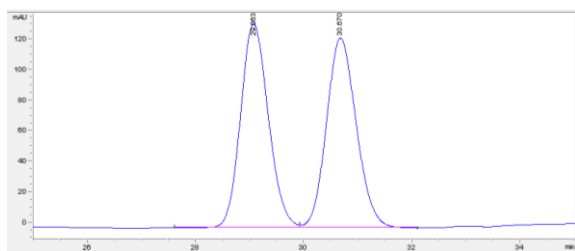

| # | Time   | Type | Area   | Height | Width  | Area%  | Symmetry |
|---|--------|------|--------|--------|--------|--------|----------|
| 1 | 29.063 | BV   | 4781.6 | 133.6  | 0.5575 | 50.028 | 0.848    |
| 2 | 30.67  | VB   | 4776.2 | 124.1  | 0.5992 | 49.972 | 0.847    |

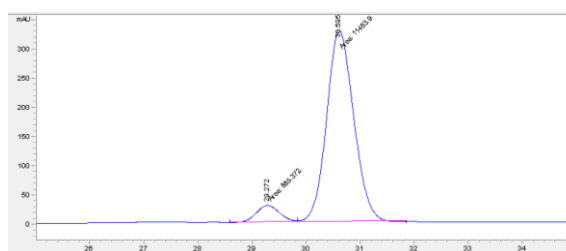

| # | Time   | Type | Area    | Height | Width  | Area%  | Symmetry |
|---|--------|------|---------|--------|--------|--------|----------|
| 1 | 29.272 | MF   | 885.4   | 28.9   | 0.5101 | 7.169  | 0        |
| 2 | 30.595 | FM   | 11463.9 | 328.9  | 0.5809 | 92.831 | 0.849    |

**(S)-3-Methyl-1-(3,4,5-trifluorobenzyl)piperidine, (+)-3ag**

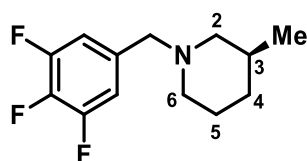

(S)-2-Methylhexane-1,5-diol<sup>6</sup> **2i** (118 mg, 1.0 mmol, >99:1 er), 3,4,5-trifluorobenzyl nitrile (0.19 mL, 1.5 mmol), [IrCp\*Cl<sub>2</sub>]<sub>2</sub> (8.0 mg, 1.0 mol%) and deionised water (0.5 mL) were subjected to **general procedure B** at 80 °C. Purification by column chromatography (pentane:Et<sub>2</sub>O 90:10) afforded piperidine (+)-**3ag** (137 mg, 56%, 90:10 er) as a colourless oil.

<sup>1</sup>H NMR (400 MHz, CDCl<sub>3</sub>) δ = 7.00-6.92 (2H, m, ArH), 3.47 (2H, s, NCH<sub>2</sub>Ph), 2.75-2.66 (2H, m, CH<sub>2</sub>-2<sub>a</sub> and CH<sub>2</sub>-6<sub>eq</sub>), 1.88 (1H, td, *J* = 11.1, 3.2 Hz, CH<sub>2</sub>-6<sub>ax</sub>), 1.73-1.49 (5H, m, CH<sub>2</sub>-2<sub>b</sub>, CH-3, CH<sub>2</sub>-4<sub>a</sub>, CH<sub>2</sub>-5), 0.92-0.83 (1H, m, CH<sub>2</sub>-4<sub>b</sub>), 0.84 (3H, d, *J* = 6.3 Hz, CH<sub>3</sub>).

<sup>13</sup>C NMR (101 MHz, CDCl<sub>3</sub>) δ = 151.2 (ddd, *J* = 249.4, 10.1, 4.0 Hz), 138.6 (dt, *J* = 249.6, 15.4 Hz), 135.9 (td, *J* = 6.8, 4.6 Hz), 112.4 (d, *J* = 20.8 Hz), 62.4, 62.0, 54.1, 33.0, 31.3, 25.6, 19.8.

<sup>19</sup>F NMR (376 MHz, CDCl<sub>3</sub>) δ = -135.3, -163.6.

HRMS: ESI+ found [M+H]<sup>+</sup> = 244.1308, C<sub>13</sub>H<sub>17</sub>F<sub>3</sub>N requires 244.1308, Δ = 0.34 ppm.

FTIR (film): ν<sub>max</sub> = 2930, 1621, 1526, 1445, 1372, 1360, 1350, 1231, 1131, 1122, 1039, 980 cm<sup>-1</sup>.

[α]<sub>D</sub><sup>25</sup> = +10.4 (*c* = 1.0, CHCl<sub>3</sub>).

HPLC: Enantiomeric excess was determined by chiral HPLC analysis of the corresponding *N*-Cbz compound **S4** (synthesised using **general procedure C**, analytic sample isolated by preparative TLC. For full characterisation data for this compound, see **S4**, page S31). Chiralpak<sup>®</sup> IC column (99:1 hexane:IPA, 0.7 mL min<sup>-1</sup>, 210 nm, room temperature):

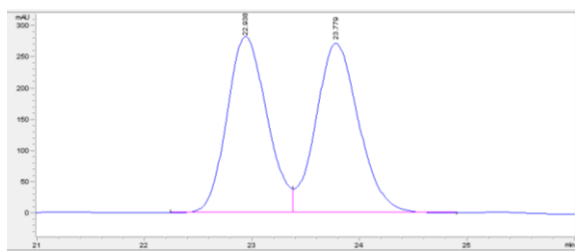

| # | Time   | Type | Area   | Height | Width  | Area%  | Symmetry |
|---|--------|------|--------|--------|--------|--------|----------|
| 1 | 22.938 | BV   | 7300.9 | 281.8  | 0.4022 | 49.195 | 0.837    |
| 2 | 23.779 | VB   | 7539.8 | 271.5  | 0.4261 | 50.805 | 0.835    |

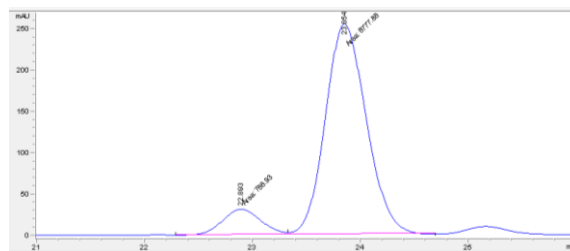

| # | Time   | Type | Area   | Height | Width  | Area%  | Symmetry |
|---|--------|------|--------|--------|--------|--------|----------|
| 1 | 22.893 | MF   | 766.9  | 30.8   | 0.4148 | 10.165 | 0.909    |
| 2 | 23.854 | FM   | 6777.9 | 255.5  | 0.4421 | 89.835 | 0.849    |

### (S)-1-(4-Methoxybenzyl)-3-methylpiperidine, (+)-3ah

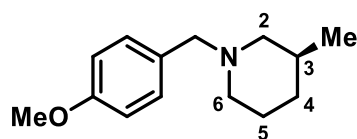

(S)-2-Methylhexane-1,5-diol<sup>6</sup> **2i** (118 mg, 1.0 mmol, >99:1 er), *p*-methoxybenzylamine (0.20 mL, 1.5 mmol), [IrCp\*Cl<sub>2</sub>]<sub>2</sub> (8.0 mg, 1.0 mol%) and deionised water (0.5 mL) were subjected to **general procedure B** at 80 °C. Purification by column chromatography (pentane:Et<sub>2</sub>O 75:25) afforded piperidine (+)-**3ah** (148 mg, 67%, 72:28 er) as a colourless oil.

<sup>1</sup>H NMR (400 MHz, CDCl<sub>3</sub>) δ = 7.24-7.20 (2H, m, ArH), 6.87-6.83 (2H, m, ArH), 3.80 (3H, s, OCH<sub>3</sub>), 3.42 (2H, s, NCH<sub>2</sub>Ph), 2.82-2.74 (2H, m, CH<sub>2</sub>-2<sub>a</sub> and CH<sub>2</sub>-6<sub>eq</sub>), 1.83 (1H, td, *J* = 11.2, 3.5 Hz, CH<sub>2</sub>-6<sub>ax</sub>), 1.72-1.49 (5H, m, CH<sub>2</sub>-2<sub>b</sub>, CH-3, CH<sub>2</sub>-4<sub>a</sub>, CH<sub>2</sub>-5), 0.89-0.80 (1H, m, CH<sub>2</sub>-4<sub>b</sub>), 0.83 (3H, d, *J* = 6.4 Hz, CH<sub>3</sub>).  
<sup>13</sup>C NMR (101 MHz, CDCl<sub>3</sub>) δ = 158.7, 130.8, 130.5, 113.6, 63.1, 62.0, 55.4, 54.0, 33.3, 31.3, 25.7, 19.9.

HRMS: ESI+ found [M+H]<sup>+</sup> = 220.1696, C<sub>14</sub>H<sub>22</sub>NO requires 220.1696, Δ = 0.12 ppm.

FTIR (film): ν<sub>max</sub> = 2927, 1613, 1511, 1464, 1300, 1243, 1179, 1121, 1038, 830, 815 cm<sup>-1</sup>.

[α]<sub>D</sub><sup>25</sup> = +5.2 (*c* = 1.0, CHCl<sub>3</sub>).

HPLC: Enantiomeric excess was determined by chiral HPLC analysis of the corresponding *N*-Cbz compound **S4** (synthesised using **general procedure C**, analytic sample isolated by preparative TLC. For full characterisation data for this compound, see **S4**, page S31). Chiralpak® IC column (99:1 hexane:IPA, 0.7 mL min<sup>-1</sup>, 210 nm, room temperature):

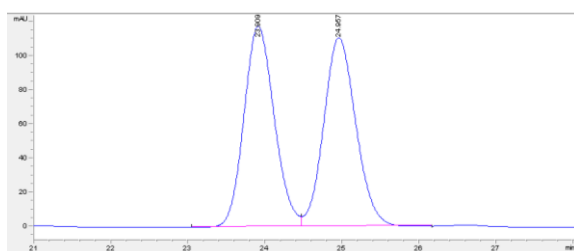

| # | Time   | Type | Area   | Height | Width  | Area%  | Symmetry |
|---|--------|------|--------|--------|--------|--------|----------|
| 1 | 23.909 | BV   | 3232.9 | 118    | 0.4238 | 50.056 | 0.858    |
| 2 | 24.957 | VB   | 3225.7 | 110.9  | 0.4492 | 49.944 | 0.856    |

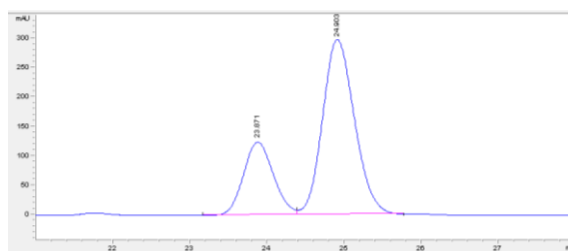

| # | Time   | Type | Area   | Height | Width  | Area%  | Symmetry |
|---|--------|------|--------|--------|--------|--------|----------|
| 1 | 23.871 | BV   | 3369.6 | 124.6  | 0.4216 | 28.138 | 0.87     |
| 2 | 24.903 | VB   | 8605.5 | 298.8  | 0.446  | 71.862 | 0.824    |

### (S)-1-(Benzo[d][1,3]dioxol-5-ylmethyl)-3-methylpiperidine, (+)-3ai

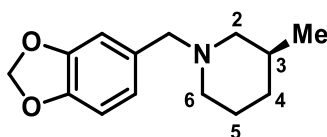

(S)-2-Methylhexane-1,5-diol<sup>6</sup> **2i** (118 mg, 1.0 mmol, >99:1 er), piperonylamine (0.19 mL, 1.5 mmol), [IrCp\*Cl<sub>2</sub>]<sub>2</sub> (8.0 mg, 1.0 mol%) and deionised water (0.5 mL) were subjected to **general procedure B**

at 80 °C. Purification by column chromatography (pentane:Et<sub>2</sub>O 50:50) afforded piperidine (+)-**3ai** (68 mg, 29%, 64:36 er) as a colourless oil.

<sup>1</sup>H NMR (400 MHz, CDCl<sub>3</sub>) δ = 6.85 (1H, t, *J* = 1.0 Hz, ArH), 6.74-6.72 (2H, m, ArH), 5.93 (2H, s, OCH<sub>2</sub>O), 3.38 (2H, s, NCH<sub>2</sub>Ph), 2.81-2.73 (2H, m, CH<sub>2</sub>-2<sub>a</sub> and CH<sub>2</sub>-6<sub>eq</sub>), 1.83 (1H, td, *J* = 11.2, 3.4 Hz, CH<sub>2</sub>-6<sub>ax</sub>), 1.72-1.49 (5H, m, CH<sub>2</sub>-2<sub>b</sub>, CH-3, CH<sub>2</sub>-4<sub>a</sub>, CH<sub>2</sub>-5), 0.89-0.83 (1H, m, CH<sub>2</sub>-4<sub>b</sub>), 0.83 (3H, d, *J* = 6.4 Hz, CH<sub>3</sub>).

<sup>13</sup>C NMR (101 MHz, CDCl<sub>3</sub>) δ = 147.6, 146.5, 132.8, 122.3, 109.7, 107.9, 100.9, 63.5, 62.0, 54.0, 33.2, 31.3, 25.7, 19.9.

HRMS: ESI+ found [M+H]<sup>+</sup> = 234.1488, C<sub>14</sub>H<sub>20</sub>NO<sub>2</sub> requires 234.1489, Δ = -0.03 ppm.

FTIR (film): ν<sub>max</sub> = 2927, 2762, 1502, 1488, 1440, 1369, 1339, 1240, 1181, 1159, 1112, 1039, 932 cm<sup>-1</sup>.  
[α]<sub>D</sub><sup>25</sup> = +3.9 (*c* = 1.0, CHCl<sub>3</sub>).

HPLC: Enantiomeric excess was determined by chiral HPLC analysis of the corresponding *N*-Cbz compound **S4** (synthesised using **general procedure C**, analytic sample isolated by preparative TLC. For full characterisation data for this compound, see **S4**, page S31). Chiralpak® IC column (99:1 hexane:IPA, 0.7 mL min<sup>-1</sup>, 210 nm, room temperature):

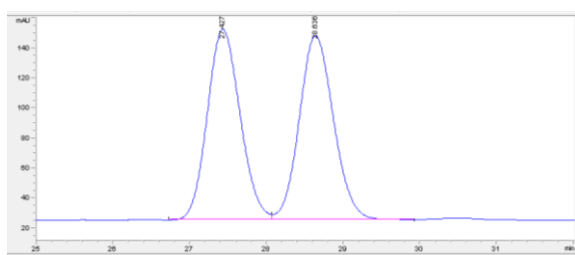

| # | Time   | Type | Area   | Height | Width  | Area%  | Symmetry |
|---|--------|------|--------|--------|--------|--------|----------|
| 1 | 27.427 | BV   | 3793.2 | 127.4  | 0.4632 | 49.854 | 0.862    |
| 2 | 28.636 | VB   | 3815.5 | 123    | 0.4818 | 50.146 | 0.863    |

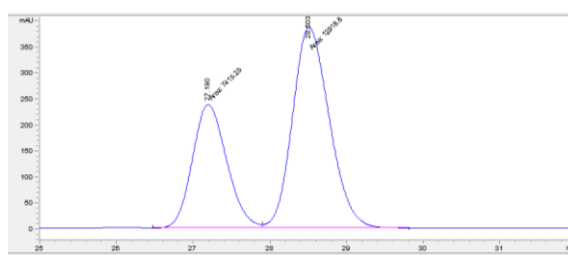

| # | Time   | Type | Area    | Height | Width  | Area%  | Symmetry |
|---|--------|------|---------|--------|--------|--------|----------|
| 1 | 27.19  | MF   | 7415.2  | 237.7  | 0.52   | 36.467 | 0        |
| 2 | 28.503 | FM   | 12918.8 | 386.4  | 0.5572 | 63.533 | 0.796    |

### (S)-3-Methyl-1-(naphthalen-1-ylmethyl)piperidine, (+)-**3aj**

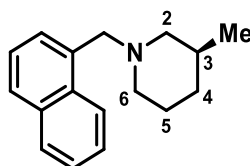

(S)-2-Methylhexane-1,5-diol<sup>6</sup> **2i** (118 mg, 1.0 mmol, >99:1 er), naphthalene-1-ylmethanamine (0.22 mL, 1.5 mmol), [IrCp\*Cl<sub>2</sub>]<sub>2</sub> (8.0 mg, 1.0 mol%) and deionised water (0.5 mL) were subjected to **general procedure B** at 80 °C. Purification by column chromatography (pentane:Et<sub>2</sub>O 90:10) afforded piperidine (+)-**3aj** (82 mg, 34%, 73:27 er) as a colourless oil.

<sup>1</sup>H NMR (400 MHz, CDCl<sub>3</sub>) δ = 8.35-8.32 (1H, m, ArH), 7.86-7.84 (1H, m, ArH), 7.77 (1H, dt, *J* = 7.9, 1.1 Hz, ArH), 7.54-7.39 (4H, m, ArH), 3.92-3.80 (2H, m, NCH<sub>2</sub>Ph), 2.89-2.83 (2H, m, CH<sub>2</sub>-2<sub>a</sub> and CH<sub>2</sub>-6<sub>eq</sub>),

1.97 (1H, td,  $J = 11.1, 3.4$  Hz,  $\text{CH}_2\text{-6}_{\text{ax}}$ ), 1.73-1.49 (5H, m,  $\text{CH}_2\text{-2}_{\text{b}}$ ,  $\text{CH-3}$ ,  $\text{CH}_2\text{-4}_{\text{a}}$ ,  $\text{CH}_2\text{-5}$ ), 0.96-0.82 (1H, m,  $\text{CH}_2\text{-4}_{\text{b}}$ ), 0.85 (3H, d,  $J = 6.1$  Hz,  $\text{CH}_3$ ).

$^{13}\text{C}$  NMR (101 MHz,  $\text{CDCl}_3$ )  $\delta = 135.0, 134.0, 132.8, 128.5, 127.7, 127.2, 125.7, 125.6, 125.3, 125.0, 62.5, 61.8, 54.5, 33.3, 31.3, 25.8, 19.9$ .

HRMS: ESI+ found  $[\text{M}+\text{H}]^+ = 240.1746$ ,  $\text{C}_{17}\text{H}_{22}\text{N}$  requires 240.1747,  $\Delta = 0.48$  ppm.

FTIR (film):  $\nu_{\text{max}} = 2926, 2801, 2756, 1509, 1465, 1457, 1370, 1341, 1168, 1126, 1117, 975, 791, 783, 772$   $\text{cm}^{-1}$ .

$[\alpha]_{\text{D}}^{25} = +10.1$  ( $c = 1.0$ ,  $\text{CHCl}_3$ ).

HPLC: Enantiomeric excess was determined by chiral HPLC analysis of the corresponding *N*-Cbz compound **S4** (synthesised using **general procedure C**, analytic sample isolated by preparative TLC. For full characterisation data for this compound, see **S4**, page S31). Chiralpak® IC column (99:1 hexane:IPA,  $0.7$   $\text{mL min}^{-1}$ ,  $210$  nm, room temperature):

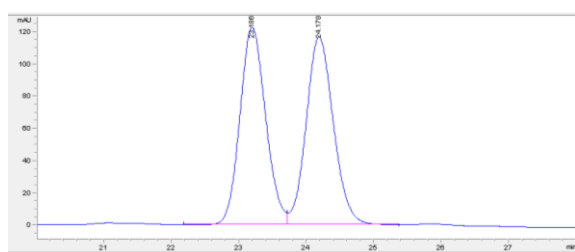

| # | Time   | Type | Area   | Height | Width  | Area%  | Symmetry |
|---|--------|------|--------|--------|--------|--------|----------|
| 1 | 23.186 | BV   | 3262.2 | 122.7  | 0.4101 | 49.837 | 0.862    |
| 2 | 24.178 | VB   | 3283.5 | 116.8  | 0.434  | 50.163 | 0.851    |

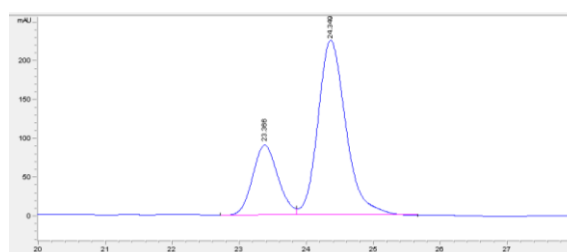

| # | Time   | Type | Area   | Height | Width  | Area%  | Symmetry |
|---|--------|------|--------|--------|--------|--------|----------|
| 1 | 23.366 | BV   | 2387.1 | 90.4   | 0.4082 | 26.761 | 0.868    |
| 2 | 24.349 | VB   | 6533   | 225.2  | 0.4445 | 73.239 | 0.784    |

### (*S*)-3-Methyl-1-((*R*)-1-phenylethyl)piperidine, (+)-**3ak**

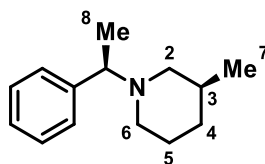

(*S*)-2-Methylhexane-1,5-diol<sup>6</sup> **2i** (118 mg, 1.0 mmol, >99:1 er), (*R*)- $\alpha$ -methylbenzylamine (0.19 mL, 1.5 mmol),  $[\text{IrCp}^*\text{Cl}_2]_2$  (8.0 mg, 1.0 mol%) and deionised water (0.5 mL) were subjected to **general procedure B** at  $80$  °C. Analysis of the crude reaction mixture by  $^1\text{H}$  NMR indicated a dr of 83:17. Purification by column chromatography (pentane:Et<sub>2</sub>O 80:20) afforded piperidine (+)-**3ak** (161 mg, 79%, 76:24 er, 85:15 dr) as a colourless oil.

$^1\text{H}$  NMR (400 MHz,  $\text{CDCl}_3$ )  $\delta = 7.35\text{-}7.21$  (5H, m, ArH), 3.41 (1H, q,  $J = 6.8$  Hz,  $\text{NCH}(\text{CH}_3)\text{Ph}$ ), 2.98-2.88 (1H, m,  $\text{CH}_2\text{-6}_{\text{eq}}$ ), 2.76-2.70 (1H, m,  $\text{CH}_2\text{-2}_{\text{eq}}$ ), 1.85 (1H, td,  $J = 11.1, 3.3$  Hz,  $\text{CH}_2\text{-6}_{\text{ax}}$ ), 1.70-1.51 (4H, m,  $\text{CH-3}$ ,  $\text{CH}_2\text{-4}_{\text{a}}$ ,  $\text{CH}_2\text{-5}$ ), 1.45 (1H, t,  $J = 10.6$  Hz,  $\text{CH}_2\text{-2}_{\text{ax}}$ ), 1.37 (3H, d,  $J = 7.0$  Hz,  $\text{CH}_3\text{-8}$ ), 0.87-0.74 (1H, m,  $\text{CH}_2\text{-4}_{\text{b}}$ ), 0.78 (3H, d,  $J = 6.4$  Hz,  $\text{CH}_3\text{-7}$ ). The minor diastereomer displays diagnostic signals at  $\delta = 3.50$

(1H, q,  $J = 6.8$  Hz, NCH(CH<sub>3</sub>)Ph), 1.76 (1H, td,  $J = 11.3, 3.0$  Hz, CH<sub>2</sub>-6<sub>ax</sub>), 1.27 (3H, d,  $J = 6.7$  Hz, CH<sub>3</sub>-8), 0.68 (3H, d,  $J = 6.3$  Hz, CH<sub>3</sub>-7).

<sup>13</sup>C NMR (101 MHz, CDCl<sub>3</sub>)  $\delta = 144.1, 128.1, 127.9, 126.8, 65.0, 59.0, 51.1, 33.4, 31.5, 26.0, 20.0, 19.5$ . Not all of the signals for the minor diastereoisomer could be distinguished, but peaks were observed at  $\delta = 65.1, 59.2, 51.1, 33.4, 25.6, 19.5, 20.0$ .

HRMS: ESI+ found  $[M+H]^+ = 204.1748$ , C<sub>14</sub>H<sub>22</sub>N requires 204.1747,  $\Delta = 0.78$  ppm.

FTIR (film):  $\nu_{\max} = 2927, 1492, 1453, 1373, 1125, 1081, 760, 700$  cm<sup>-1</sup>.

$[\alpha]_D^{25} = +38.9$  ( $c = 1.0$ , CHCl<sub>3</sub>).

HPLC: Enantiomeric excess was determined by chiral HPLC analysis of the corresponding *N*-Cbz compound **S4** (synthesised using **general procedure C**, analytic sample isolated by preparative TLC. For full characterisation data for this compound, see **S4**, page S31). Chiralpak® IC column (99:1 hexane:IPA, 0.7 mL min<sup>-1</sup>, 210 nm, room temperature):

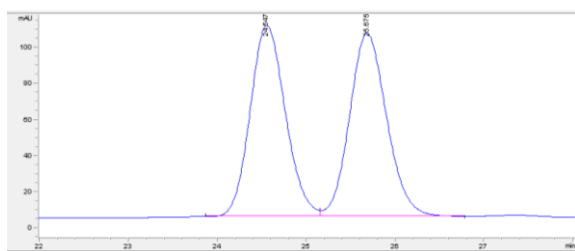

| # | Time   | Type | Area   | Height | Width  | Area%  | Symmetry |
|---|--------|------|--------|--------|--------|--------|----------|
| 1 | 24.547 | BV   | 2925.2 | 106.1  | 0.4256 | 49.756 | 0.856    |
| 2 | 25.675 | VB   | 2953.9 | 101.6  | 0.4491 | 50.244 | 0.852    |

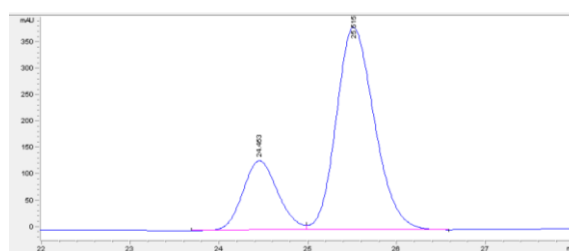

| # | Time   | Type | Area    | Height | Width  | Area%  | Symmetry |
|---|--------|------|---------|--------|--------|--------|----------|
| 1 | 24.453 | BV   | 3620.4  | 131.9  | 0.4262 | 23.901 | 0.857    |
| 2 | 25.515 | VB   | 11527.1 | 384.8  | 0.4615 | 76.099 | 0.787    |

### (*S*)-*N*-Benzyl-3-phenylpiperidine, (–)-**3j**

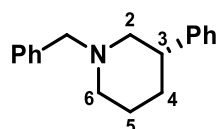

(*S*)-2-Phenylpentane-1,5-diol (+)-**2j** (144 mg, 0.8 mmol, >99:1 er), anhydrous benzylamine (0.13 mL, 1.2 mmol), [IrCp\*Cl<sub>2</sub>]<sub>2</sub> (6.3 mg, 1 mol%) and water (0.4 mL) were subjected to **general procedure B** at 80 °C. Purification by column chromatography (pentane:Et<sub>2</sub>O 90:10) afforded piperidine (–)-**3j** (107 mg, 43%, 67:33 er) as a colourless solid. The spectral data was identical to that of the corresponding racemate described above.

$[\alpha]_D^{25} = -10.6$  ( $c = 1.0$ , CHCl<sub>3</sub>).

The enantiomeric purity was determined by chiral HPLC analysis after conversion to the corresponding benzyl carbamate (see below).

### Benzyl (*S*)-3-phenylpiperidine-1-carboxylate, **S5**

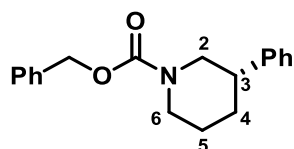

(*S*)-*N*-Benzyl-3-phenylpiperidine (–)-**3j** (30 mg, 0.12 mmol) and benzyl chloroformate (3M in toluene, 0.5 mL, 1.5 mmol) were subjected to **general procedure C**. Purification by column chromatography (pentane:Et<sub>2</sub>O 75:25) afforded piperidine **55** (36 mg, 99%, 67:33 er) as a colourless oil. The corresponding racemic piperidine *rac*-**55** was prepared by an identical procedure starting from *rac*-**3j**. *The data is consistent with the literature.*<sup>19</sup>

<sup>1</sup>H NMR (400 MHz, CDCl<sub>3</sub>) δ = 7.37-7.21 (10H, m, ArH), 5.16 (2H, s, OCH<sub>2</sub>Ph), 4.38-4.20 (2H, br. m, CH<sub>2</sub>-2<sub>a</sub> and CH<sub>2</sub>-6<sub>a</sub>), 2.89-2.66 (3H, br. m, CH<sub>2</sub>-2<sub>b</sub>, CH-3 and CH<sub>2</sub>-6<sub>b</sub>), 2.07-2.02 (1H, m, CH<sub>2</sub>-4<sub>a</sub>), 1.84-1.55 (3H, m, CH<sub>2</sub>-4<sub>b</sub> and CH<sub>2</sub>-5). *Some of the signals appear broad due to the rotameric nature of the carbamate.*

<sup>13</sup>C NMR (101 MHz, CDCl<sub>3</sub>) δ = 155.4, 143.4, 137.1, 128.7, 128.6, 128.1, 128.0, 127.2, 126.8, 67.2, 50.8, 44.5, 42.8, 31.9, 25.6. *Some of the signals appear broad due to the rotameric nature of the carbamate.*

[α]<sub>D</sub><sup>25</sup> = –18.8 (c = 1.0, CHCl<sub>3</sub>).

HPLC: Enantiomeric excess was determined by HPLC with a Chiralpak® IB-N column (99:1 hexane:IPA, 1.0 mL min<sup>-1</sup>, 210 nm, room temperature):

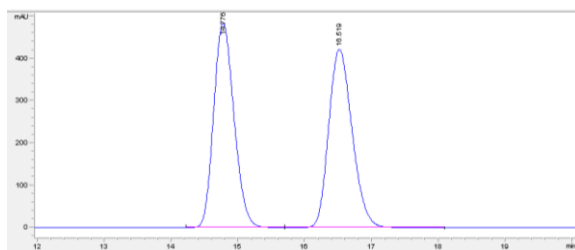

| # | Time   | Type | Area    | Height | Width  | Area%  | Symmetry |
|---|--------|------|---------|--------|--------|--------|----------|
| 1 | 14.776 | BB   | 10215.3 | 482.9  | 0.3328 | 49.899 | 0.823    |
| 2 | 16.519 | BB   | 10256.5 | 420.6  | 0.3825 | 50.101 | 0.794    |

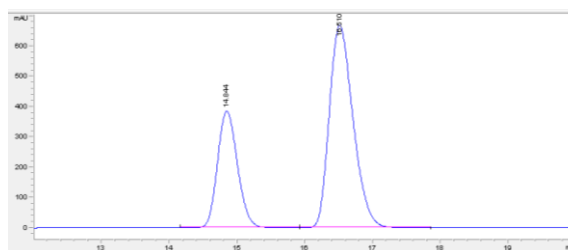

| # | Time   | Type | Area    | Height | Width  | Area%  | Symmetry |
|---|--------|------|---------|--------|--------|--------|----------|
| 1 | 14.844 | BB   | 7853.8  | 384.5  | 0.3203 | 32.585 | 0.842    |
| 2 | 16.51  | BB   | 16249.1 | 667.1  | 0.3802 | 67.415 | 0.737    |

### (*R*)-*N*-Benzyl-3-methylpyrrolidine, (–)-**3l**

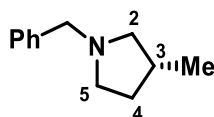

To a 2-5 mL Biotage® microwave vial equipped with a stirrer bar was added (*R*)-2-methylpentane-1,4-diol<sup>20</sup> (*R*)-**2l** (104 mg, 1.0 mmol, >99:1 er), [IrCp\*Cl<sub>2</sub>]<sub>2</sub> (8.0 mg, 1.0 mol%) and CsHCO<sub>3</sub> (3.9 mg, 2.0 mol%). The vial was sealed with a microwave vial crimp cap (containing a Reseal® septum), evacuated under vacuum and refilled with argon three times. Cyclopentyl methyl ether (0.5 mL) was



added *via* syringe, followed by anhydrous benzylamine (0.16 mL, 1.5 mmol). The vial was sealed with Parafilm<sup>®</sup>, placed in a preheated oil bath and stirred at 110 °C for 24 hours. The reaction mixture was cooled to room temperature and concentrated under a flow of nitrogen. Purification by column chromatography (pentane:Et<sub>2</sub>O 80:20, SiO<sub>2</sub> was basified with Et<sub>3</sub>N prior to use, see General Information for details) afforded pyrrolidine (–)-**3I** (126 mg, 72%, 94:6 er) as a colourless oil. The spectral data was identical to that of the corresponding racemate described above.

$[\alpha]_{\text{D}}^{25} = -5.2$  ( $c = 1.0$ , CHCl<sub>3</sub>).

The enantiomeric purity was determined by chiral HPLC analysis after conversion to the corresponding benzyl carbamate (see below).

### Benzyl (*R*)-3-methylpyrrolidine-1-carboxylate, **S6**

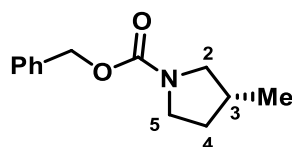

(*R*)-*N*-benzyl-3-methylpyrrolidine (–)-**3I** (19 mg, 0.08 mmol) and benzyl chloroformate (3 M in toluene, 0.5 mL, 1.5 mmol) were subjected to **general procedure C**. Purification by column chromatography (pentane:Et<sub>2</sub>O 80:20) afforded pyrrolidine **S6** (28 mg, 38%, 94:6 er) as a colourless oil. The corresponding racemic Cbz-pyrrolidine *rac*-**S6** was prepared by an identical procedure starting from *rac*-**3I**. *The data are consistent with the literature.*<sup>21</sup>

<sup>1</sup>H NMR (400 MHz, CDCl<sub>3</sub>)  $\delta$  = 7.39-7.26 (5H, m, ArH), 5.13 (2H, s, OCH<sub>2</sub>Ph), 3.63-3.50 (2H, m, CH<sub>2</sub>-2<sub>a</sub> and CH<sub>2</sub>-5<sub>a</sub>), 3.40-3.30 (1H, m, CH<sub>2</sub>-5<sub>b</sub>), 2.98-2.85 (1H, m, CH<sub>2</sub>-2<sub>b</sub>), 2.31-2.17 (1H, m, CH-3), 2.02-1.94 (1H, m, CH<sub>2</sub>-4<sub>a</sub>), 1.55-1.45 (1H, m, CH<sub>2</sub>-4<sub>b</sub>), 1.05 (3H, m, CH<sub>3</sub>).

<sup>13</sup>C NMR (101 MHz, CDCl<sub>3</sub>)  $\delta$  = 155.0, 137.3, 128.6, 128.0, 127.9, 66.72, 66.69, 53.4, 53.0, 46.2, 45.8, 33.8, 33.7, 33.0, 32.9, 17.8. *N.B. The majority of the signals are doubled due to the rotameric nature of the carbamate.*

HRMS: ESI+ found  $[M+Na]^+ = 242.1153$ , C<sub>13</sub>H<sub>17</sub>NO<sub>2</sub>Na requires 242.1152,  $\Delta = 0.54$  ppm.

FTIR (film):  $\nu_{\text{max}} = 2959, 2874, 1702, 1419, 1358, 1216, 1177, 1149, 1133, 1103, 1074$  cm<sup>-1</sup>.

$[\alpha]_{\text{D}}^{25} = +18.5$  ( $c = 1.0$ , CHCl<sub>3</sub>).

HPLC: Enantiomeric excess was determined by HPLC with a Chiralpak® IB-N column (99:1 hexane:IPA, 1.0 mL min<sup>-1</sup>, 210 nm, room temperature):

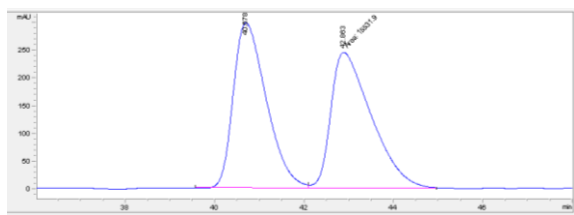

| # | Time   | Type | Area    | Height | Width  | Area%  | Symmetry |
|---|--------|------|---------|--------|--------|--------|----------|
| 1 | 40.678 | BV   | 15420.7 | 299.4  | 0.7928 | 49.820 | 0.589    |
| 2 | 42.863 | MF   | 15531.9 | 246.4  | 1.0507 | 50.180 | 0.458    |

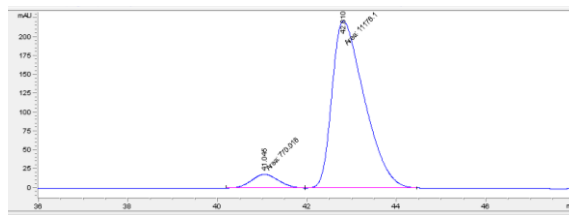

| # | Time   | Type | Area    | Height | Width  | Area%  | Symmetry |
|---|--------|------|---------|--------|--------|--------|----------|
| 1 | 41.045 | MF   | 770     | 18.2   | 0.7043 | 6.446  | 0.914    |
| 2 | 42.81  | FM   | 11176.1 | 221.9  | 0.8395 | 93.554 | 0.528    |

### (S)-1-Benzyl-3-isobutylpyrrolidine, (+)-**3al**

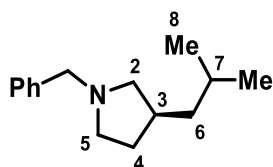

To a 2-5 mL Biotage® microwave vial equipped with a stirrer bar was added (S)-2-isobutylbutane-1,4-diol (–)-**2al** (146 mg, 1.0 mmol), [IrCp\*Cl<sub>2</sub>]<sub>2</sub> (8.0 mg, 1.0 mol%) and CsHCO<sub>3</sub> (3.9 mg, 2.0 mol%). The vial was sealed with a microwave vial crimp cap (containing a Reseal® septum), evacuated under vacuum and refilled with argon three times. Cyclopentyl methyl ether (0.5 mL) was added *via* syringe, followed by anhydrous benzylamine (0.16 mL, 1.5 mmol). The vial was sealed with Parafilm®, placed in a preheated oil bath and stirred at 110 °C for 24 hours. The reaction mixture was cooled to room temperature and concentrated under a flow of nitrogen. Purification by column chromatography (pentane:Et<sub>2</sub>O 75:25, SiO<sub>2</sub> was basified with Et<sub>3</sub>N prior to use, see General Information for details) afforded pyrrolidine (+)-**3al** (169 mg, 78%, 89:11 er) as a colourless oil. The corresponding racemic pyrrolidine *rac*-**3al** was prepared by an identical procedure starting from *rac*-**2al**.

<sup>1</sup>H NMR (400 MHz, CDCl<sub>3</sub>) δ = 7.35 – 7.21 (5H, m, ArH), 3.61 (1H, d, *J* = 12.8 Hz, NCH<sub>2a</sub>Ph), 3.57 (1H, d, *J* = 12.8 Hz, NCH<sub>2b</sub>Ph), 2.84 (1H, dd, *J* = 9.0, 7.4 Hz, CH<sub>2-2a</sub>), 2.72 (1H, ddd, *J* = 9.2, 8.0, 5.2 Hz, CH<sub>2-5a</sub>), 2.39 (1H, td, *J* = 8.9, 6.5 Hz, CH<sub>2-5b</sub>), 2.31 – 2.18 (1H, m, CH-3), 2.04 – 1.94 (2H, m, CH<sub>2-2b</sub> and CH<sub>2-4a</sub>), 1.60 – 1.45 (1H, nonet, *J* = 6.7 Hz, CH-7), 1.36 (1H, dddd, *J* = 12.2, 8.6, 6.7, 5.3 Hz, CH<sub>2-4b</sub>), 1.24 (2H, t, *J* = 7.2 Hz, CH<sub>2-6</sub>), 0.87 (3H, d, *J* = 6.6 Hz, CH<sub>3-8a</sub>), 0.85 (3H, d, *J* = 6.6 Hz, CH<sub>3-8b</sub>).

<sup>13</sup>C NMR (101 MHz, CDCl<sub>3</sub>) δ = 139.6, 129.0, 128.3, 126.9, 61.1, 61.0, 54.1, 45.2, 35.5, 31.1, 26.9, 22.9, 22.9.

HRMS: ESI+ found [M+H]<sup>+</sup> = 218.1904, C<sub>15</sub>H<sub>24</sub>N requires 218.1903, Δ = 0.26 ppm.

FTIR (film): ν<sub>max</sub> = 2954, 2783, 1467, 1454, 1382, 1351, 1155, 1132, 738, 698 cm<sup>-1</sup>.

$[\alpha]_D^{25} = +10.2$  ( $c = 1.0$ ,  $\text{CHCl}_3$ ).

The enantiomeric purity was determined by chiral HPLC analysis after conversion to the corresponding benzyl carbamate (see below).

### Benzyl (*S*)-3-isobutylpyrrolidine-1-carboxylate, **S7**

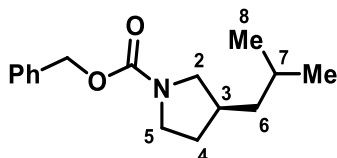

(*S*)-1-Benzyl-3-isobutylpyrrolidine (+)-**3al** (30 mg, 0.14 mmol) and benzyl chloroformate (3 M in toluene, 0.28 mL, 0.83 mmol) were subjected to **general procedure C**. Purification by column chromatography afforded piperidine **S7** (19 mg, 53%, 89:11 e.r.). The corresponding racemic Cbz-pyrrolidine *rac*-**S7** was prepared by an identical procedure starting from *rac*-**3al**.

$^1\text{H}$  NMR (400 MHz,  $\text{CDCl}_3$ )  $\delta = 7.40 - 7.27$  (5H, m, ArH), 5.13 (2H, s,  $\text{OCH}_2\text{Ph}$ ), 3.67 – 3.47 (2H, m,  $\text{CH}_2$ -**2a** and  $\text{CH}_2$ -**5a**), 3.37-3.26 (1H, m,  $\text{CH}_2$ -**5b**), 2.96 – 2.83 (1H, m,  $\text{CH}_2$ -**2b**), 2.29 – 2.12 (1H, m, CH-**3**), 2.06 – 1.93 (1H, m,  $\text{CH}_2$ -**4a**), 1.64 – 1.39 (2H, m, CH-**7** and  $\text{CH}_2$ -**4b**), 1.31 – 1.21 (2H, m,  $\text{CH}_2$ -**6**), 0.95 – 0.86 (6H, m, 2 x  $\text{CH}_3$ -**8**).

$^{13}\text{C}$  NMR (101 MHz,  $\text{CDCl}_3$ )  $\delta = 155.0, 137.3, 128.6, 128.0, 128.0, 128.0, 127.9, 66.7, 66.7, 52.1, 51.7, 46.2, 45.7, 42.6, 42.6, 37.2, 36.3, 32.3, 31.5, 26.9, 26.8, 23.0, 22.9, 22.8, 22.8$ . *N.B. The majority of the signals are doubled due to the rotameric nature of the carbamate.*

HRMS: ESI+ found  $[\text{M}+\text{Na}]^+ = 284.1621$ ,  $\text{C}_{16}\text{H}_{23}\text{O}_2\text{NNa}$  requires 284.1621,  $\Delta = -0.08$  ppm.

FTIR (film):  $\nu_{\text{max}} = 2955, 1704, 1418, 1359, 1109, 768, 697$   $\text{cm}^{-1}$ .

$[\alpha]_D^{25} = -21.4$  ( $c = 1.0$ ,  $\text{CHCl}_3$ ).

HPLC: Enantiomeric excess was determined by HPLC with a Chiralpak® IA column (99:1 hexane:IPA, 1.0 mL  $\text{min}^{-1}$ , 210 nm, room temperature):

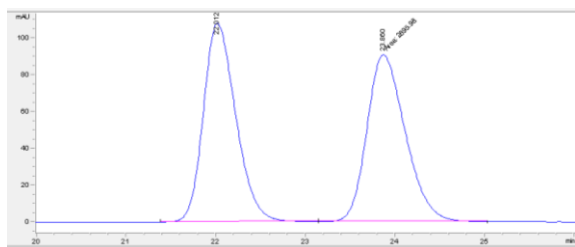

| # | Time   | Type | Area   | Height | Width  | Area%  | Symmetry |
|---|--------|------|--------|--------|--------|--------|----------|
| 1 | 22.012 | BB   | 2707.9 | 107.8  | 0.3872 | 50.111 | 0.729    |
| 2 | 23.86  | MF   | 2696   | 90.6   | 0.4961 | 49.889 | 0.728    |

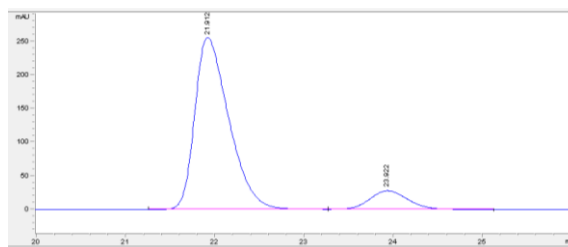

| # | Time   | Type | Area   | Height | Width  | Area%  | Symmetry |
|---|--------|------|--------|--------|--------|--------|----------|
| 1 | 21.912 | BB   | 6768.1 | 256.1  | 0.4043 | 89.309 | 0.577    |
| 2 | 23.922 | BB   | 810.2  | 27.6   | 0.4544 | 10.691 | 0.842    |

### (*R*)-1-Benzyl-3-isopropylpyrrolidine, (+)-**3am**

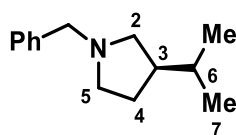

To a 2-5 mL Biotage<sup>®</sup> microwave vial equipped with a stirrer bar was added (*R*)-2-isopropylbutane-1,4-diol (–)-**2am** (132 mg, 1.0 mmol), [IrCp\*Cl<sub>2</sub>]<sub>2</sub> (8.0 mg, 1.0 mol%) and CsHCO<sub>3</sub> (3.9 mg, 2.0 mol%). The vial was sealed with a microwave vial crimp cap (containing a Reseal<sup>®</sup> septum), evacuated under vacuum and refilled with argon three times. Cyclopentyl methyl ether (0.5 mL) was added *via* syringe, followed by anhydrous benzylamine (0.16 mL, 1.5 mmol). The vial was sealed with Parafilm<sup>®</sup>, placed in a preheated oil bath and stirred at 110 °C for 24 hours. The reaction mixture was cooled to room temperature and concentrated under a flow of nitrogen. Purification by column chromatography (pentane:Et<sub>2</sub>O 75:25, SiO<sub>2</sub> was basified with Et<sub>3</sub>N prior to use, see General Information for details) afforded pyrrolidine (+)-**3am** (155 mg, 76%, 92:8 er) as a colourless oil. The corresponding racemic pyrrolidine *rac*-**3am** was prepared by an identical procedure starting from *rac*-**2am**.

<sup>1</sup>H NMR (400 MHz, CDCl<sub>3</sub>) δ = 7.29 – 7.13 (5H, m, ArH), 3.54 (1H, d, *J* = 12.8 Hz, NCH<sub>2a</sub>Ph), 3.49 (1H, d, *J* = 12.8 Hz, NCH<sub>2b</sub>Ph), 2.74 (1H, dd, *J* = 9.0, 7.4 Hz, CH<sub>2-2a</sub>), 2.71 – 2.63 (1H, m, CH<sub>2-5a</sub>), 2.28 (1H, td, *J* = 8.9, 6.2 Hz, CH<sub>2-5b</sub>), 1.98 (1H, t, *J* = 8.6 Hz, CH<sub>2-2b</sub>), 1.92 – 1.72 (2H, m, CH<sub>2-4a</sub> and CH-3), 1.45 – 1.31 (2H, m, CH<sub>2-4b</sub> and CH-6), 0.81 (3H, d, *J* = 6.6 Hz, CH<sub>3-7a</sub>), 0.77 (3H, d, *J* = 6.6 Hz, CH<sub>3-7b</sub>).

<sup>13</sup>C NMR (101 MHz, CDCl<sub>3</sub>) δ = 139.6, 129.0, 128.3, 126.9, 61.2, 59.2, 54.4, 45.6, 33.2, 29.2, 21.5, 21.3.

HRMS: ESI+ found [M+H]<sup>+</sup> = 204.1747, C<sub>14</sub>H<sub>22</sub>N requires 204.1747, Δ = 0.33 ppm.

FTIR (film): ν<sub>max</sub> = 2956, 2784, 1453, 1377, 1154, 737, 698 cm<sup>-1</sup>.

[α]<sub>D</sub><sup>25</sup> = +5.5 (*c* = 1.0, CHCl<sub>3</sub>).

The enantiomeric purity was determined by chiral HPLC analysis after conversion to the corresponding benzyl carbamate (see below).

### Benzyl (*R*)-3-isopropylpyrrolidine-1-carboxylate, **S8**

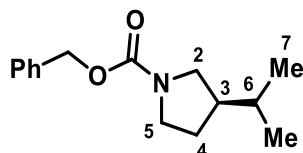

(*R*)-1-Benzyl-3-isopropylpyrrolidine (+)-**3am** (30 mg, 0.15 mmol) and benzyl chloroformate (3 M in toluene, 0.29 mL, 0.89 mmol) were subjected to **general procedure C**. Purification by column

chromatography afforded piperidine **S8** (13 mg, 36%, 92:8 e.r.). The corresponding racemic Cbz-pyrrolidine *rac*-**S8** was prepared by an identical procedure starting from *rac*-**3am**.

$^1\text{H}$  NMR (400 MHz,  $\text{CDCl}_3$ )  $\delta$  = 7.41 – 7.27 (5H, m, ArH), 5.13 (2H, s,  $\text{OCH}_2\text{Ph}$ ), 3.70 – 3.52 (2H, m,  $\text{CH}_2$ -**2a** and  $\text{CH}_2$ -**5a**), 3.34 – 3.24 (1H, m,  $\text{CH}_2$ -**5b**), 2.99 – 2.89 (1H, m,  $\text{CH}_2$ -**2b**), 2.06 – 1.95 (1H, m,  $\text{CH}_2$ -**4a**), 1.90 – 1.74 (1H, m,  $\text{CH}$ -**3**), 1.57 – 1.41 (2H, m,  $\text{CH}$ -**6** and  $\text{CH}_2$ -**4b**), 0.95 – 0.89 (6H, m, 2 x  $\text{CH}_3$ -**7**).

$^{13}\text{C}$  NMR (101 MHz,  $\text{CDCl}_3$ )  $\delta$  = 155.0, 137.3, 128.6, 128.1, 128.0, 128.0, 66.7, 66.7, 50.9, 50.4, 46.9, 46.7, 46.3, 46.1, 32.1, 30.6, 29.8, 21.6, 21.3, 21.3. *N.B.* The majority of the signals are doubled due to the rotameric nature of the carbamate.

HRMS: ESI+ found  $[\text{M}+\text{H}]^+ = 248.1646$ ,  $\text{C}_{15}\text{H}_{22}\text{O}_2\text{N}$  requires 248.1645,  $\Delta = 0.55$  ppm.

FTIR (film):  $\nu_{\text{max}} = 2959, 1703, 1418, 1359, 1106, 798, 697$   $\text{cm}^{-1}$ .

$[\alpha]_{\text{D}}^{25} = -32.4$  ( $c = 1.0$ ,  $\text{CHCl}_3$ ).

HPLC: Enantiomeric excess was determined by HPLC with a Chiralpak® IA column (99:1 hexane:IPA, 1.0 mL  $\text{min}^{-1}$ , 210 nm, room temperature):

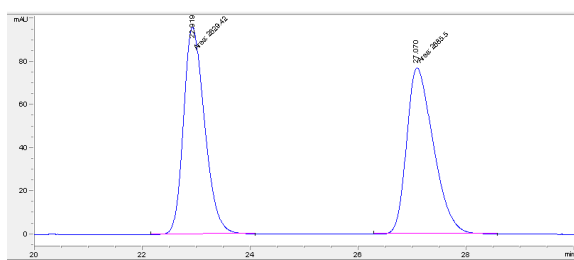

| # | Time   | Type | Area   | Height | Width  | Area%  | Symmetry |
|---|--------|------|--------|--------|--------|--------|----------|
| 1 | 22.919 | MF   | 2629.4 | 96.4   | 0.4544 | 49.473 | 0.722    |
| 2 | 27.07  | MF   | 2685.5 | 77.5   | 0.5775 | 50.527 | 0.618    |

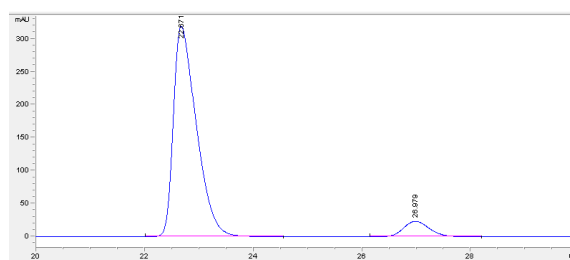

| # | Time   | Type | Area   | Height | Width  | Area%  | Symmetry |
|---|--------|------|--------|--------|--------|--------|----------|
| 1 | 22.671 | BB   | 9385.3 | 318.8  | 0.4475 | 92.375 | 0.501    |
| 2 | 26.979 | BB   | 774.7  | 23.5   | 0.5112 | 7.625  | 0.801    |

### (2*R*,5*R*)-1-Benzyl-2,5-dimethylpiperidine, **3o**

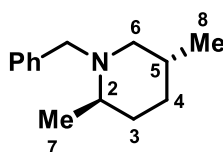

(2*R*,5*R*)-2-Methylhexane-1,5-diol (+)-**2o** (132 mg, 1.0 mmol, ~53:47 dr, 94:6 er), anhydrous benzylamine (0.16 mL, 1.5 mmol),  $[\text{IrCp}^*\text{Cl}_2]_2$  (8.0 mg, 1.0 mol%) and water (0.5 mL) were subjected to **general procedure B** at 110 °C.  $^1\text{H}$  NMR analysis of the crude reaction mixture indicated the presence of two diastereomers in 63:37 dr. Purification by column chromatography (pentane:Et<sub>2</sub>O 95:5) afforded piperidine (–)-**3o**<sub>major</sub> (105 mg, 52%, >95:5 dr, 75:25 er) as a colourless oil and piperidine (+)-**3o**<sub>minor</sub> (50 mg, 25%, >95:5 dr, 75:25 er) as a colourless oil. The spectral data for both diastereoisomers was identical to that of the corresponding racemate described above.

(–)-**3o**<sub>major</sub>:  $[\alpha]_{\text{D}}^{25} = -65.2$  ( $c = 2.1$ ,  $\text{CHCl}_3$ ).

(+)-**3o**<sub>minor</sub>:  $[\alpha]_{\text{D}}^{25} = +2.4$  ( $c = 0.7$ ,  $\text{CHCl}_3$ ).

The enantiomeric purity of each diastereoisomer was determined by chiral HPLC analysis after conversion to the corresponding benzyl carbamate (see below).

### Benzyl (2*R*,5*R*)-2,5-dimethylpiperidine-1-carboxylate, **S9**

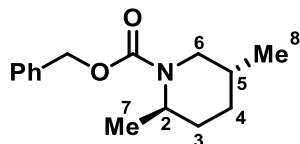

*N*-benzyl-(2*R*,5*R*)-2,5-dimethylpiperidine (–)-**30**<sub>major</sub> (26 mg, 0.13 mmol) and benzyl chloroformate (3 M in toluene, 0.5 mL, 1.5 mmol) were subjected to **general procedure C**. Purification by column chromatography afforded piperidine **S9** (31 mg, 98%, 75:25 er, >95:5 dr). The corresponding racemic piperidine *rac*-**S9** was prepared by an identical procedure starting from *rac*-**30**<sub>major</sub>.

<sup>1</sup>H NMR (400 MHz, CDCl<sub>3</sub>) δ = 7.37-7.28 (5H, m, ArH), 5.16-5.10 (2H, m, OCH<sub>2</sub>Ph), 4.46-4.39 (1H, m, CH-2), 3.73 (1H, dt, *J* = 13.6, 2.3 Hz, CH<sub>2</sub>-6<sub>a</sub>), 3.13 (1H, dd, *J* = 13.5, 3.4 Hz, CH<sub>2</sub>-6<sub>b</sub>), 1.96-1.78 (3H, m, CH<sub>2</sub>-3<sub>a</sub>, CH<sub>2</sub>-4<sub>a</sub> and CH-5), 1.32-1.25 (2H, m, CH<sub>2</sub>-3<sub>b</sub> and CH<sub>2</sub>-4<sub>b</sub>), 1.13 (3H, d, *J* = 6.9 Hz, CH<sub>3</sub>-7), 0.98 (3H, d, *J* = 6.9 Hz, CH<sub>3</sub>-8).

<sup>13</sup>C NMR (101 MHz, CDCl<sub>3</sub>) δ = 156.1, 137.3, 128.6, 127.9, 127.8, 66.9, 46.8, 44.0, 27.8, 24.9, 24.8, 16.7, 16.3.

HRMS: ESI+ found [M+H]<sup>+</sup> = 248.1646, C<sub>15</sub>H<sub>22</sub>O<sub>2</sub>N requires 248.1645, Δ = 0.24 ppm.

FTIR (film): ν<sub>max</sub> = 2936, 1693, 1423, 1355, 1336, 1308, 1260, 1244, 1159, 1076, 1029, 697 cm<sup>-1</sup>.

[α]<sub>D</sub><sup>25</sup> = –14.2 (*c* = 1.4, CHCl<sub>3</sub>).

HPLC: Enantiomeric excess was determined by HPLC with a Chiralpak® IA column (99:1 hexane:IPA, 1.0 mL min<sup>-1</sup>, 210 nm, room temperature):

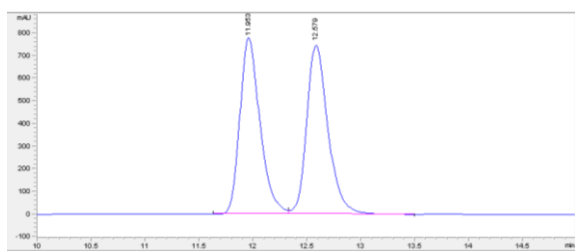

| # | Time   | Type | Area    | Height | Width  | Area%  | Symmetry |
|---|--------|------|---------|--------|--------|--------|----------|
| 1 | 11.953 | BV   | 10199.6 | 783.4  | 0.1979 | 49.627 | 0.717    |
| 2 | 12.579 | VB   | 10352.8 | 749.9  | 0.2091 | 50.373 | 0.722    |

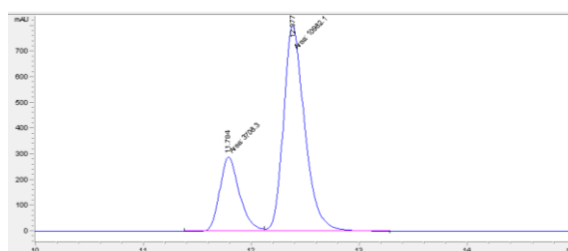

| # | Time   | Type | Area    | Height | Width  | Area%  | Symmetry |
|---|--------|------|---------|--------|--------|--------|----------|
| 1 | 11.784 | MF   | 3708.3  | 289.3  | 0.2137 | 25.243 | 0.764    |
| 2 | 12.377 | FM   | 10982.1 | 800.2  | 0.2287 | 74.757 | 0.728    |

## Benzyl (2*S*,5*R*)-2,5-dimethylpiperidine-1-carboxylate, **S10**

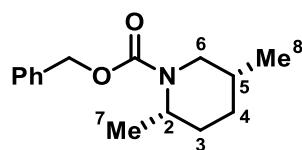

*N*-benzyl-(2*S*,5*R*)-2,5-dimethylpiperidine (+)-**3o**<sub>minor</sub> (25 mg, 0.12 mmol) and benzyl chloroformate (3M in toluene, 0.5 mL, 1.5 mmol) were subjected to **general procedure C**. Purification by column chromatography afforded piperidine **S10** (29 mg, 95%, 75:25 er, >95:5 dr). The corresponding racemic piperidine *rac*-**S10** was prepared by an identical procedure starting from *rac*-**3o**<sub>minor</sub>.

<sup>1</sup>H NMR (400 MHz, CDCl<sub>3</sub>) δ = 7.39-7.28 (5H, m, ArH), 5.13 (2H, s, OCH<sub>2</sub>Ph), 4.53-4.40 (1H, m, CH-2), 4.02-3.86 (1H, m, CH<sub>2</sub>-6<sub>a</sub>), 2.53-2.43 (1H, m, CH<sub>2</sub>-6<sub>b</sub>), 1.74-1.63 (1H, m, CH<sub>2</sub>-3<sub>a</sub>), 1.60-1.44 (3H, m, CH<sub>2</sub>-3<sub>b</sub>, CH<sub>2</sub>-4<sub>a</sub> and CH-5), 1.30-1.19 (1H, m, CH<sub>2</sub>-4<sub>b</sub>), 1.13 (3H, d, *J* = 7.0 Hz, CH<sub>3</sub>-7), 0.89 (3H, d, *J* = 6.3 Hz, CH<sub>3</sub>-8).

<sup>13</sup>C NMR (101 MHz, CDCl<sub>3</sub>) δ = 156.1, 137.3, 128.6, 128.0, 127.9, 67.0, 45.8, 31.5, 30.2, 27.6, 19.4, 16.2. N.B. the carbonyl peak was not observed presumably due to restricted N-CO bond rotation on the NMR timescale.

HRMS: ESI+ found [M+H]<sup>+</sup> = 248.1646, C<sub>15</sub>H<sub>22</sub>O<sub>2</sub>N requires 248.1645, Δ = 0.55 ppm.

FTIR (film): ν<sub>max</sub> = 2936, 1693, 1423, 1336, 1308, 1260, 1244, 1159, 1146, 1076, 1029, 697 cm<sup>-1</sup>.

[α]<sub>D</sub><sup>25</sup> = +5.0 (*c* = 1.6, CHCl<sub>3</sub>).

HPLC: Enantiomeric excess was determined by HPLC with a Chiralpak® IA column (99:1 hexane:IPA, 1.0 mL min<sup>-1</sup>, 210 nm, room temperature):

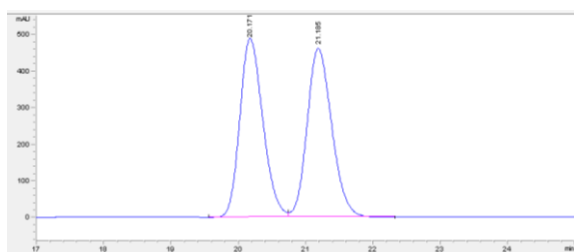

| # | Time   | Type | Area    | Height | Width  | Area%  | Symmetry |
|---|--------|------|---------|--------|--------|--------|----------|
| 1 | 20.171 | BV   | 11669.3 | 489.1  | 0.3704 | 49.751 | 0.773    |
| 2 | 21.185 | VB   | 11786.3 | 461.8  | 0.3938 | 50.249 | 0.785    |

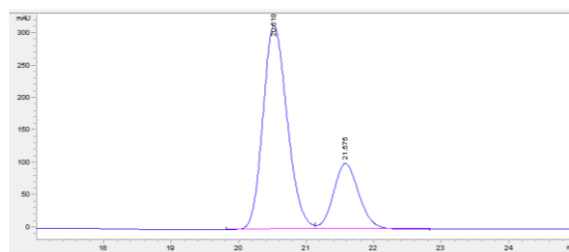

| # | Time   | Type | Area   | Height | Width  | Area%  | Symmetry |
|---|--------|------|--------|--------|--------|--------|----------|
| 1 | 20.518 | BV   | 7882.2 | 315.8  | 0.3852 | 74.707 | 0.8      |
| 2 | 21.575 | VB   | 2668.6 | 101.7  | 0.4042 | 25.293 | 0.853    |

### 4.3 Resubjection Experiment

To test whether the saturated aza-heterocycle products can undergo epimerization under the reaction conditions, isomerically pure *cis*-**3n** was resubjected to the optimized reaction conditions:

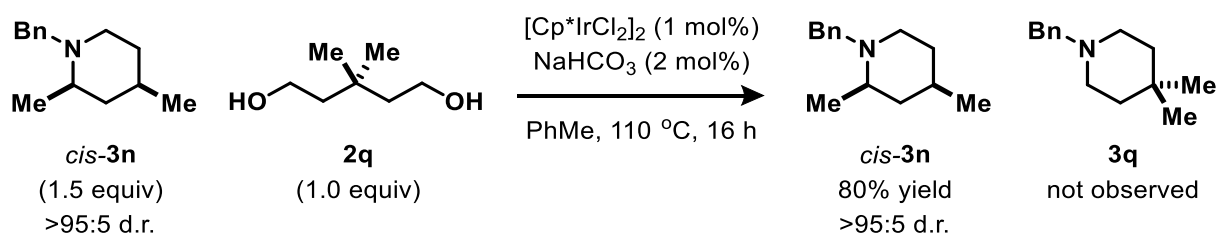

**Procedure:** 3,3-Dimethylpentane-1,5-diol<sup>6</sup> **2q** (15 mg, 0.12 mmol), *cis*-**3n** (35 mg, 0.17 mmol, >95:5 d.r.),  $[\text{IrCp}^*\text{Cl}_2]_2$  (0.9 mg, 1.0 mol%),  $\text{NaHCO}_3$  (0.2 mg, 2.0 mol%) and anhydrous toluene (0.06 mL) were subjected to **general procedure A** at  $110\text{ }^\circ\text{C}$ . Purification by column chromatography (pentane: $\text{Et}_2\text{O}$  75:25) afforded piperidine *cis*-**3n** (28 mg, 80%, >95:5 d.r.) as a colourless oil. The spectral data of *cis*-**3n** (>95:5 d.r.) was identical to that described above. No signals corresponding to the minor diastereoisomer were observed in the  $^1\text{H-NMR}$  spectra of either the purified material or the crude reaction mixture. Additionally, no formation of crossover product **3q** was observed. These results imply that epimerization of the products does not occur under the reaction conditions via reversible amine dehydrogenation.



## 5. References

- <sup>1</sup> W. C. Still, M. Kahn, A. Mitra, *J. Org. Chem.* **1978**, *43*, 2923–2925.
- <sup>2</sup> E. E. Kwan, J. R. Scheerer, D. A. Evans, *J. Org. Chem.* **2013**, *78*, 175–203.
- <sup>3</sup> T. Kano, F. Shirozu, M. Akakura, K. Maruoka, *J. Am. Chem. Soc.* **2012**, *134*, 16068–16073.
- <sup>4</sup> X. Bao, Q. Wang, J. Zhu, *Angew. Chem. Int. Ed.* **2019**, *58*, 2139–2143.
- <sup>5</sup> K. Shin, S. Joung, Y. Kim, S. Chang, *Adv. Synth. Catal.* **2017**, *359*, 3428–3436.
- <sup>6</sup> W. M. Akhtar, R. J. Armstrong, J. R. Frost, N. G. Stevenson, T. J. Donohoe, *J. Am. Chem. Soc.* **2018**, *140*, 11916–11920.
- <sup>7</sup> S. Feuillastre, B. Pelotier, O. Piva, *Eur. J. Org. Chem.* **2014**, *2014*, 1753–1759.
- <sup>8</sup> R. Cano, M. Yus, D. J. Ramón, *Tetrahedron* **2011**, *67*, 8079–8085.
- <sup>9</sup> C.-S. Chang, Y.-T. Lin, S.-R. Shih, C.-C. Lee, Y.-C. Lee, C.-L. Tai, S.-N. Tseng, J.-H. Chern, *J. Med. Chem.* **2005**, *48*, 3522–3535.
- <sup>10</sup> D. Talwar, H. Y. Li, E. Durham, J. Xiao, *Chem. Eur. J.*, **2015**, *21*, 5370–5379.
- <sup>11</sup> O. O. Kovalenko, A. Volkov, H. Adolfsson, *Org. Lett.* **2015**, *17*, 446–449.
- <sup>12</sup> Y. Pan, Z. Luo, J. Han, X. Xu, C. Chen, H. Zhao, L. Xu, Q. Fan, J. Xiao, *Adv. Synth. Catal.* **2019**, *361*, 2301–2308.
- <sup>13</sup> D. Chamorro-Arenas, U. Osorio-Nieto, L. Quintero, L. Hernández-García, F. Sartillo-Piscil, *J. Org. Chem.* **2018**, *83*, 15333–15346.
- <sup>14</sup> B. Sundararaju, M. Achard, G. V. M. Sharma, C. Bruneau, *J. Am. Chem. Soc.* **2011**, *133*, 10340–10343.
- <sup>15</sup> R. J. Armstrong, W. M. Akhtar, J. R. Frost, K. E. Christensen, N. G. Stevenson, T. J. Donohoe, *Tetrahedron* **2019**, 130680.
- <sup>16</sup> J. Wu, W. Tang, A. Pettman, J. Xiao, *Adv. Synth. Catal.* **2013**, *355*, 35–40.
- <sup>17</sup> C.-H. Tien, M. R. Adams, M. J. Ferguson, E. R. Johnson, A. W. H. Speed, *Org. Lett.* **2017**, *19*, 5565–5568.
- <sup>18</sup> S. J. Aitken, G. Grogan, C. S.-Y. Chow, N. J. Turner, S. L. Flitsch, *J. Chem. Soc., Perkin Trans. 1* **1998**, 3365–3370.
- <sup>19</sup> J. J. Verendel, T. Zhou, J.-Q. Li, A. Paptchikhine, O. Lebedev, P. G. Andersson, *J. Am. Chem. Soc.* **2010**, *132*, 8880–8881.
- <sup>20</sup> V. N. Kovalenko, O. G. Kulinkovich, *Tetrahedron: Asymm.* **2011**, *22*, 26–30.
- <sup>21</sup> W. Xue, H. Xu, Z. Liang, Q. Qian, H. Gong, *Org. Lett.* **2014**, *16*, 4984–4987.

## 6. NMR Spectra

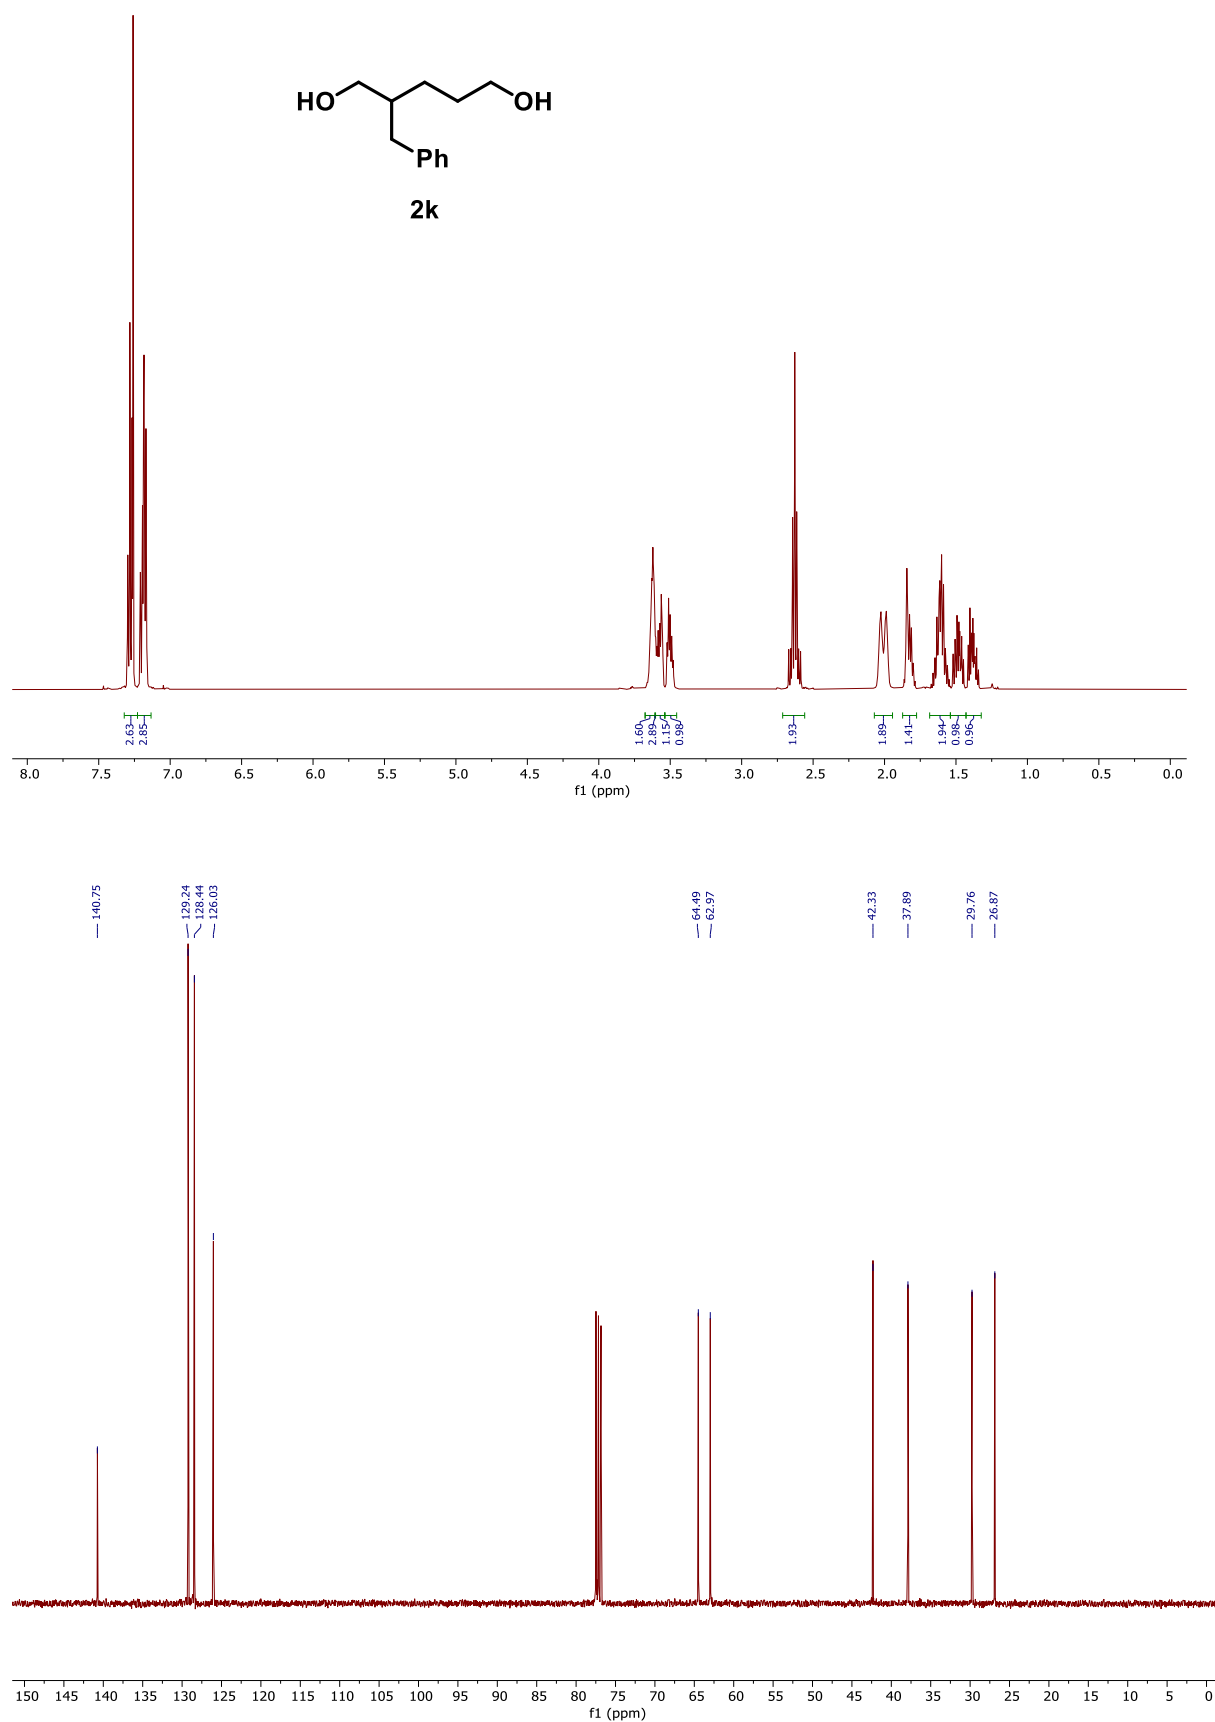

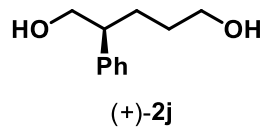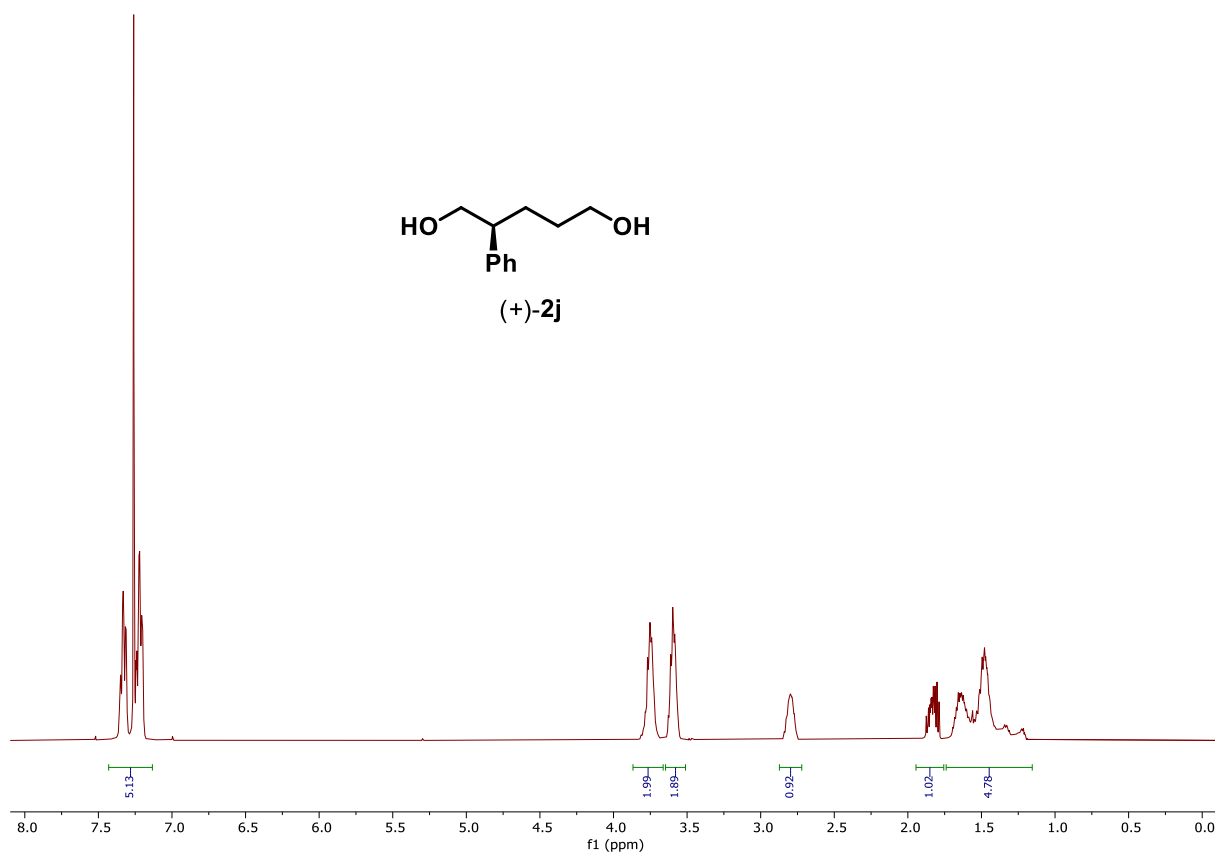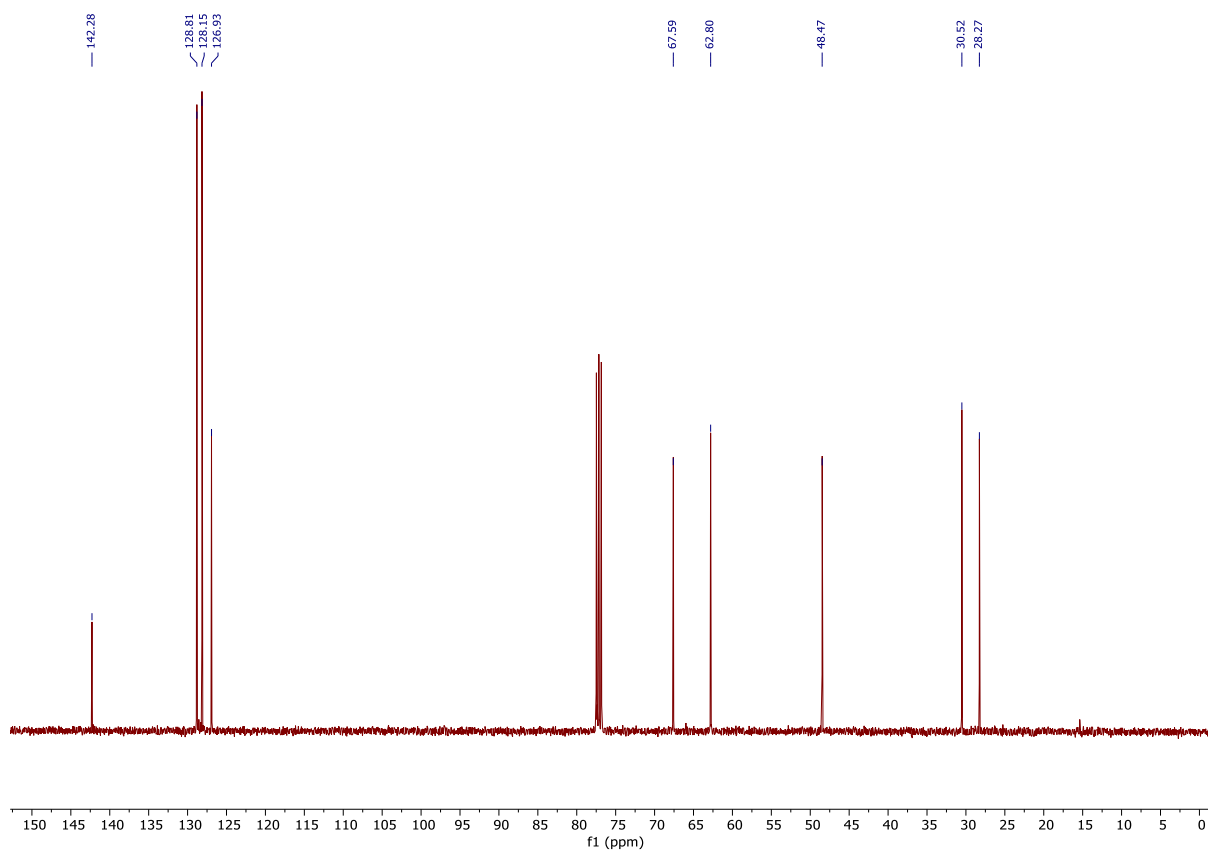

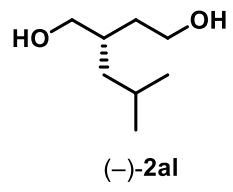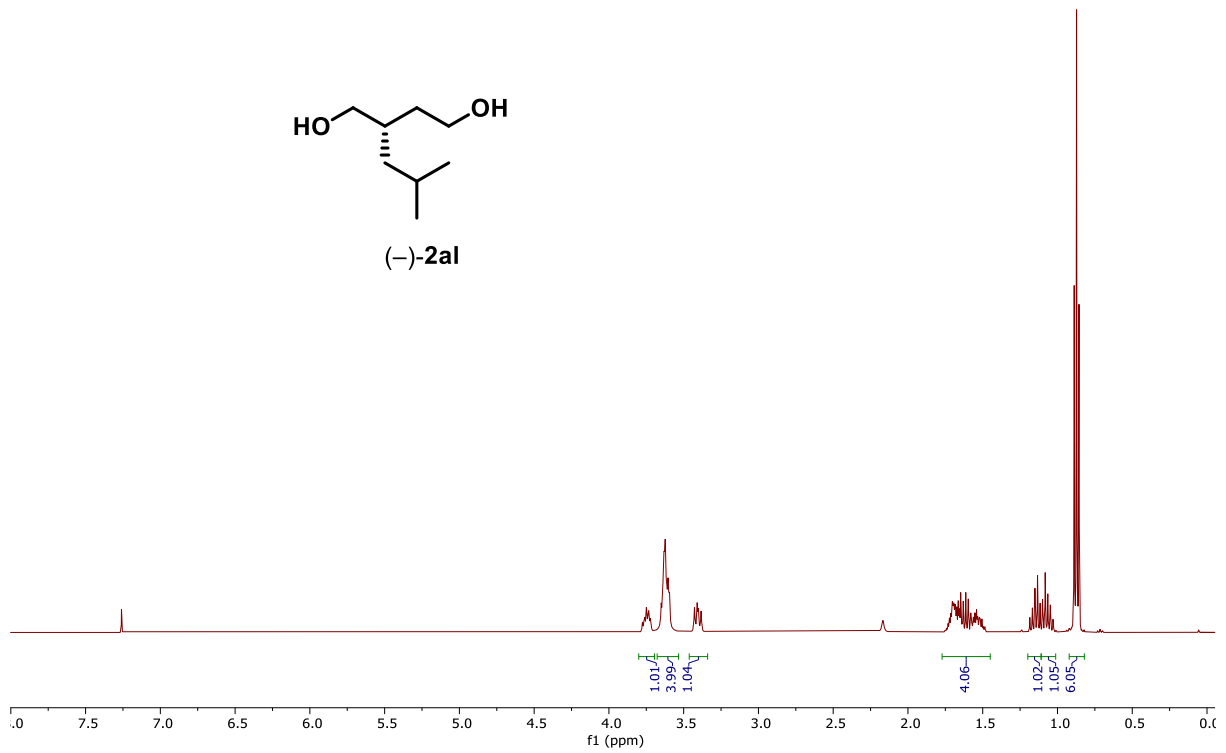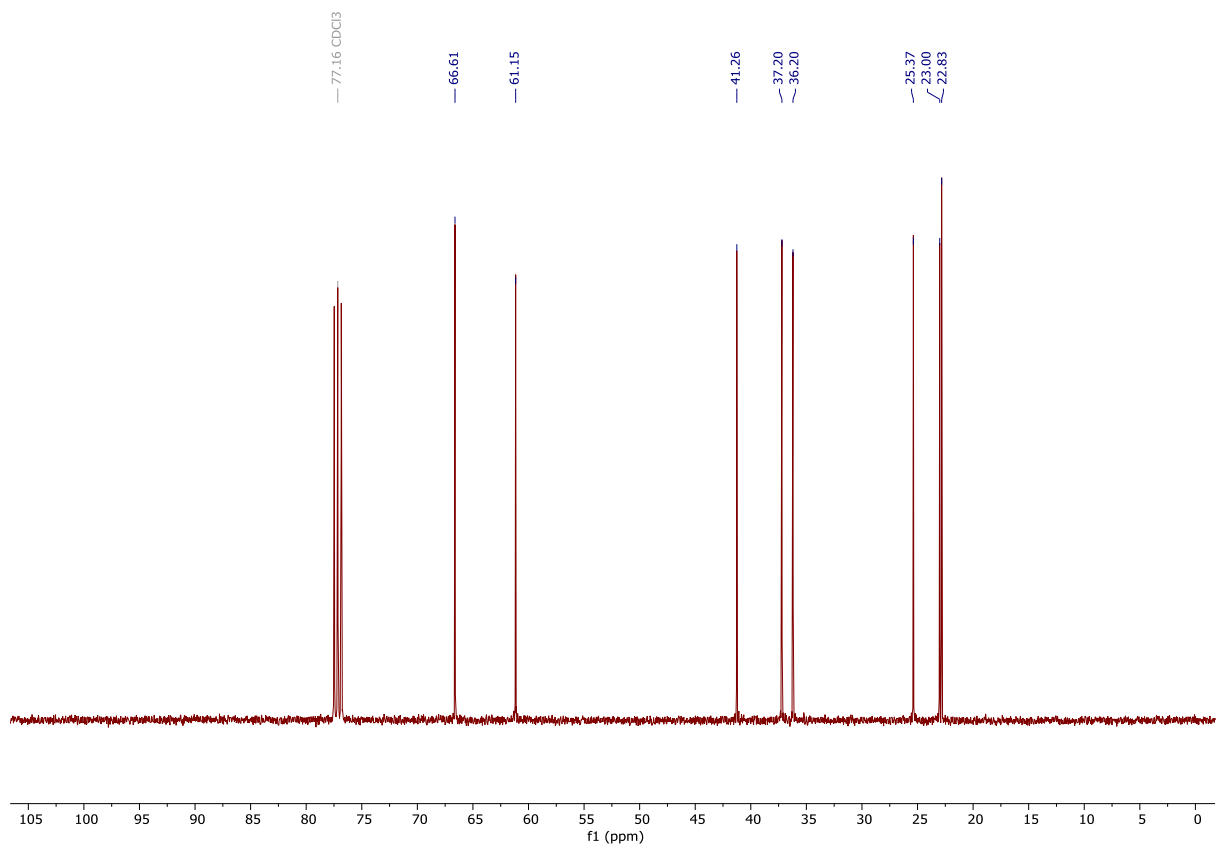

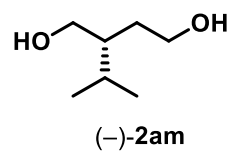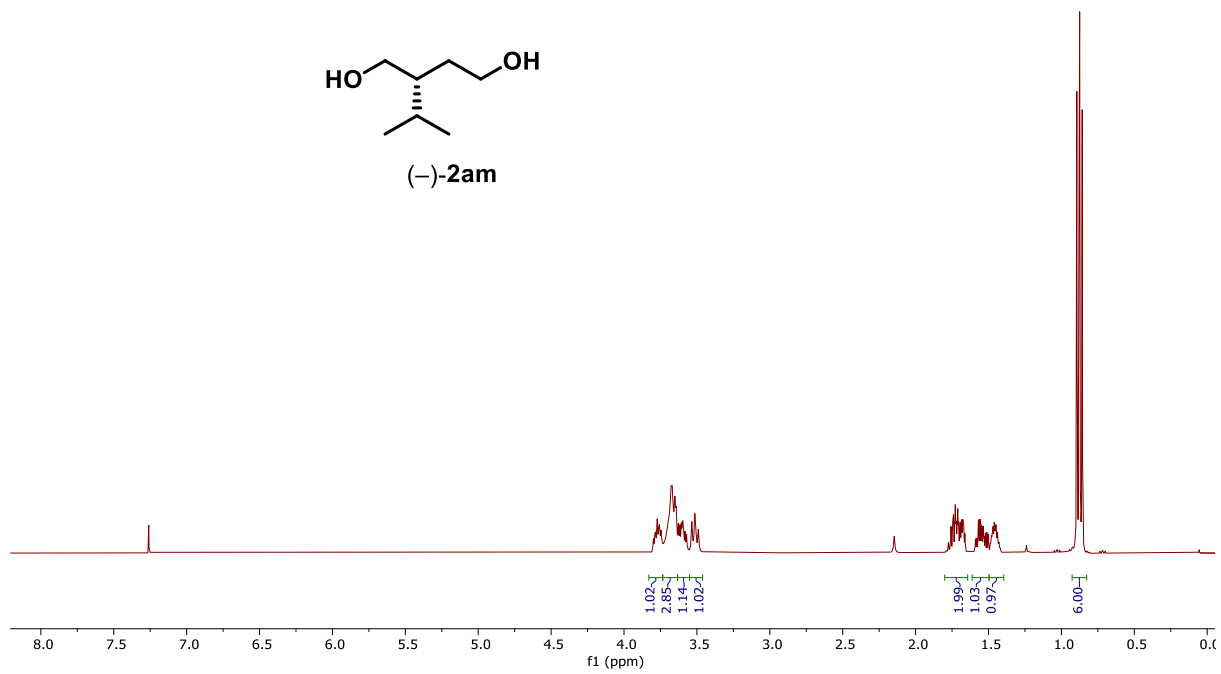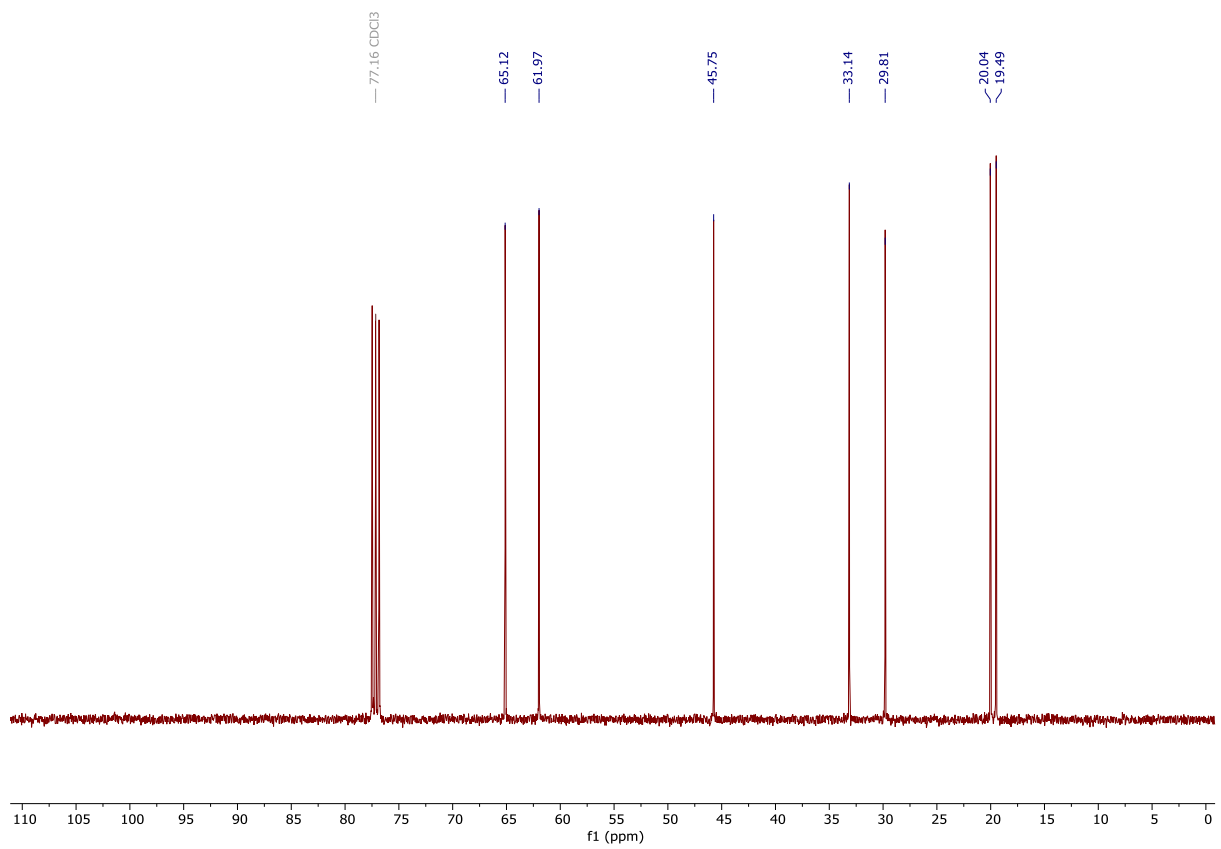

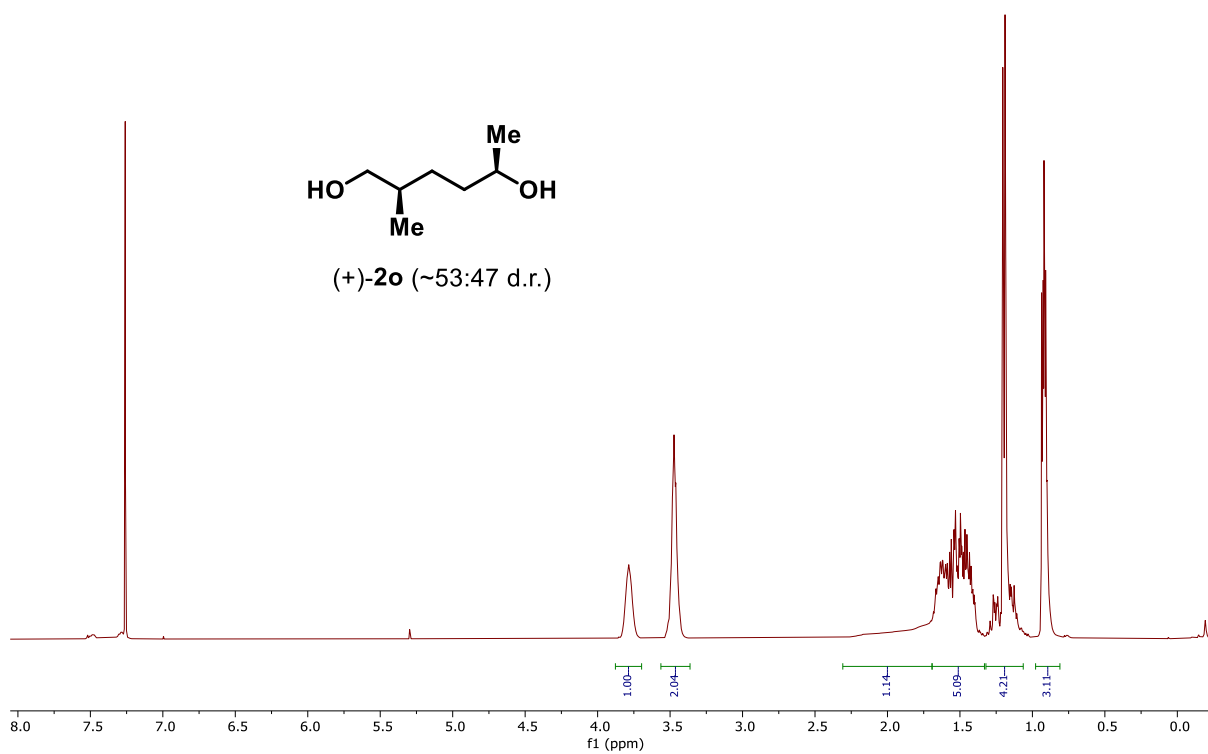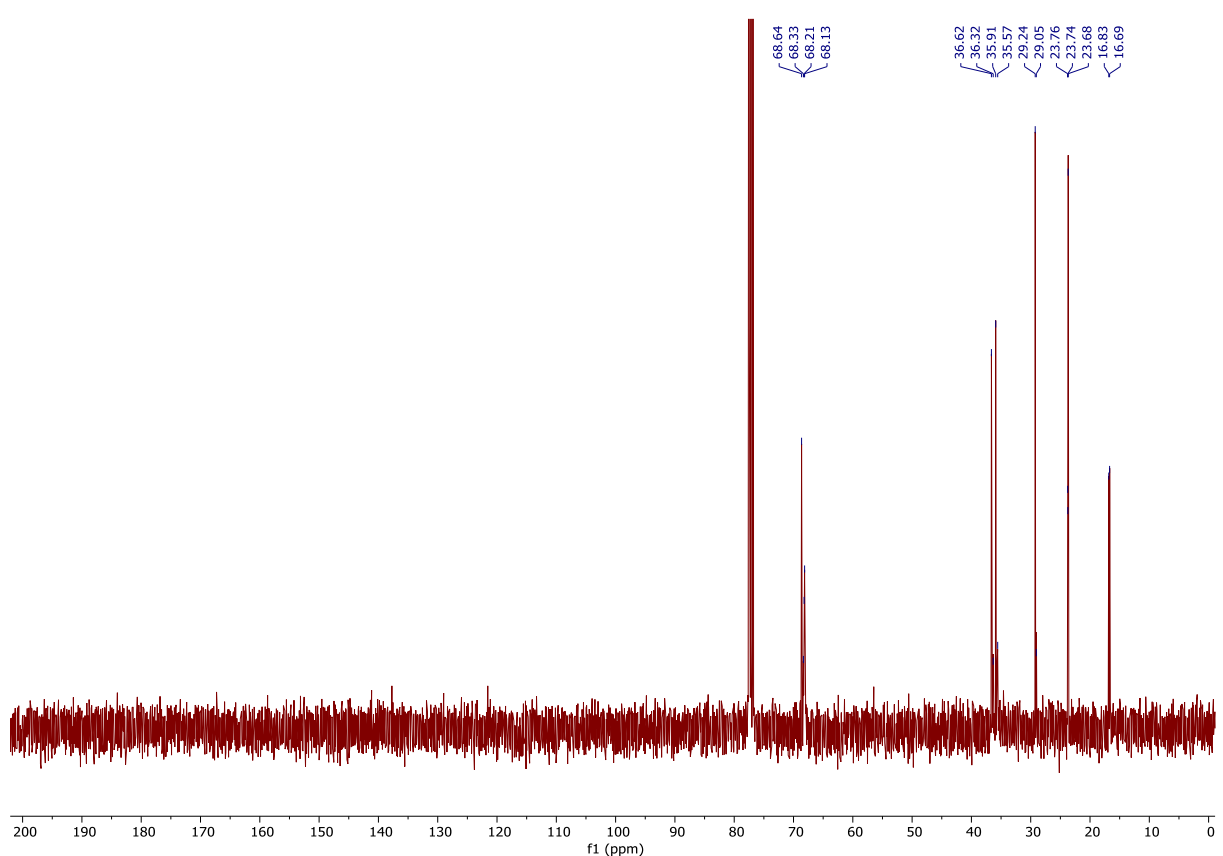

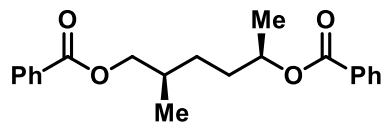

S1 (~53:47 d.r.)

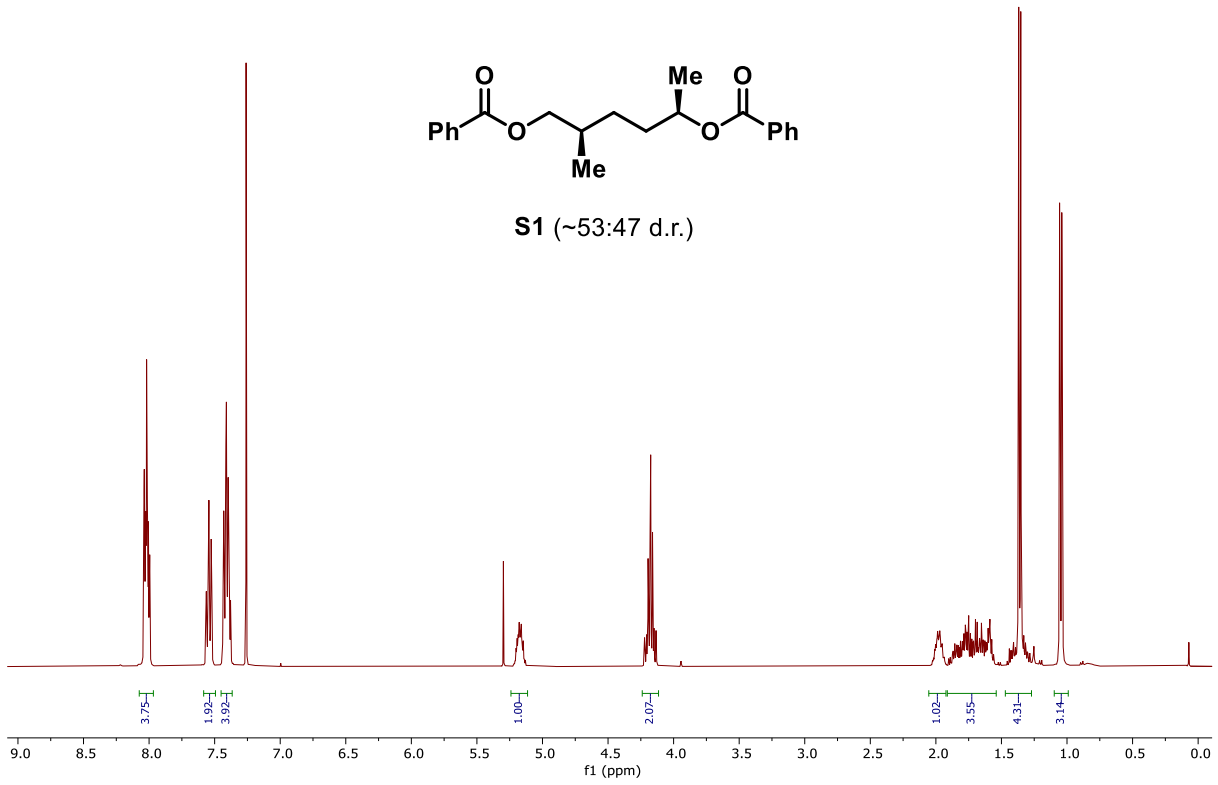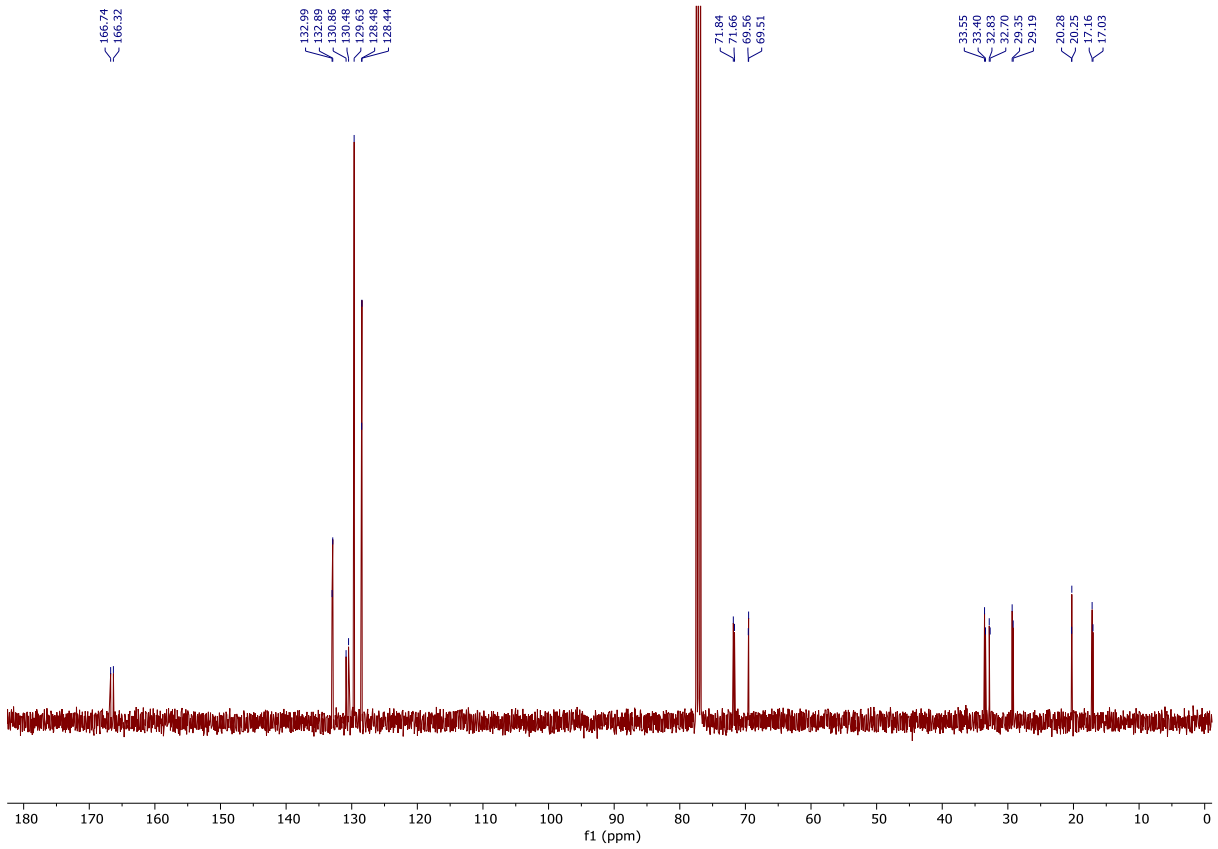

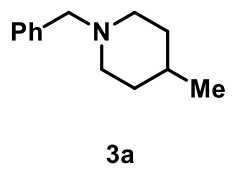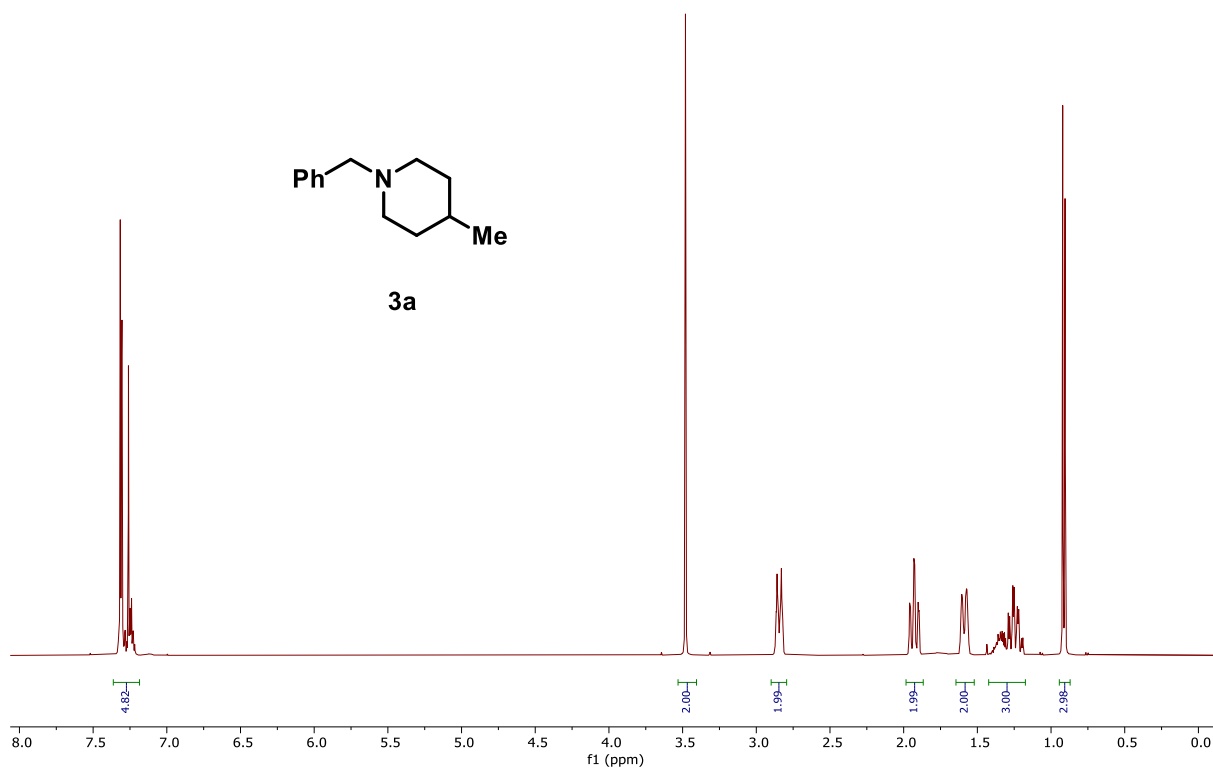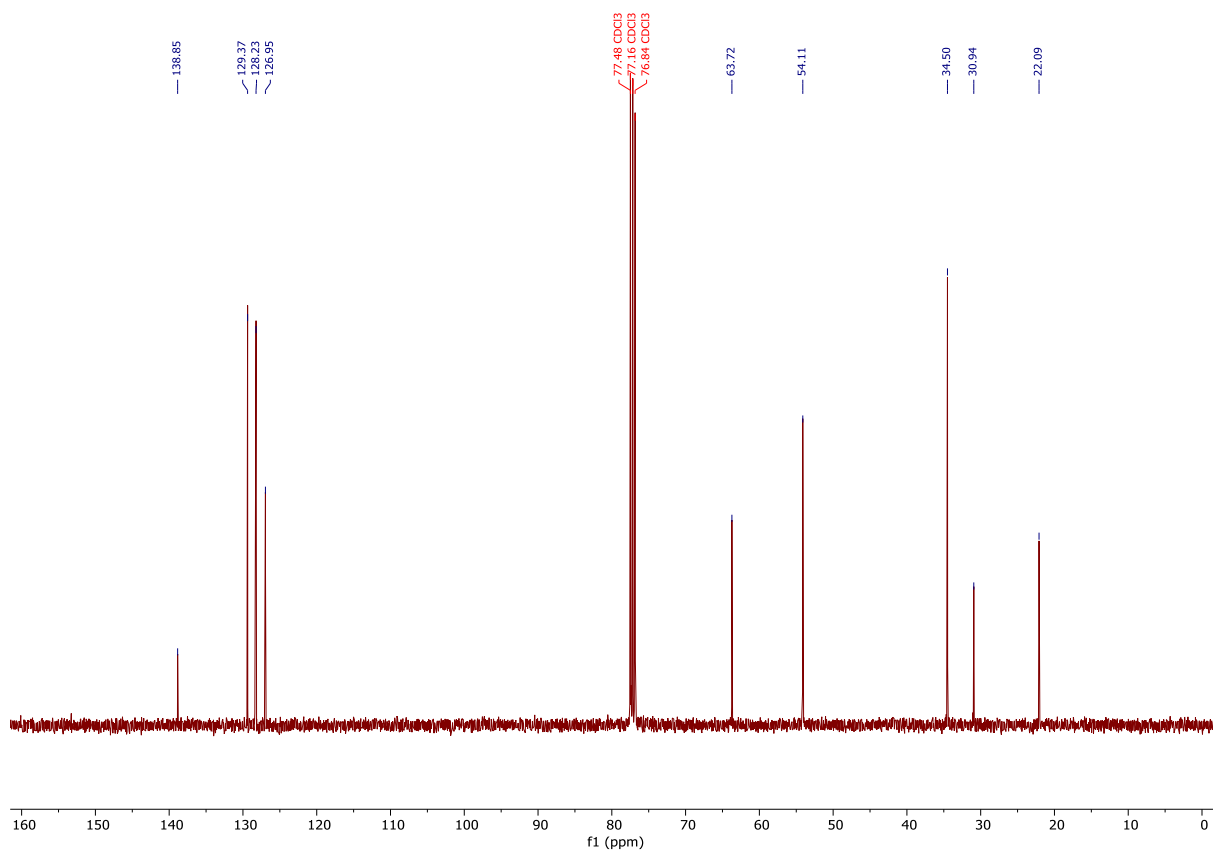



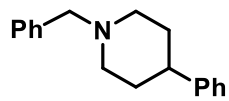

3b

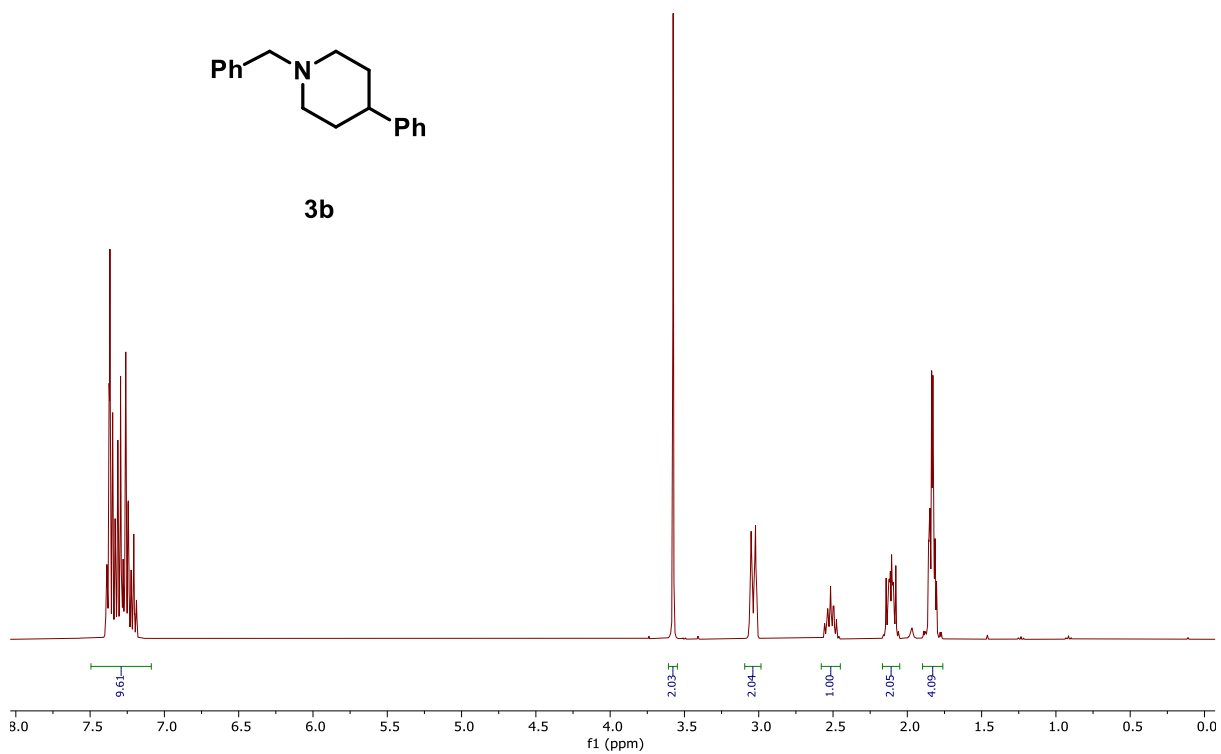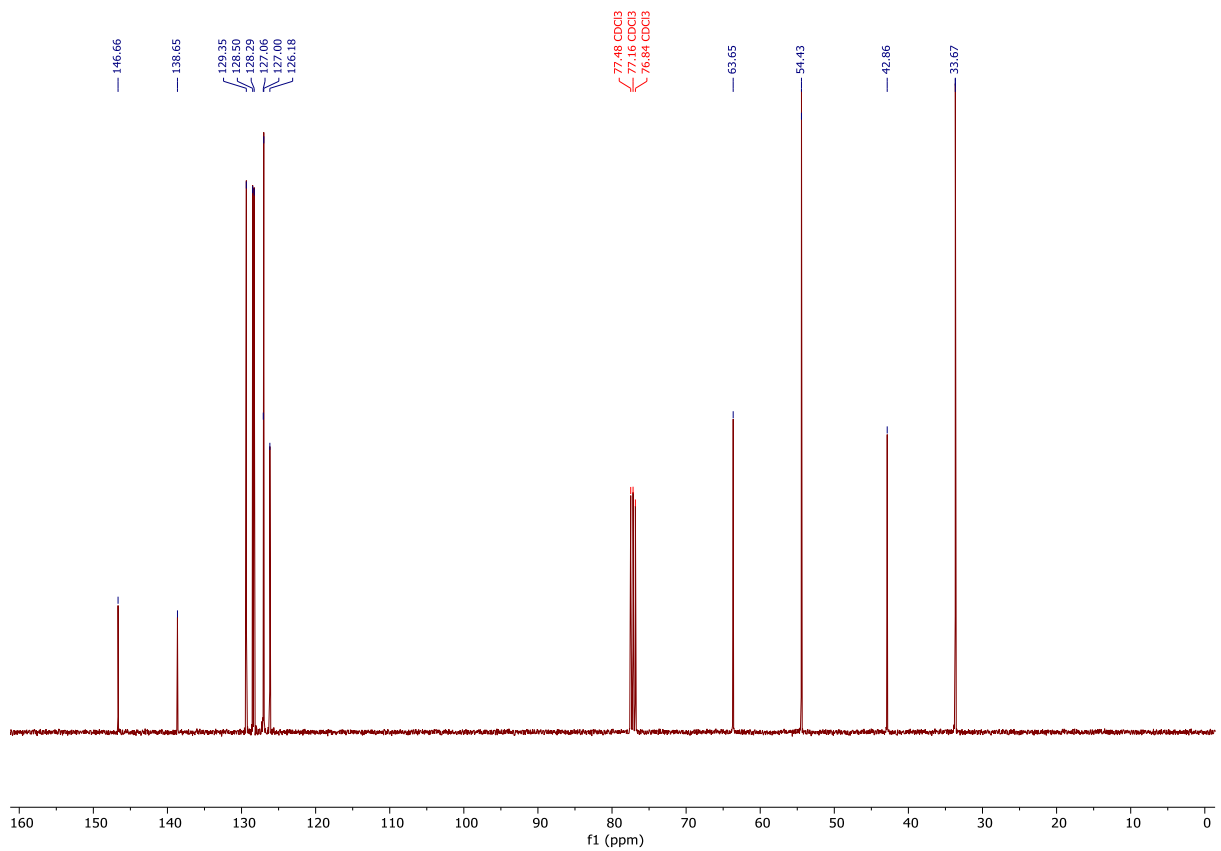

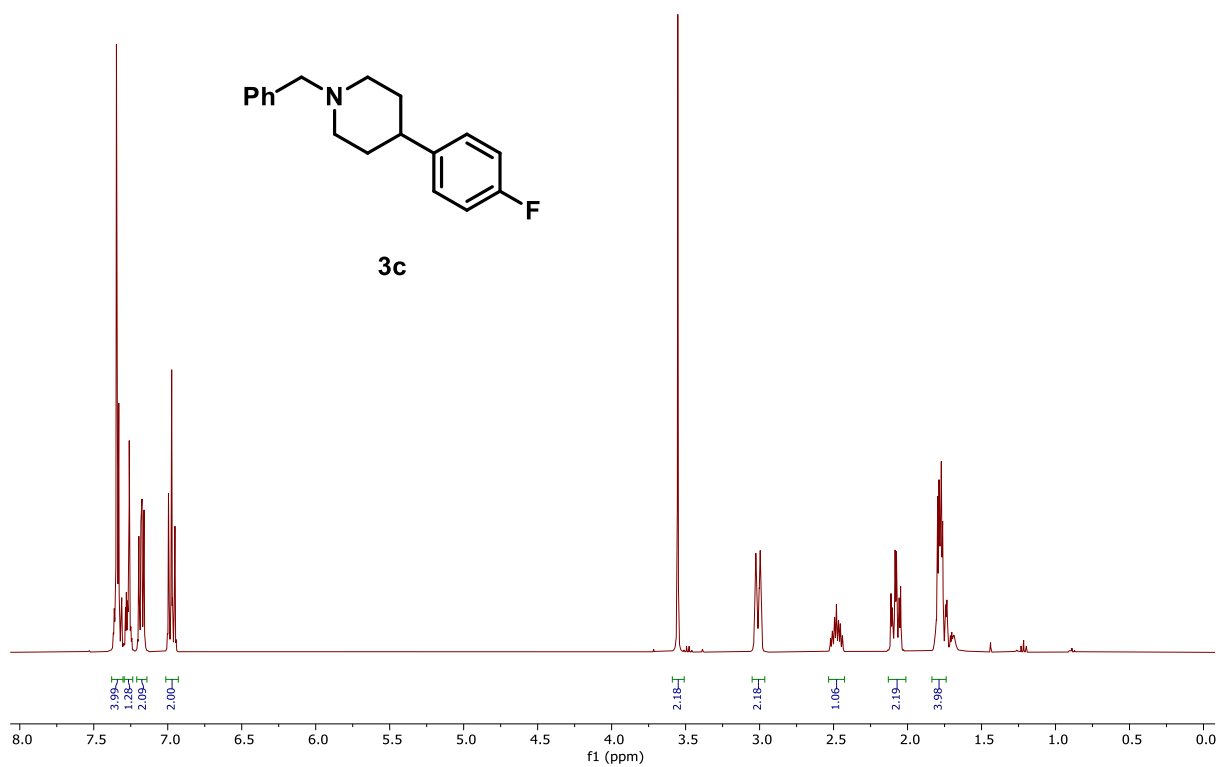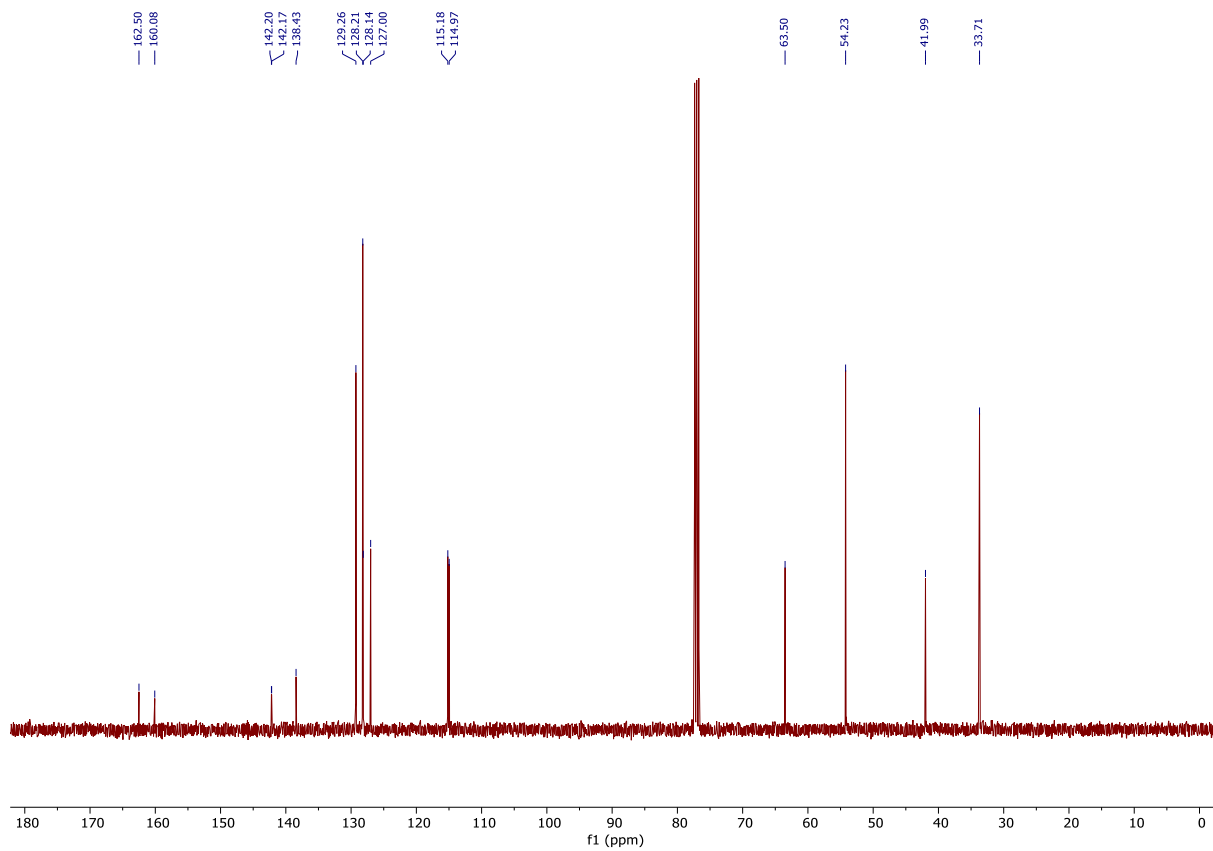

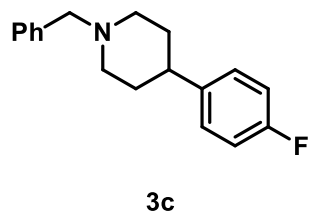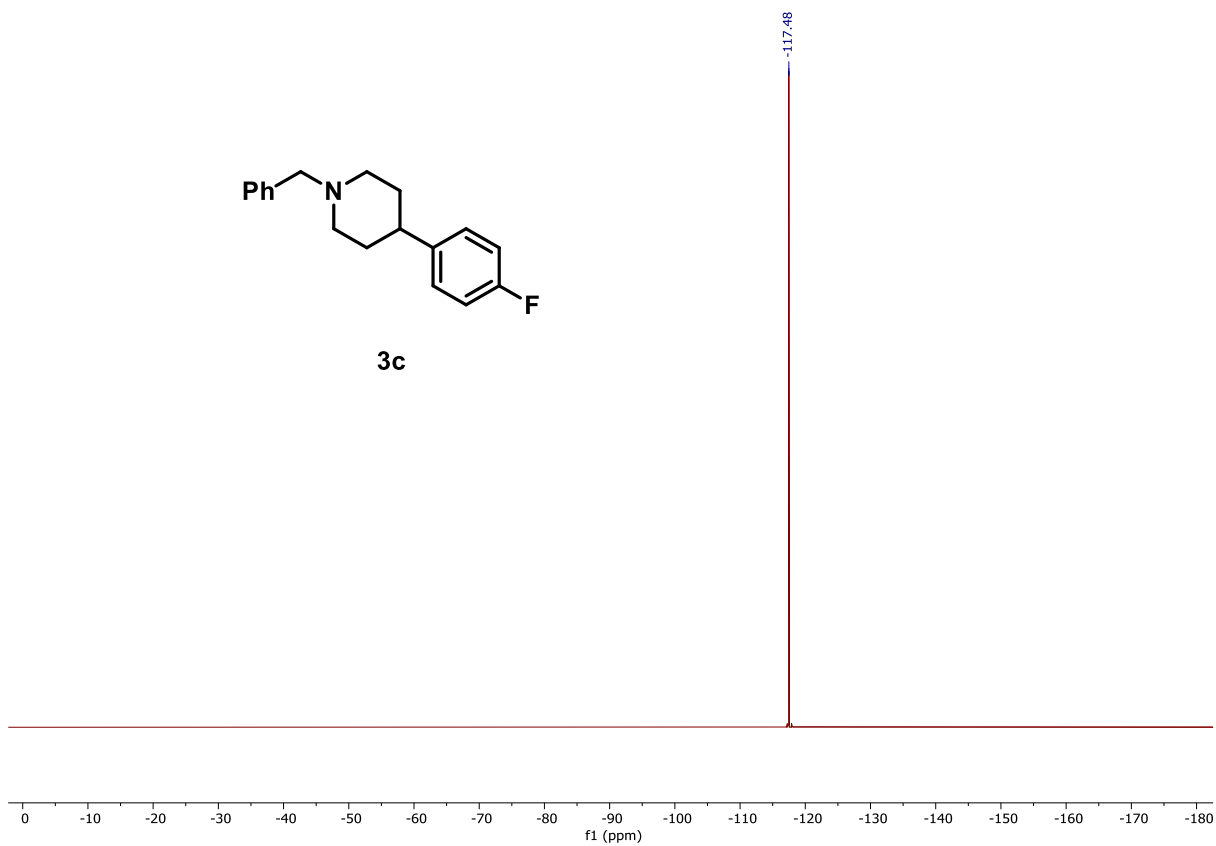

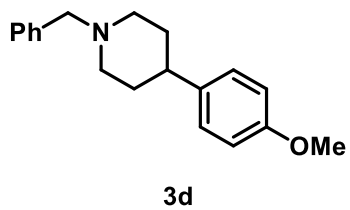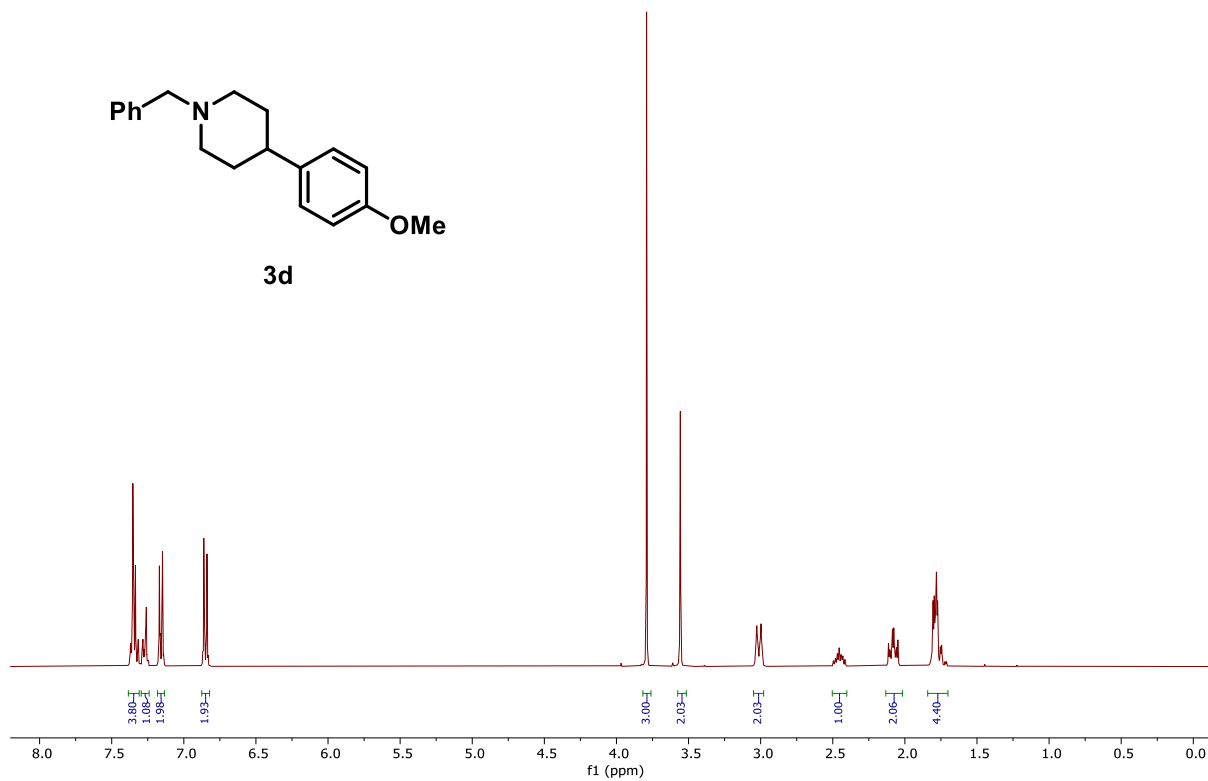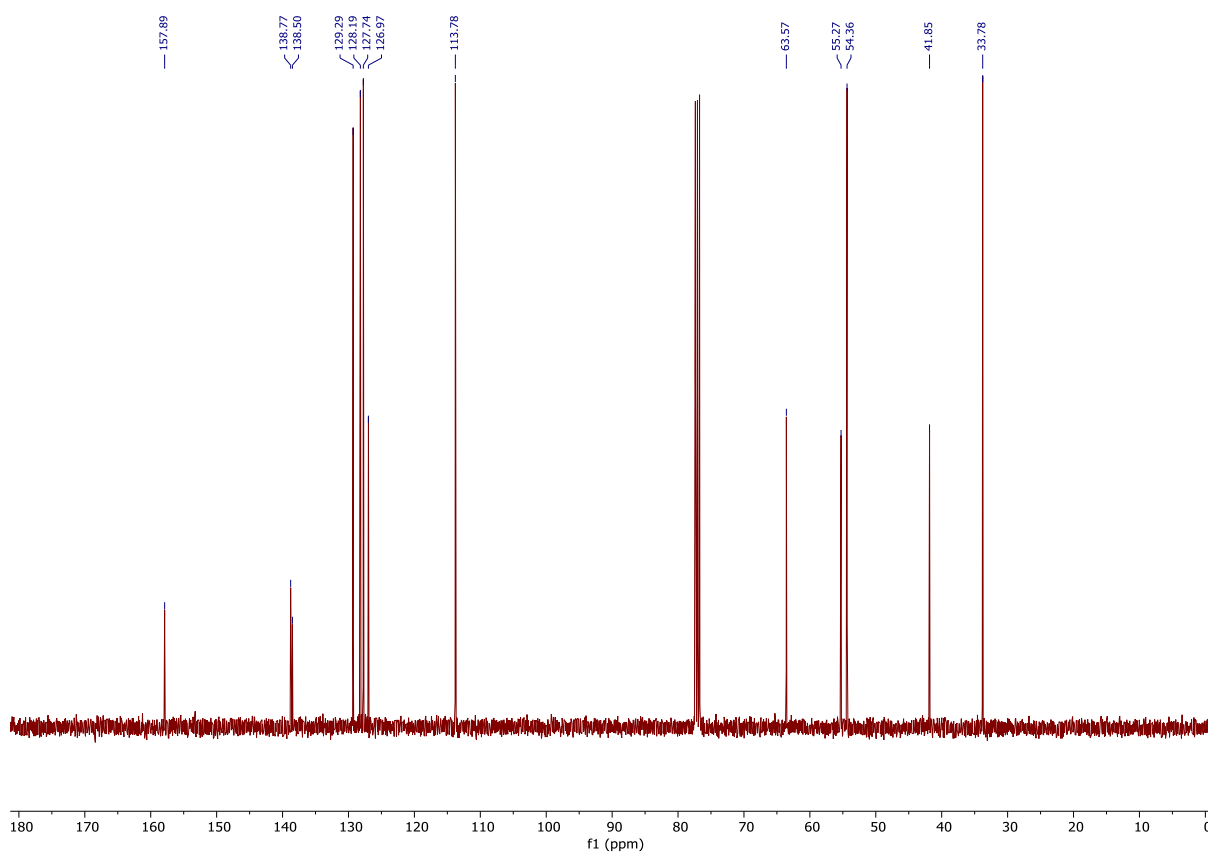

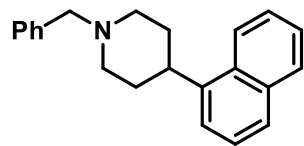

3e

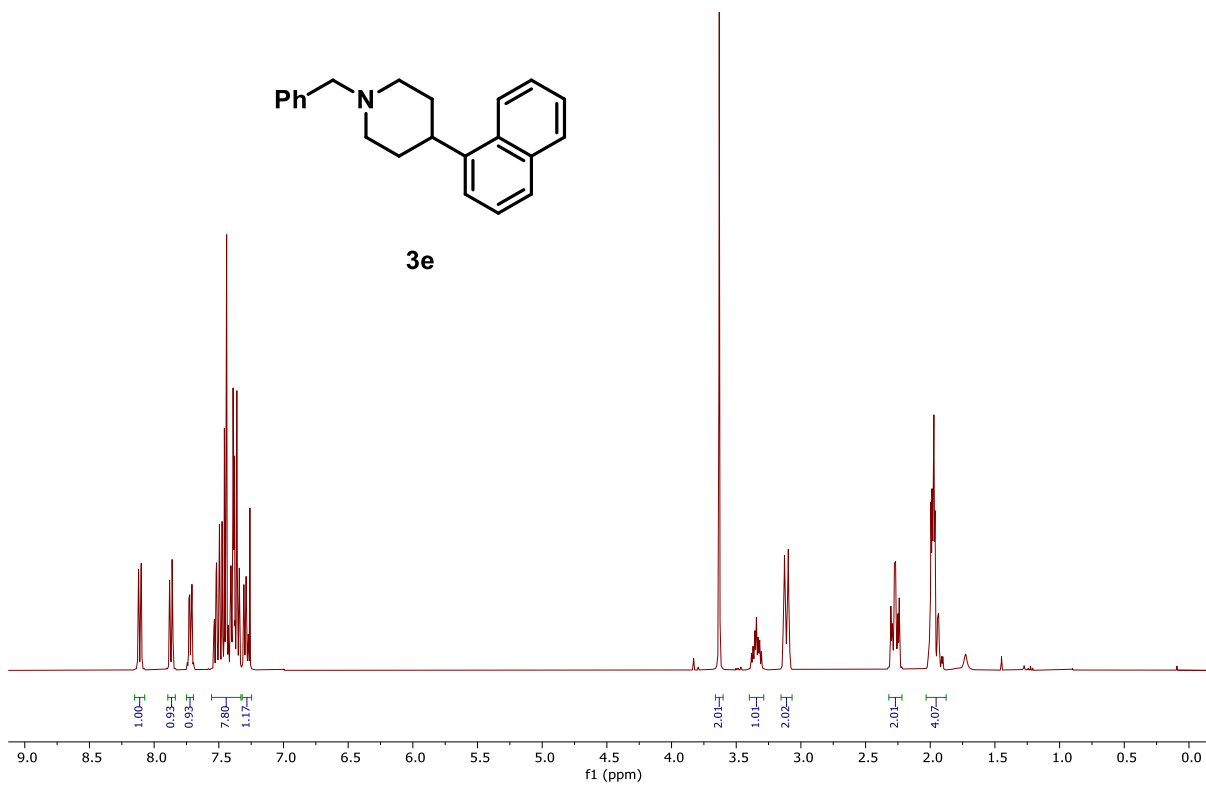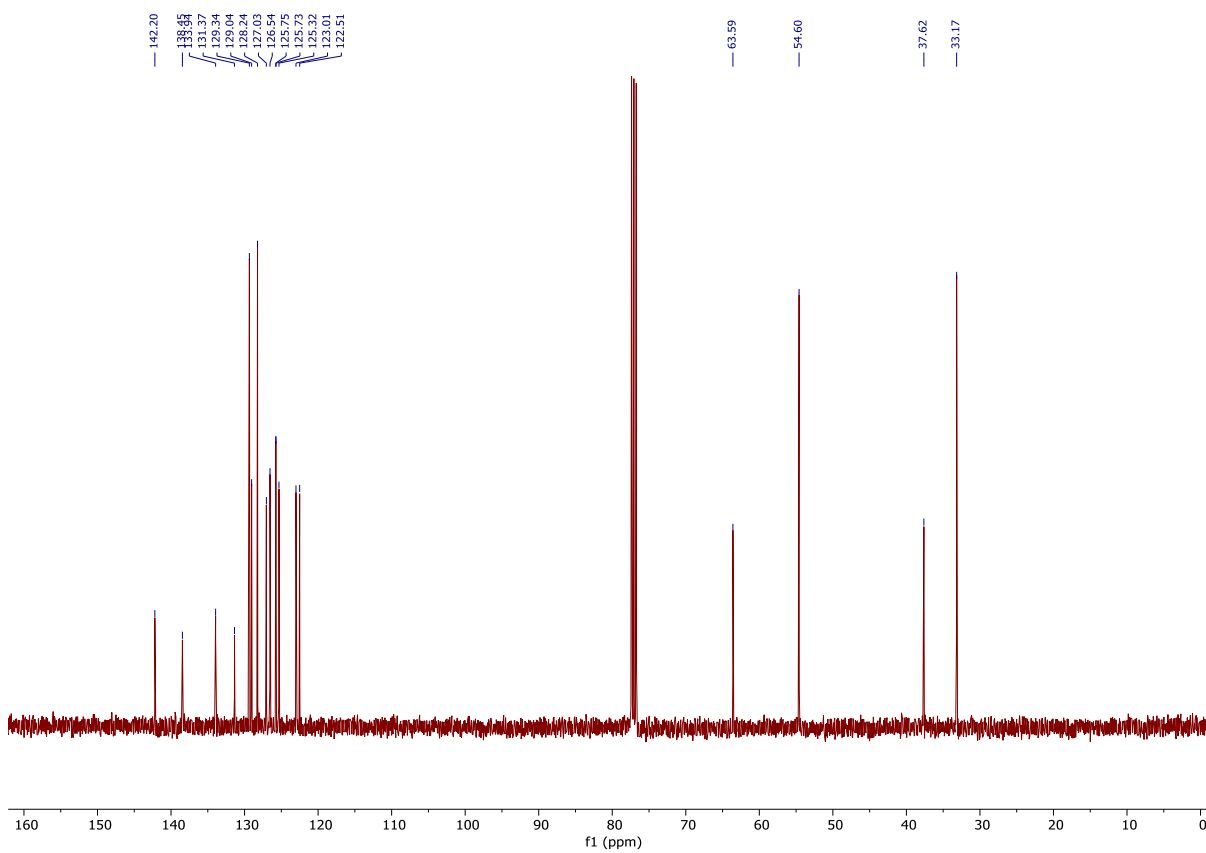

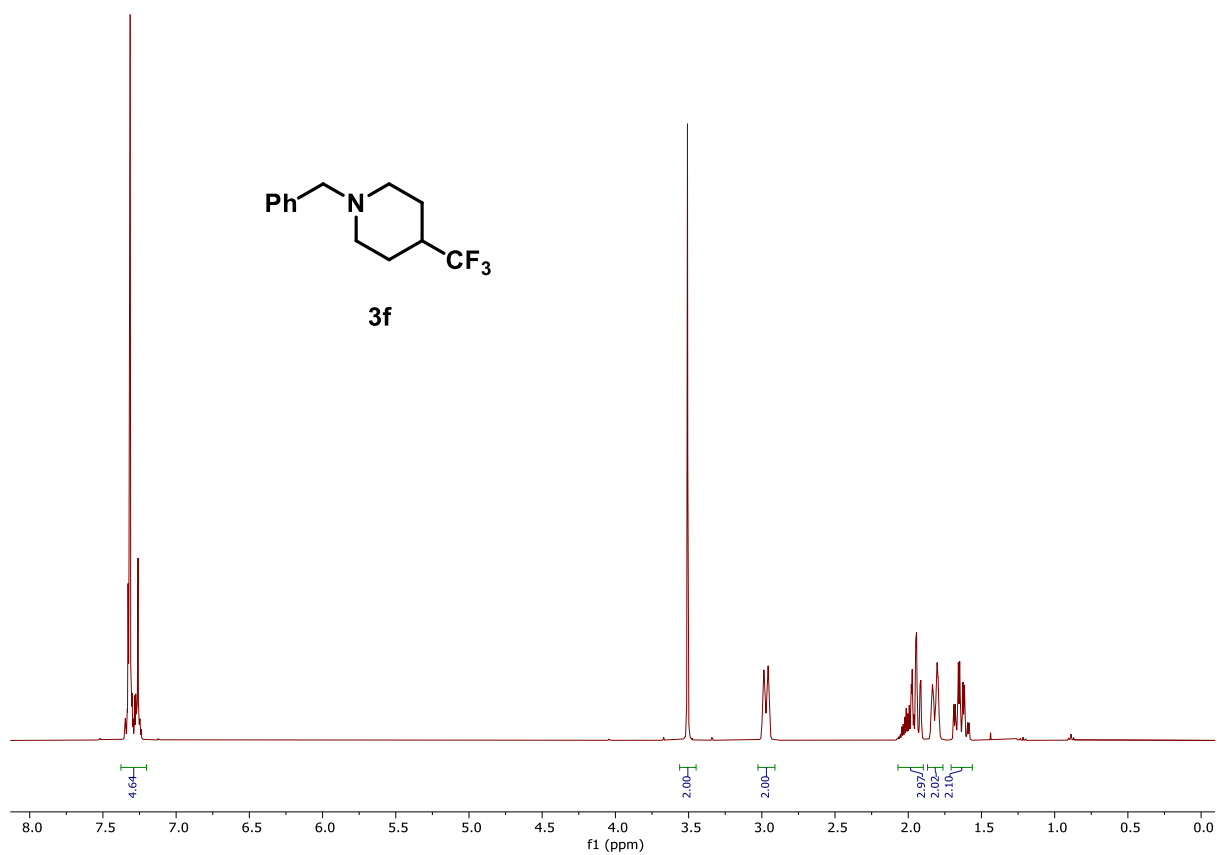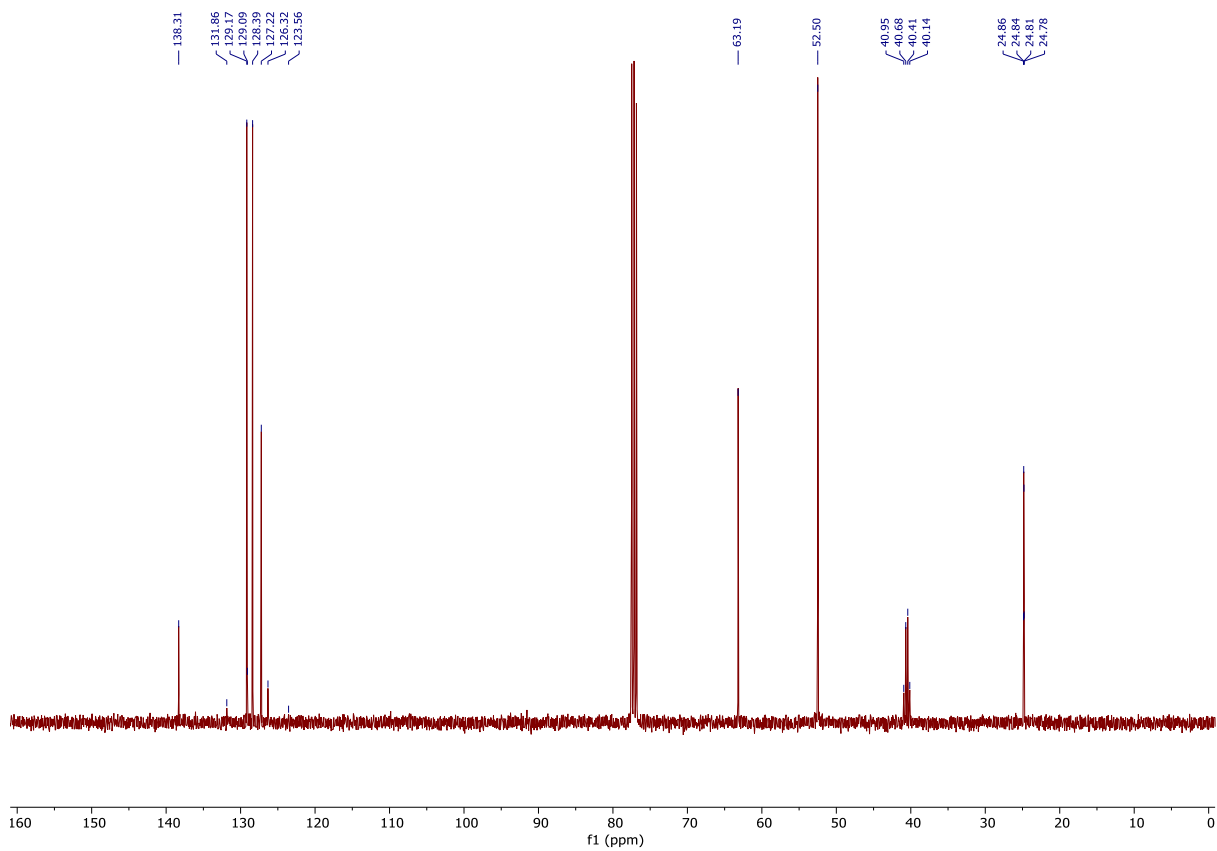

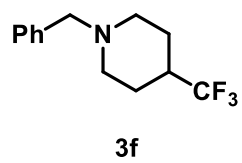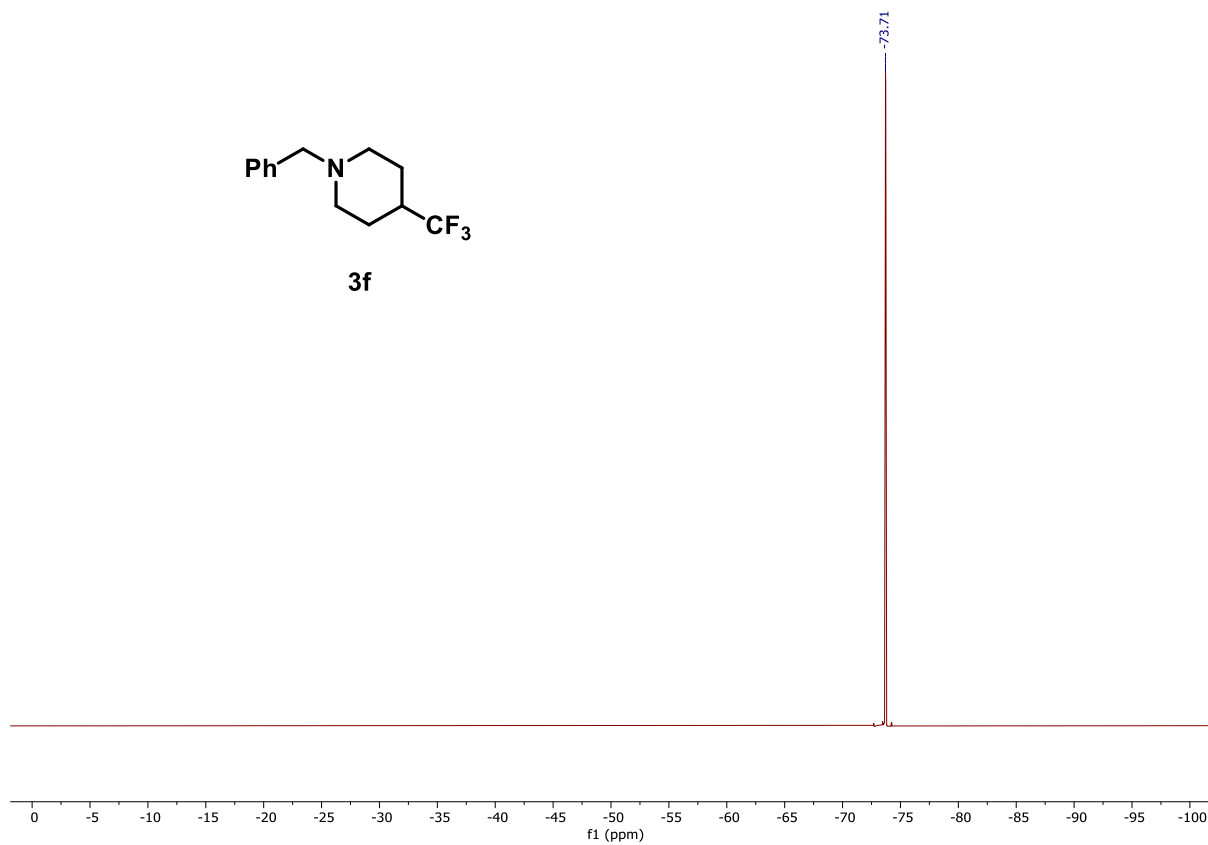

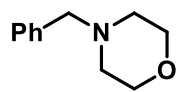

3g

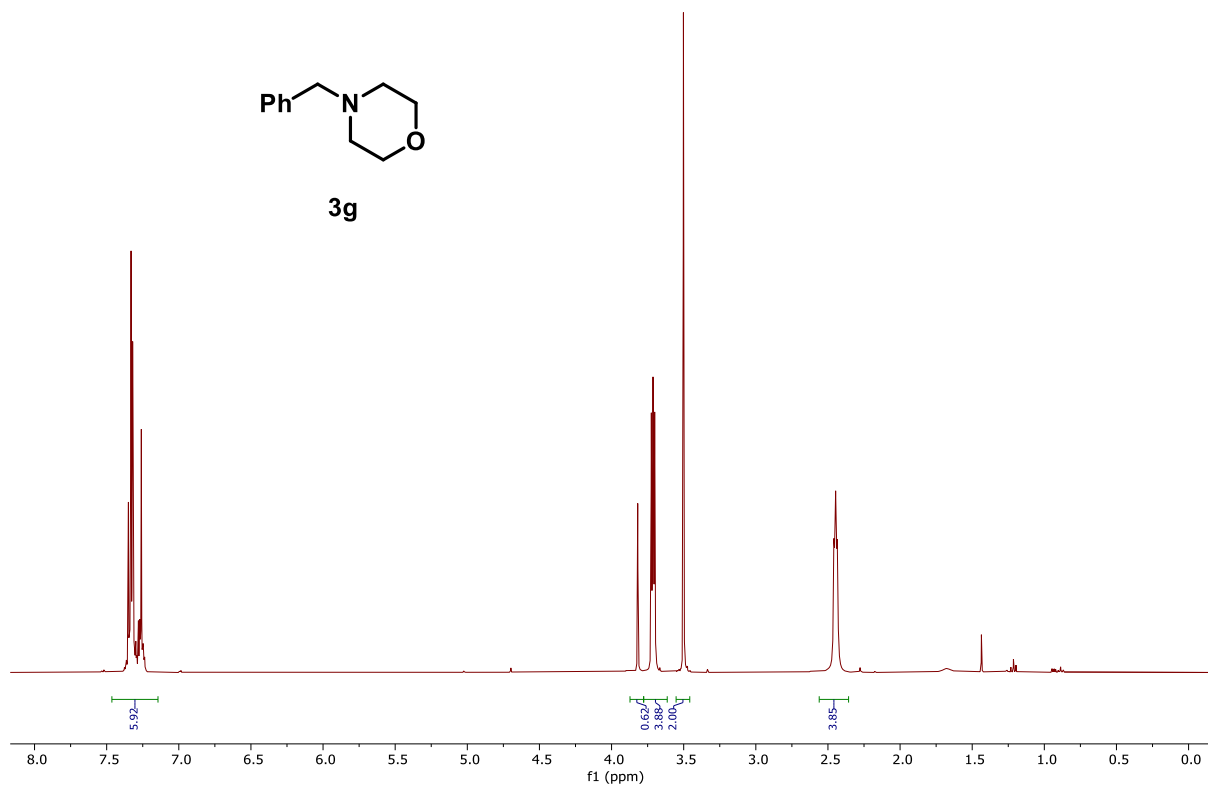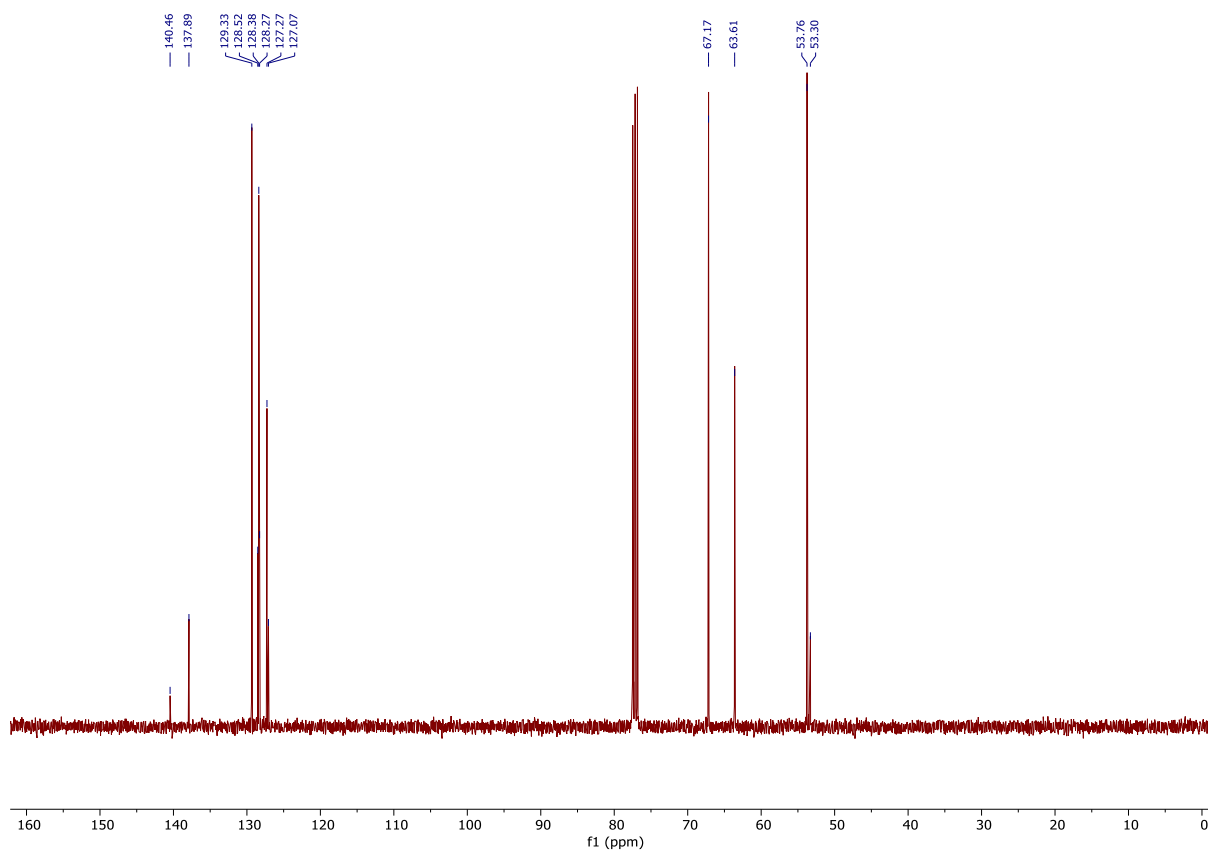



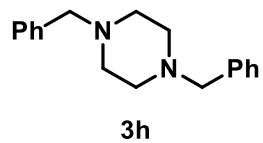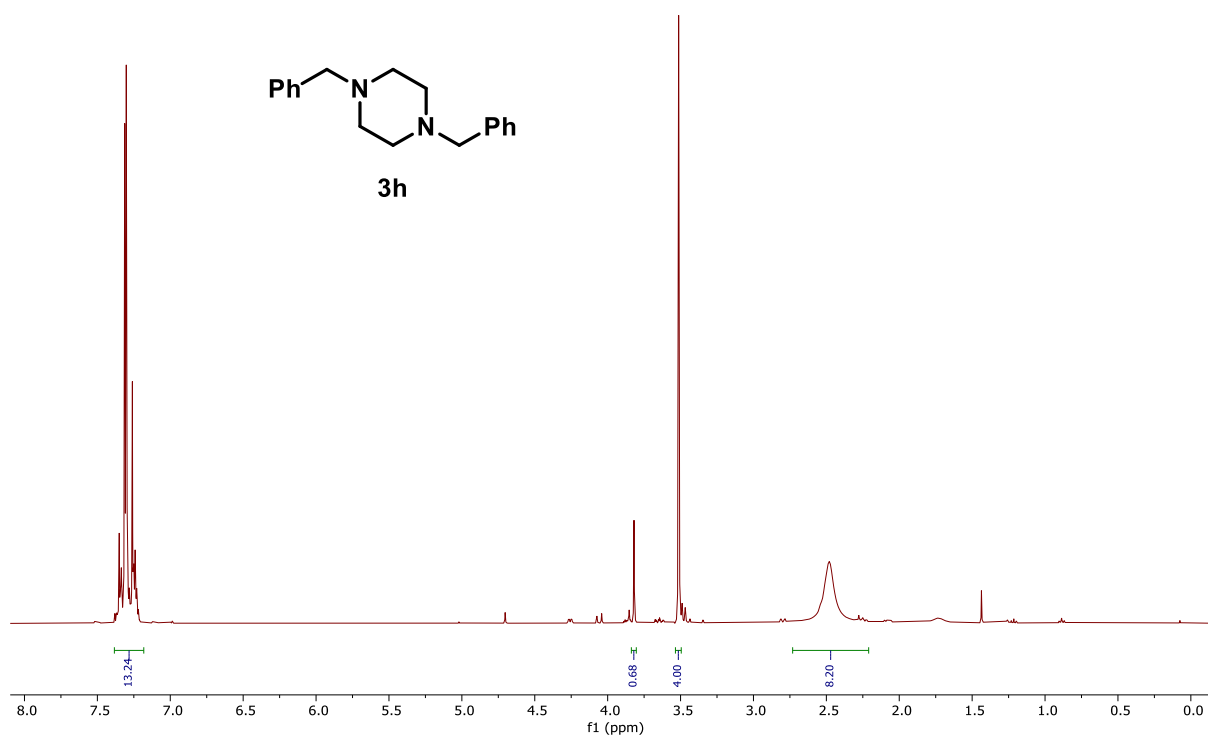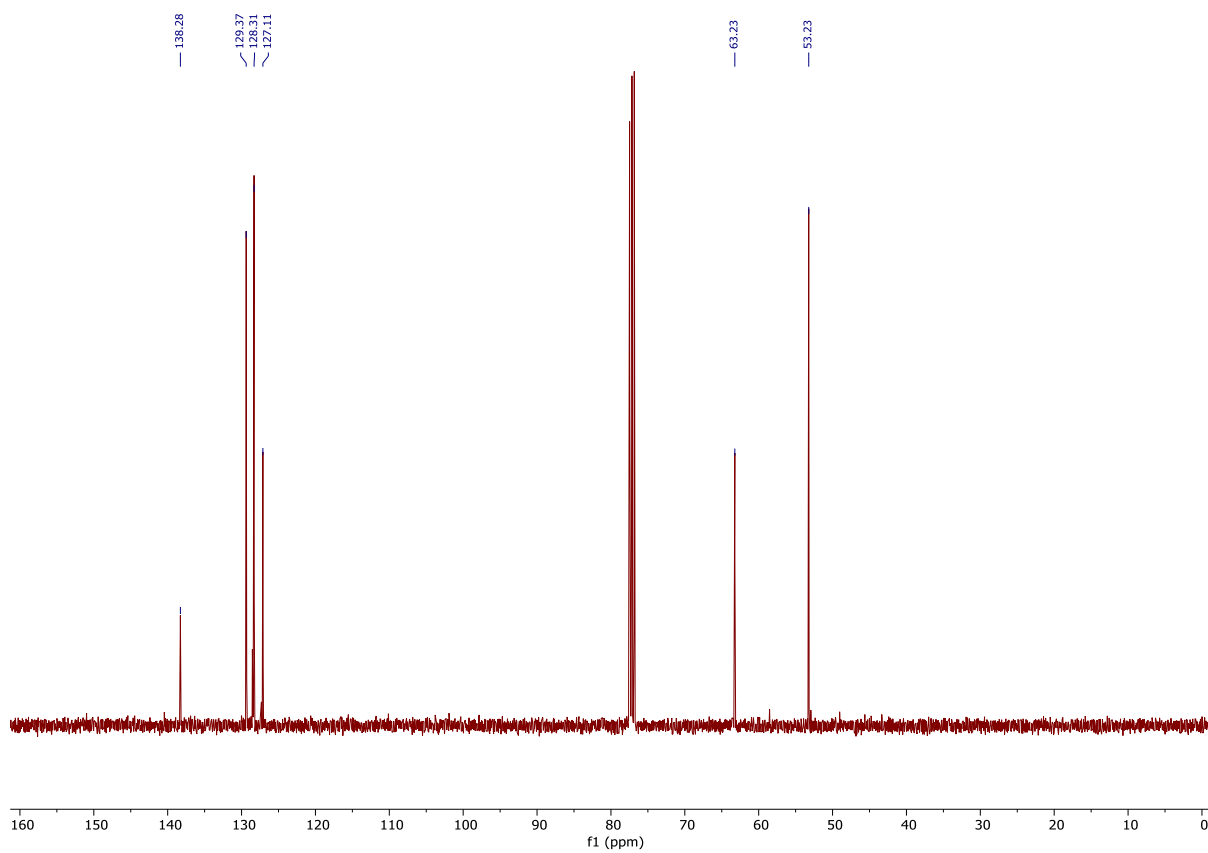

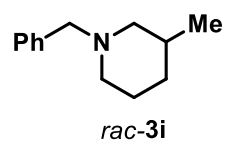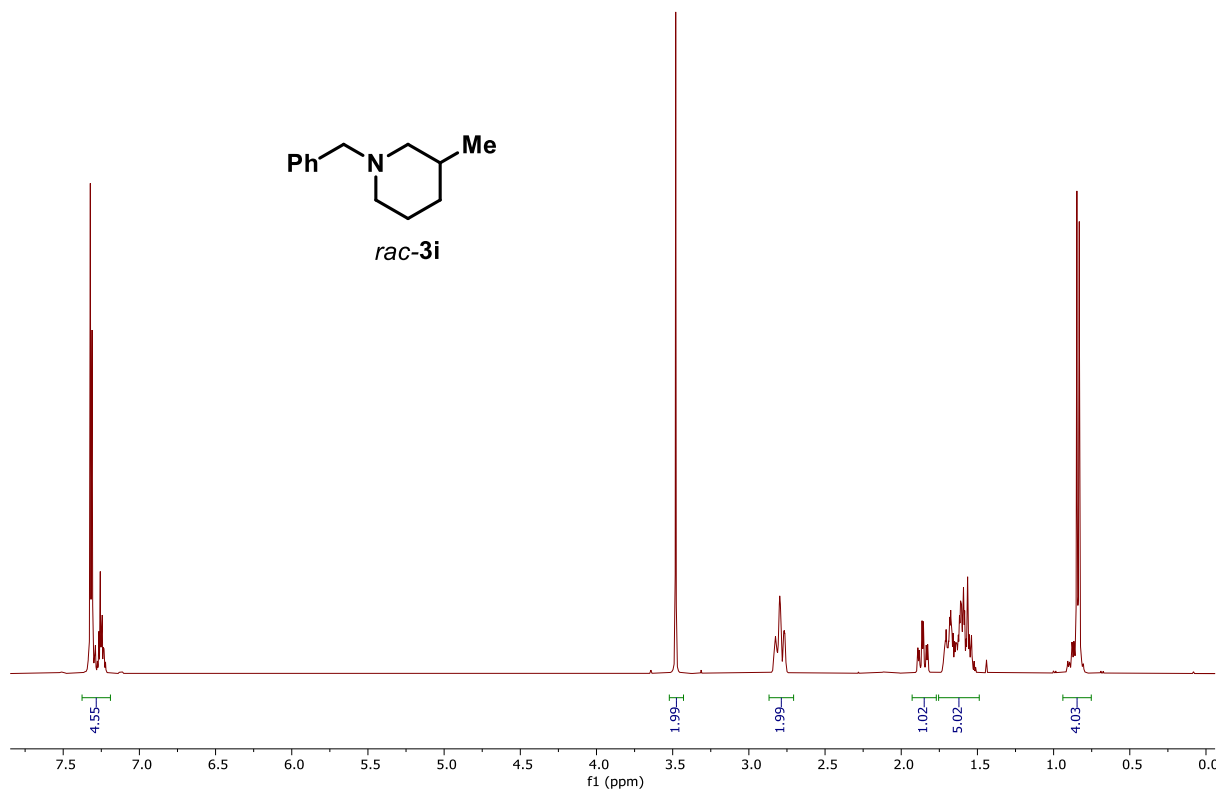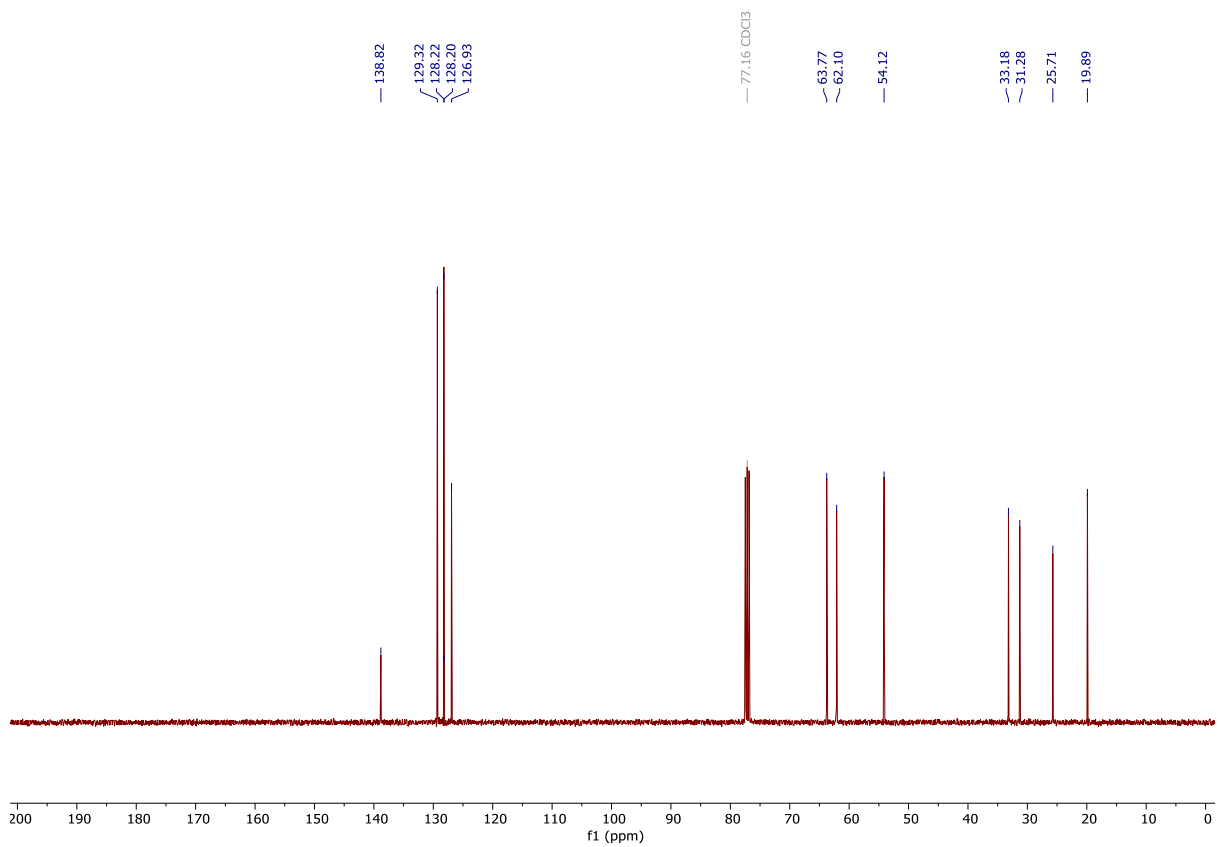

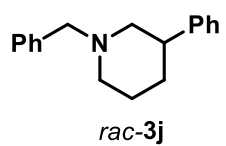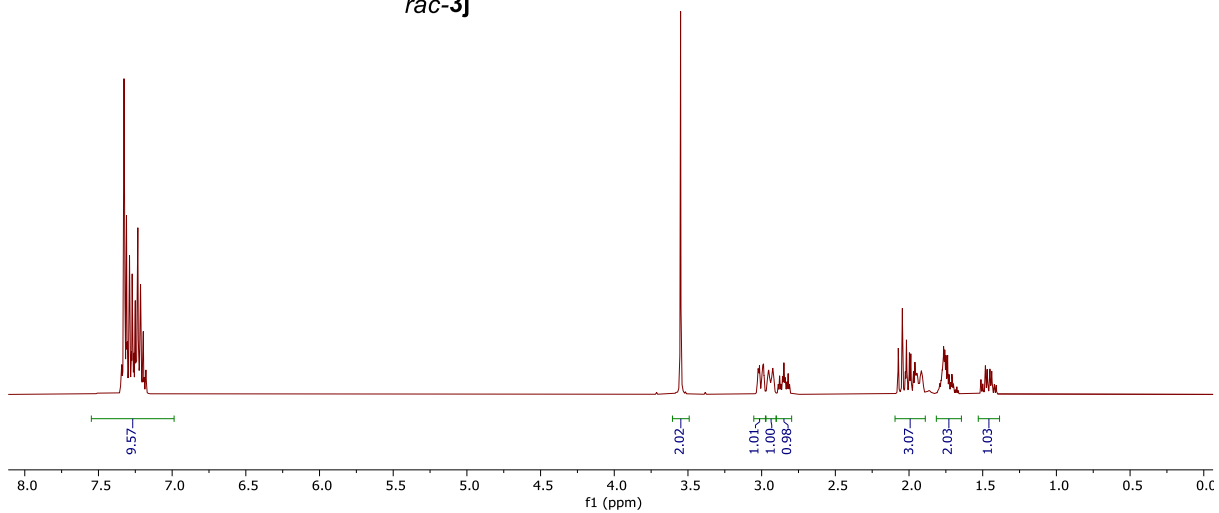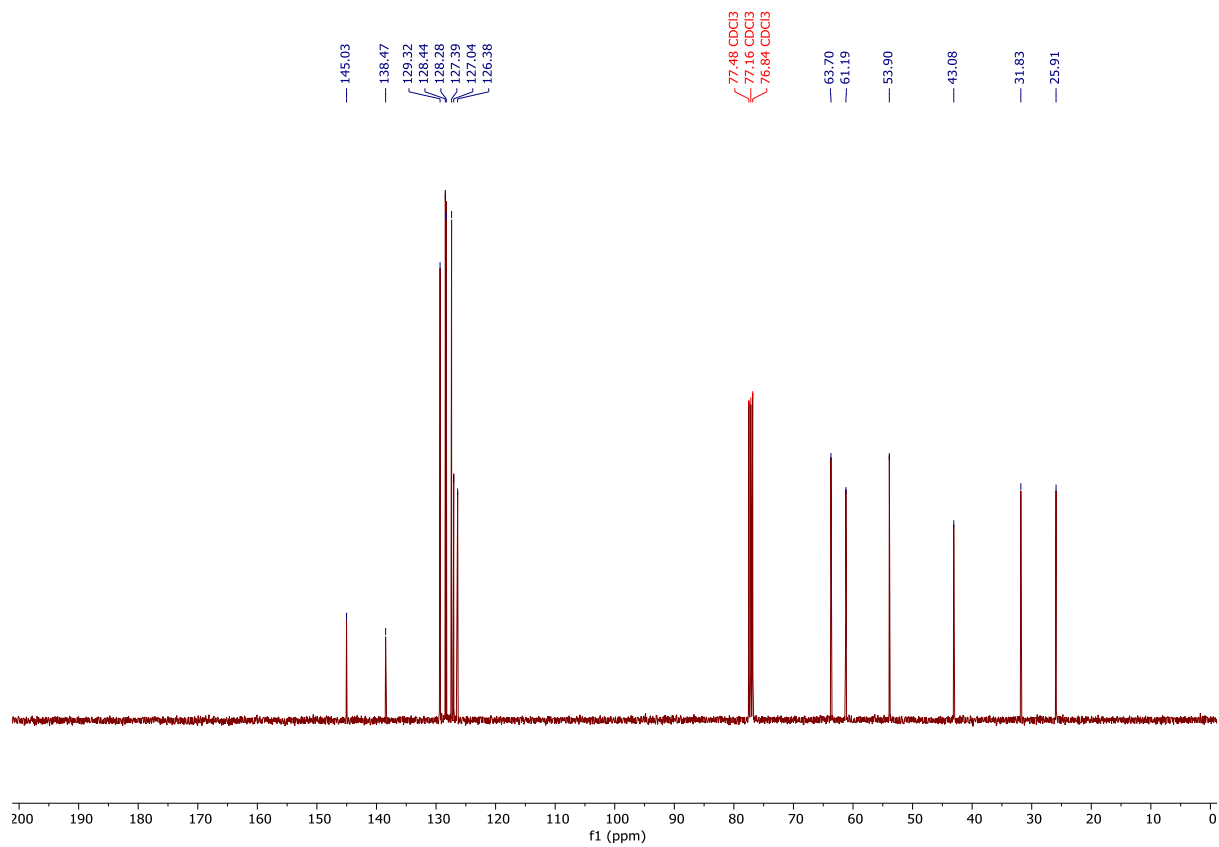

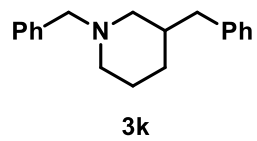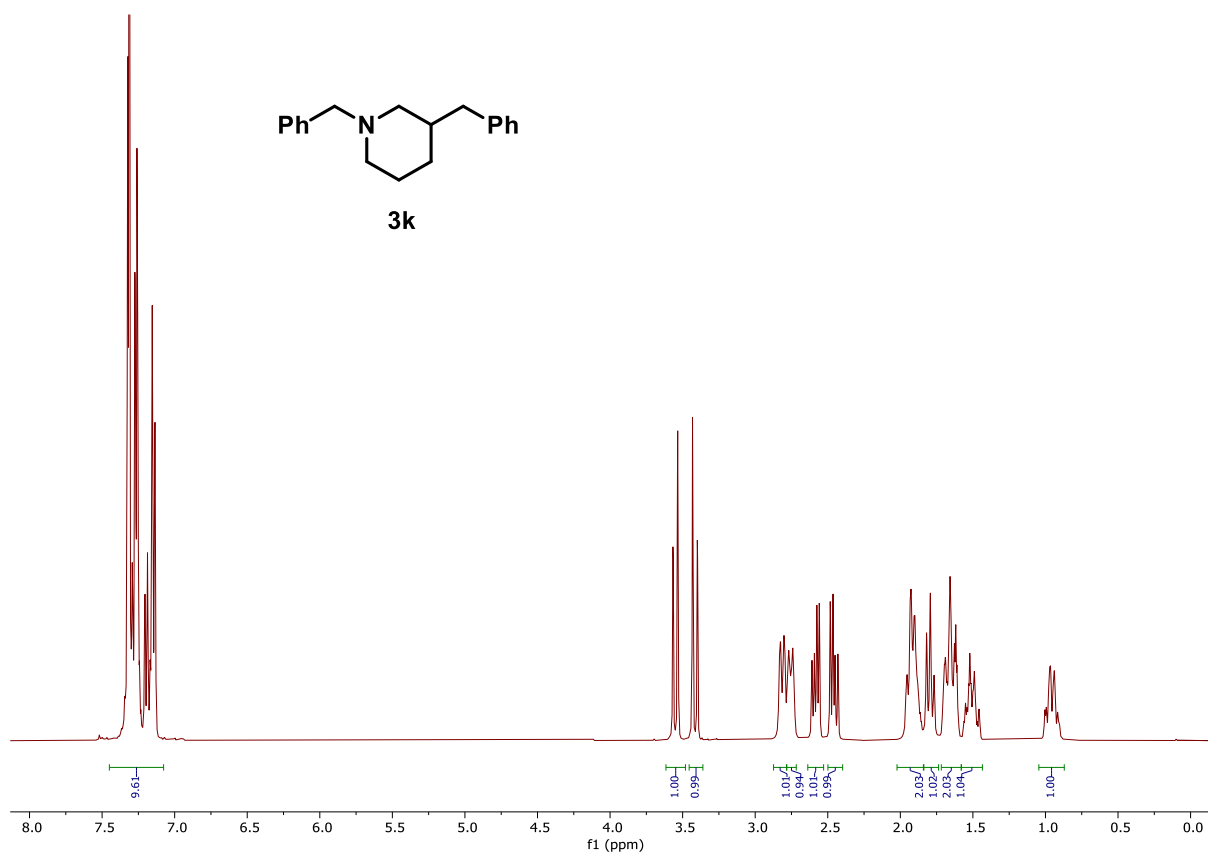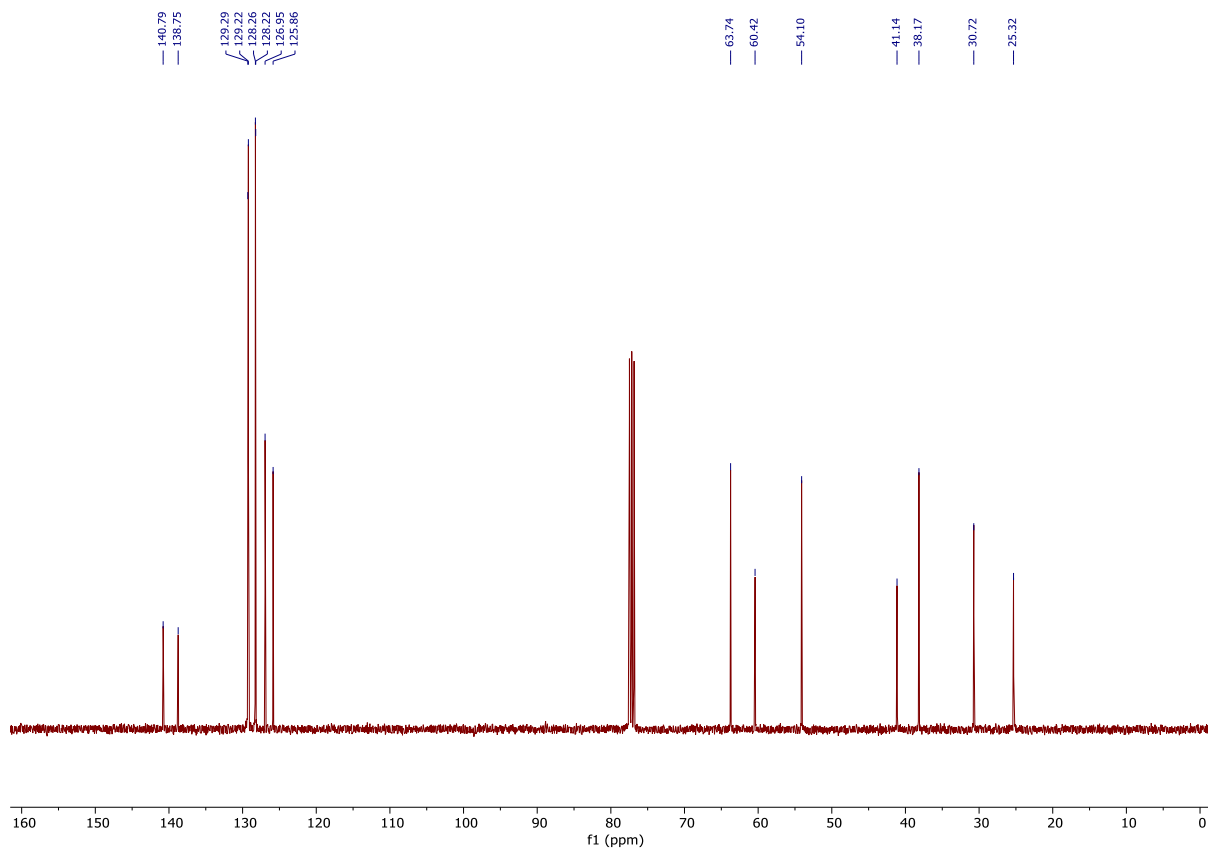

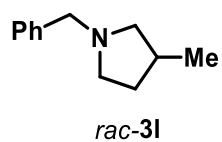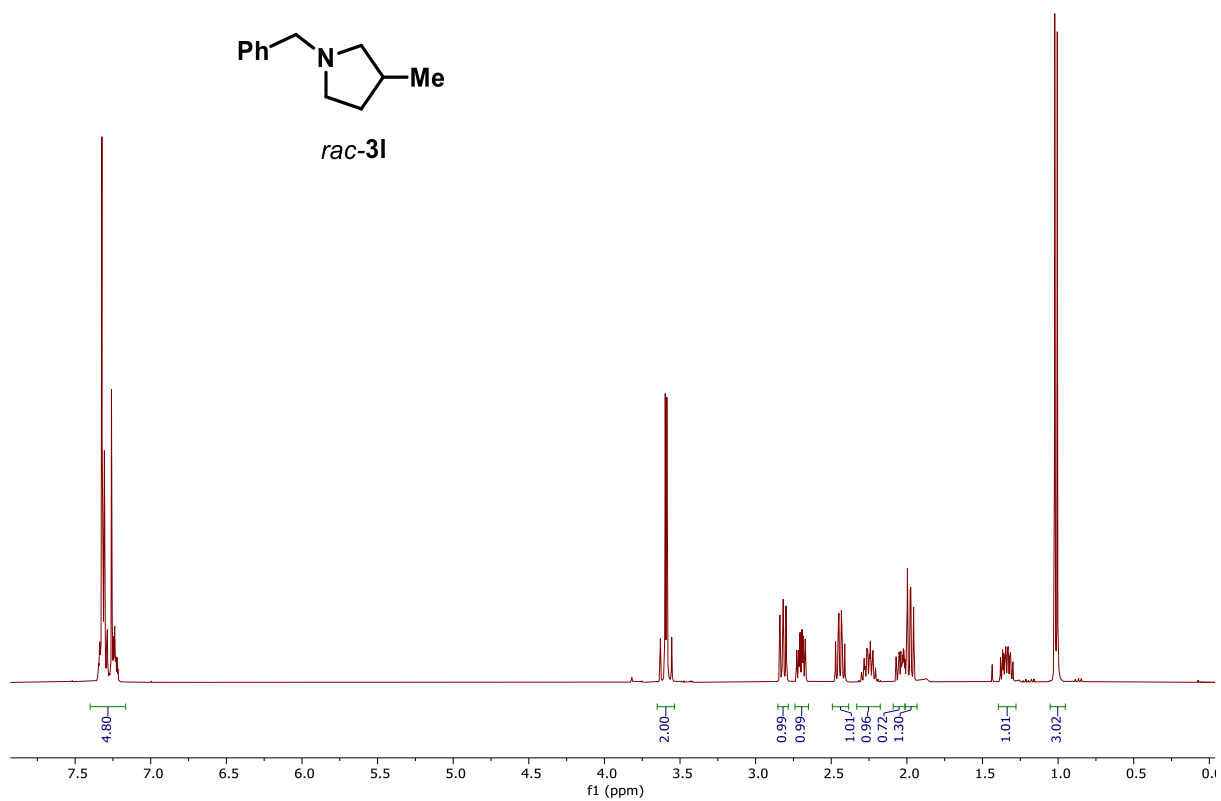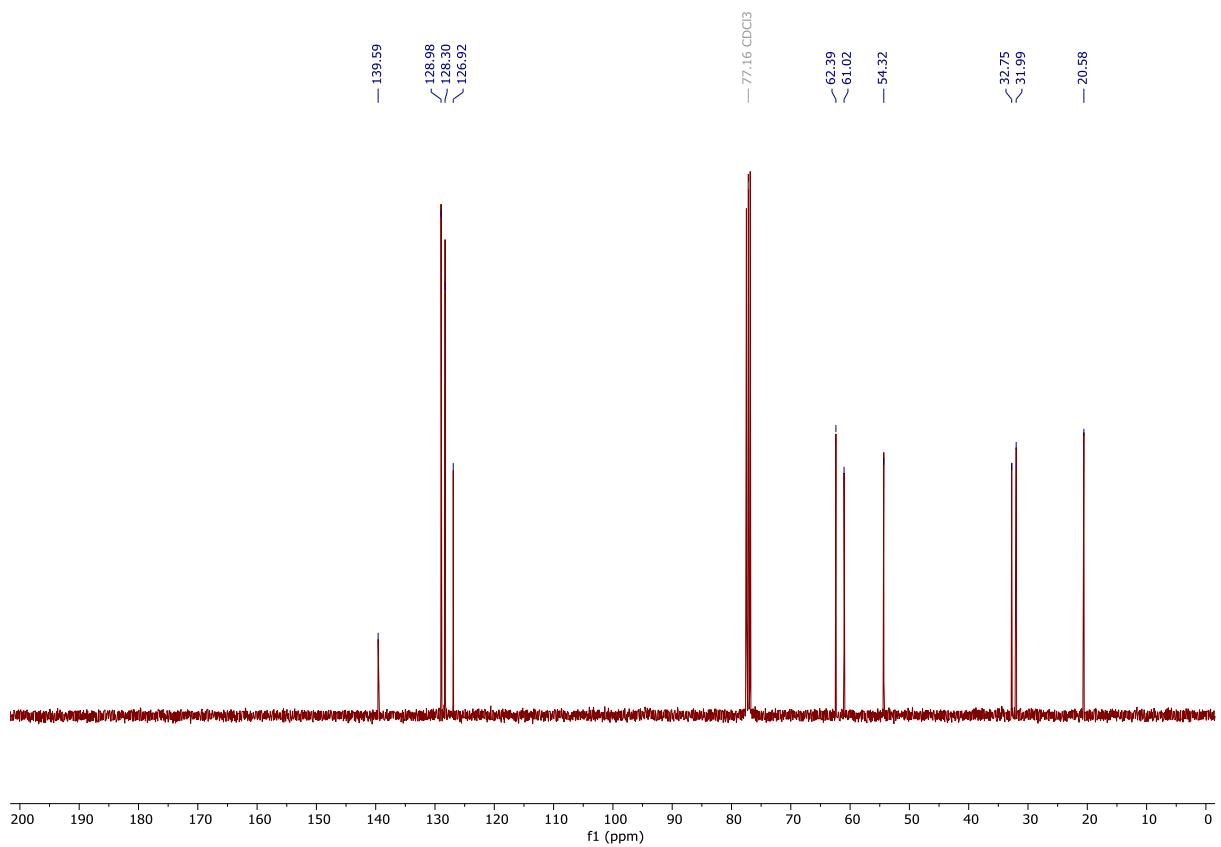

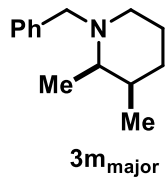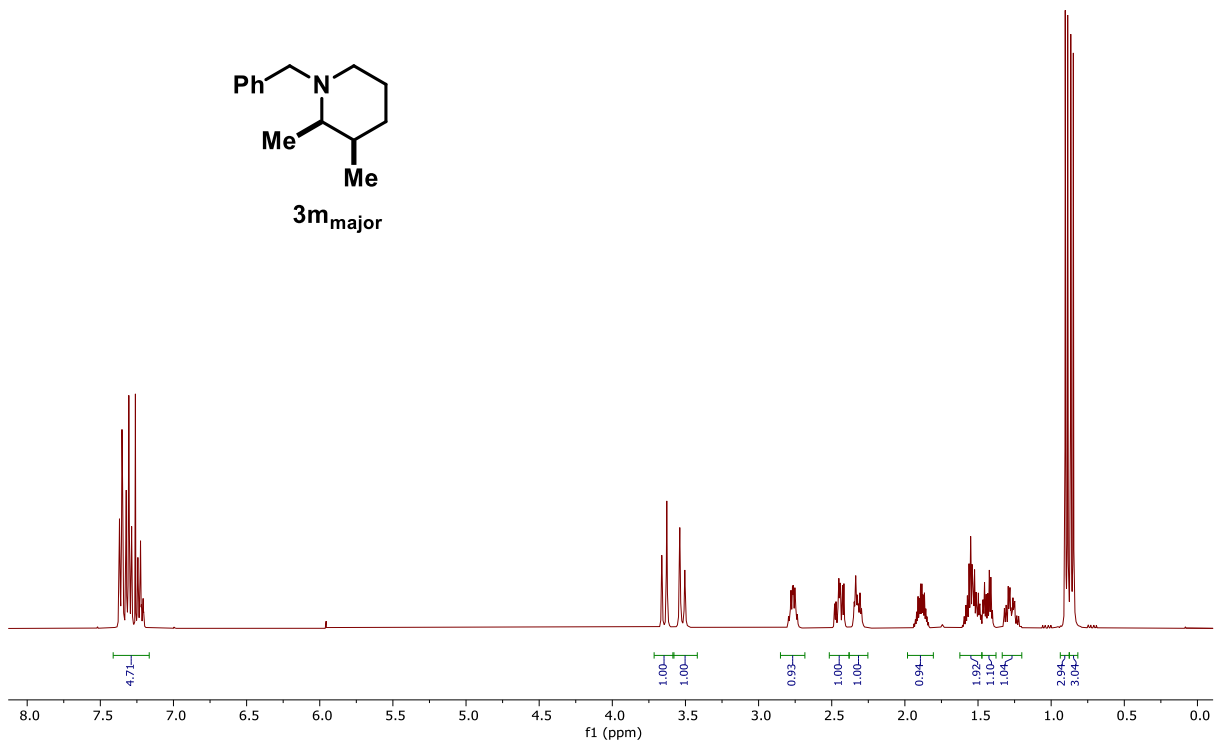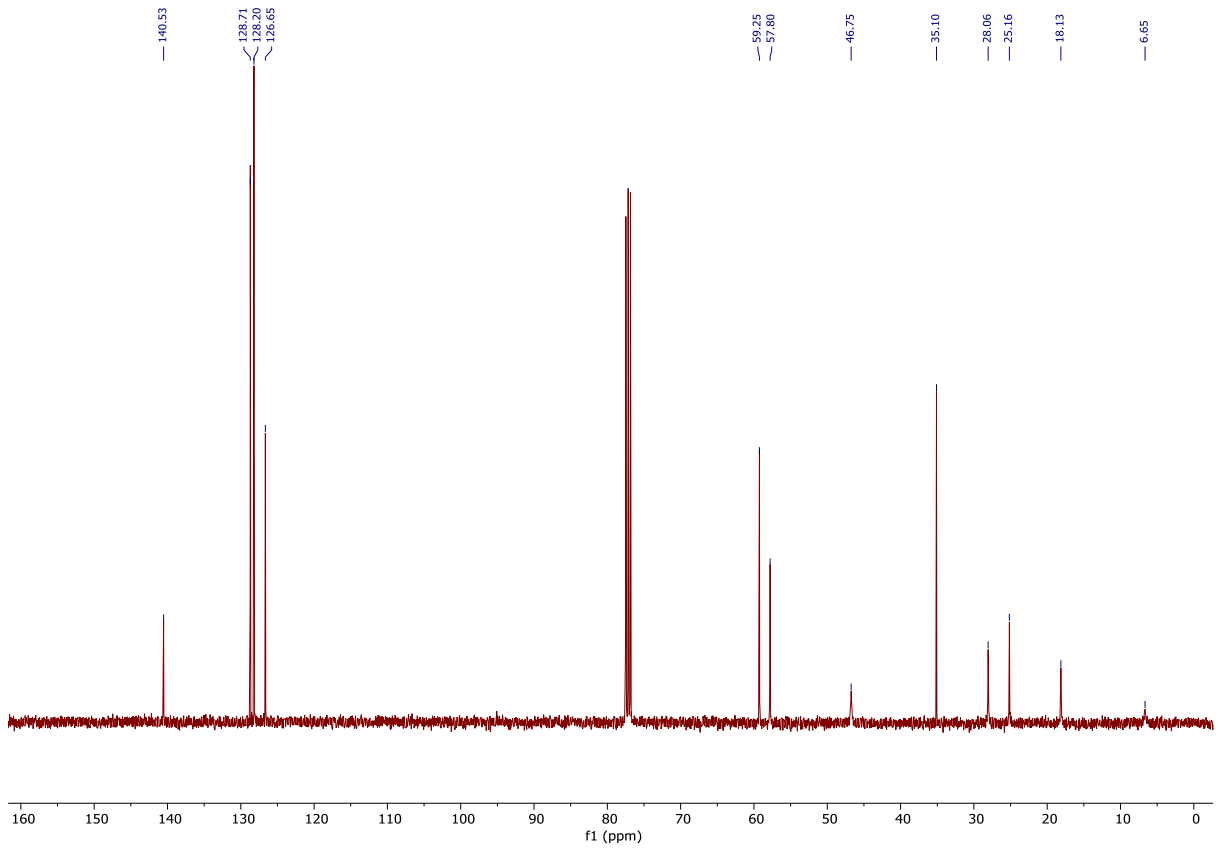

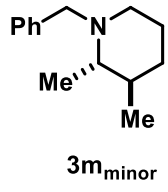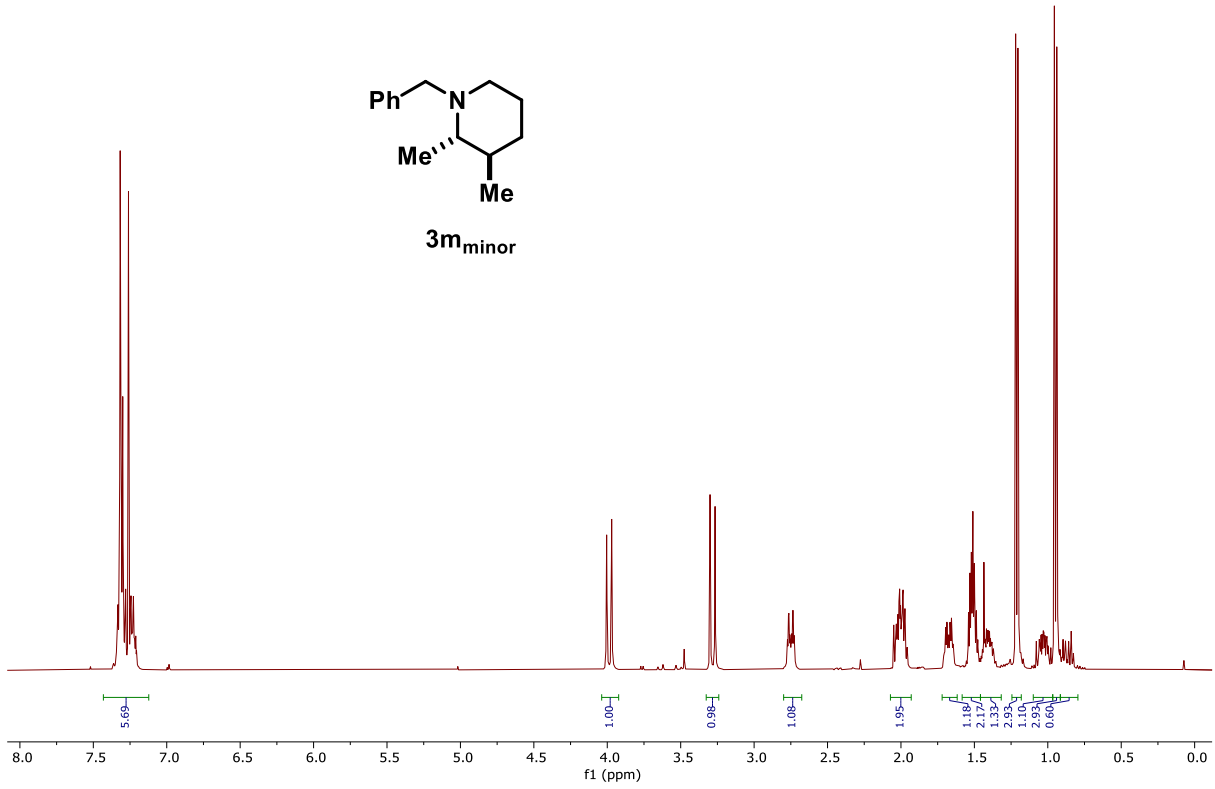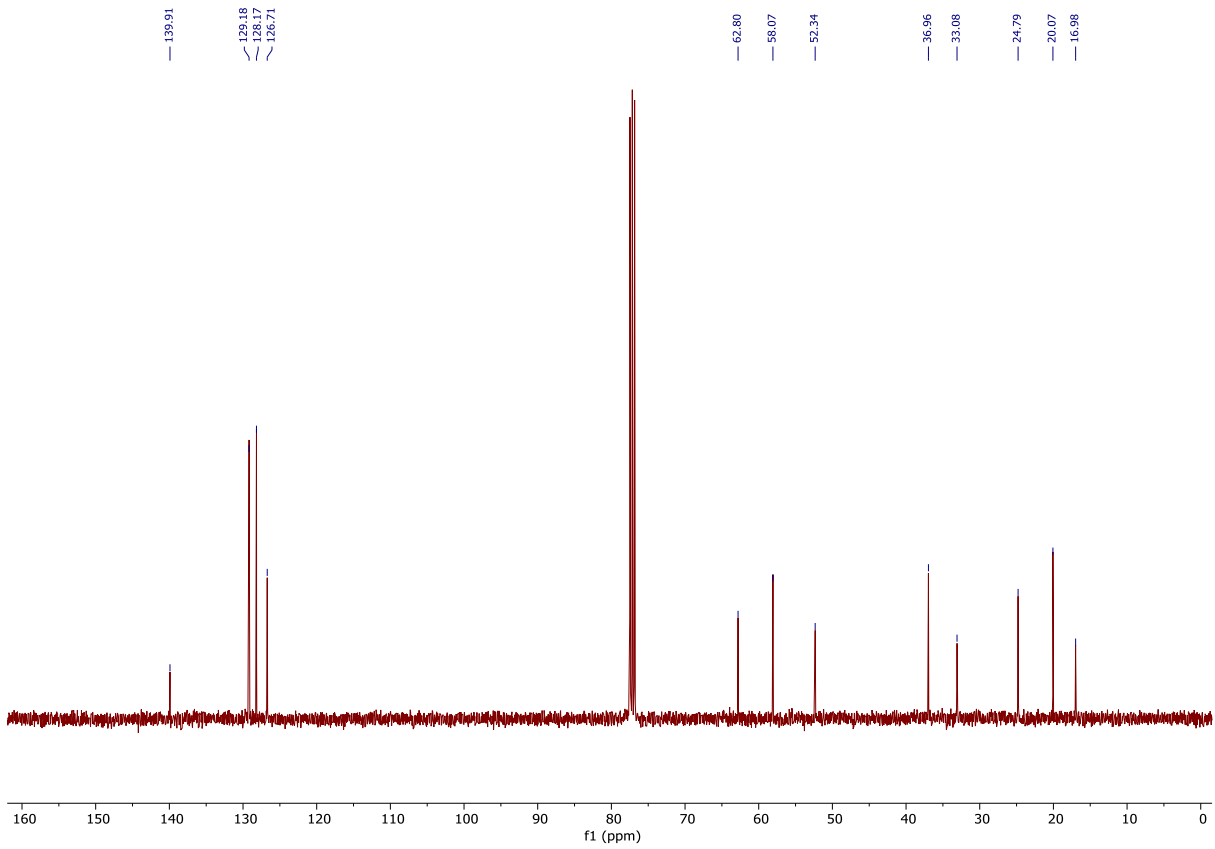

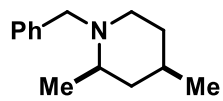

3n (82:18 d.r.)

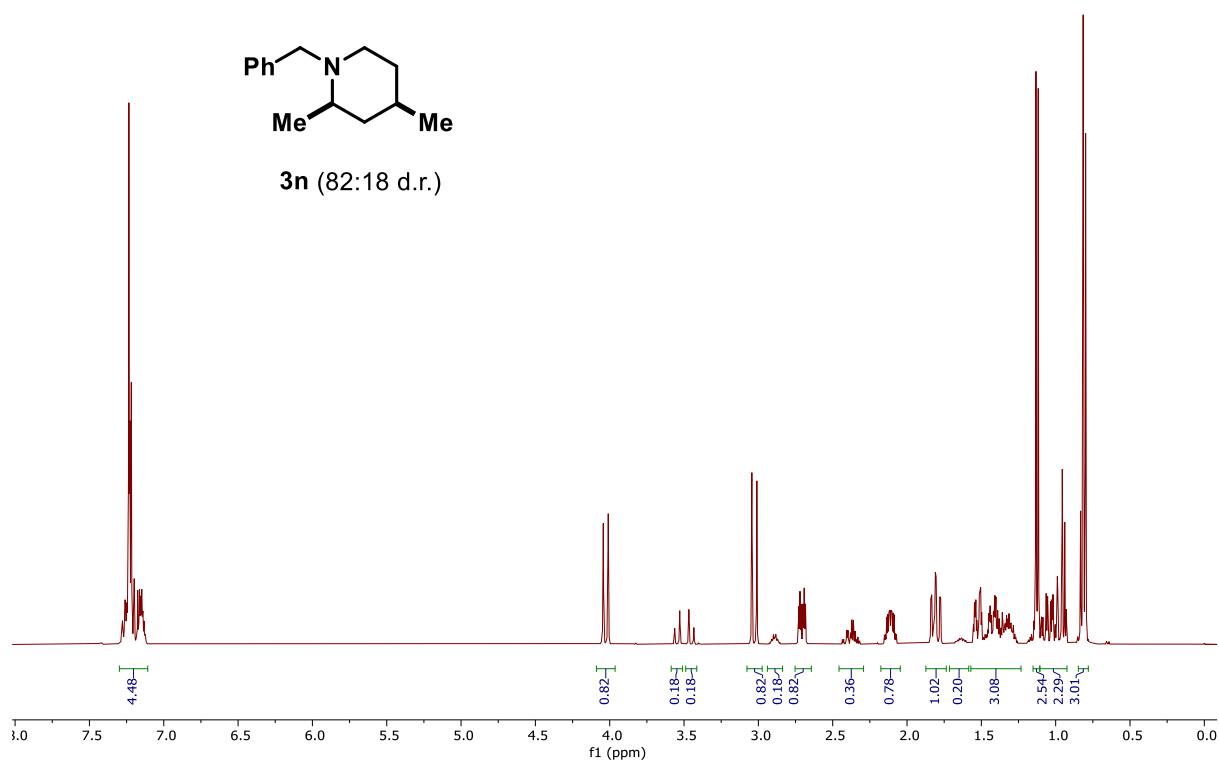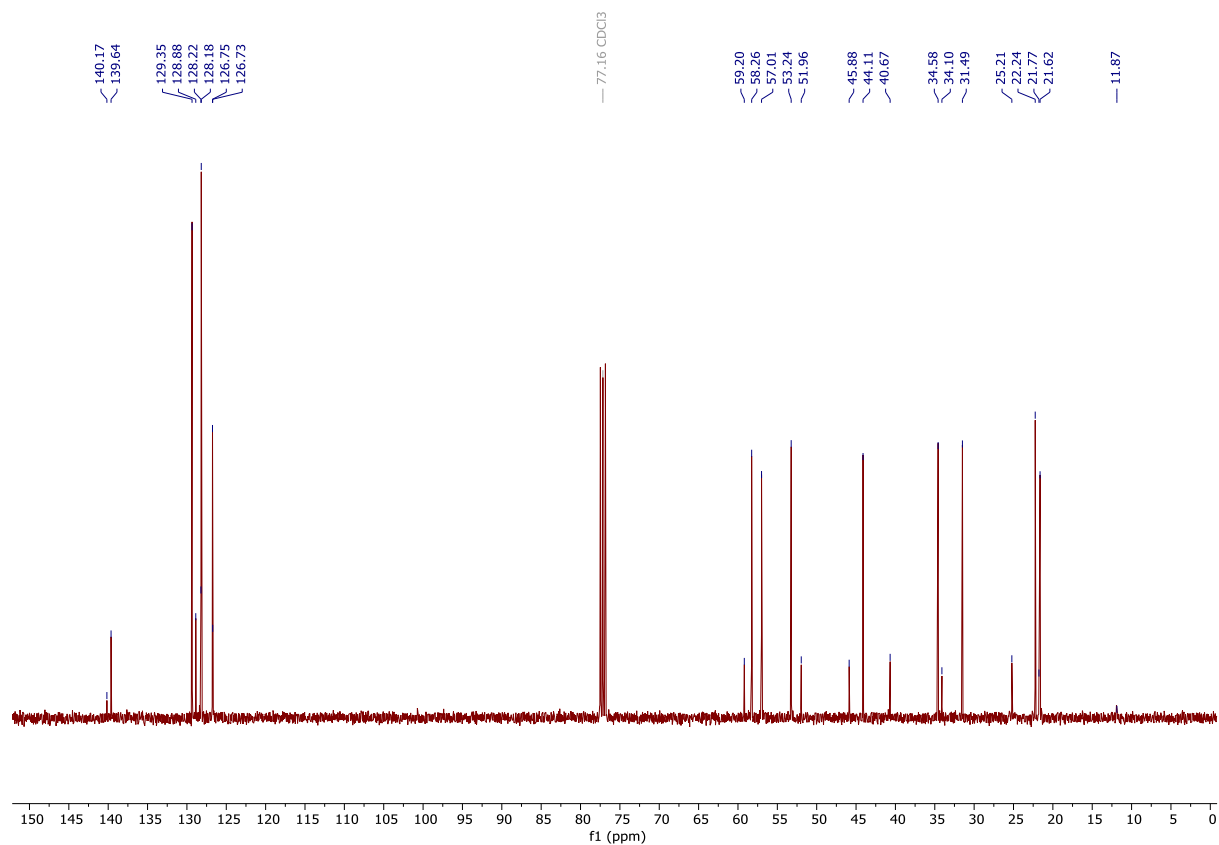



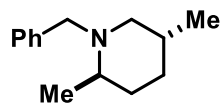

**3o** (72:28 d.r.)

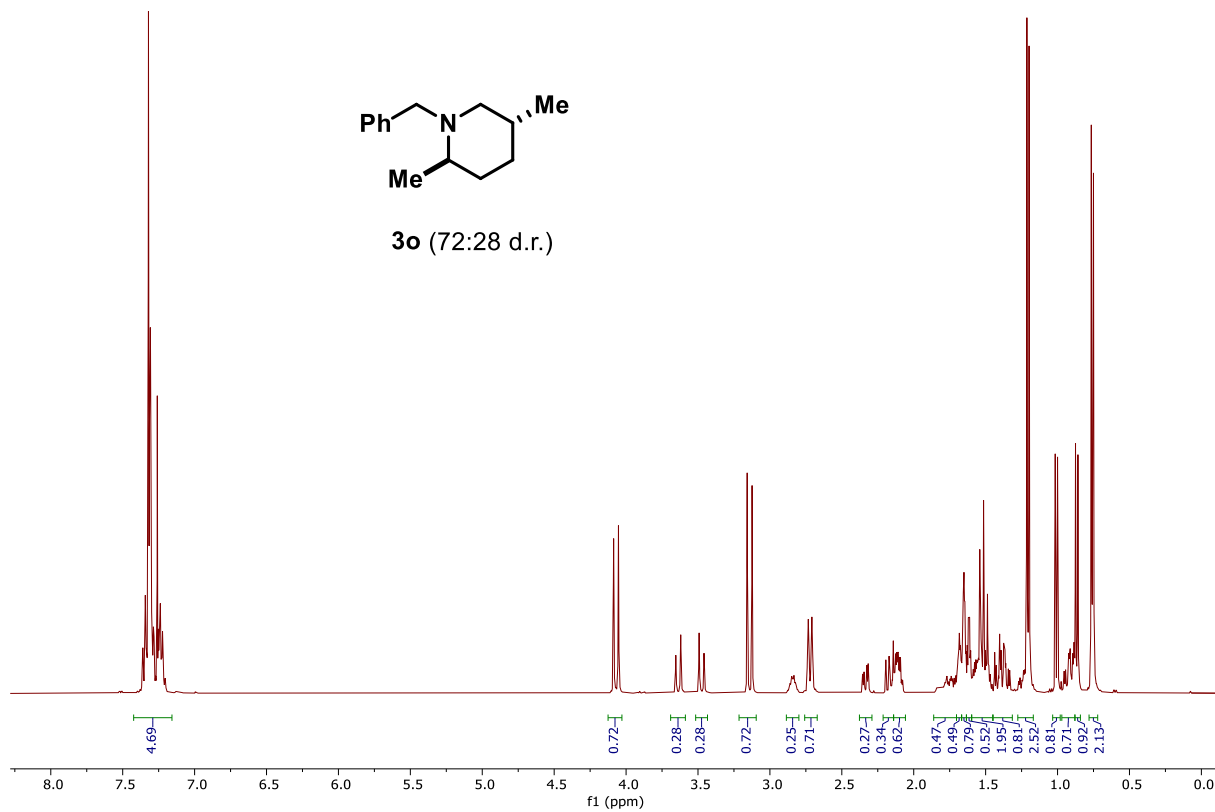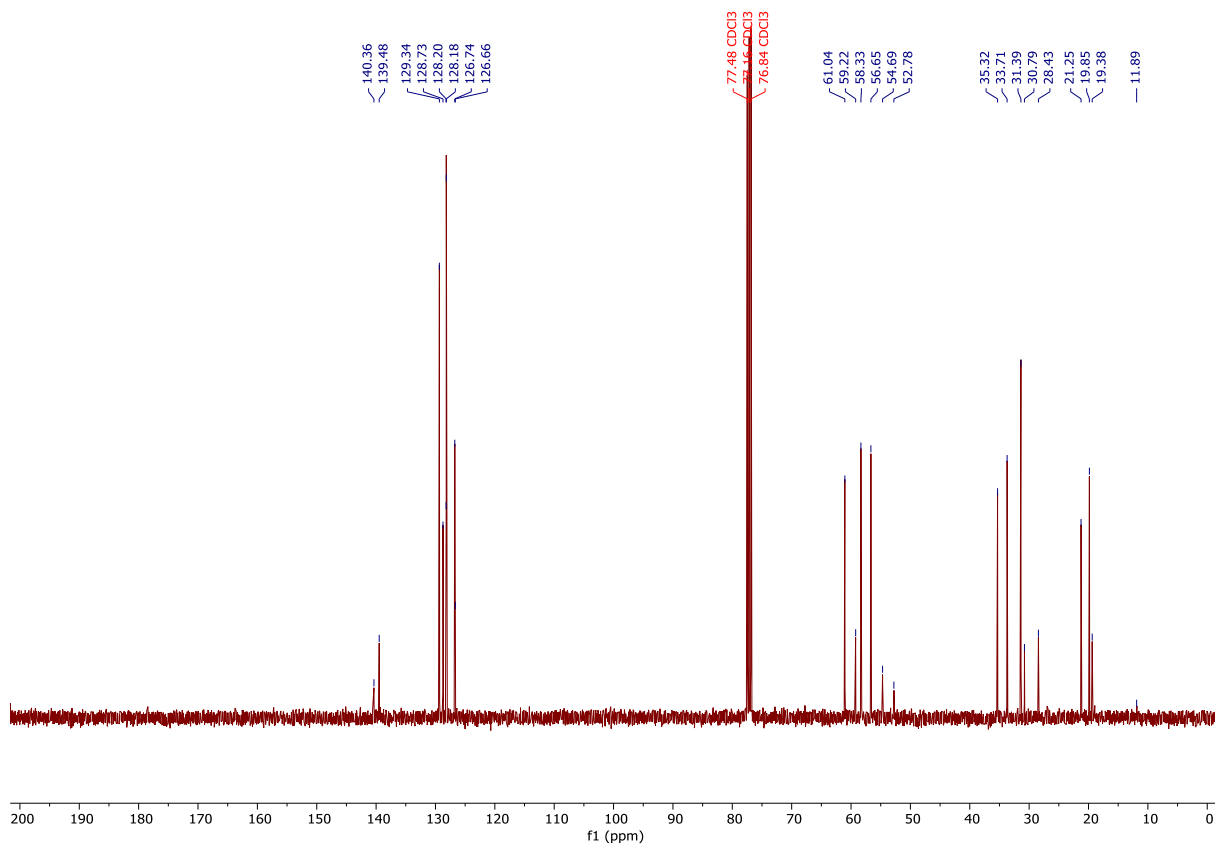

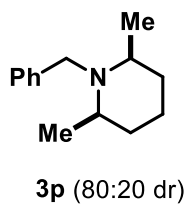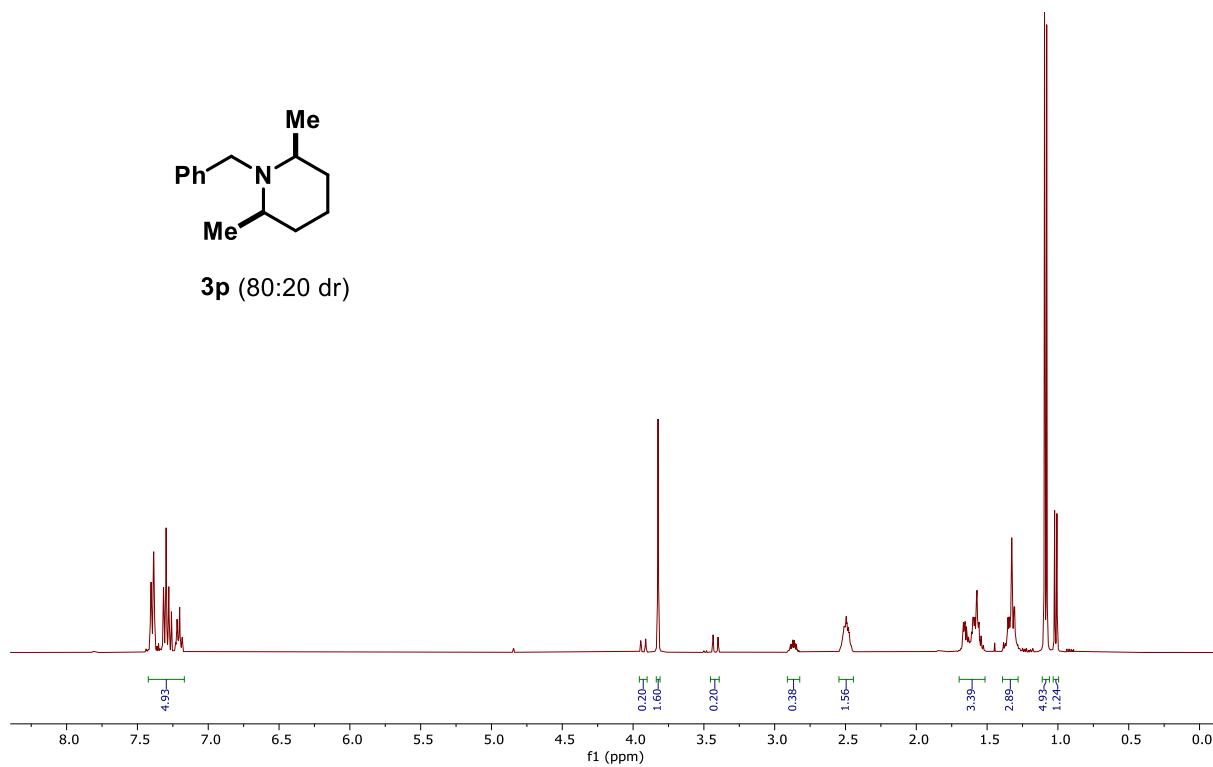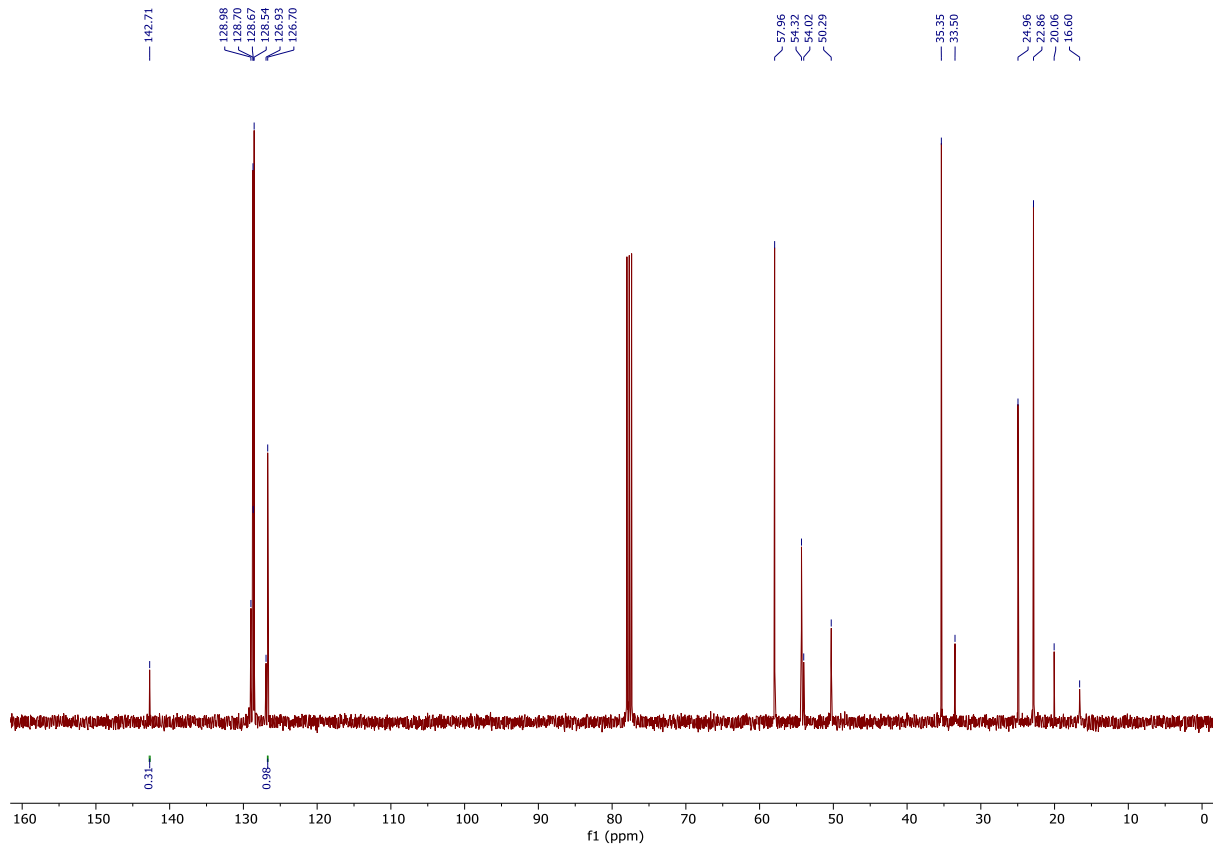

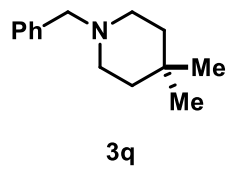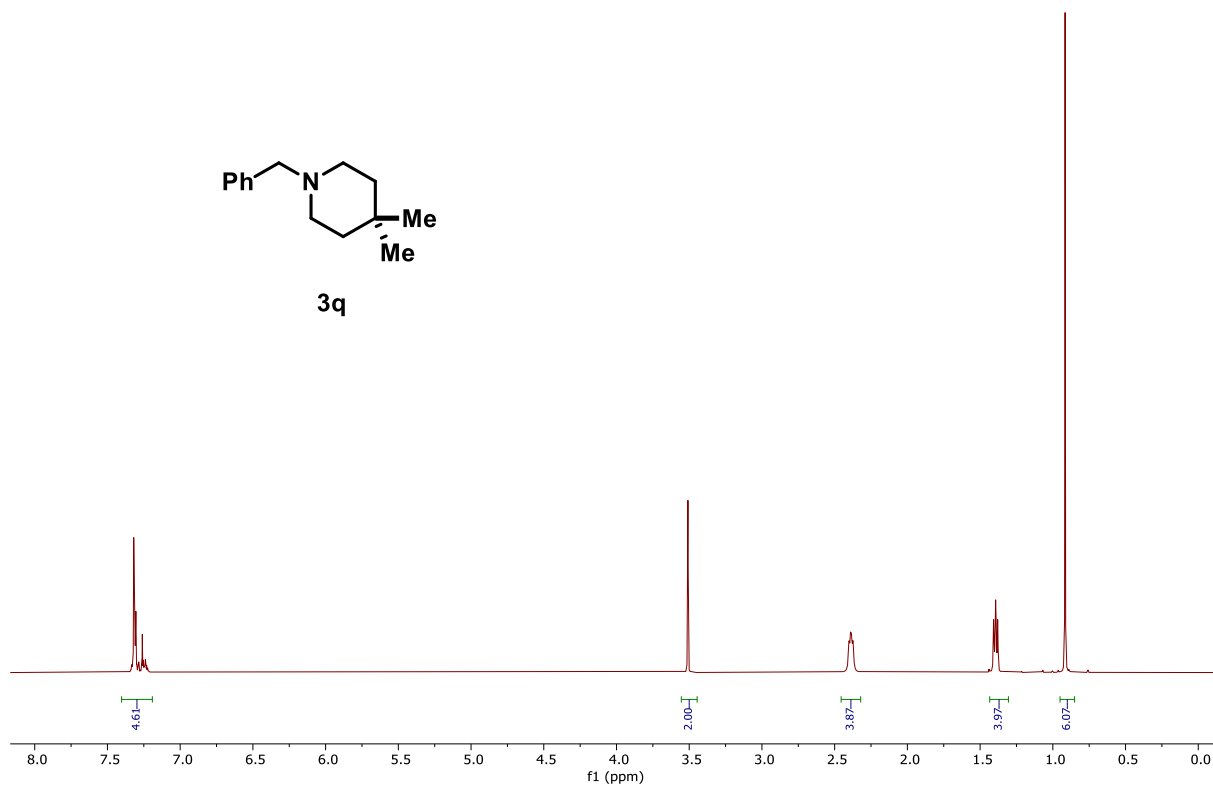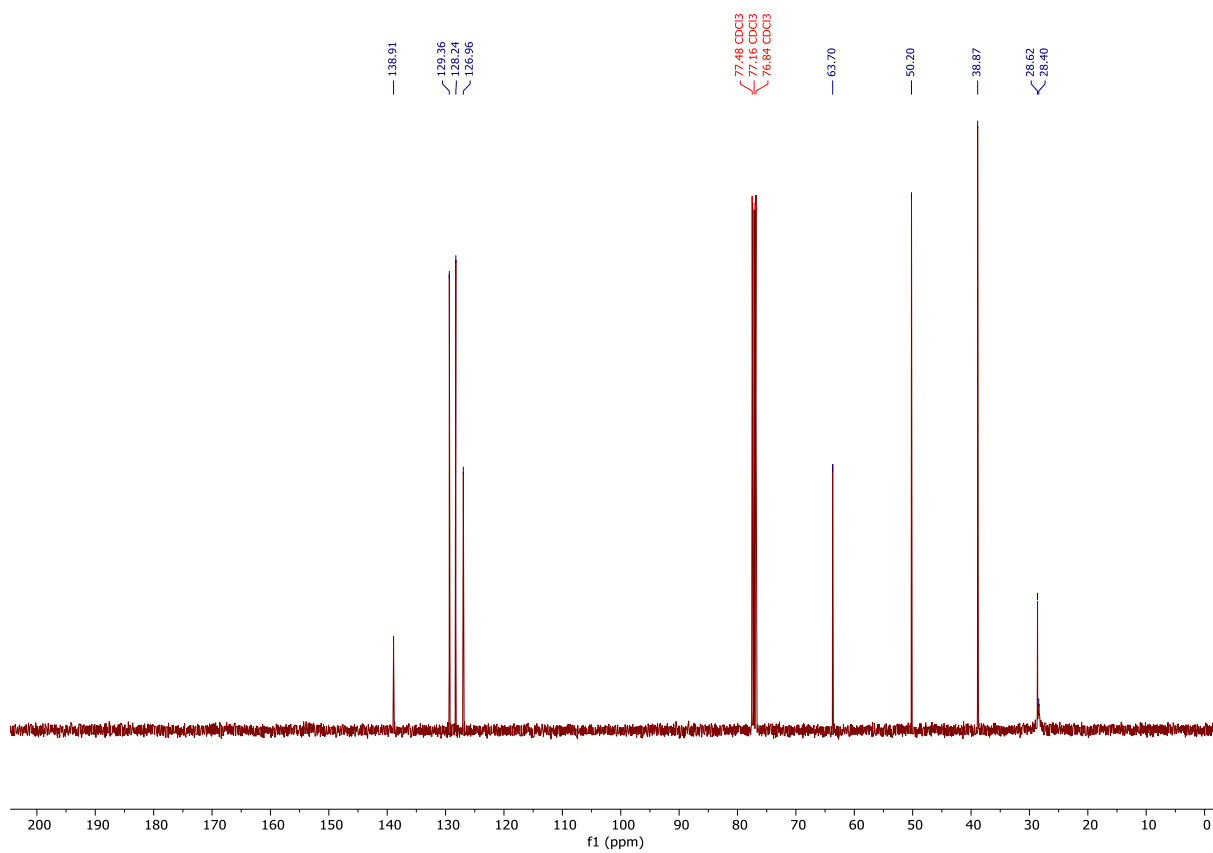

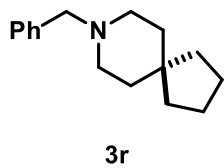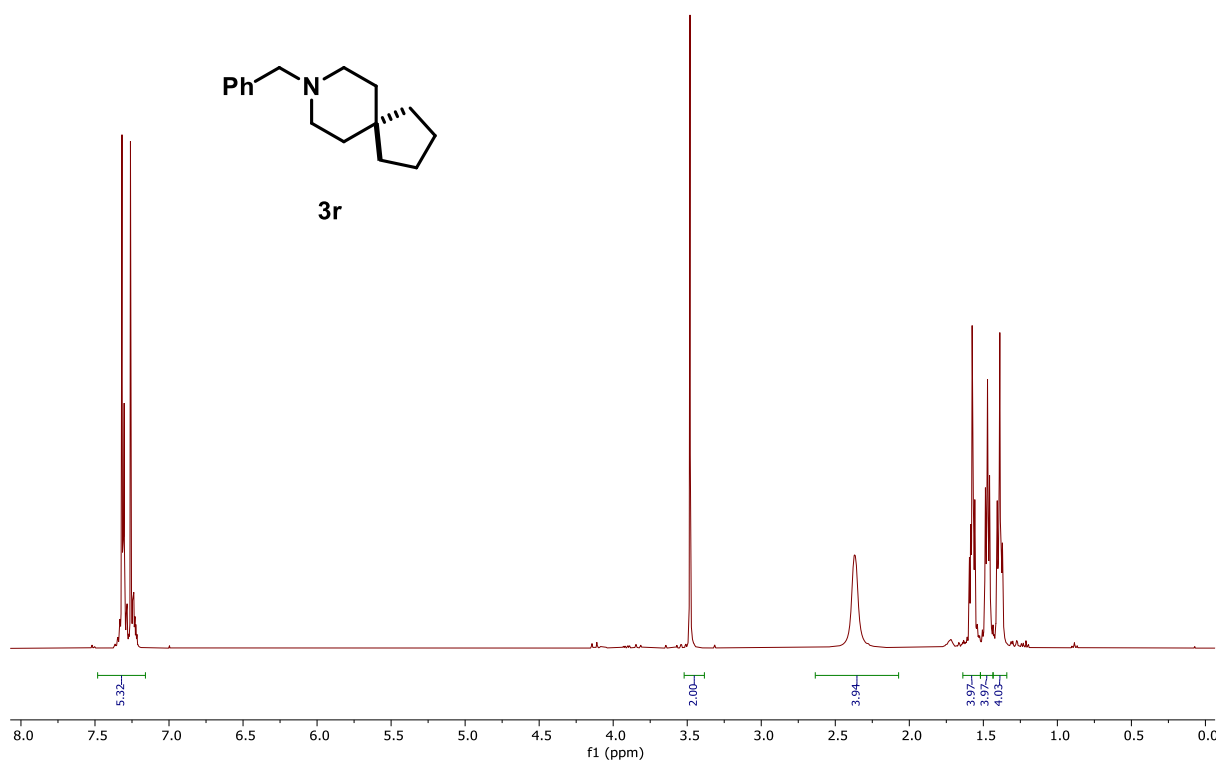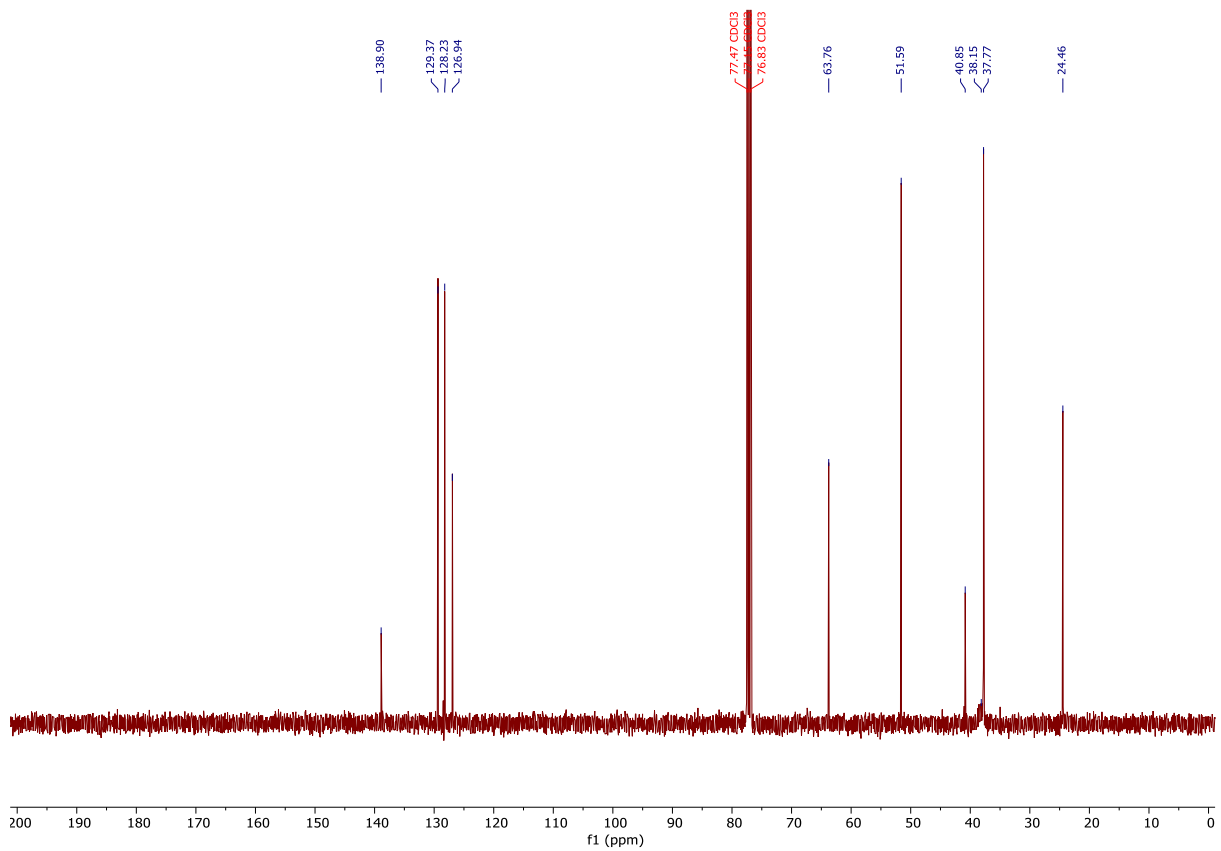

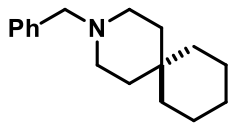

3s

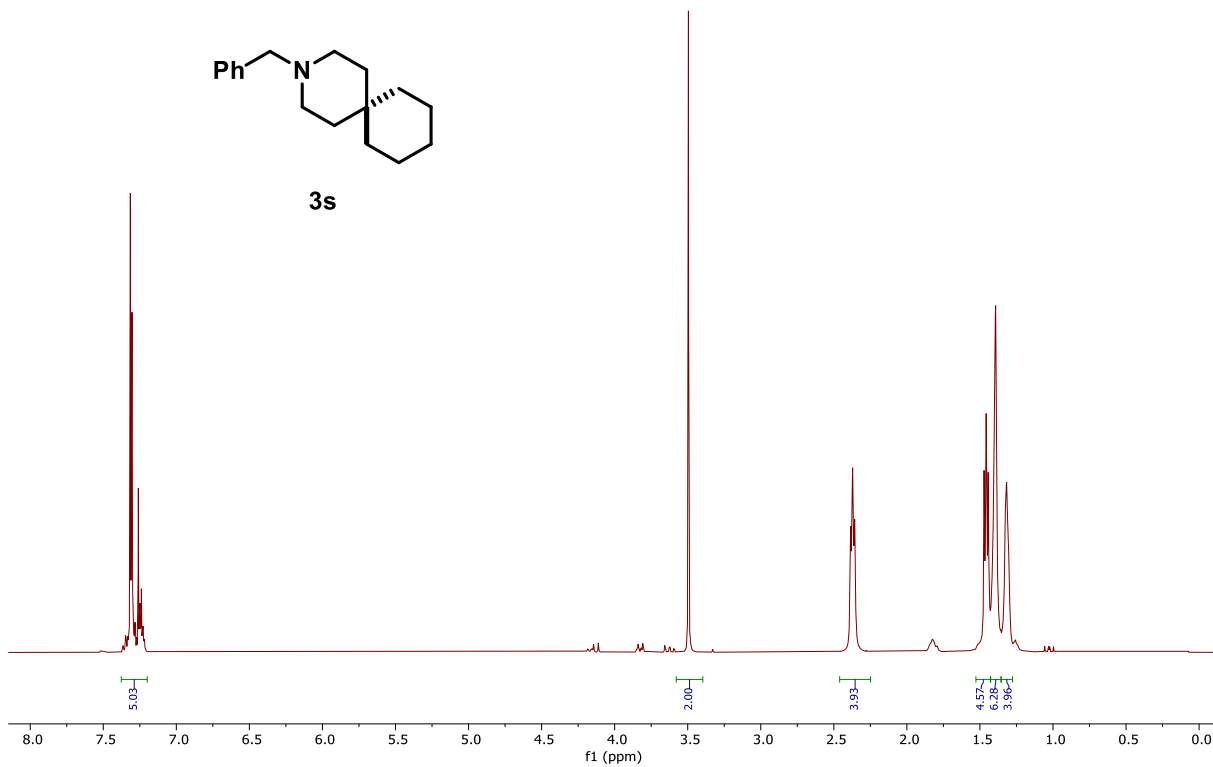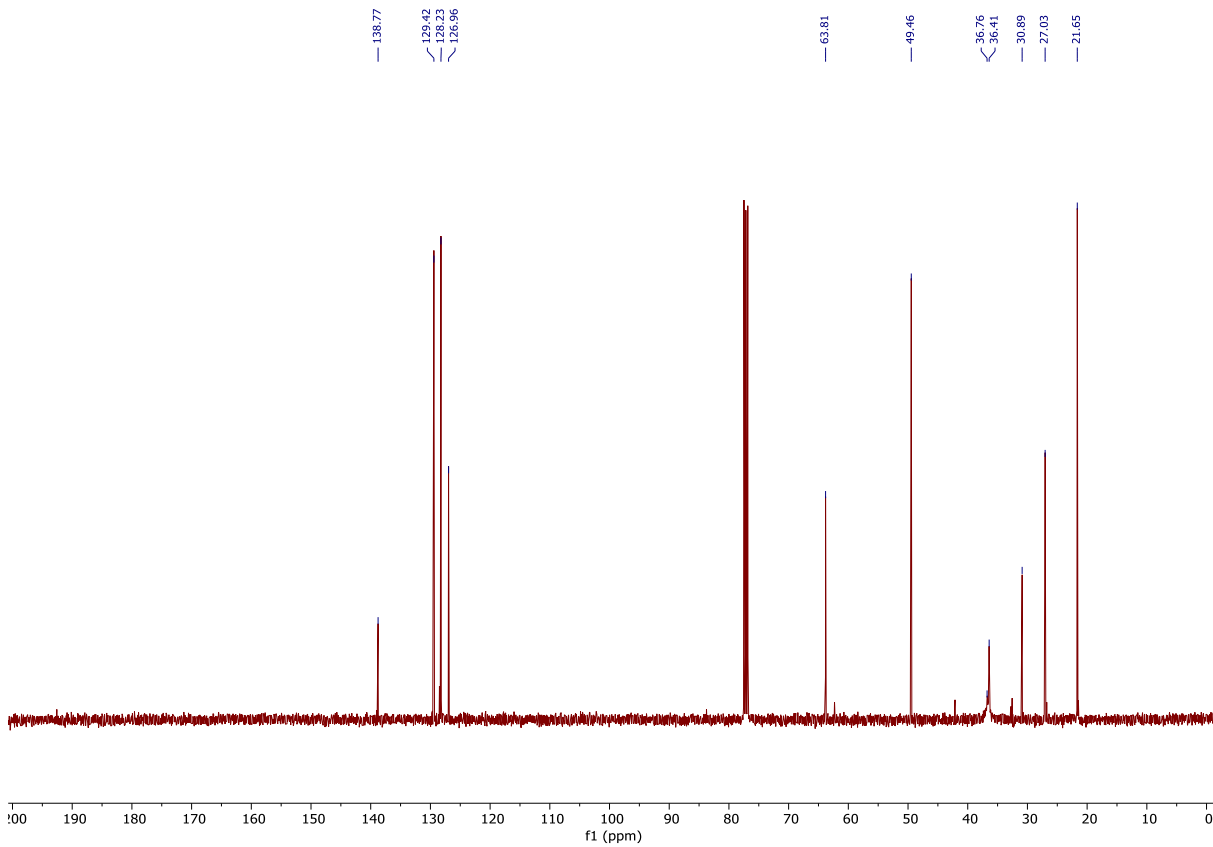

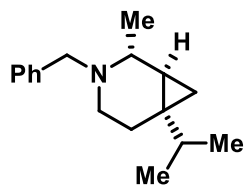

3t (62:38 d.r.)

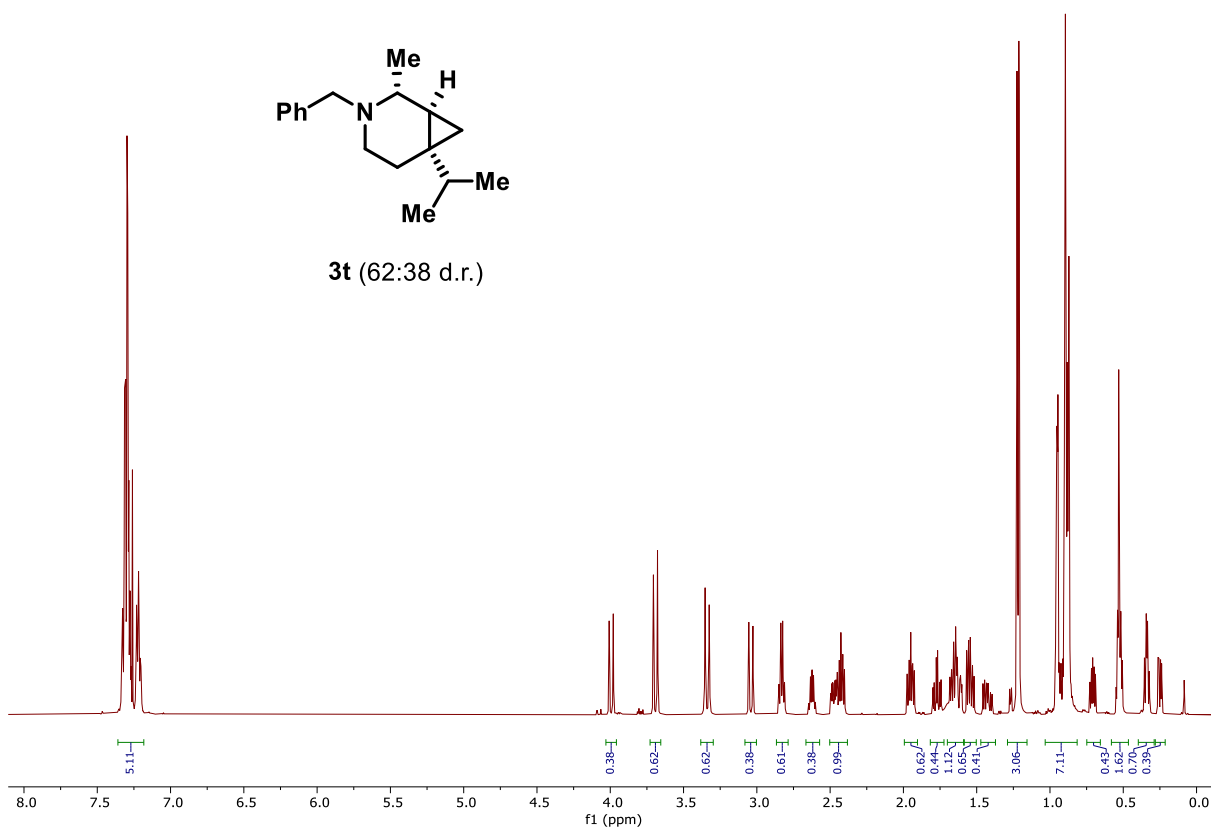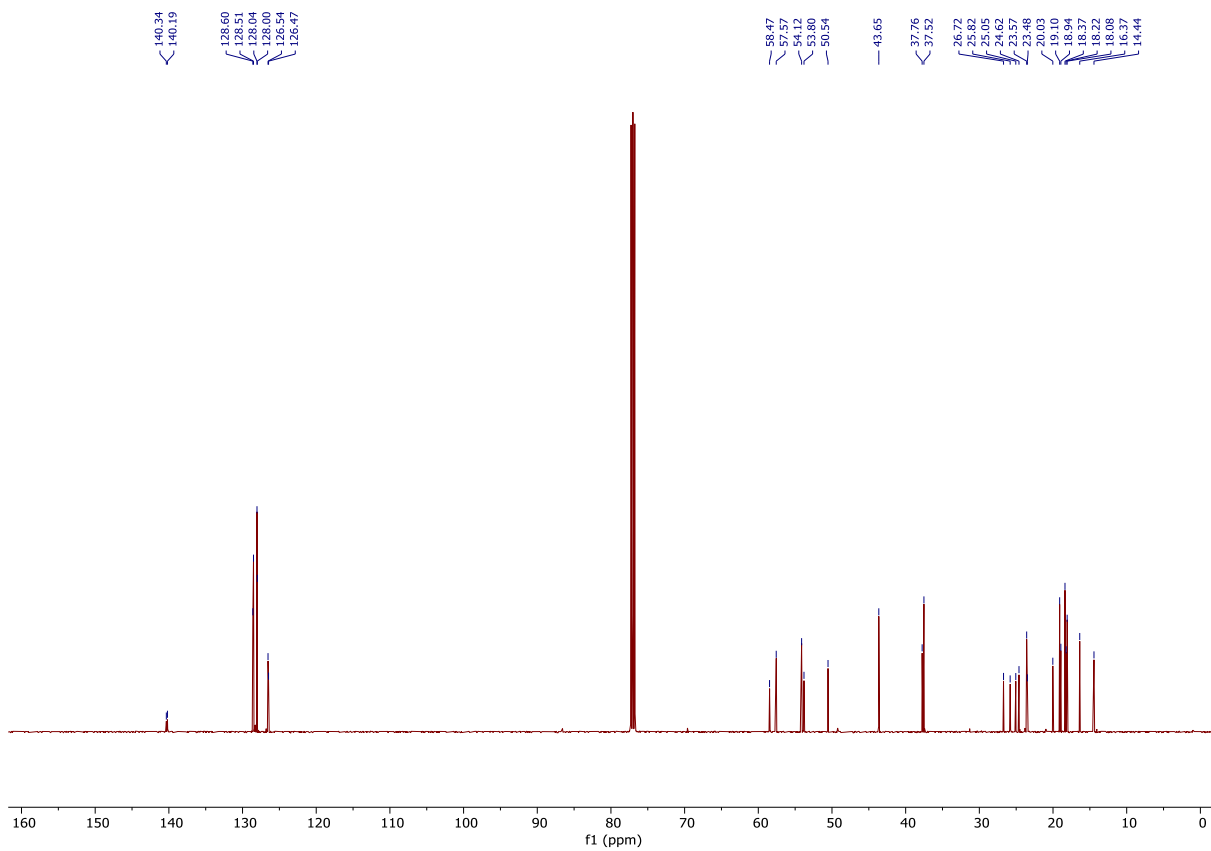

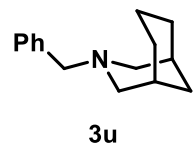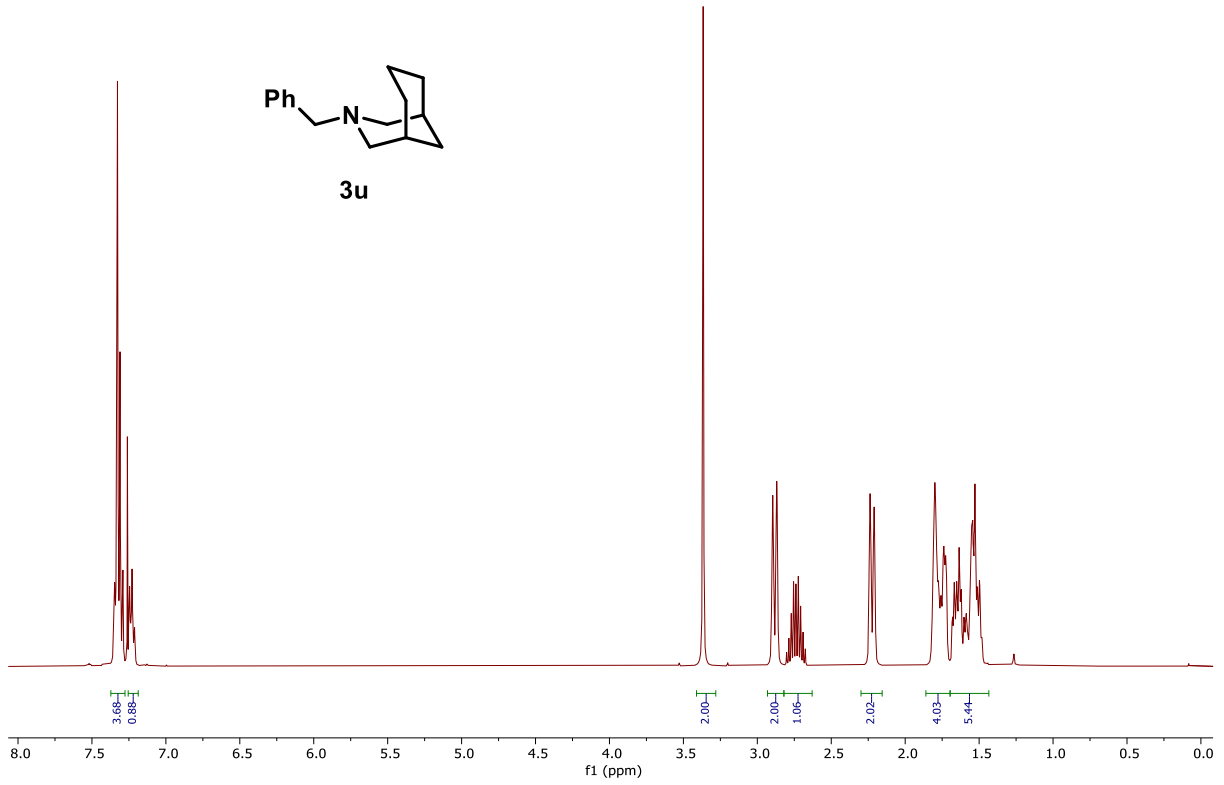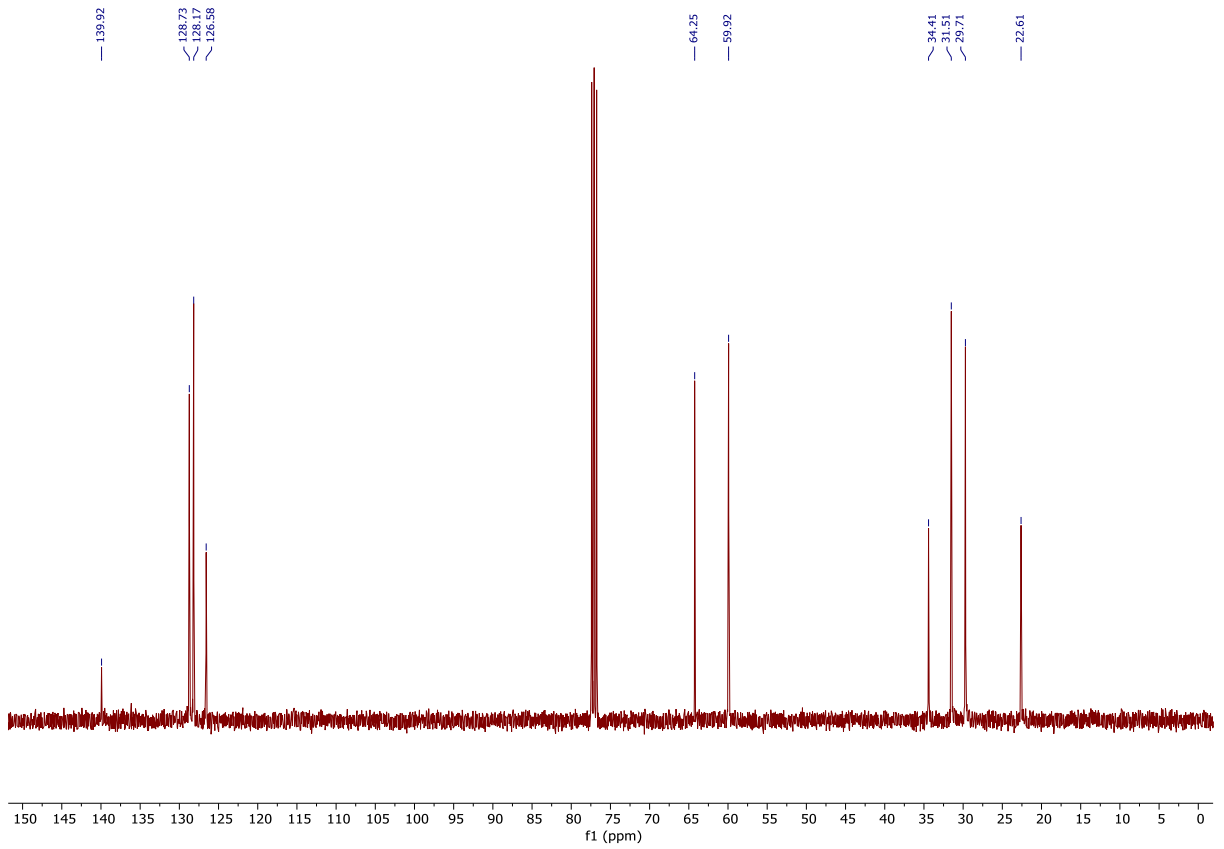

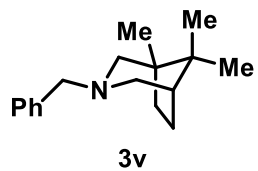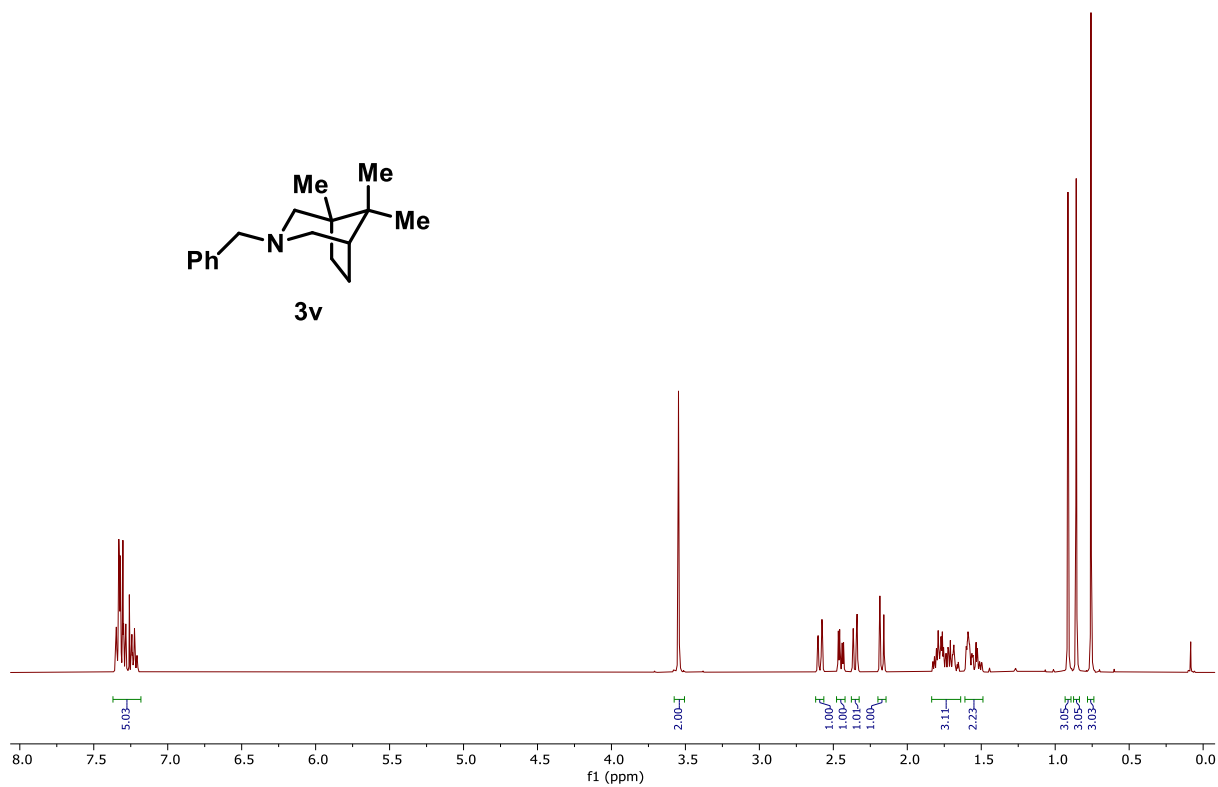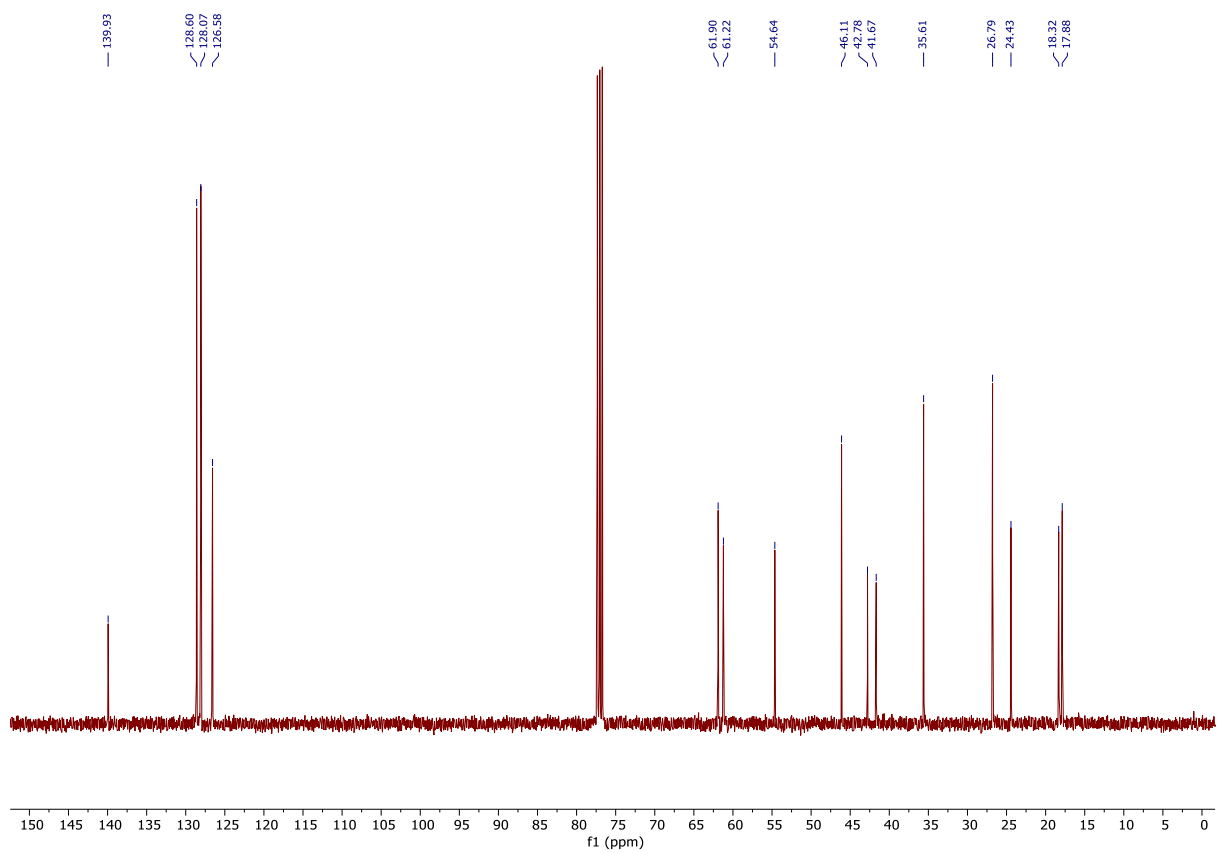



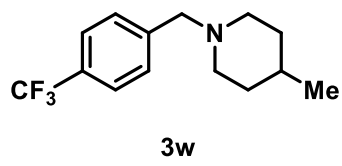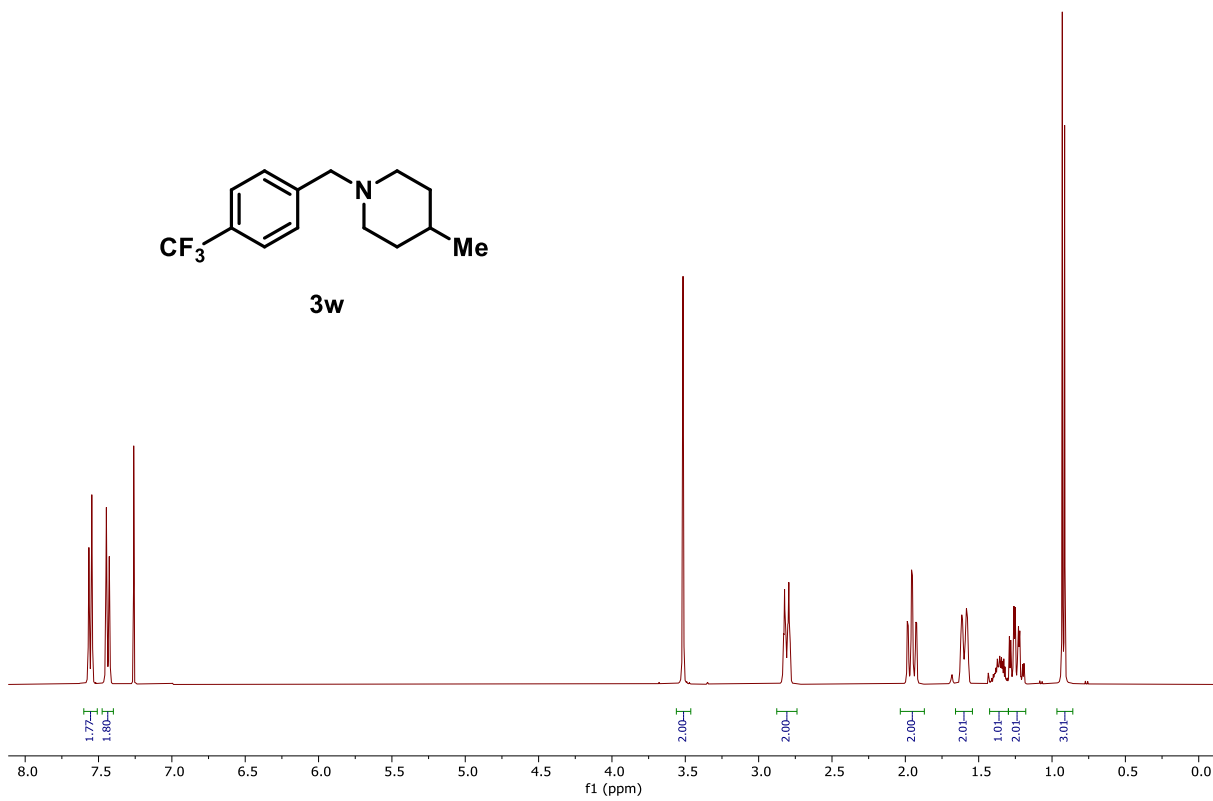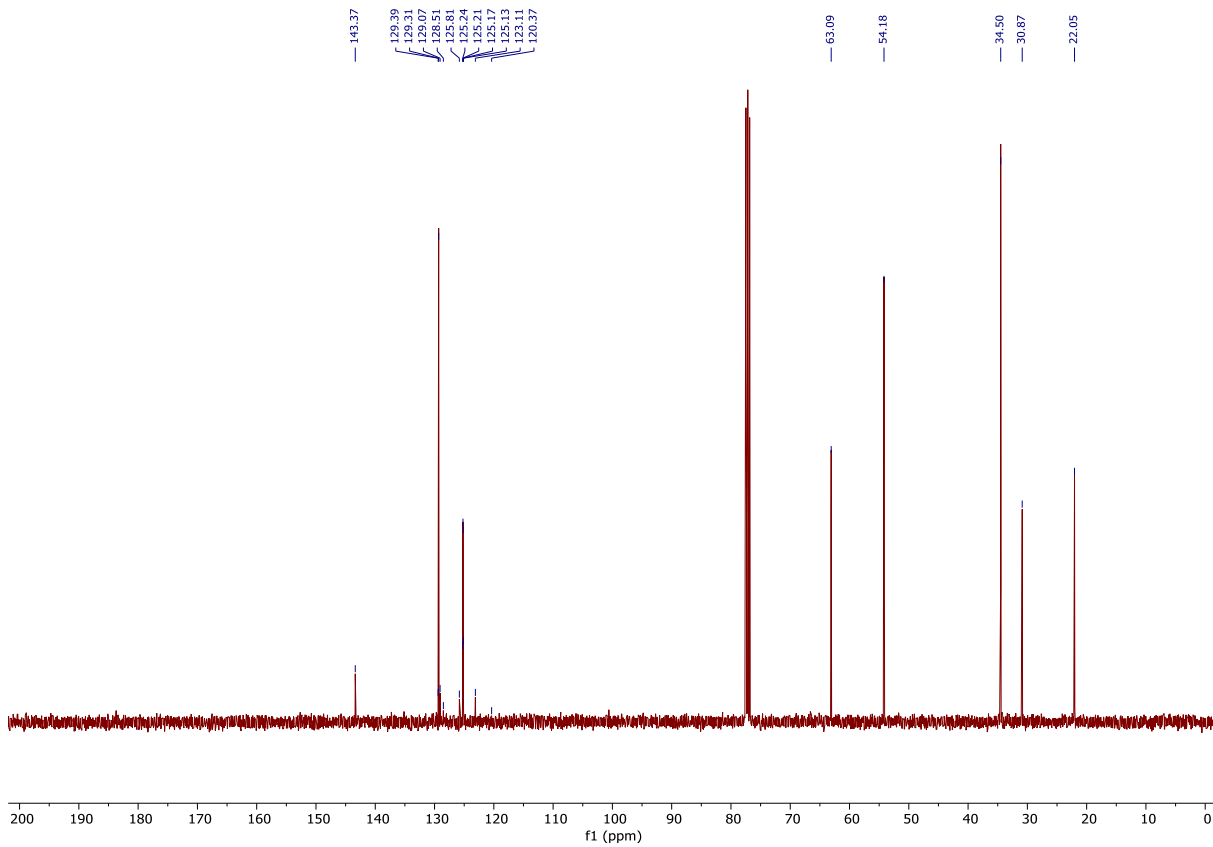

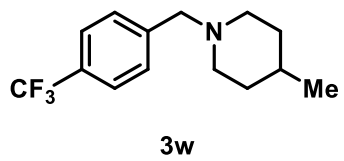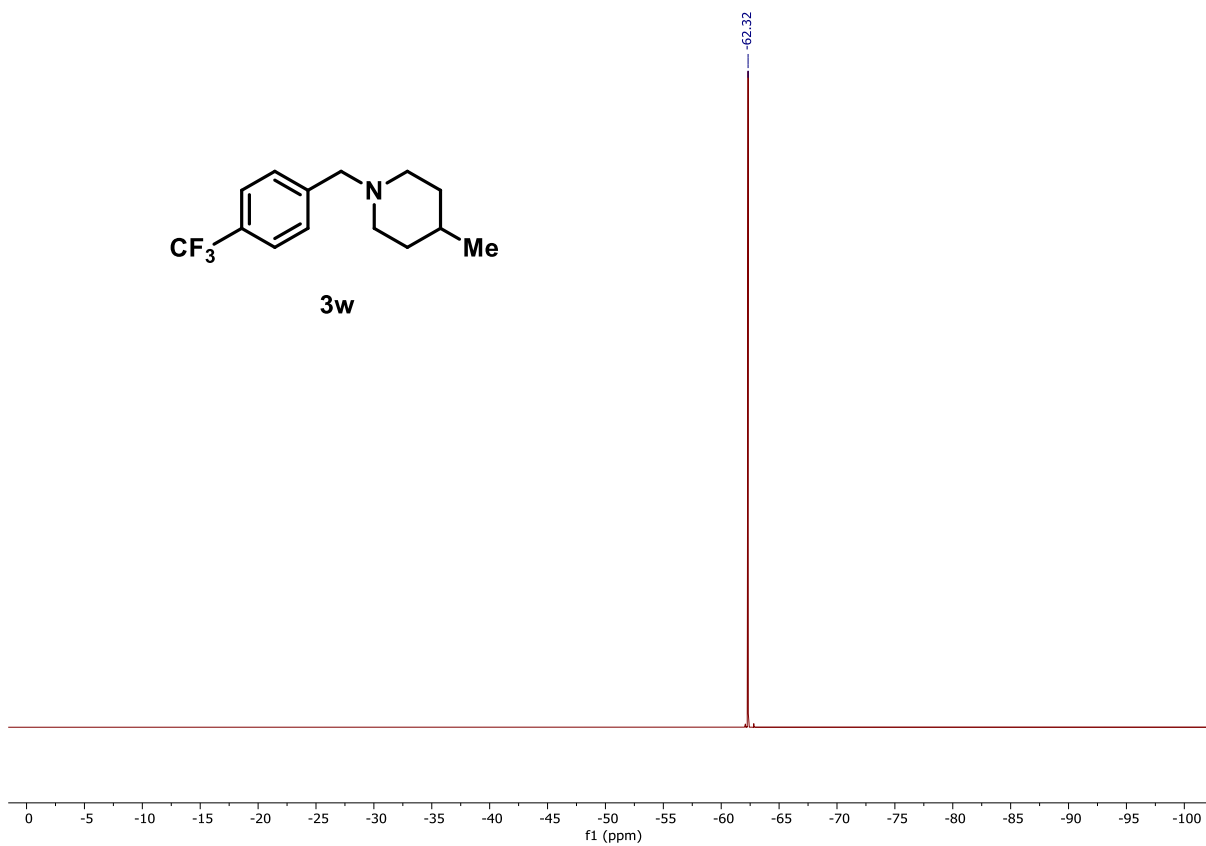

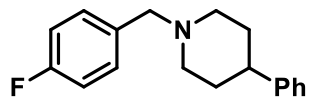

3x

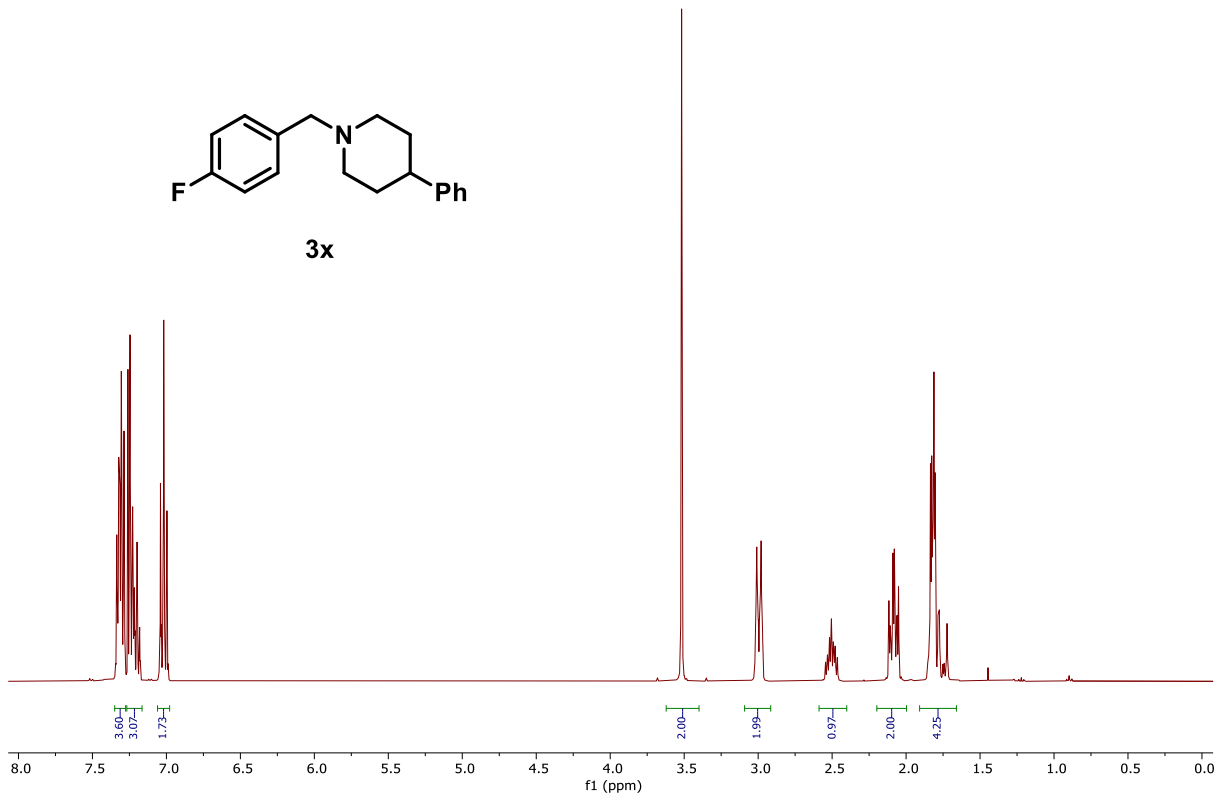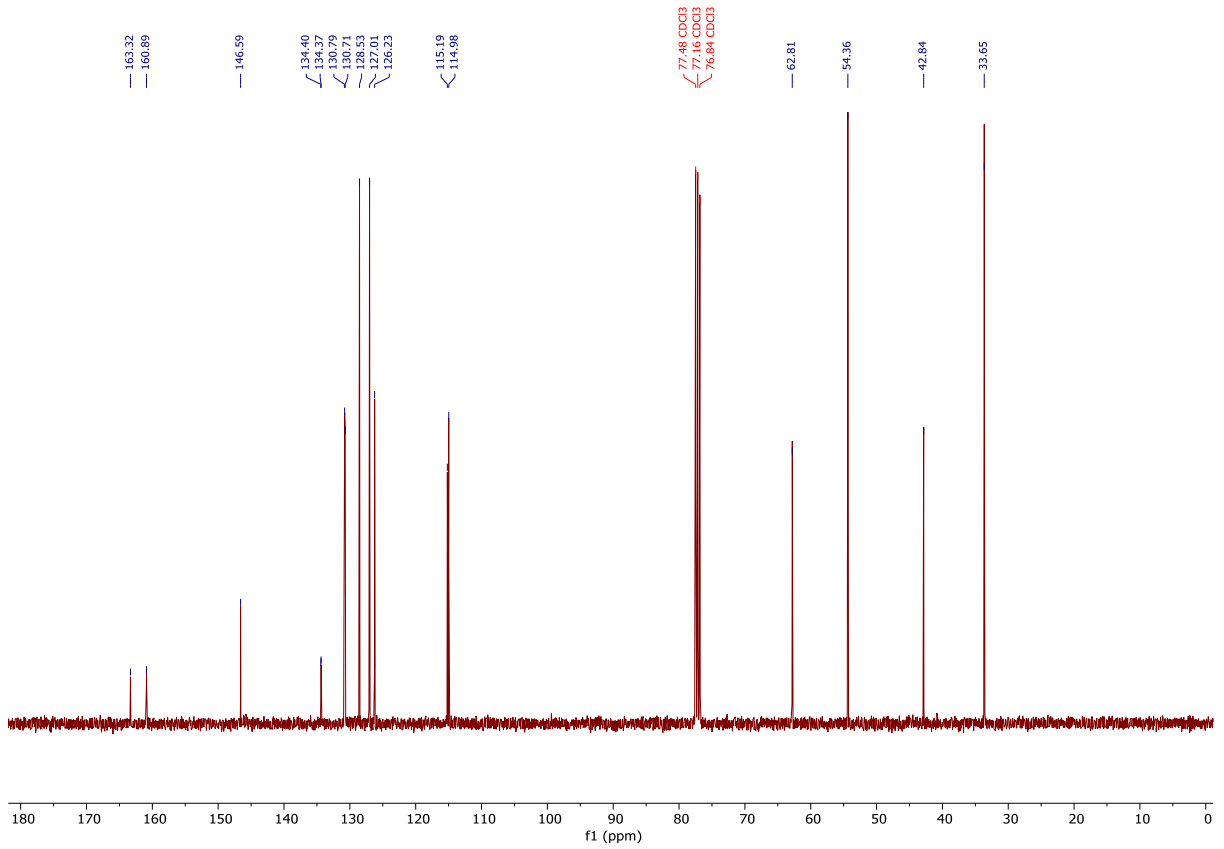

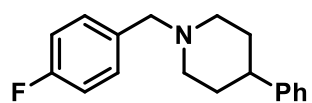

3x

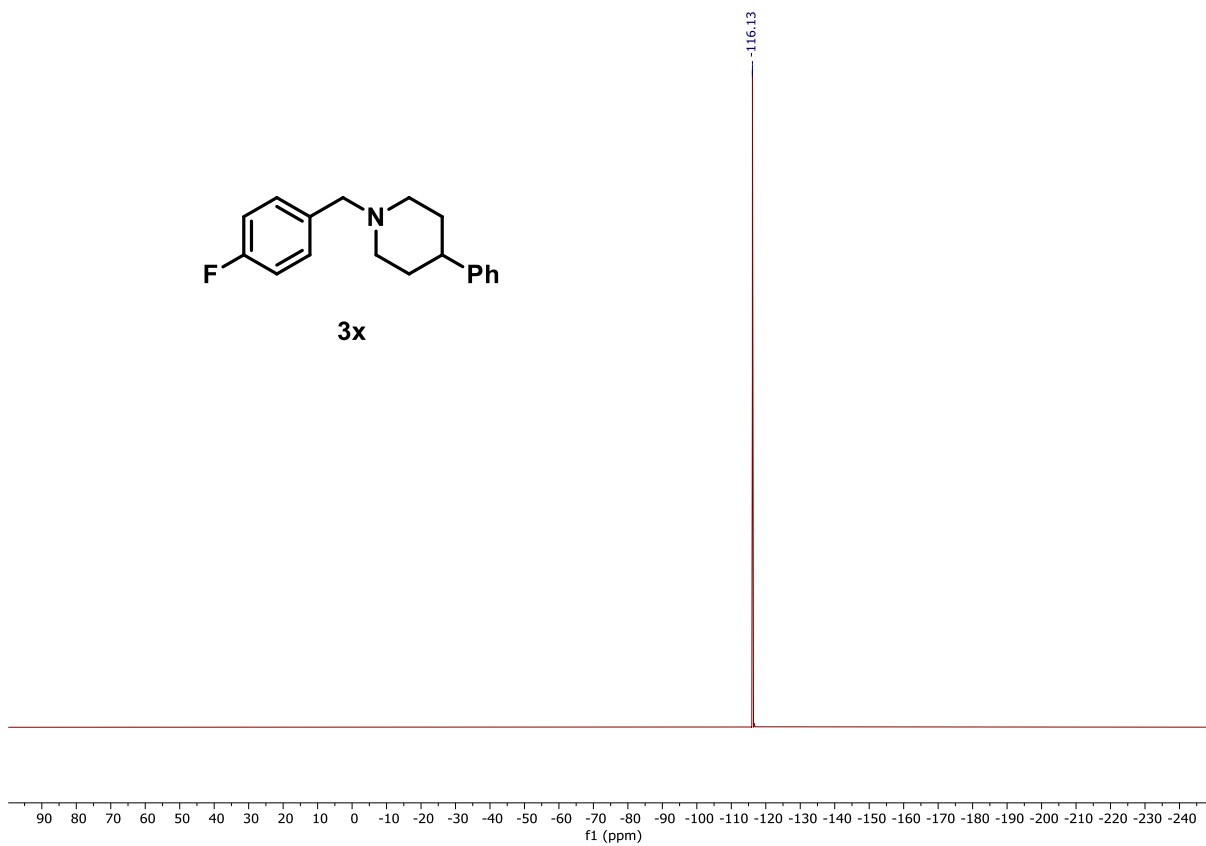

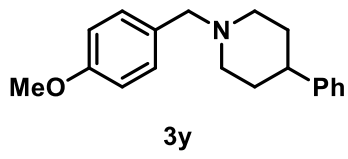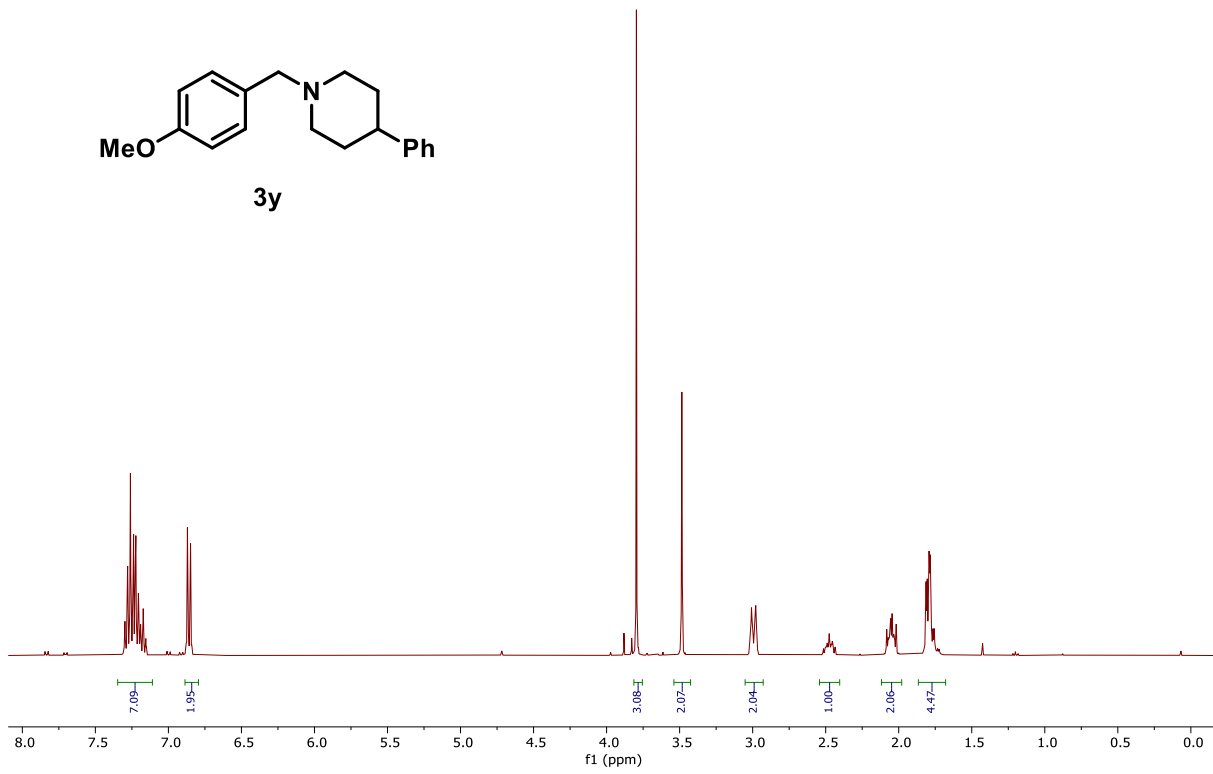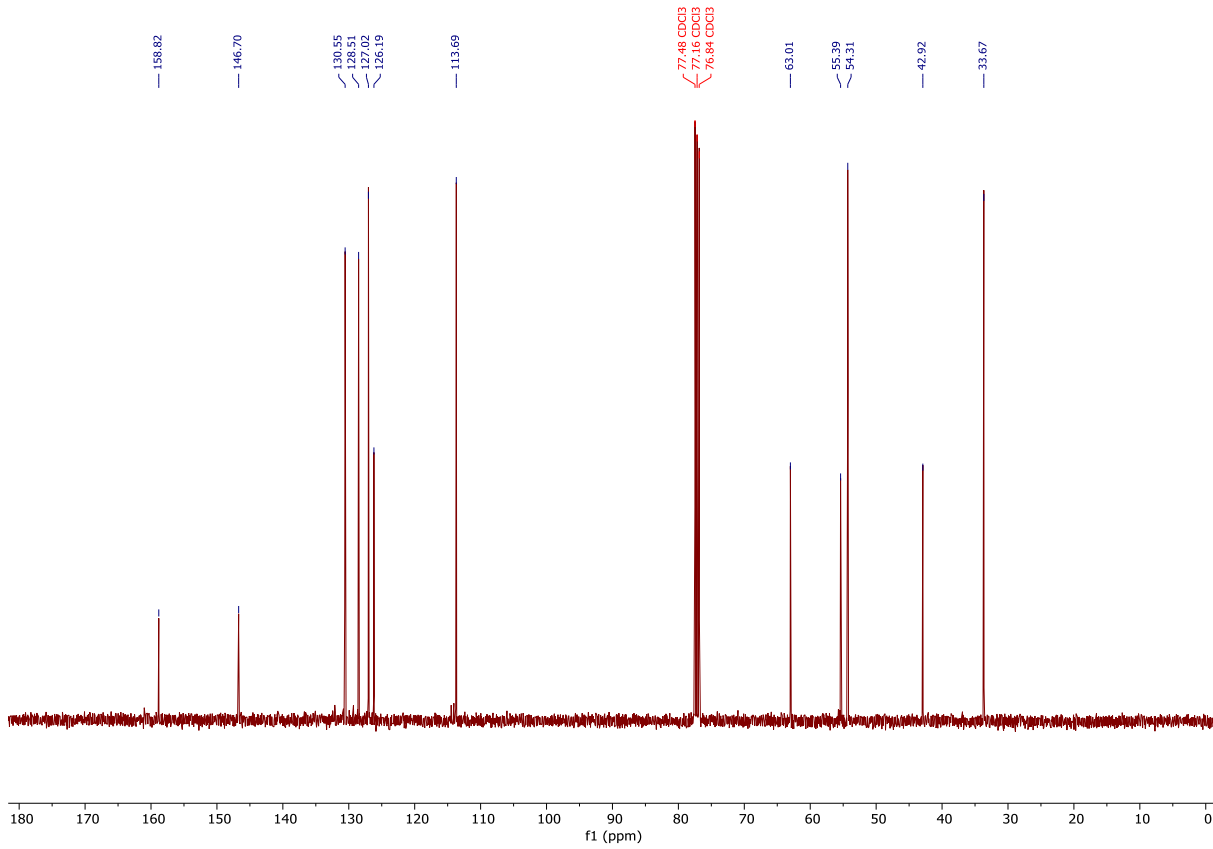

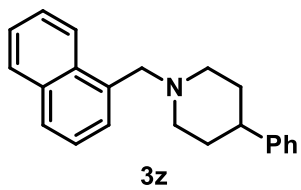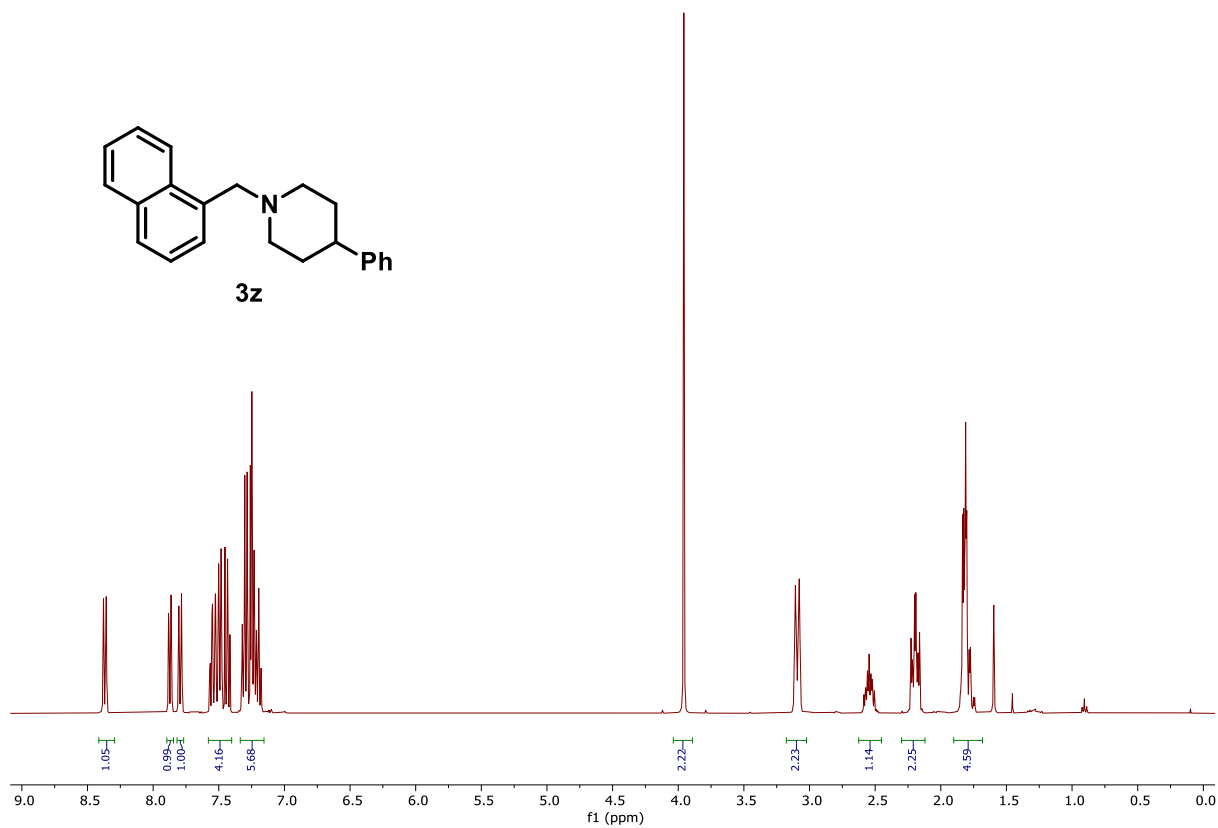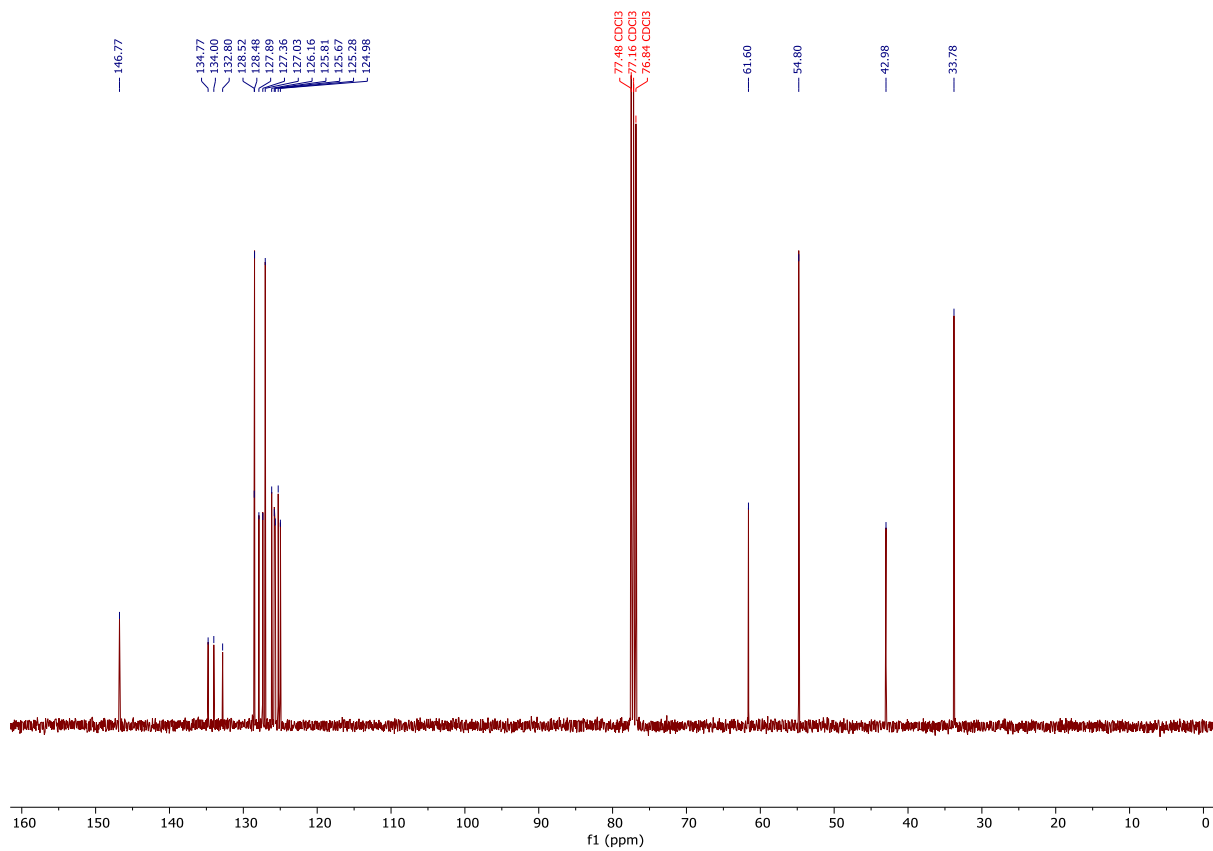

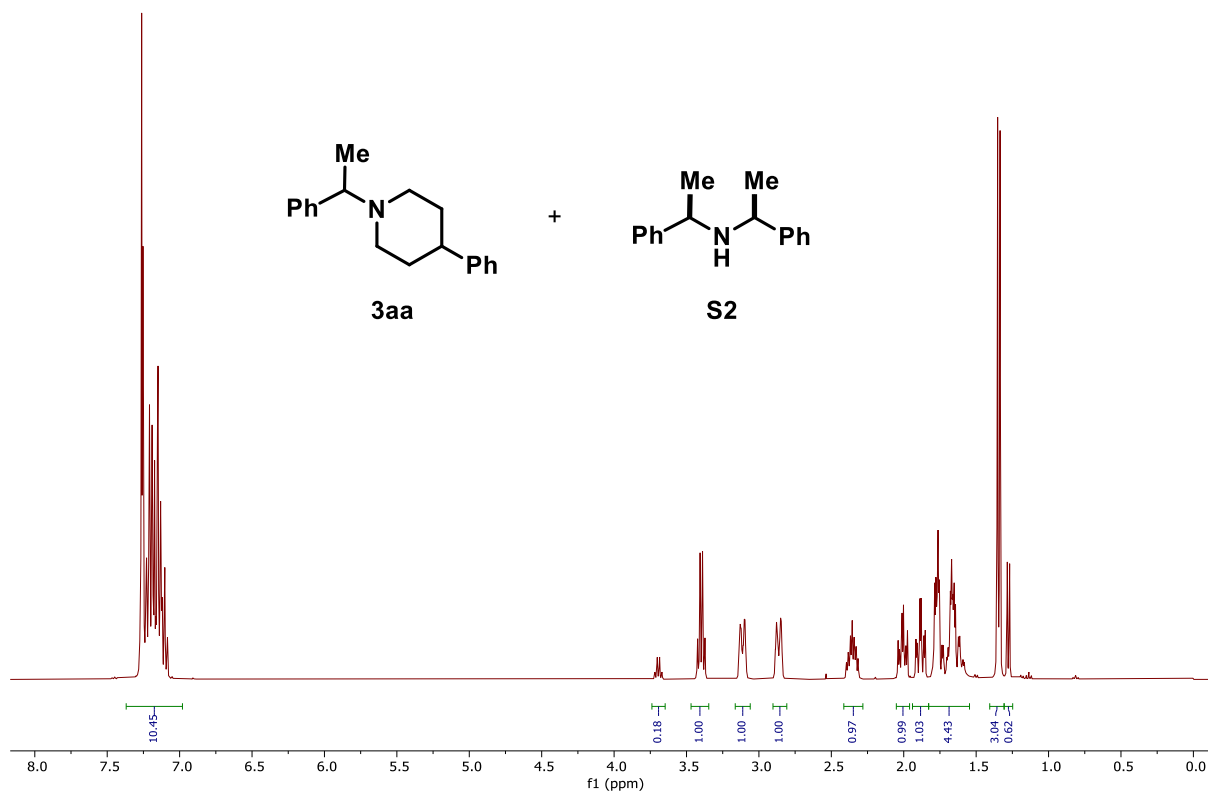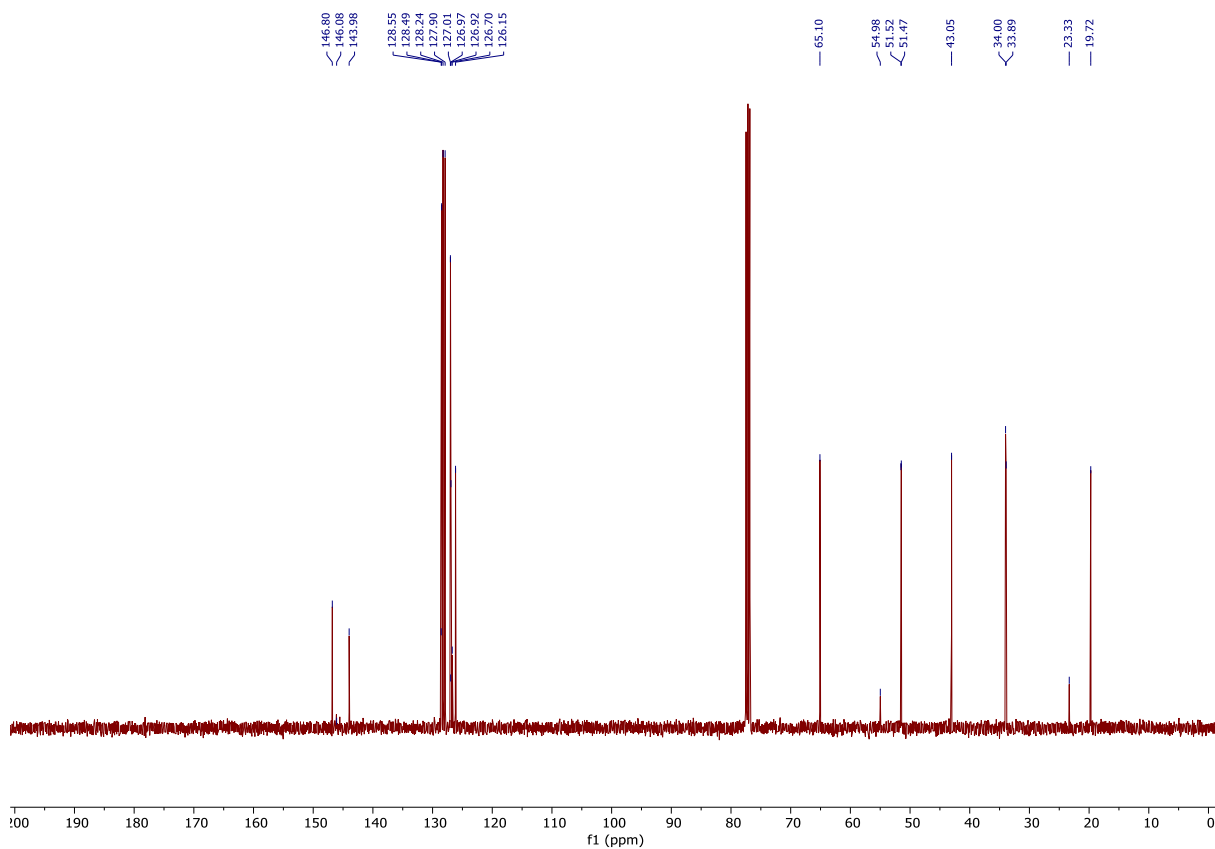

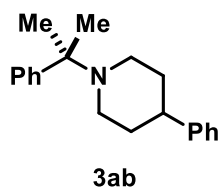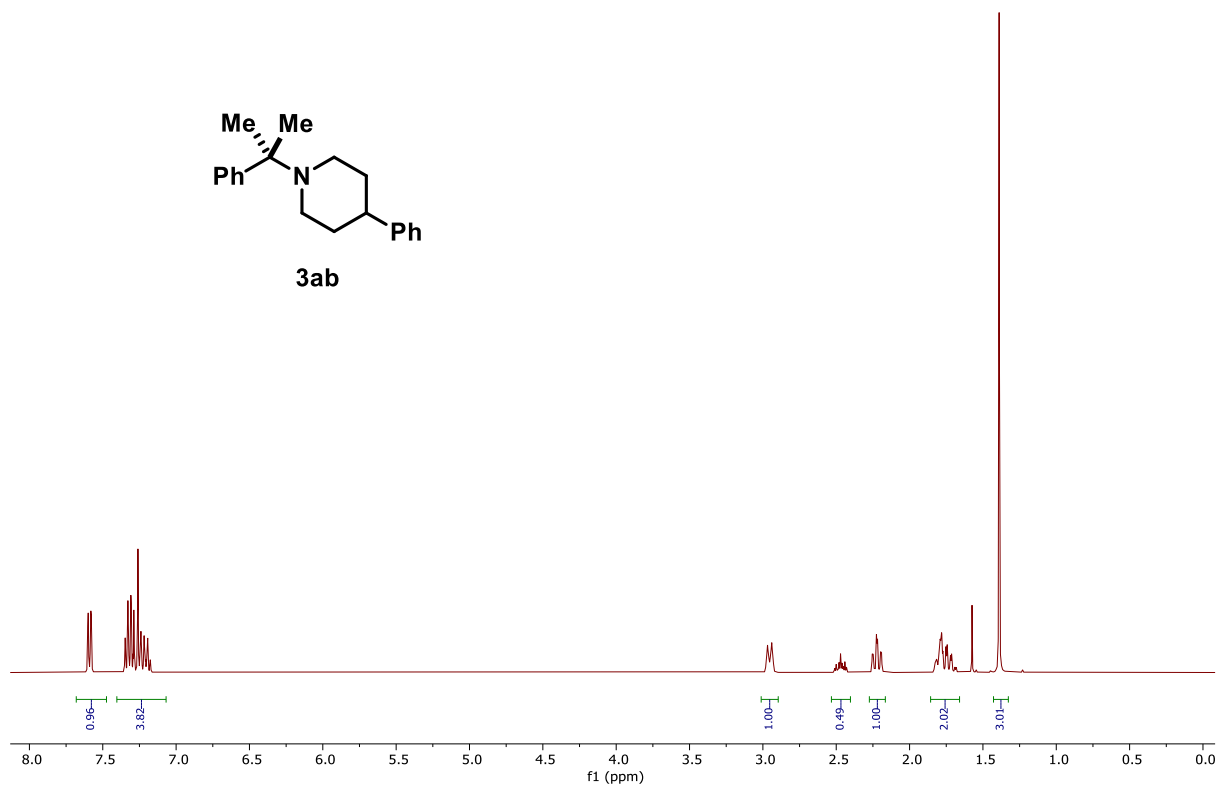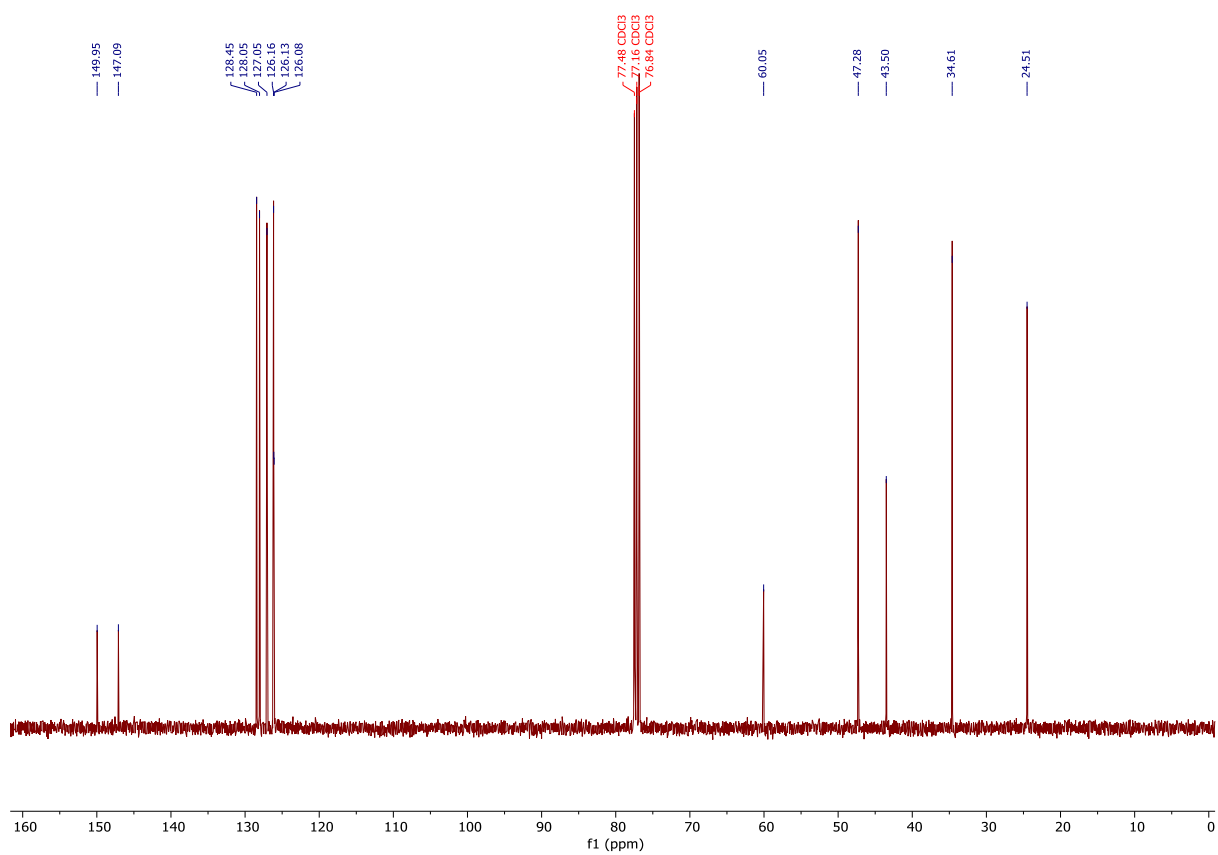



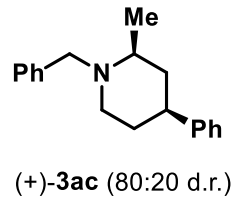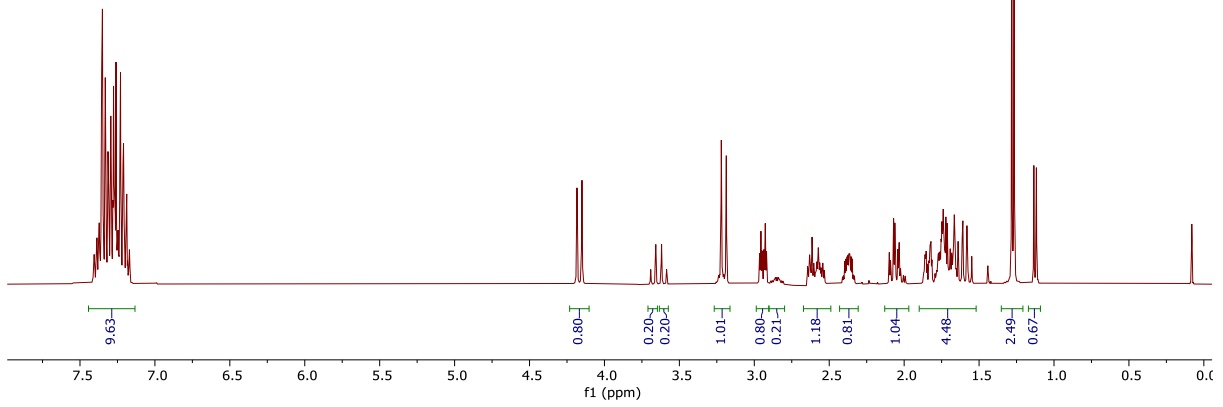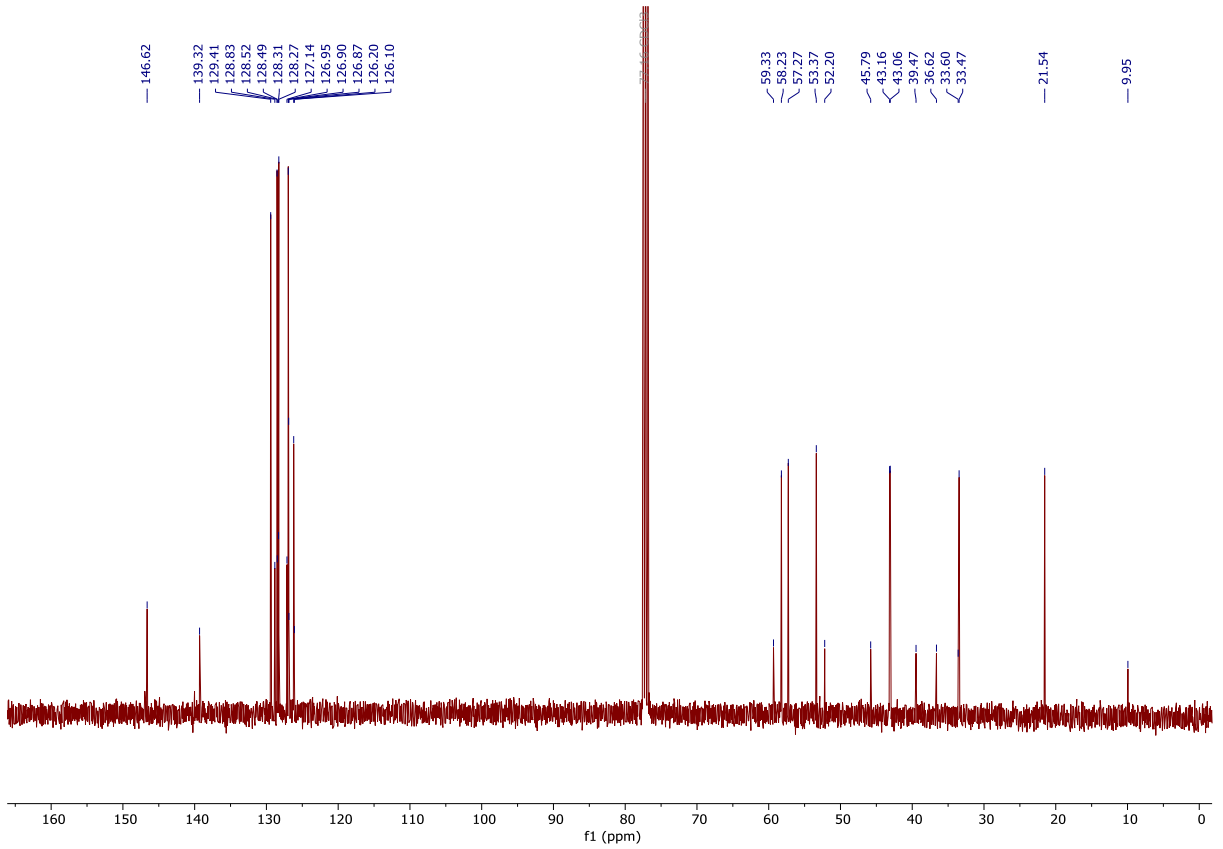

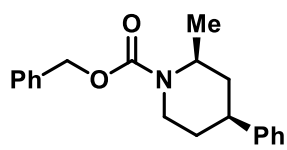

S3 (76:24 d.r.)

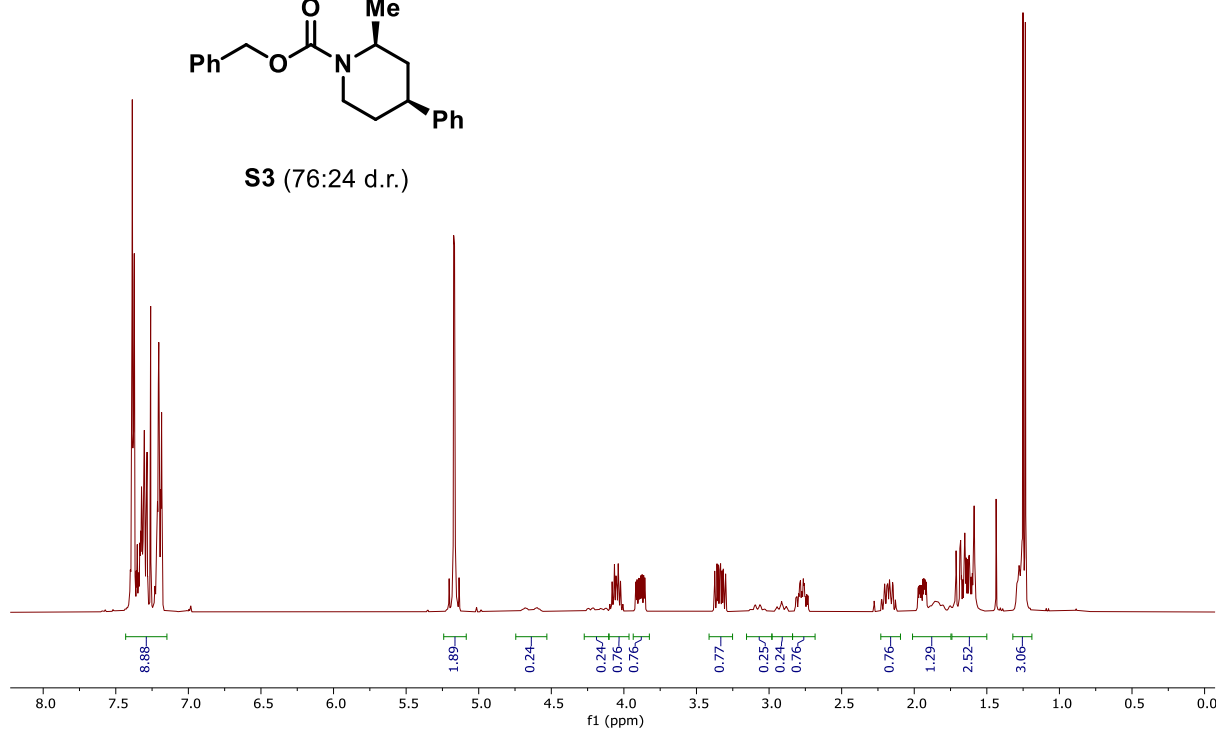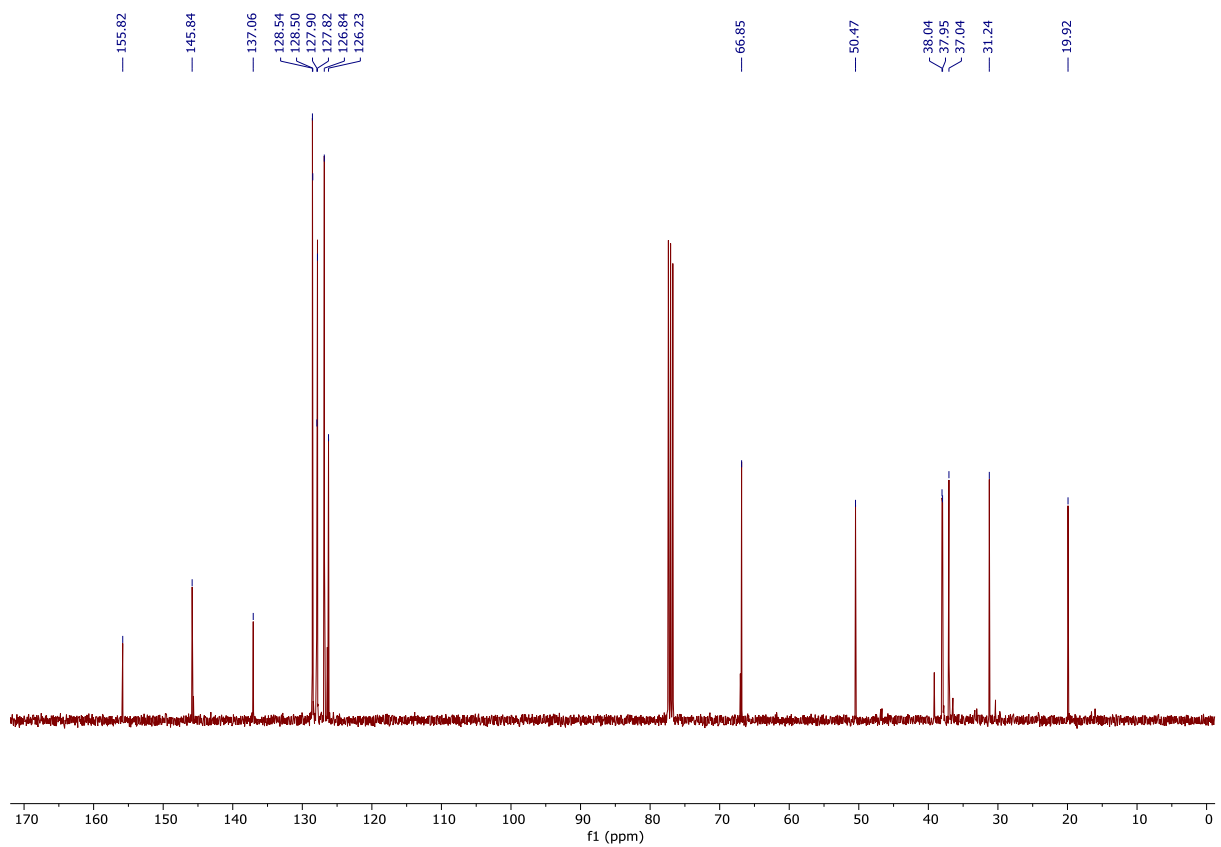

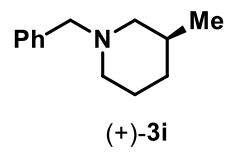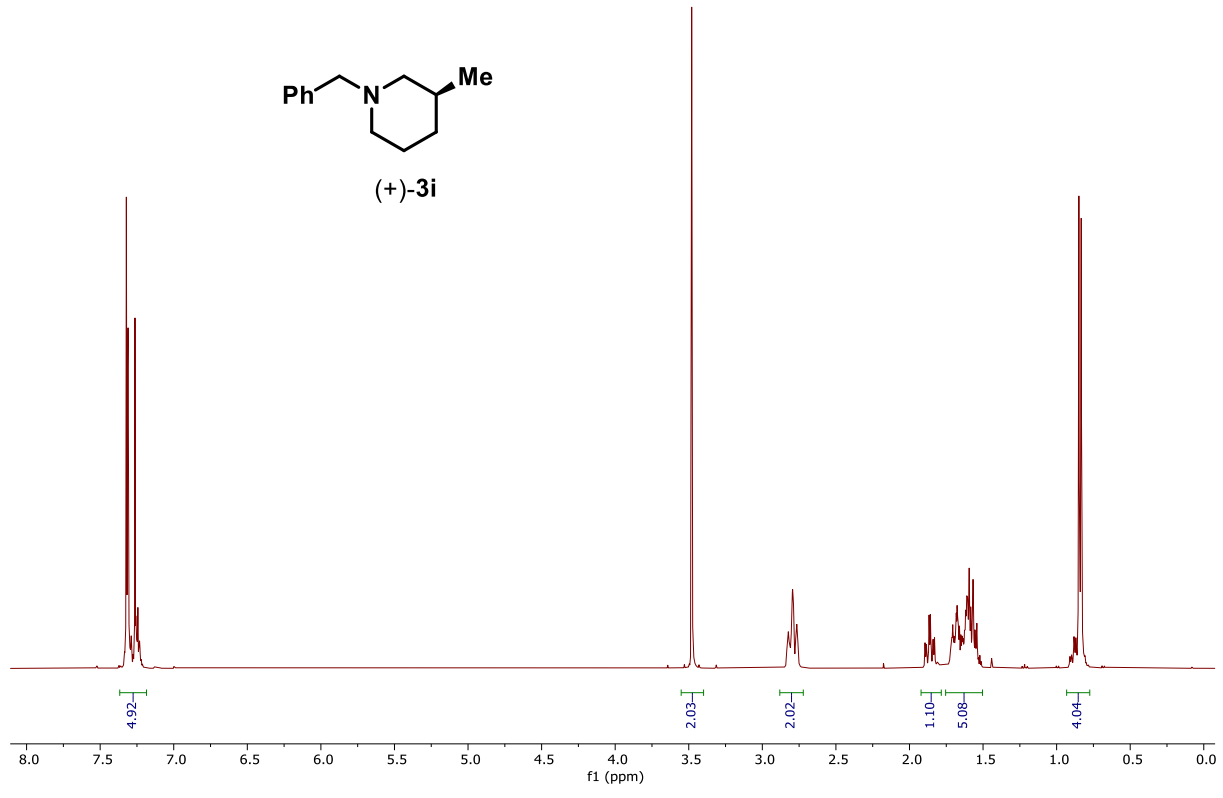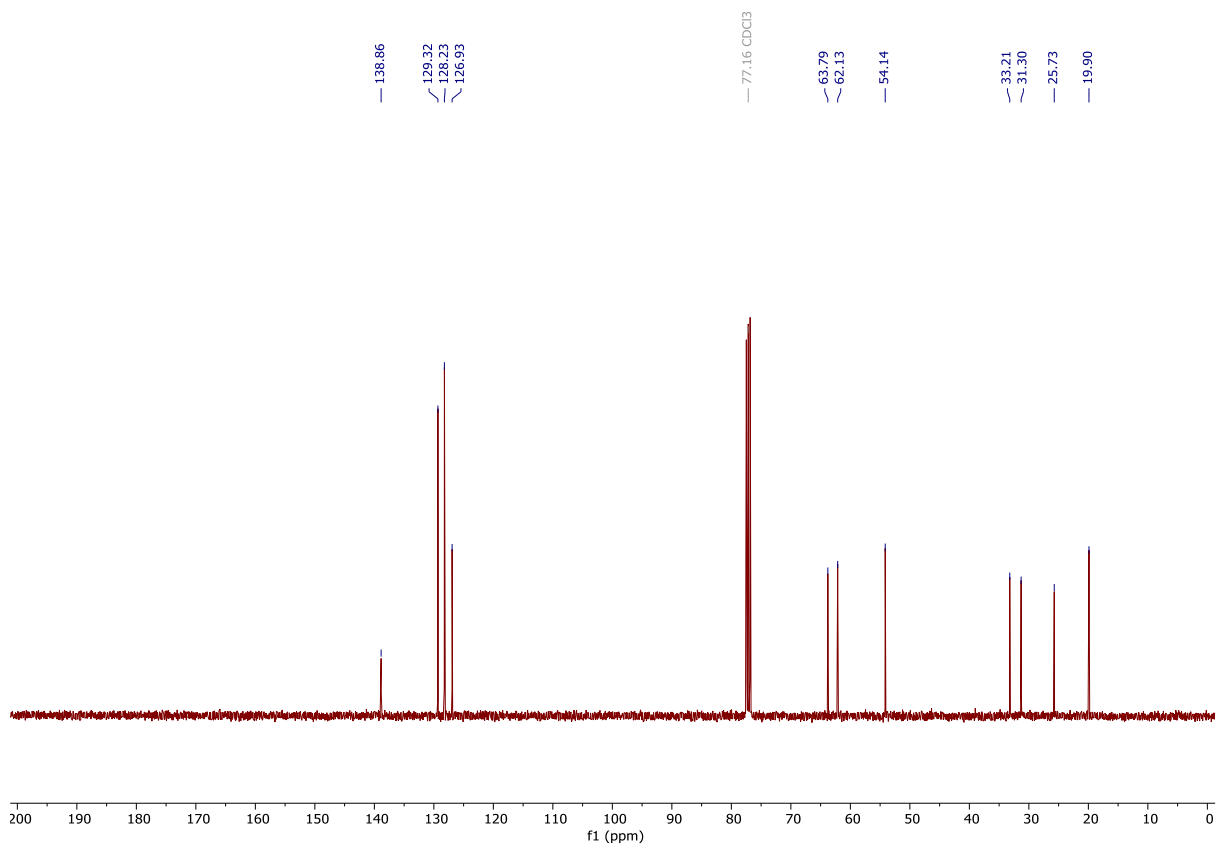

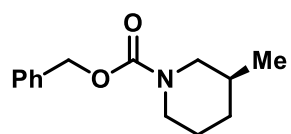

S4

$CDCl_3$ , 298 K

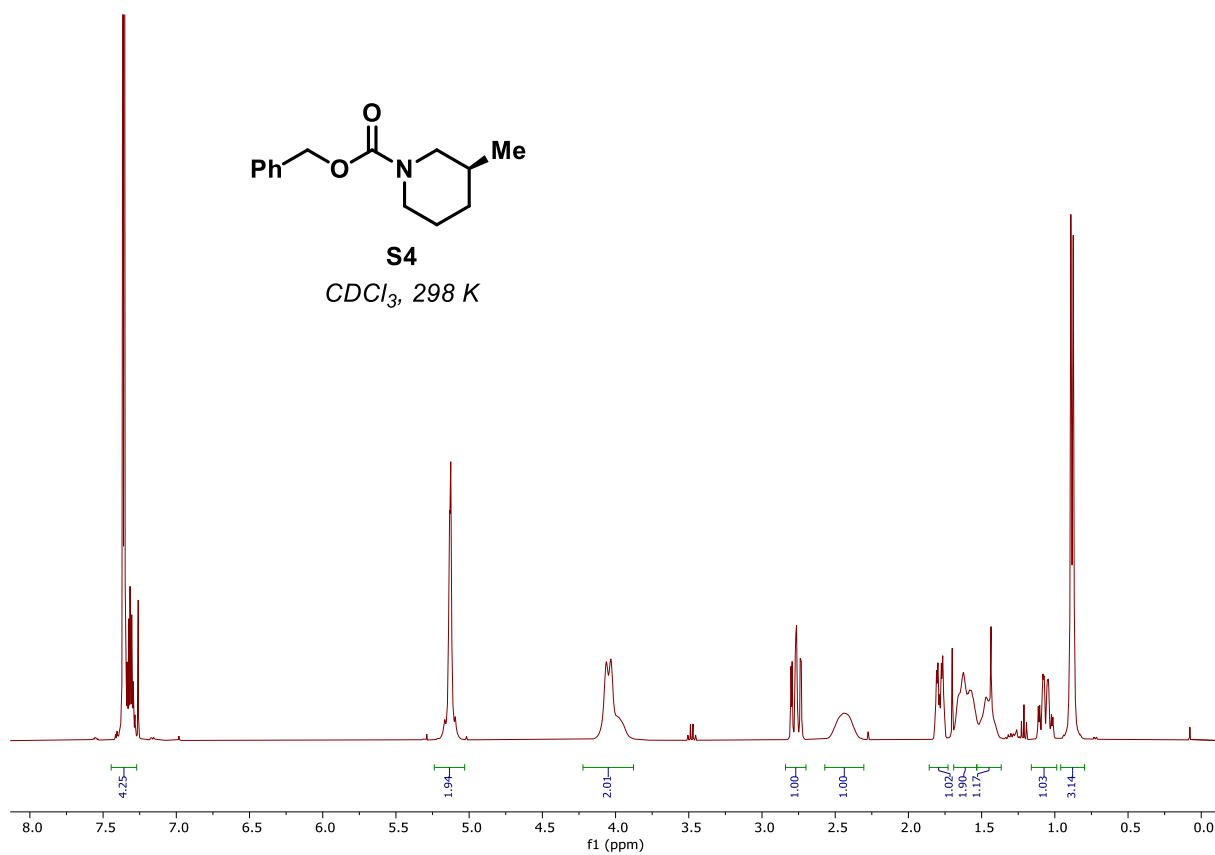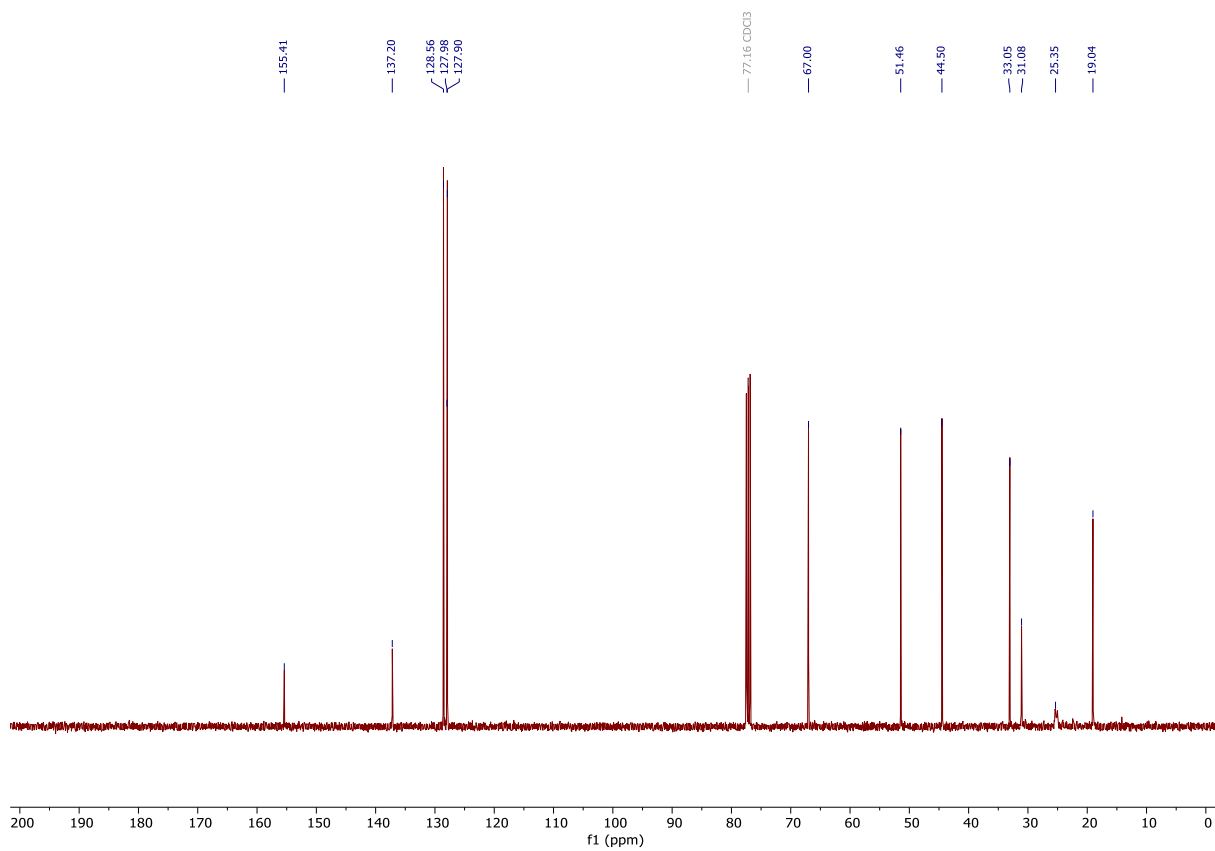

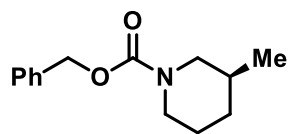

S4

*d*<sub>8</sub>-toluene, 363 K

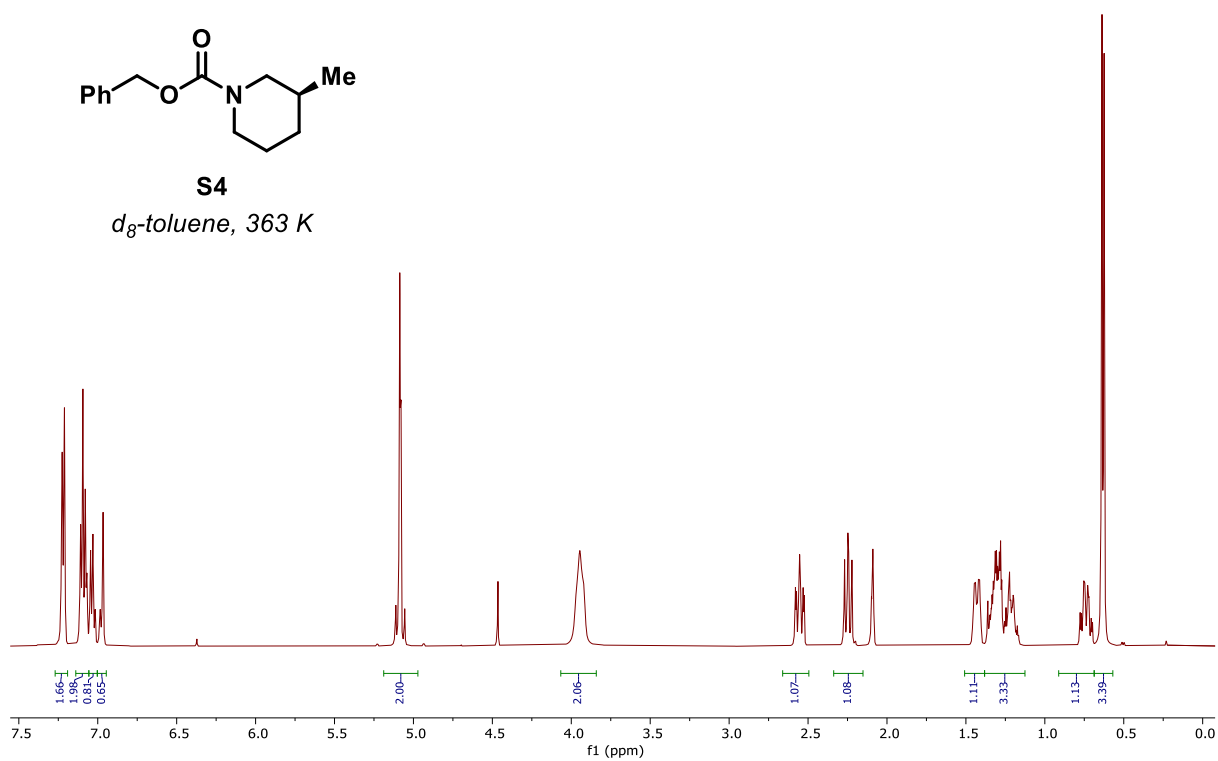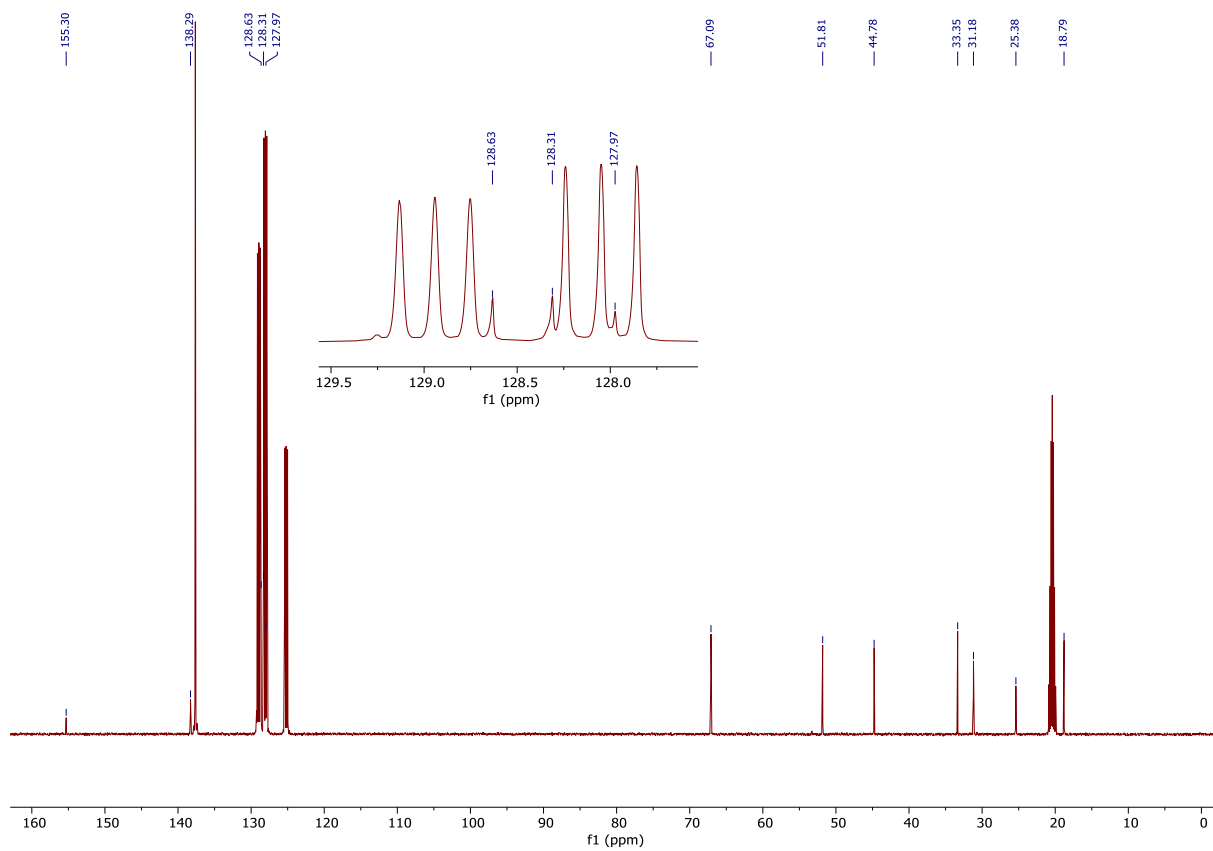

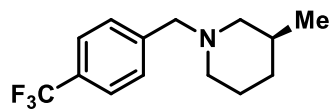

(+)-3ad

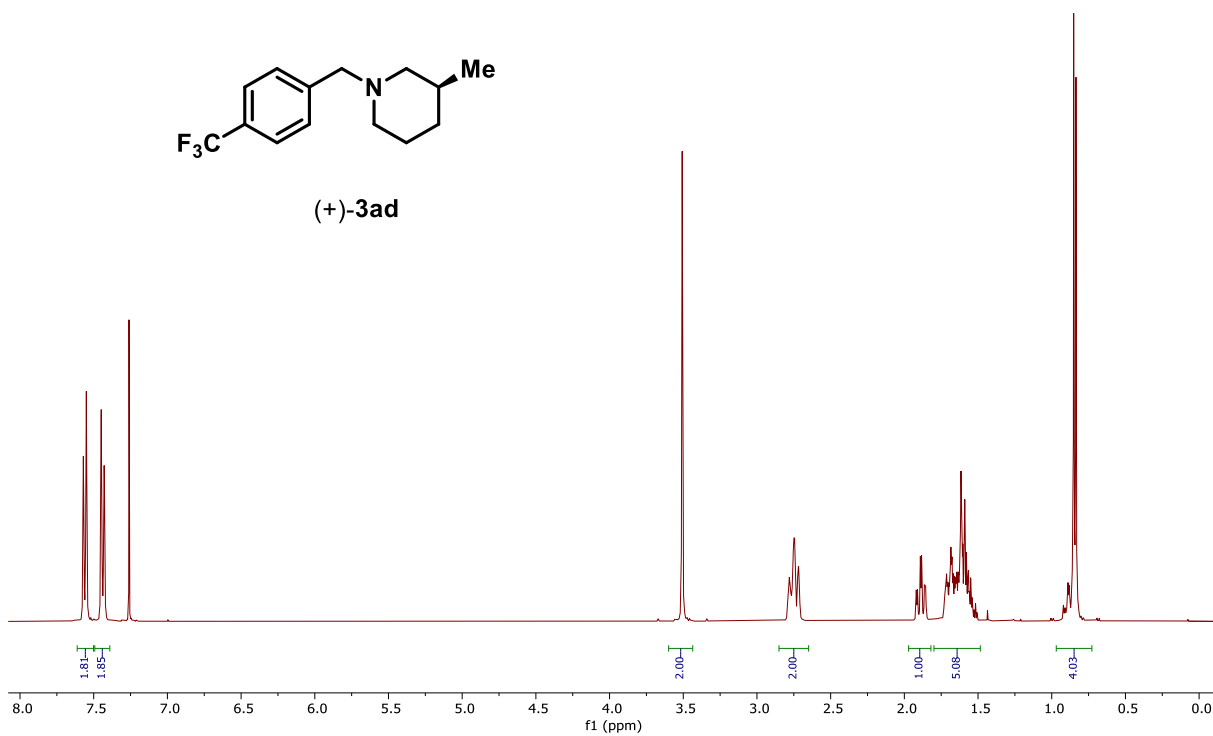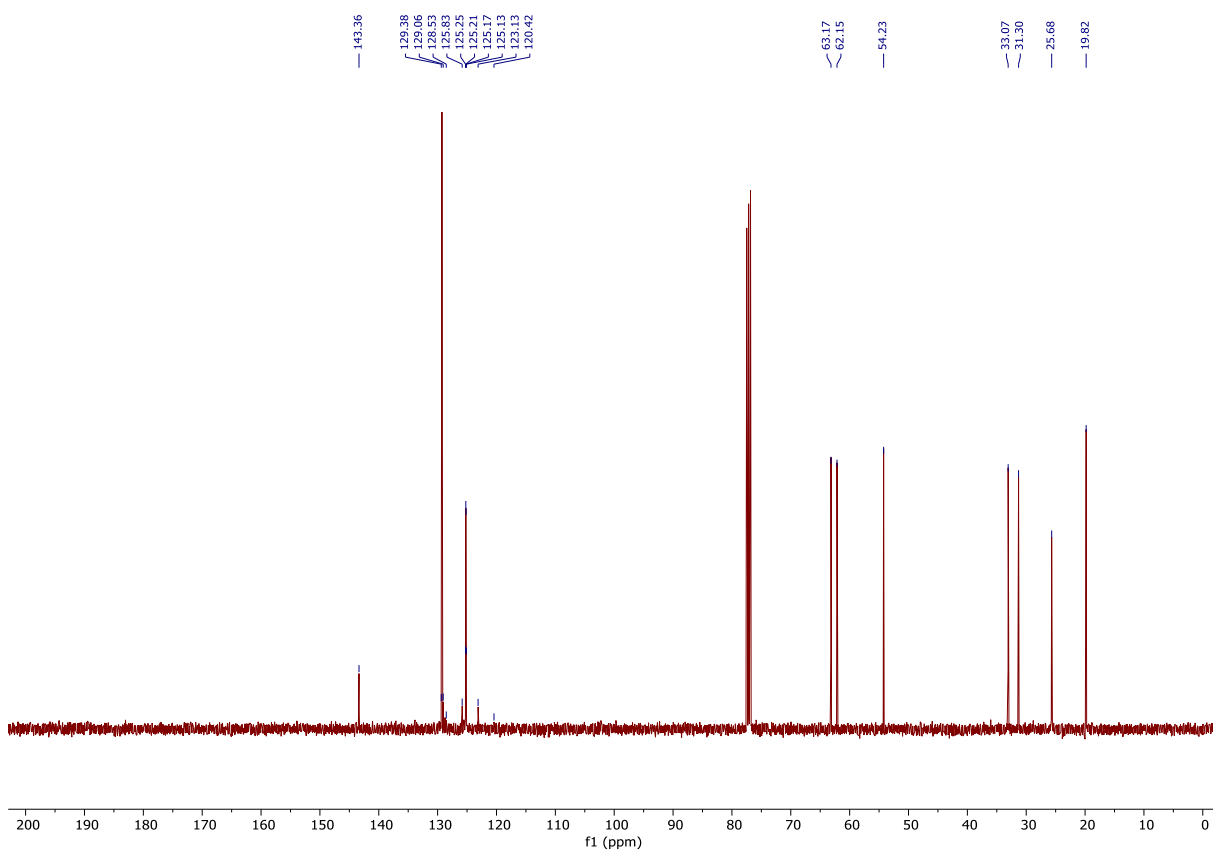

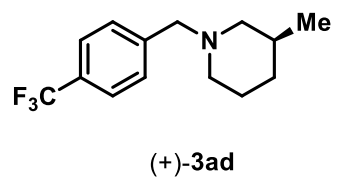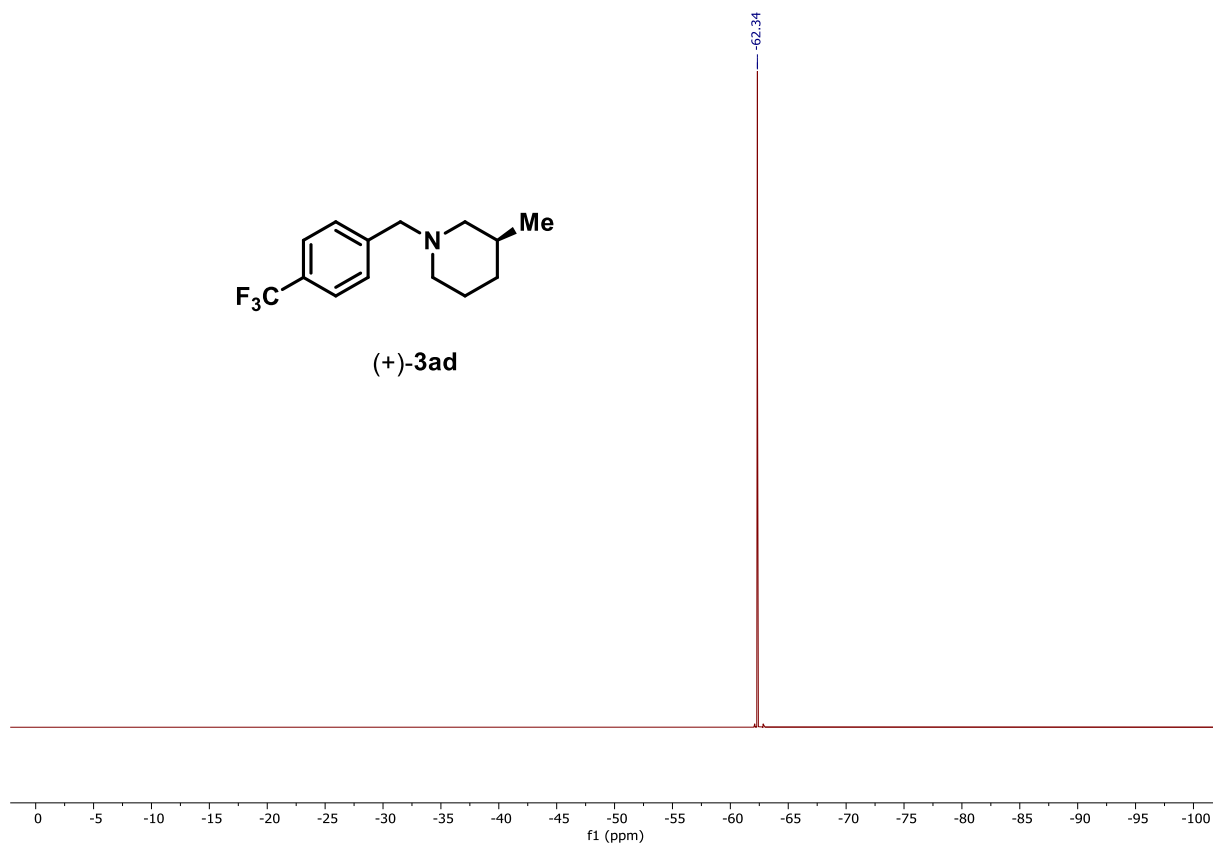

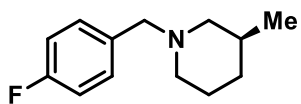

(+)-3ae

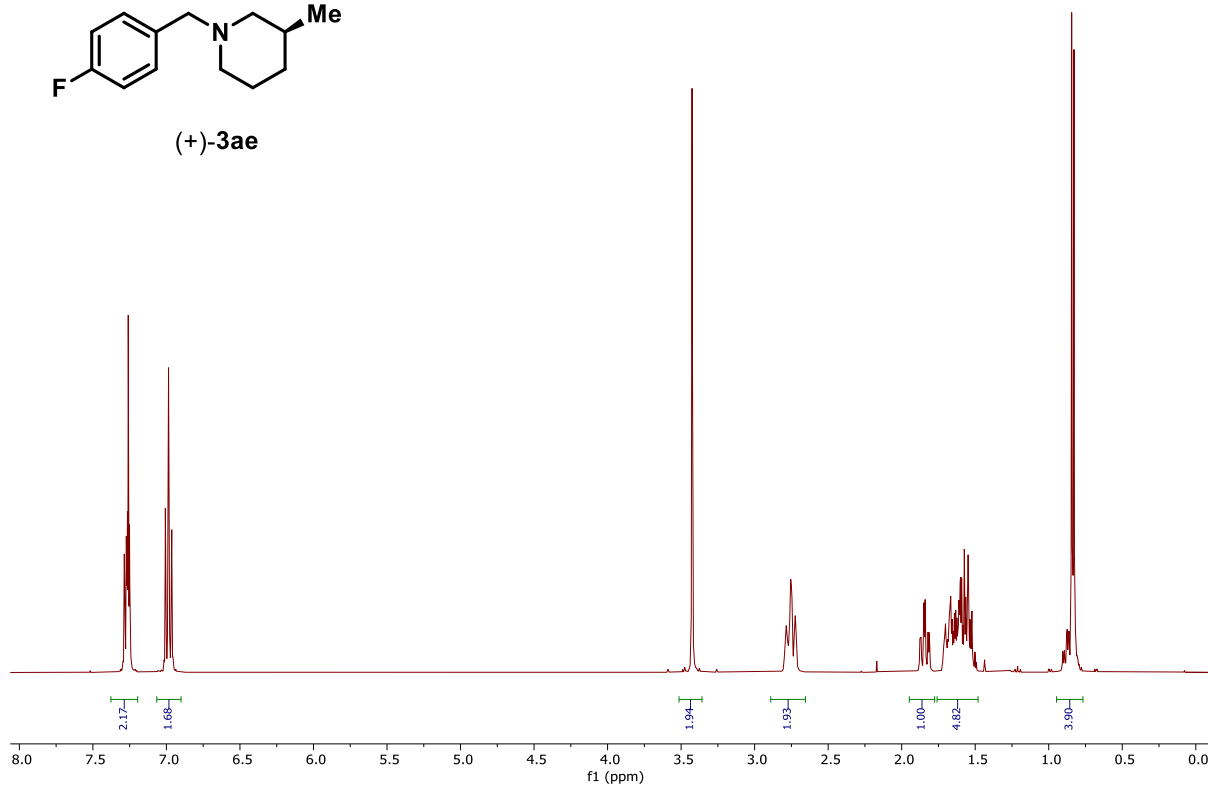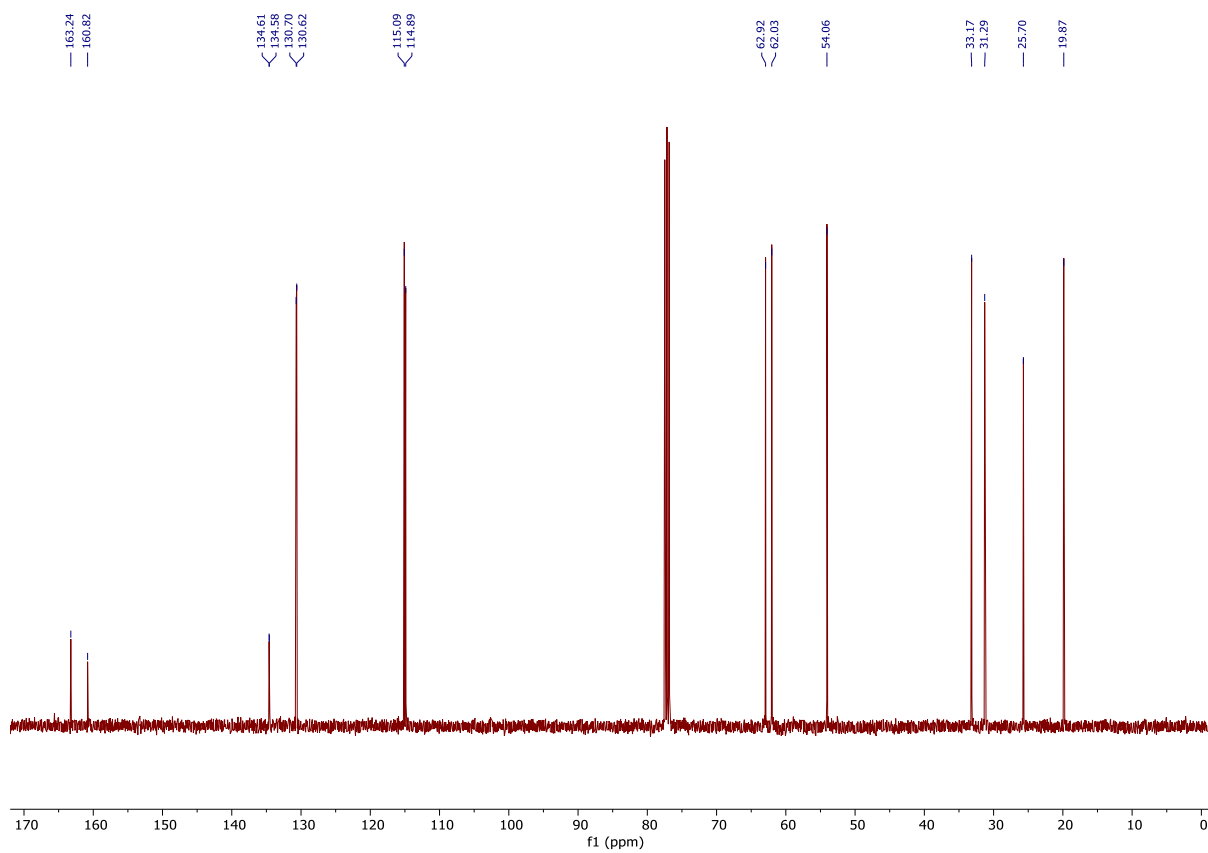



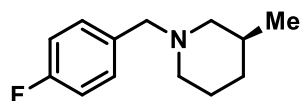

(+)-3ae

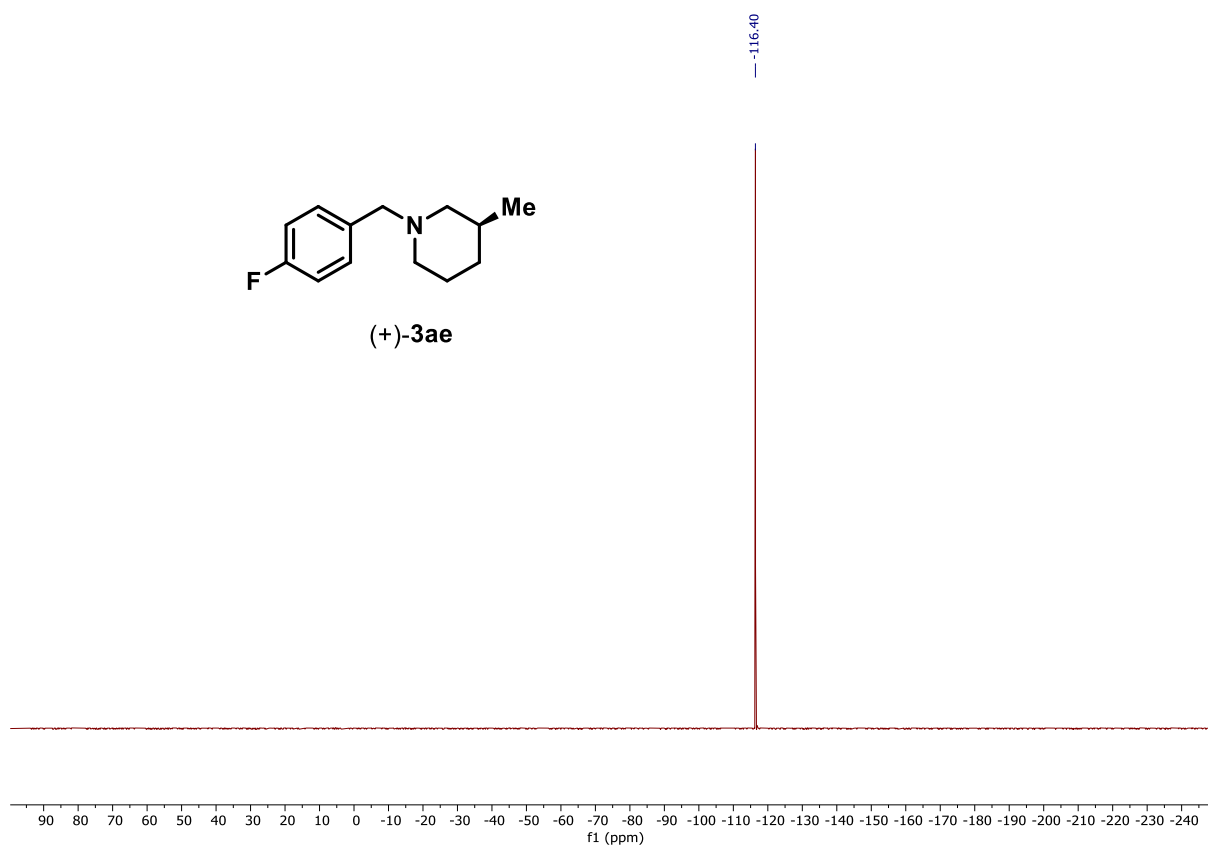

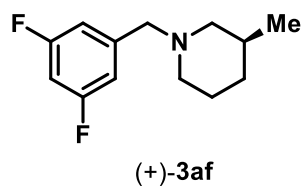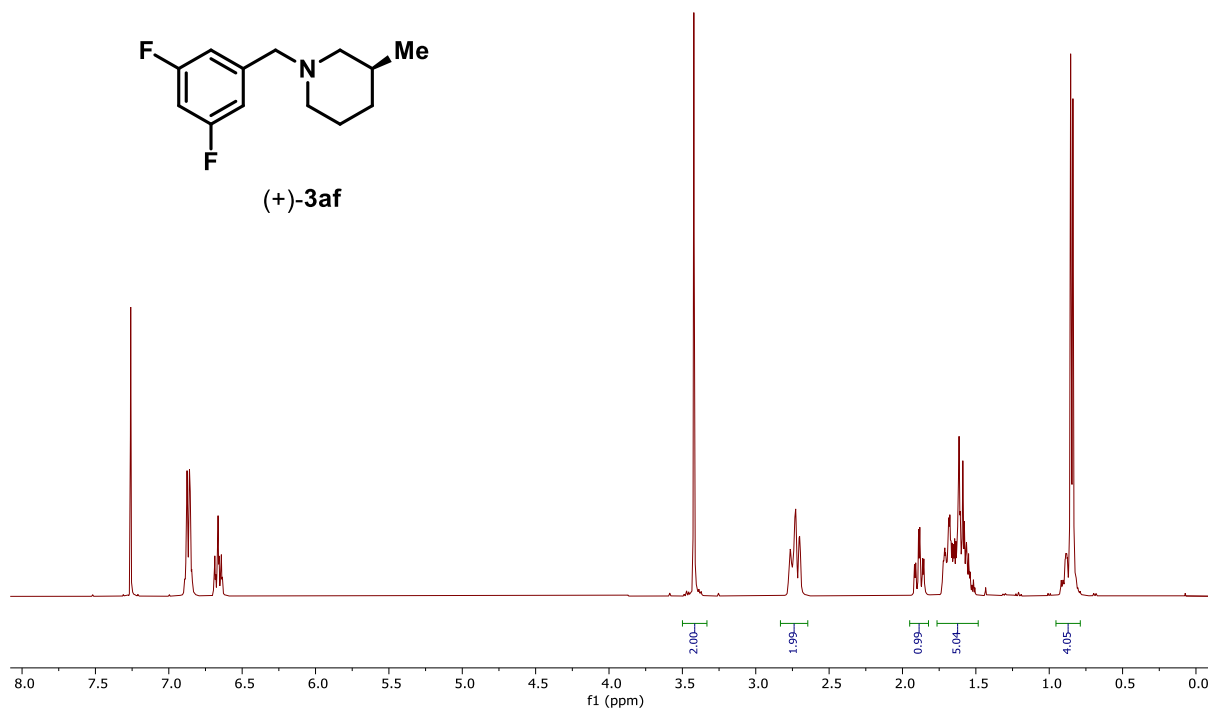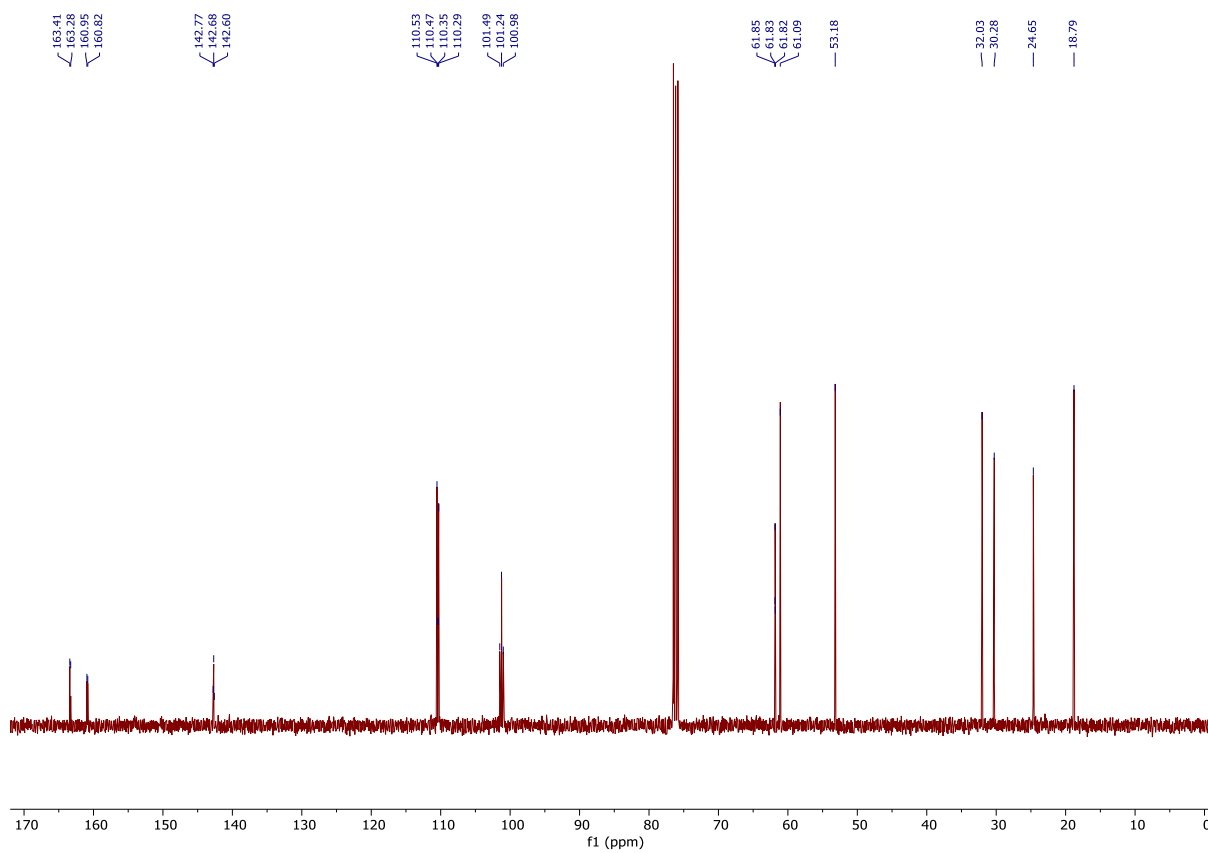

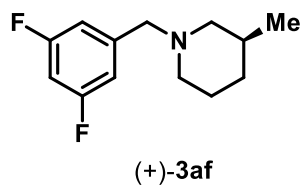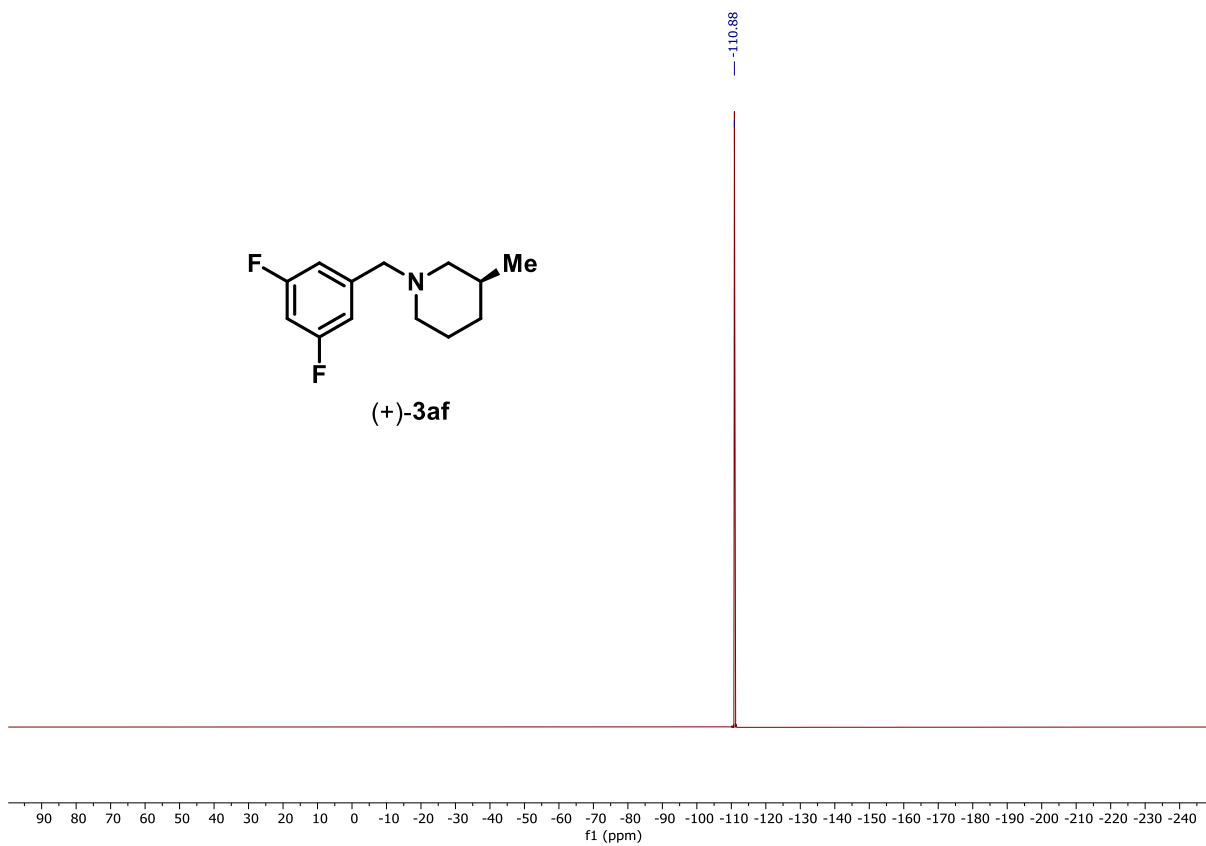

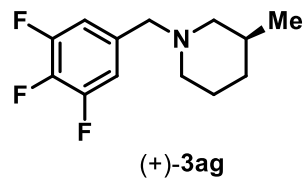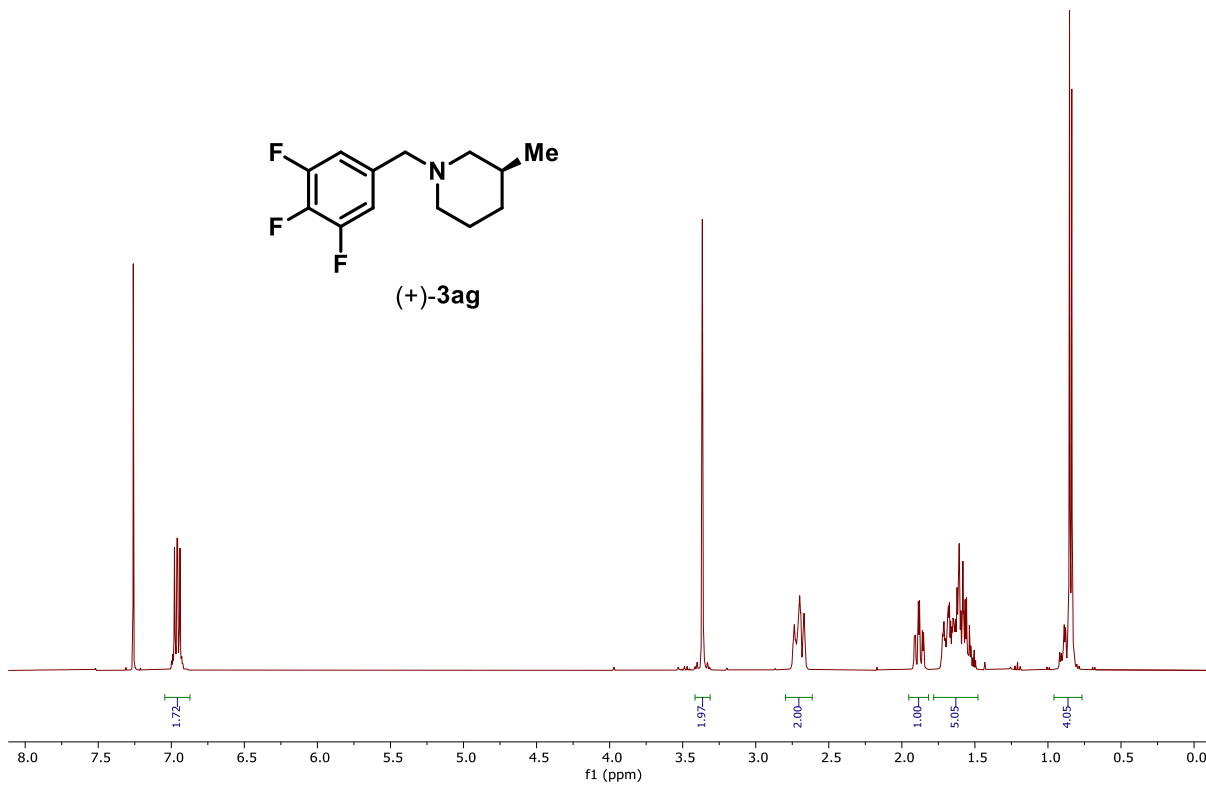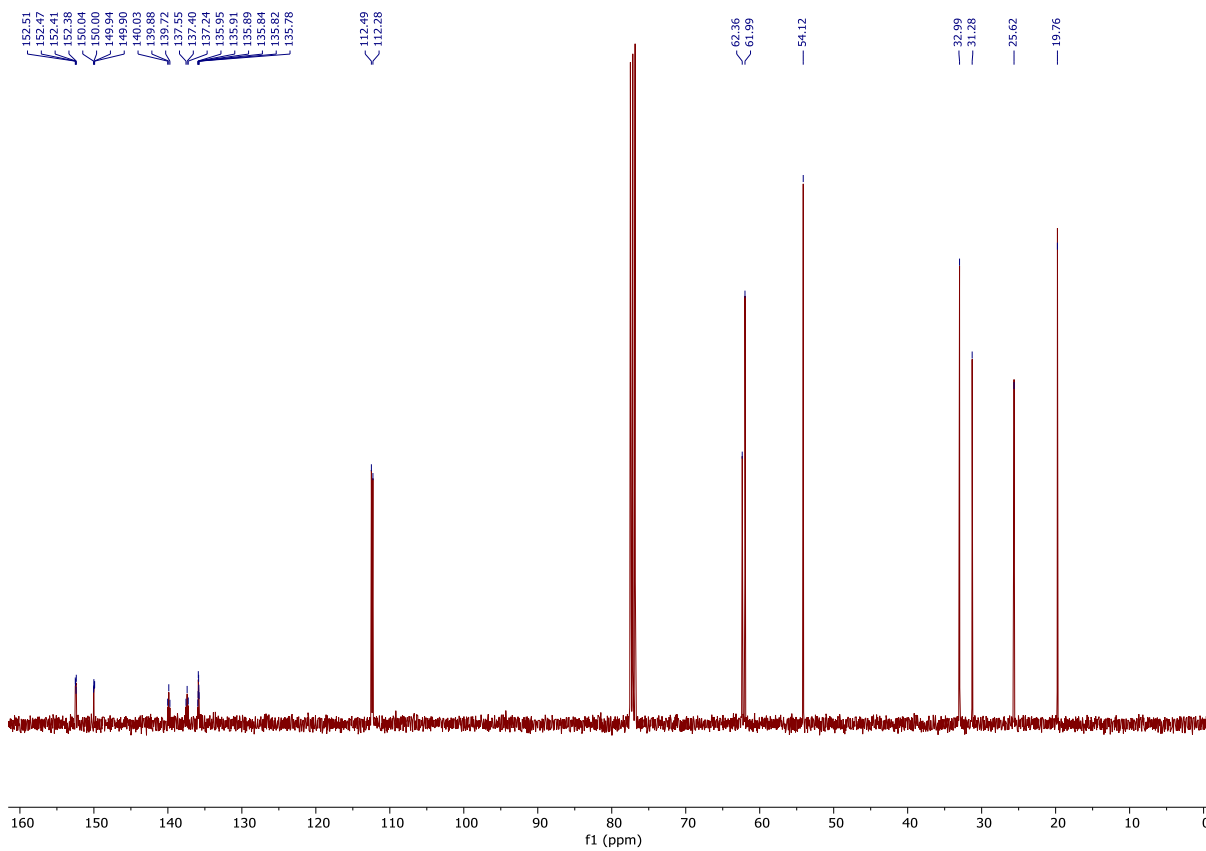

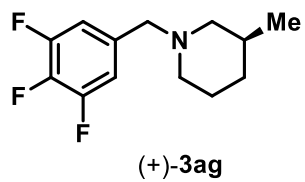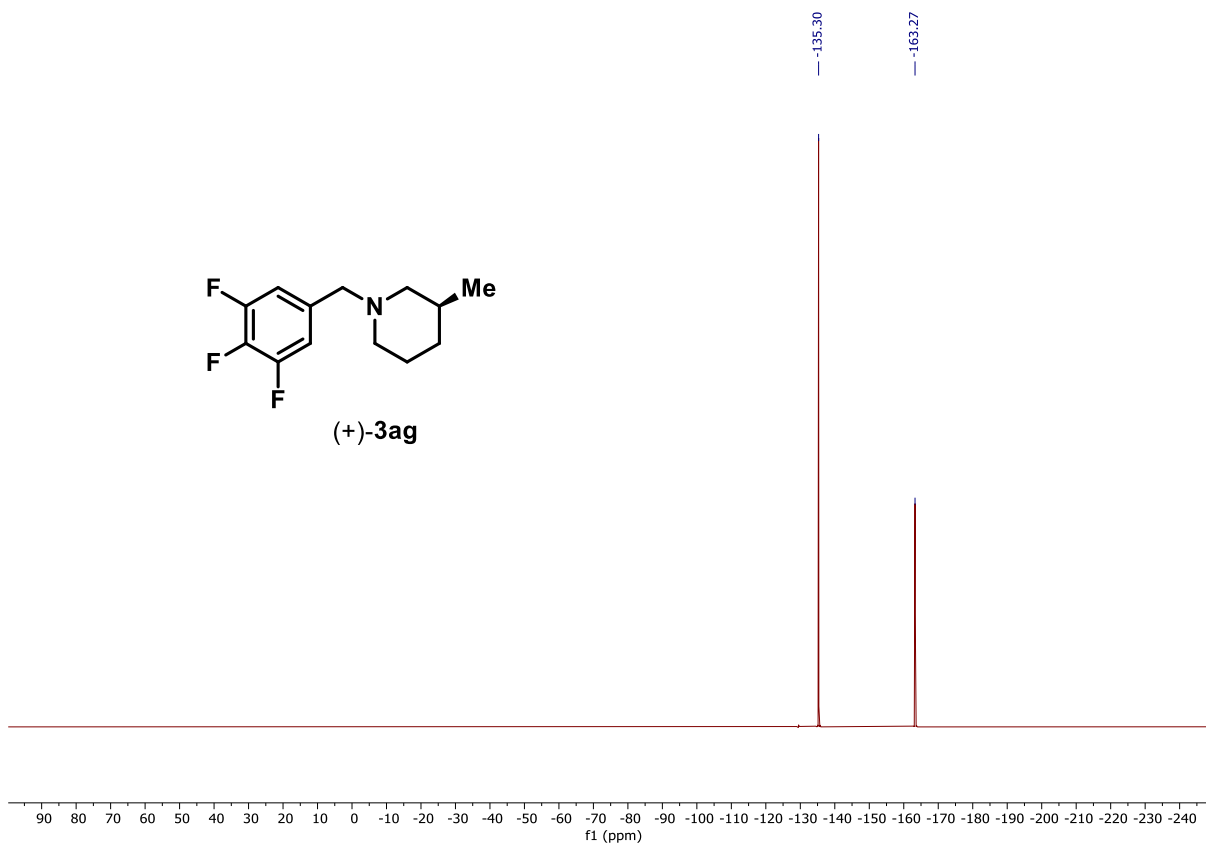

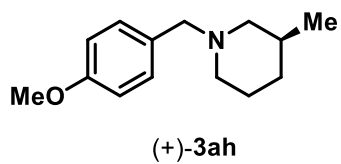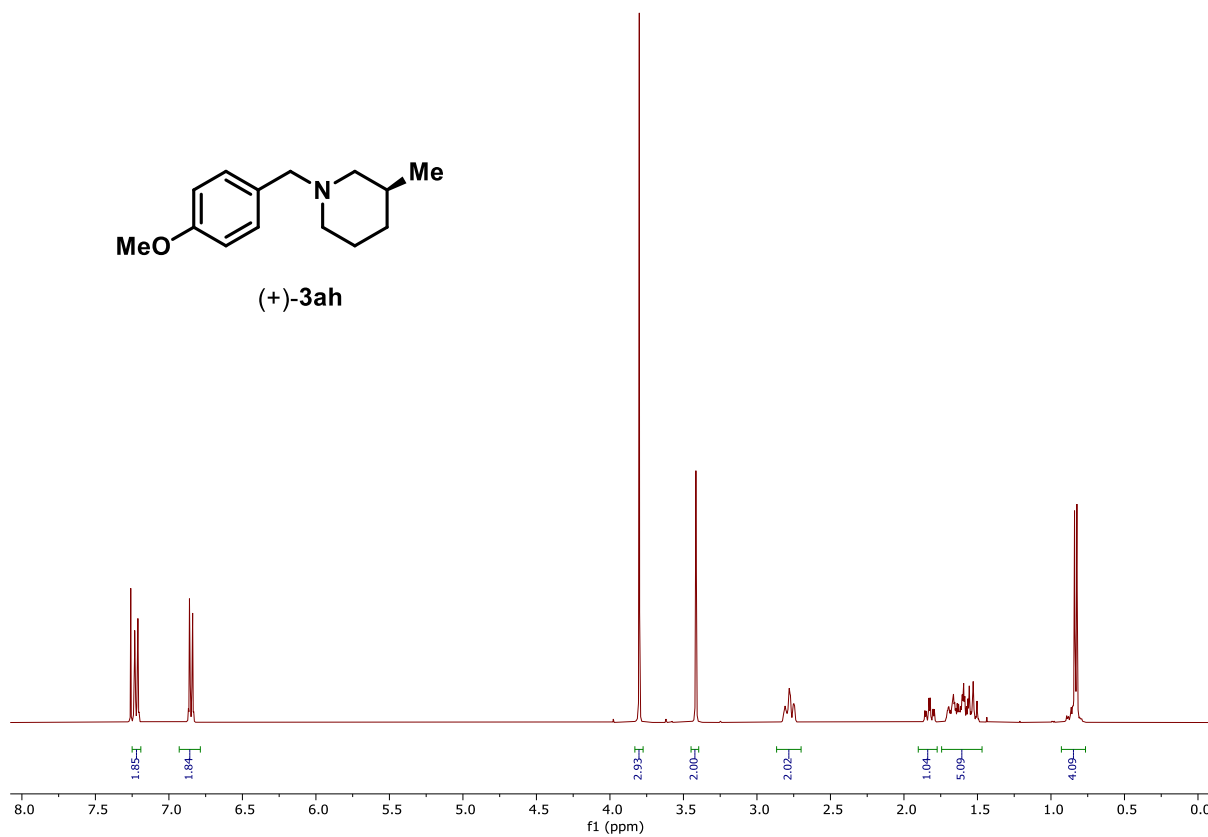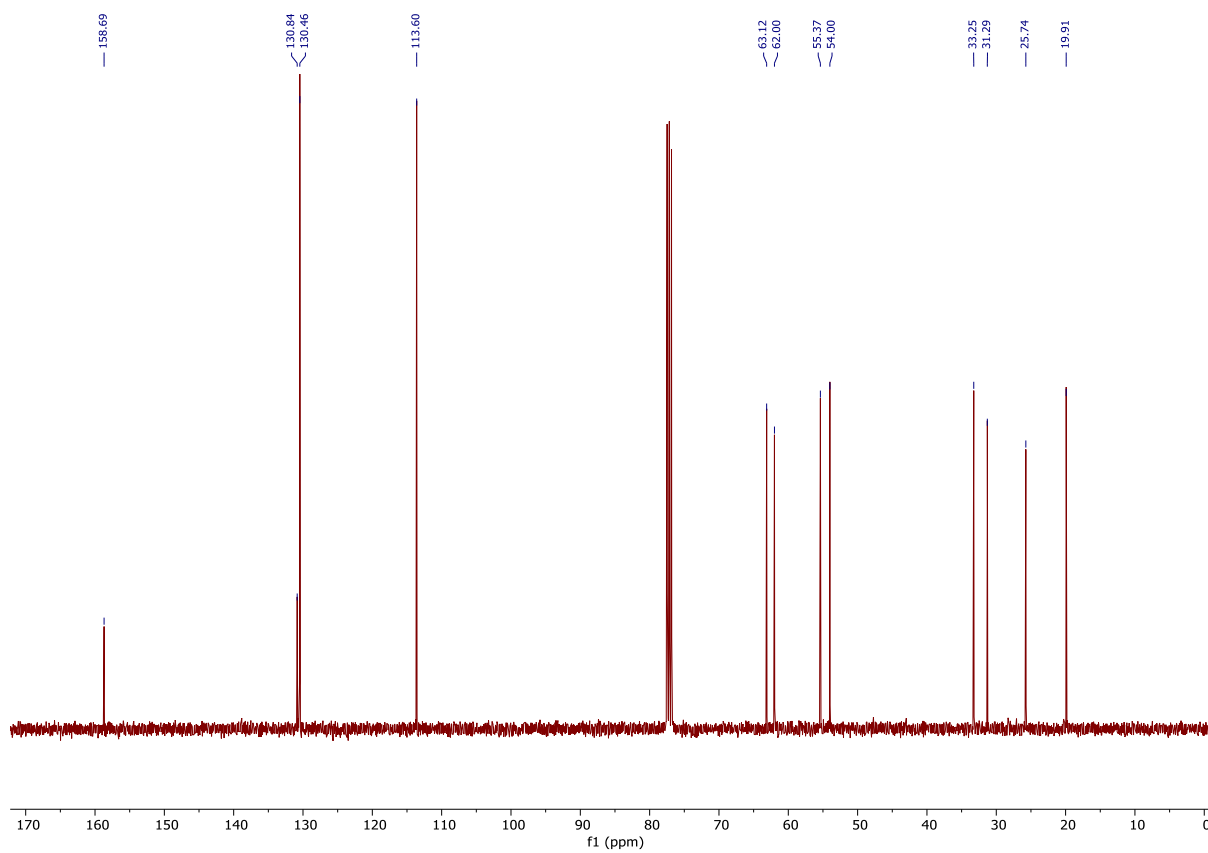

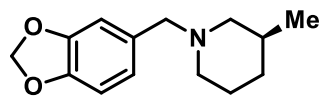

(+)-3ai

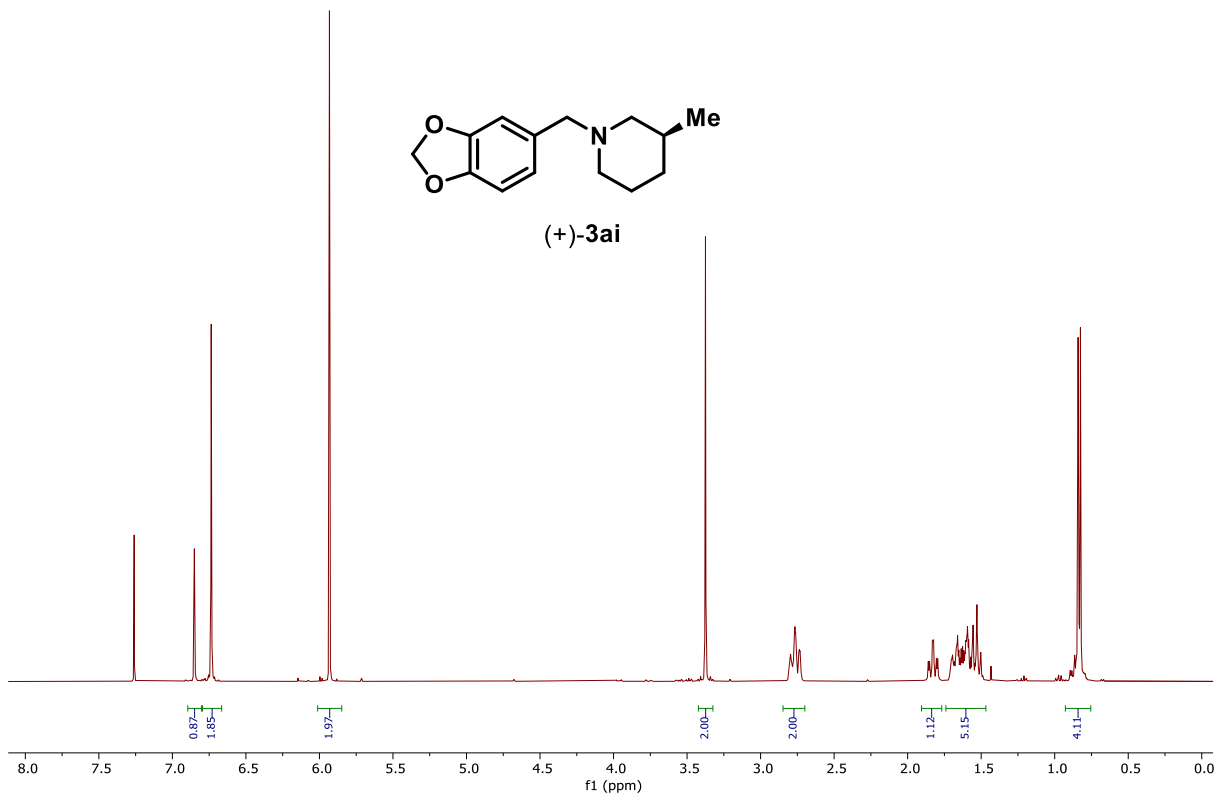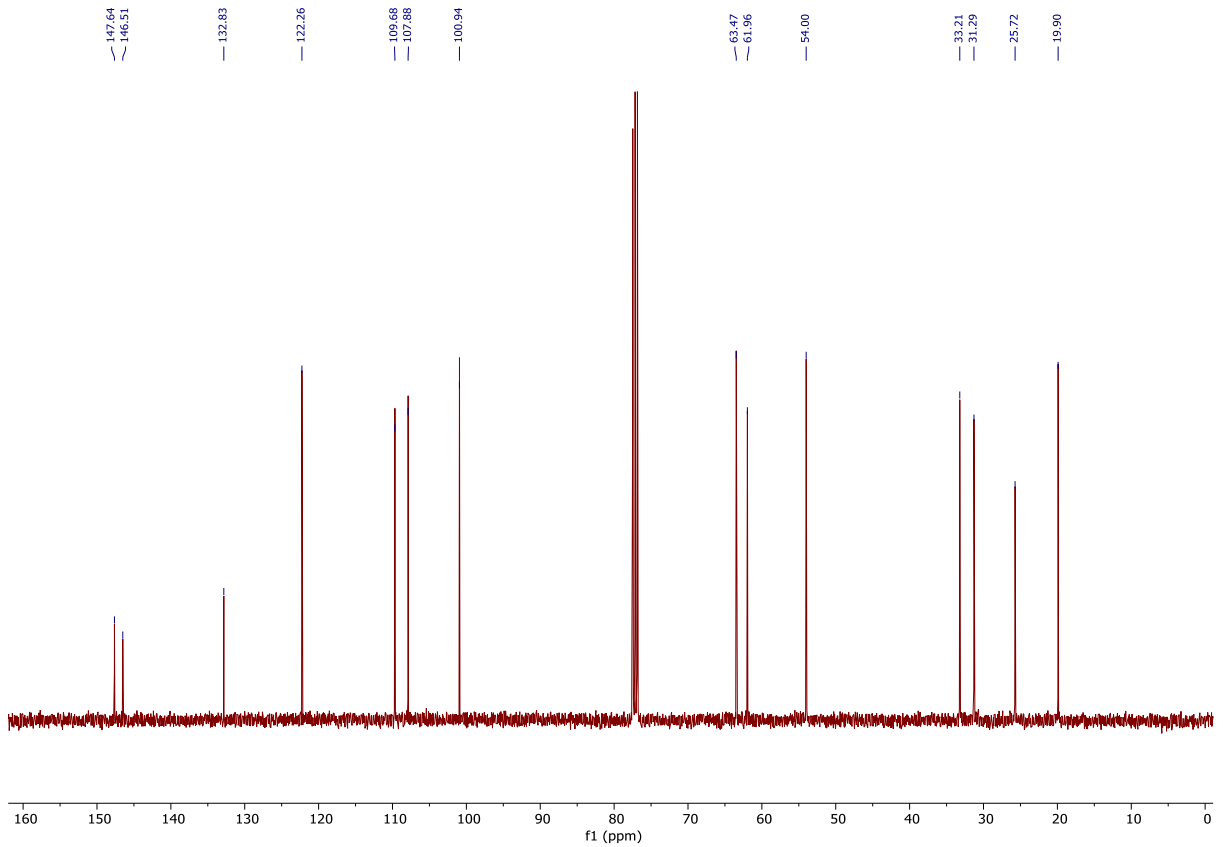

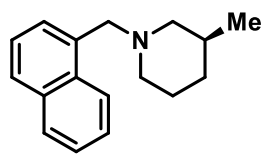

(+)-3aj

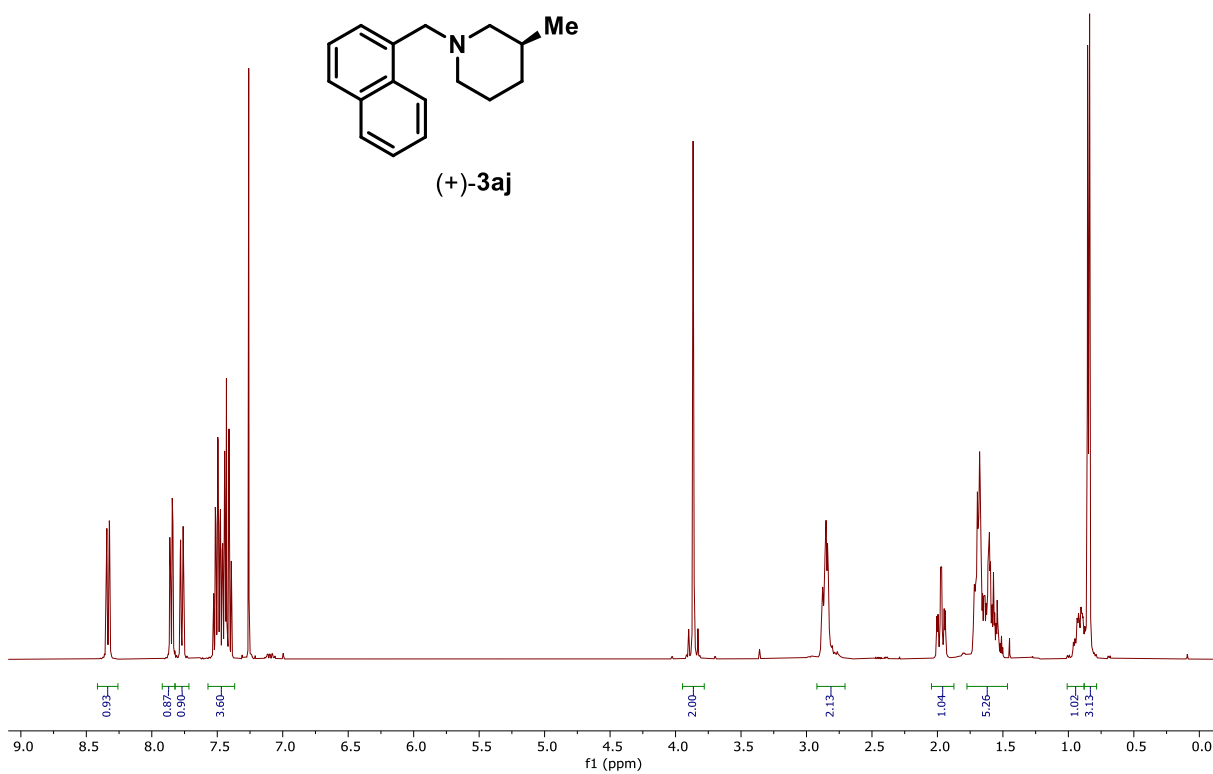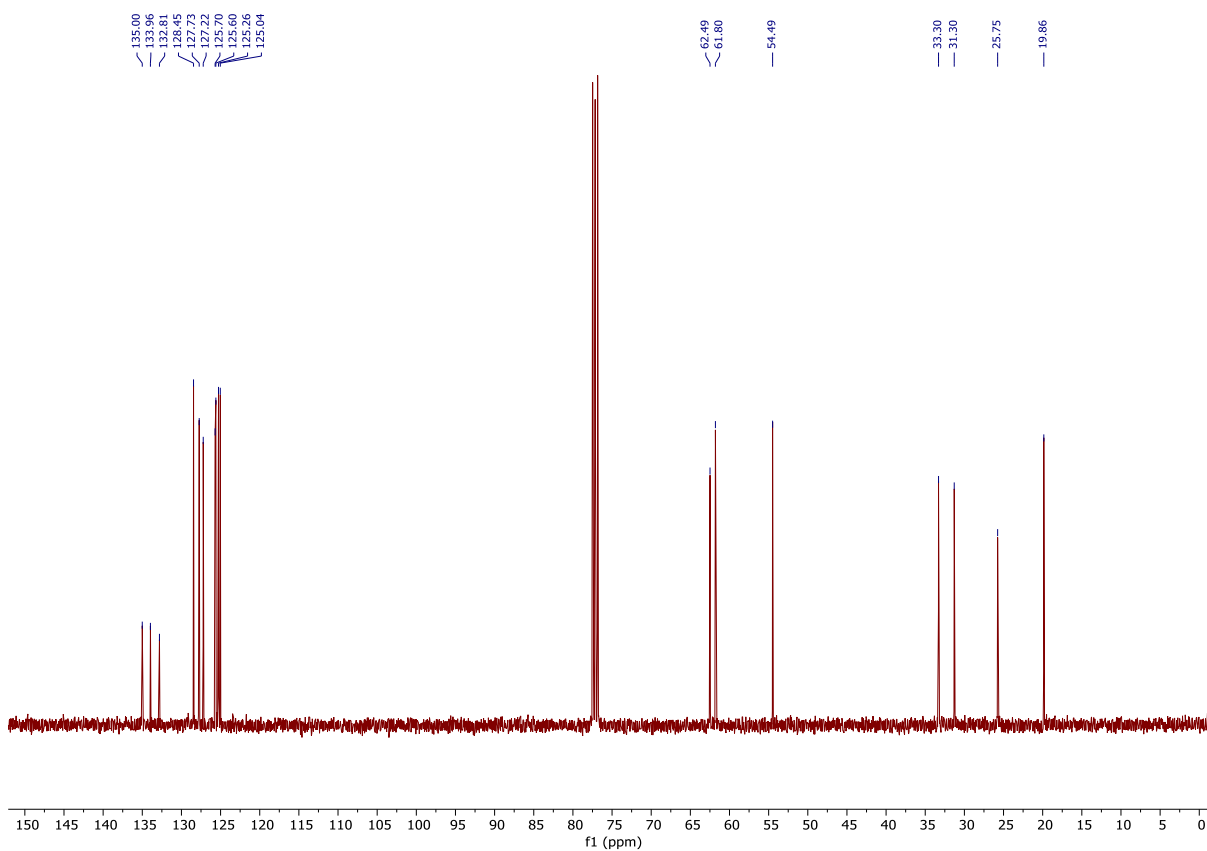



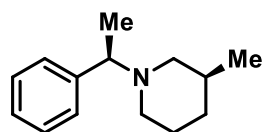

(+)-3ak (85:15 d.r.)

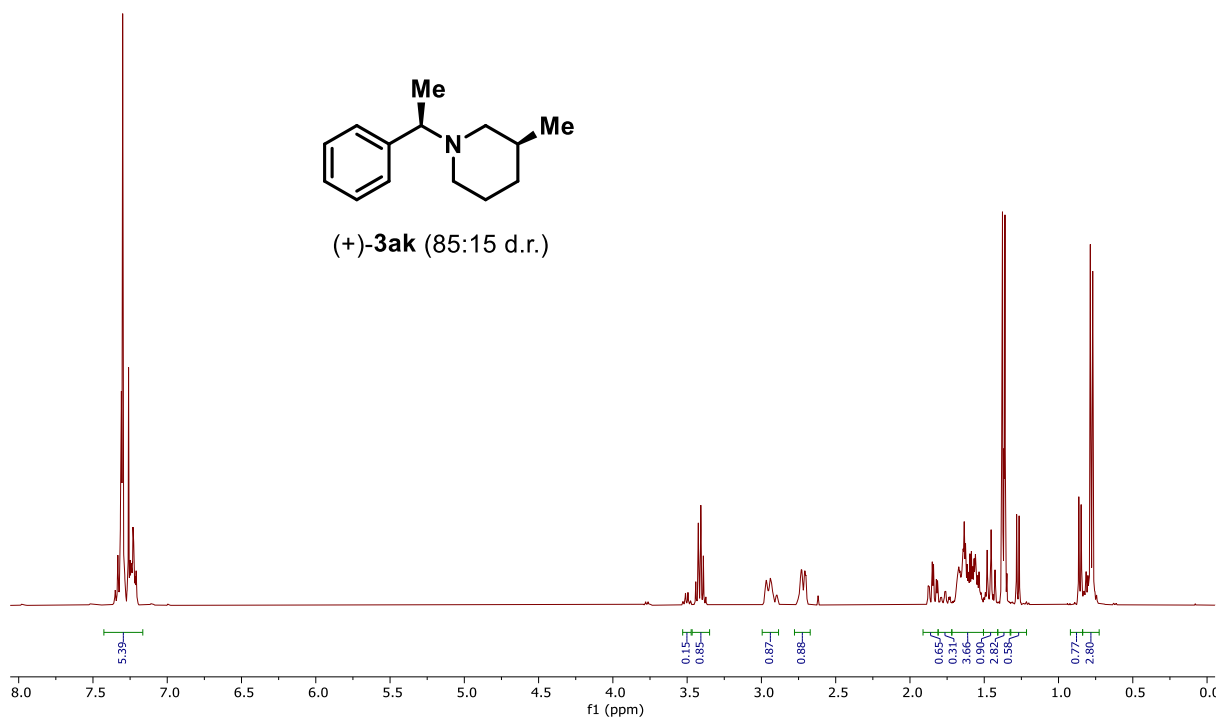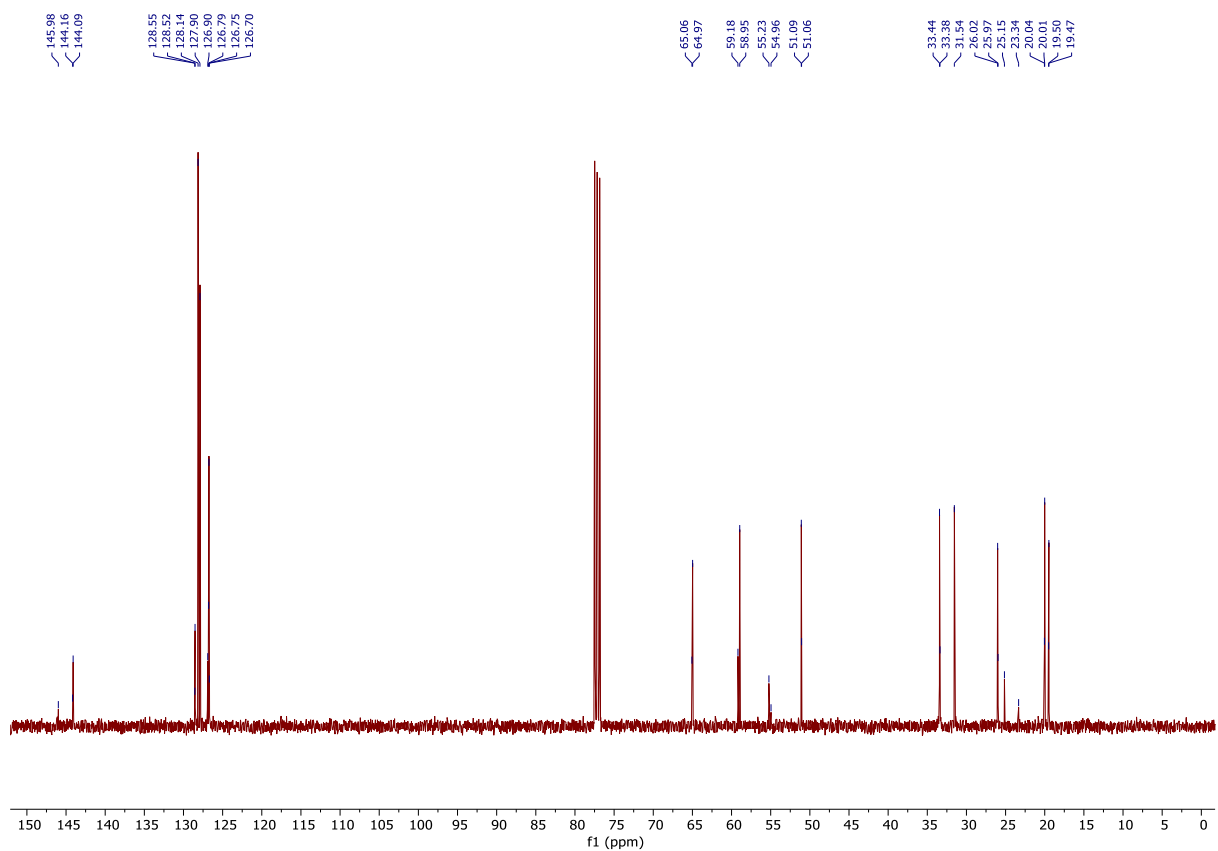

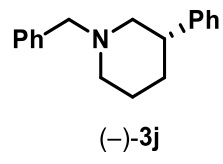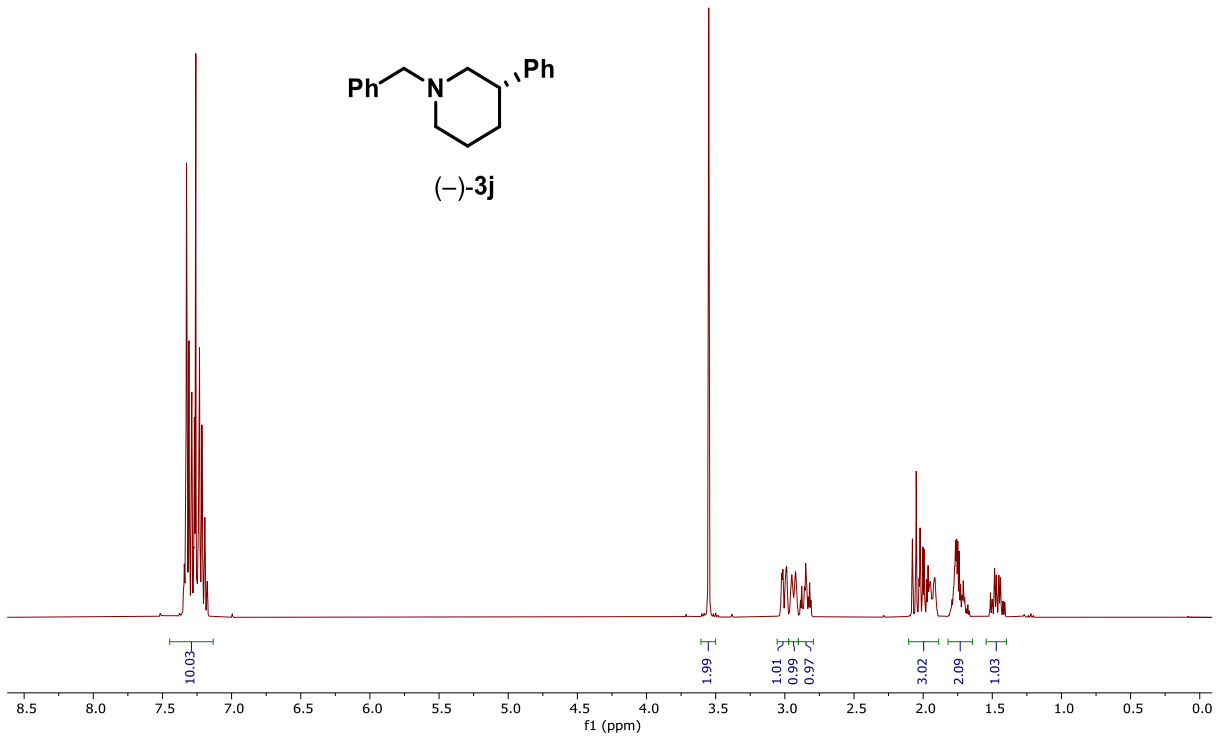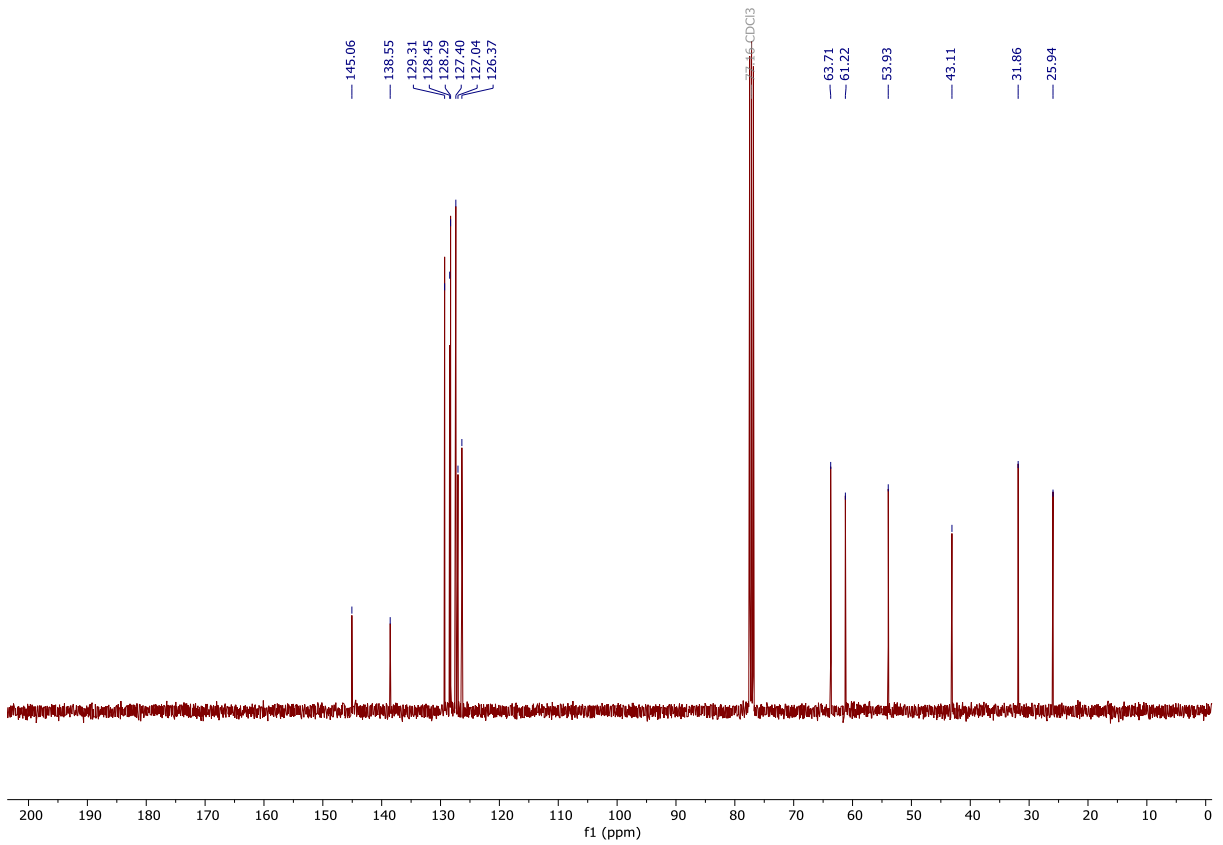

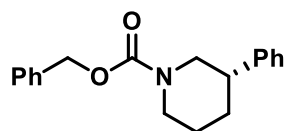

S5

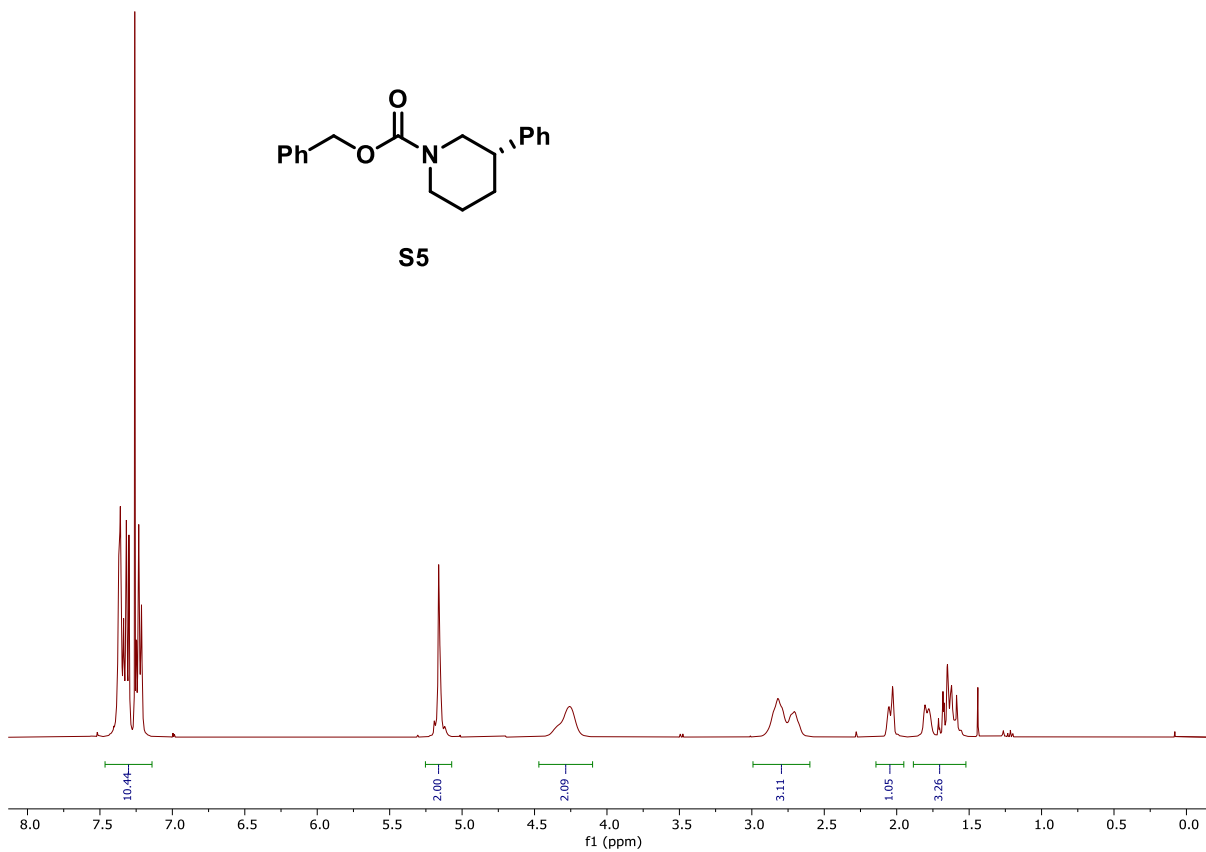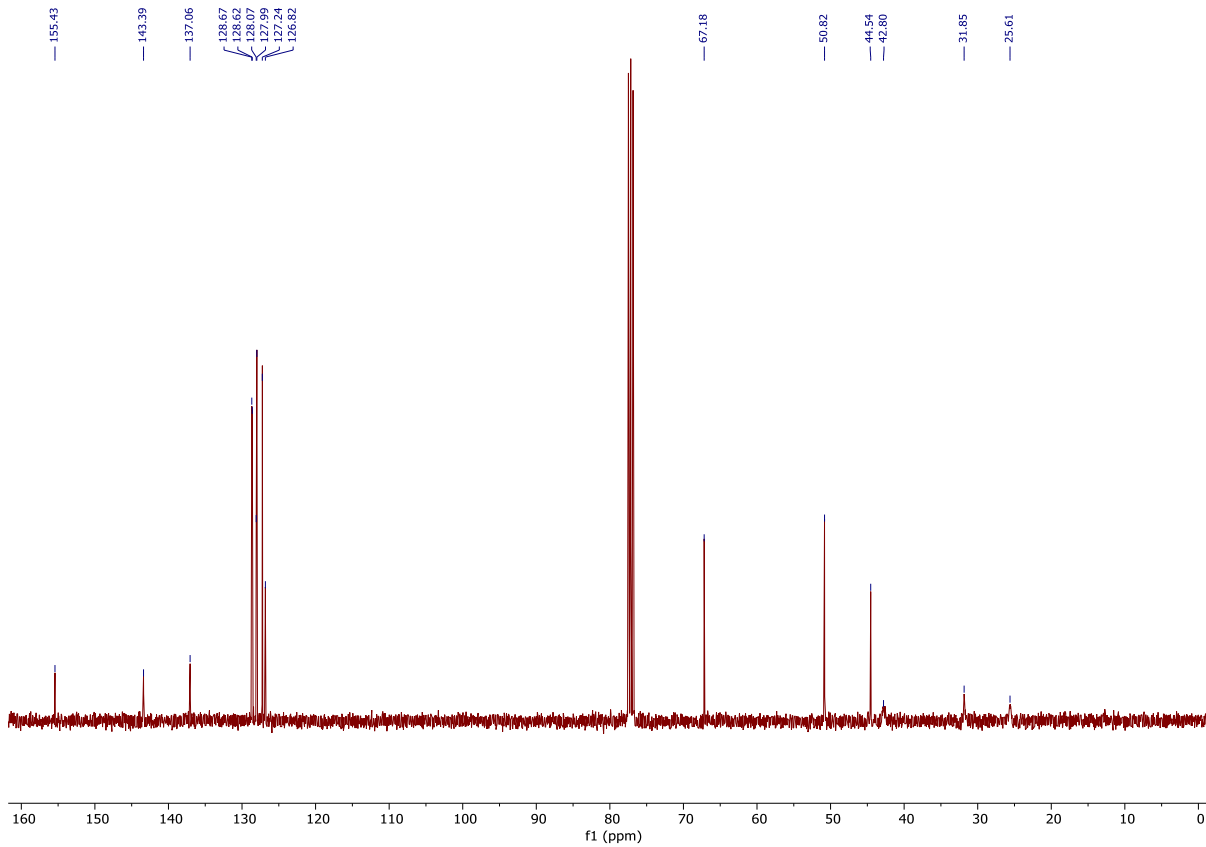

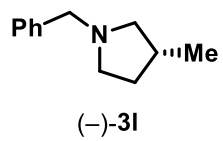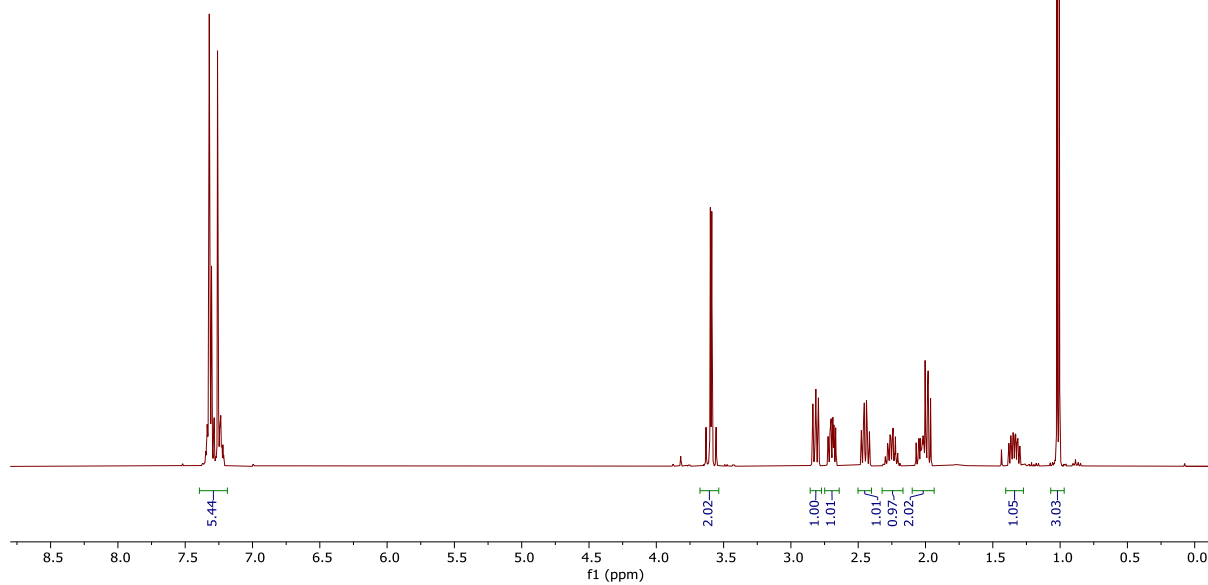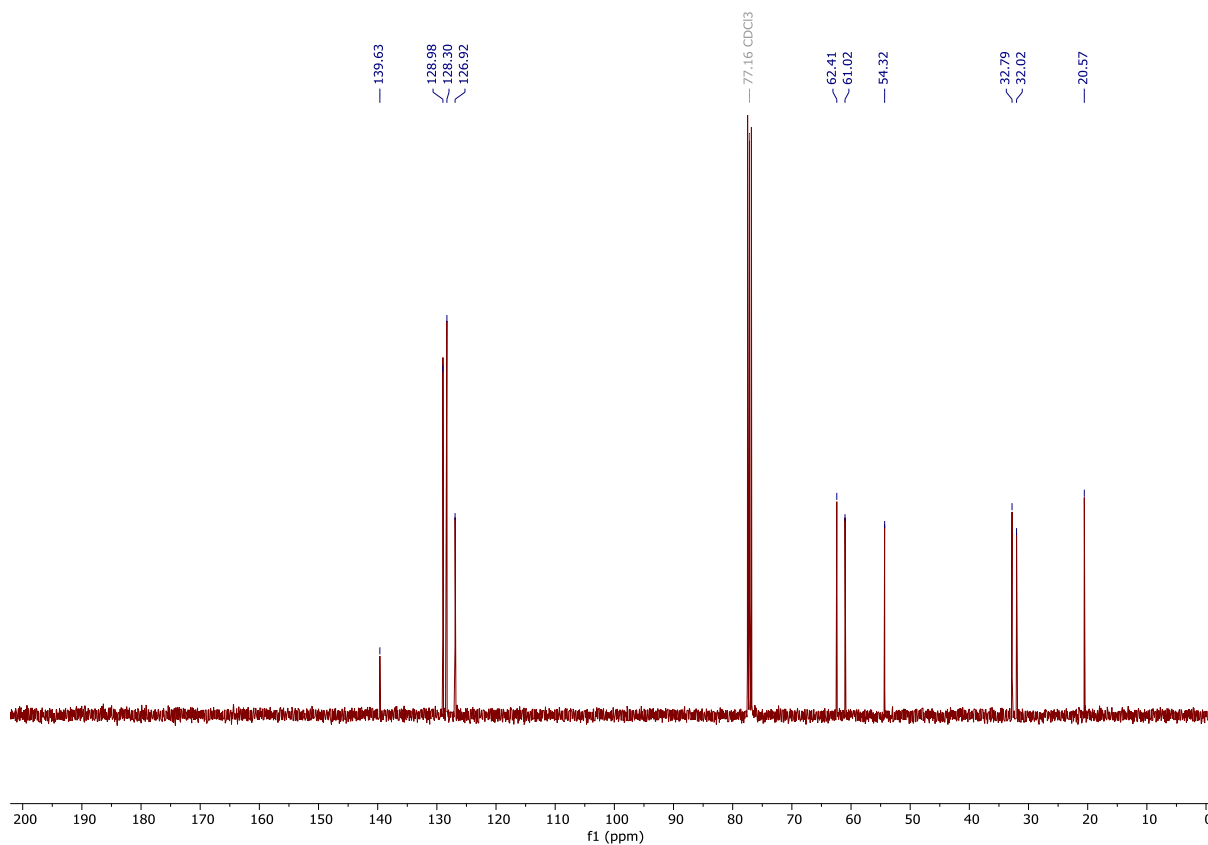

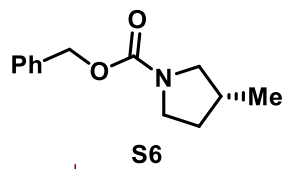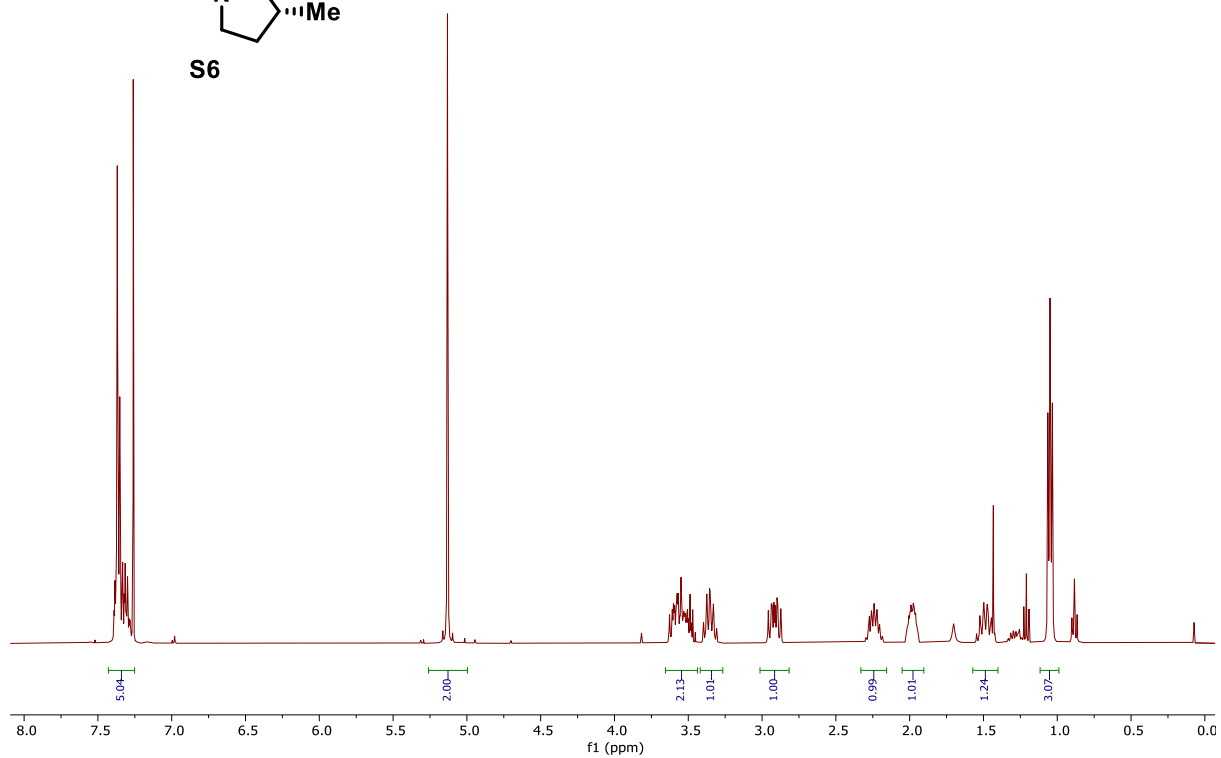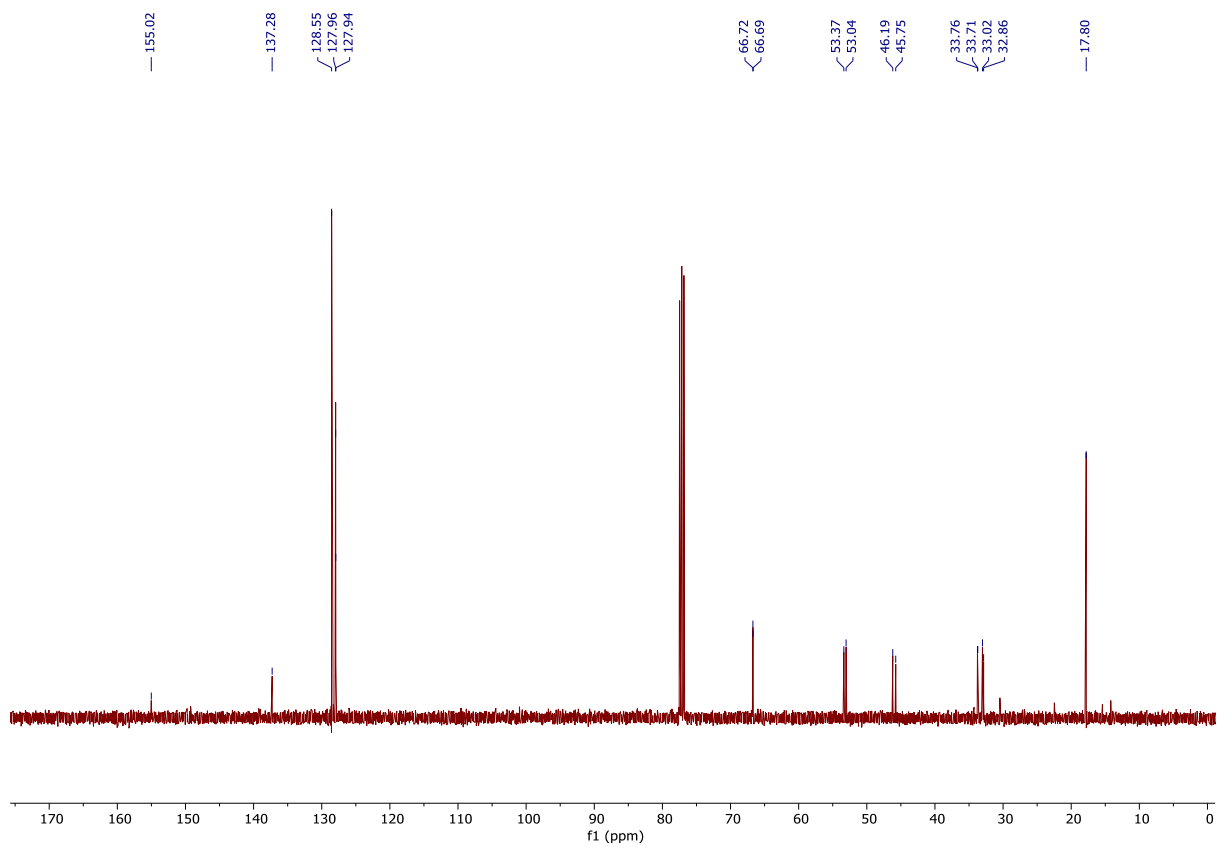

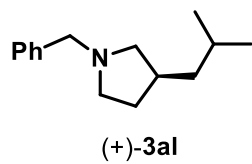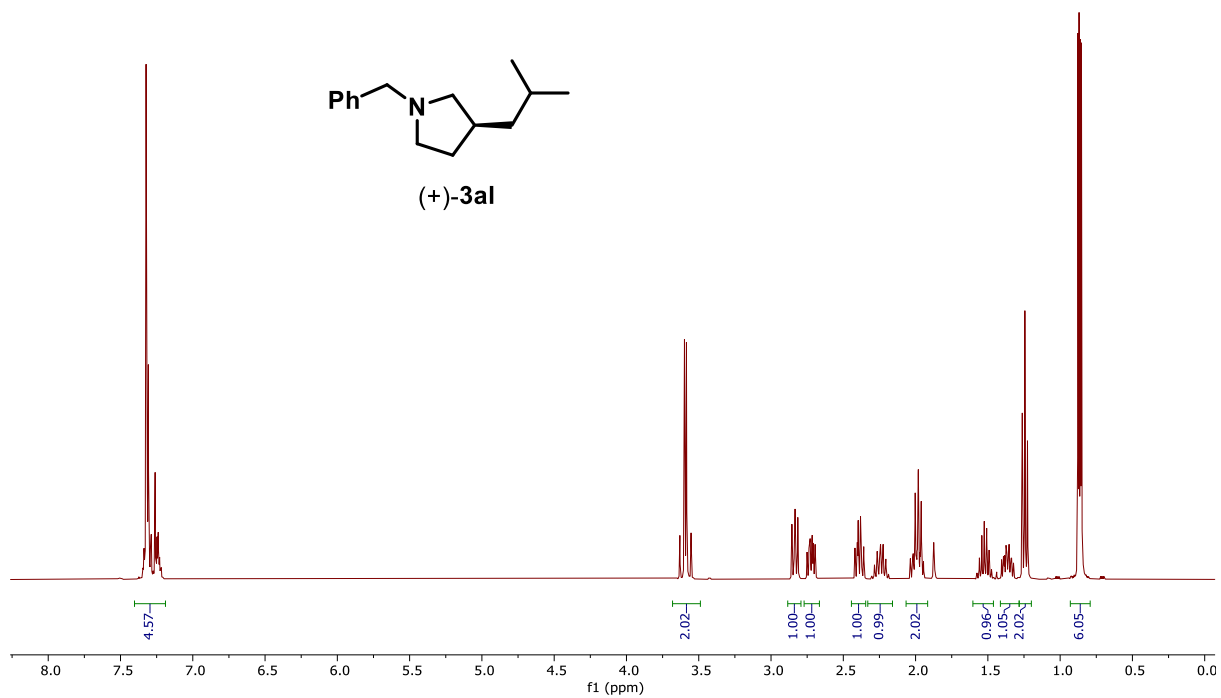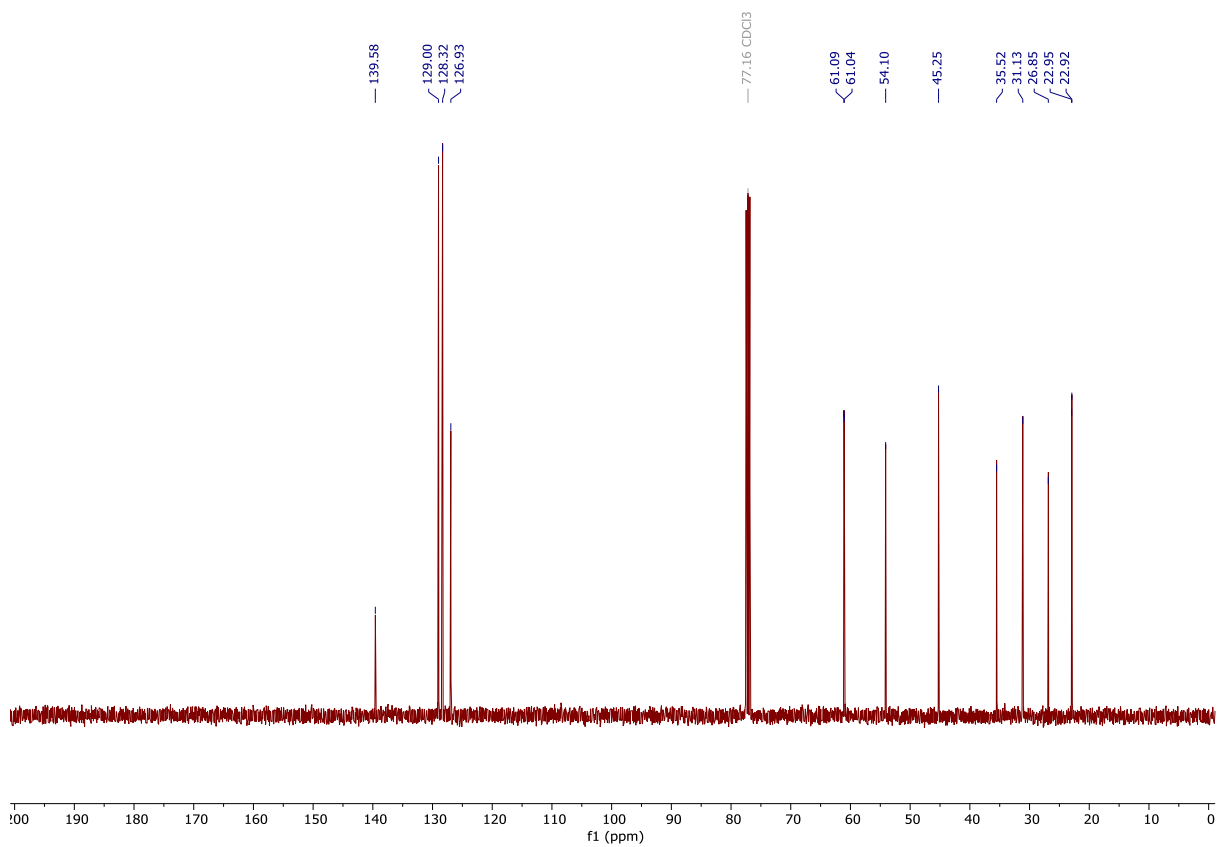

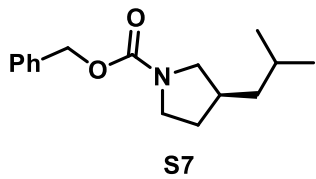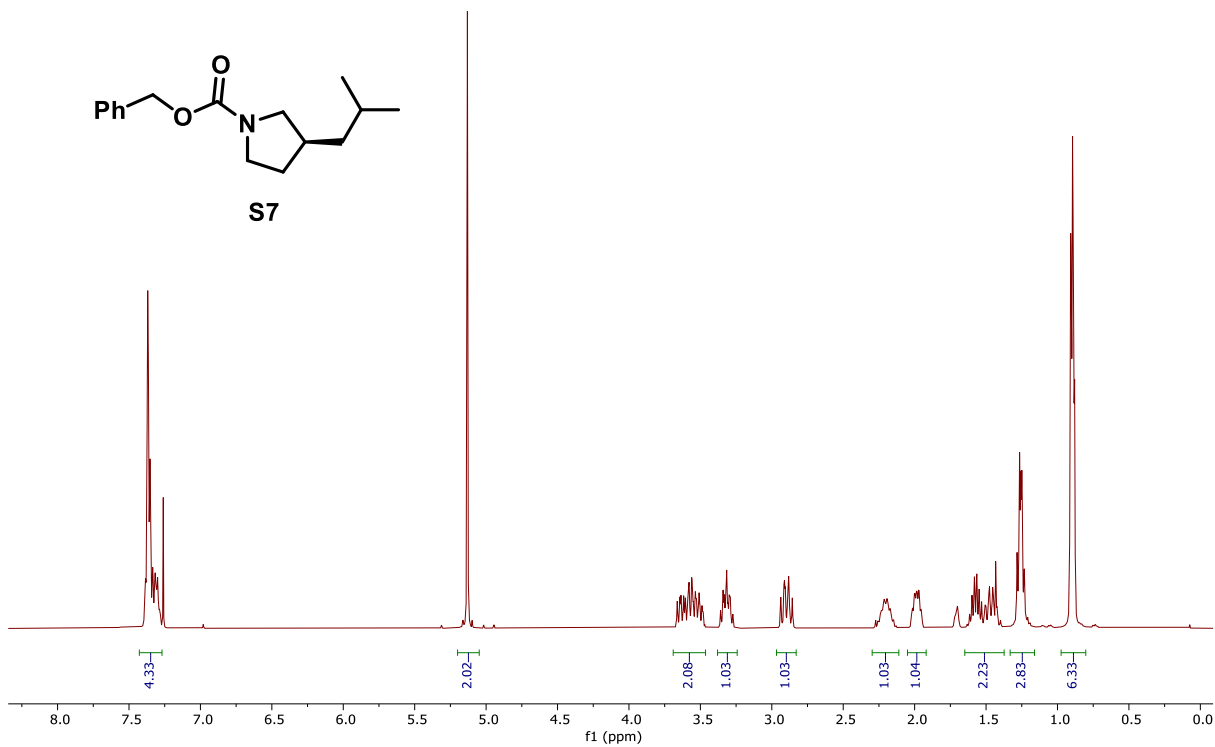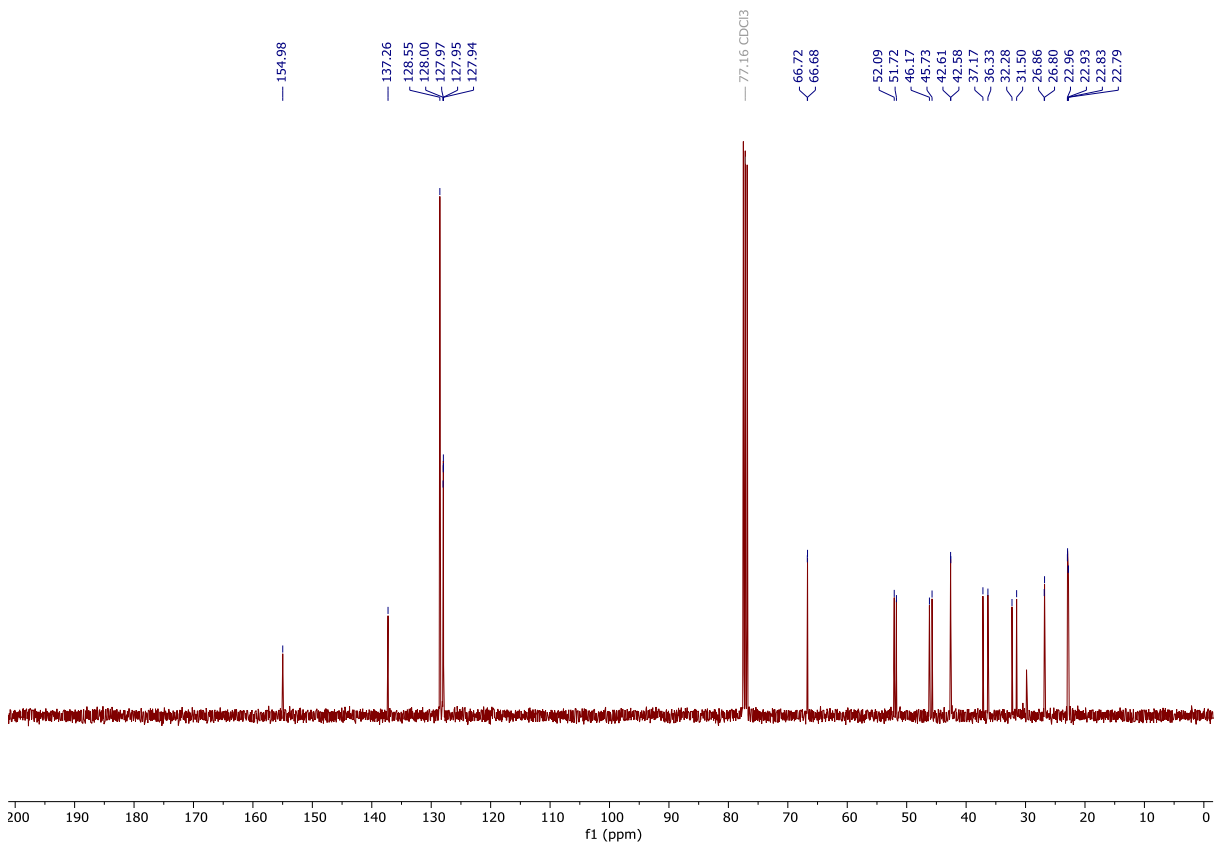

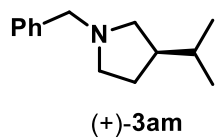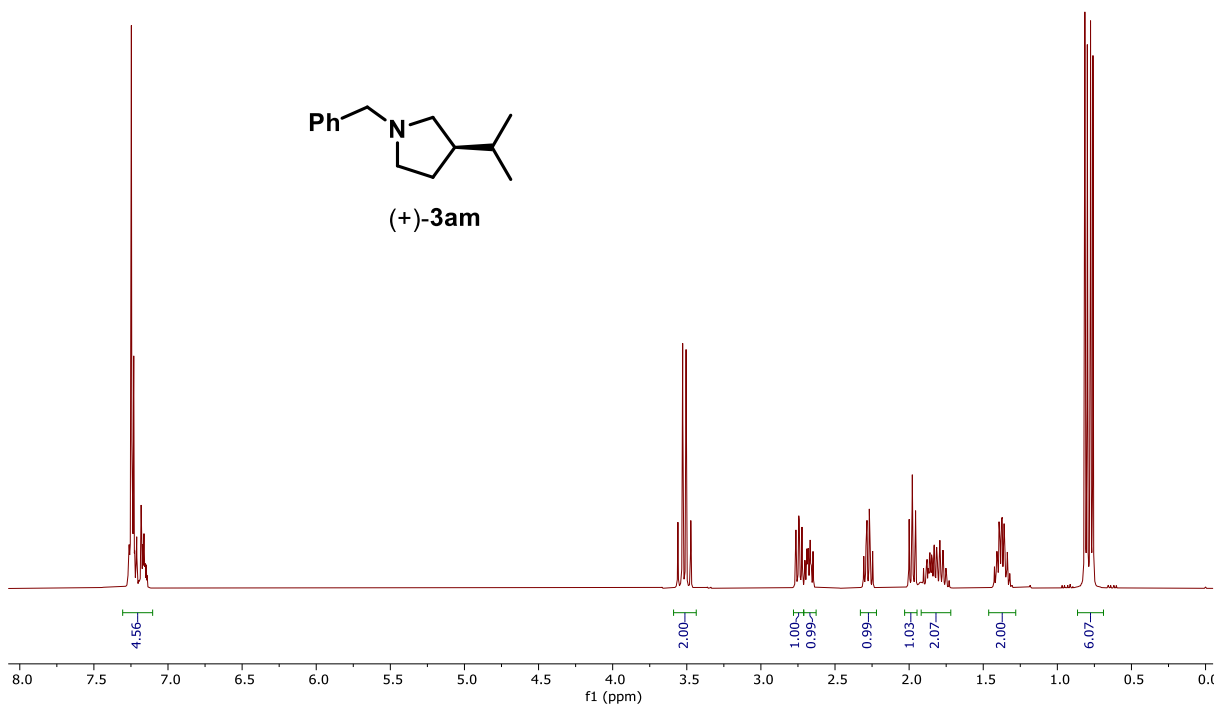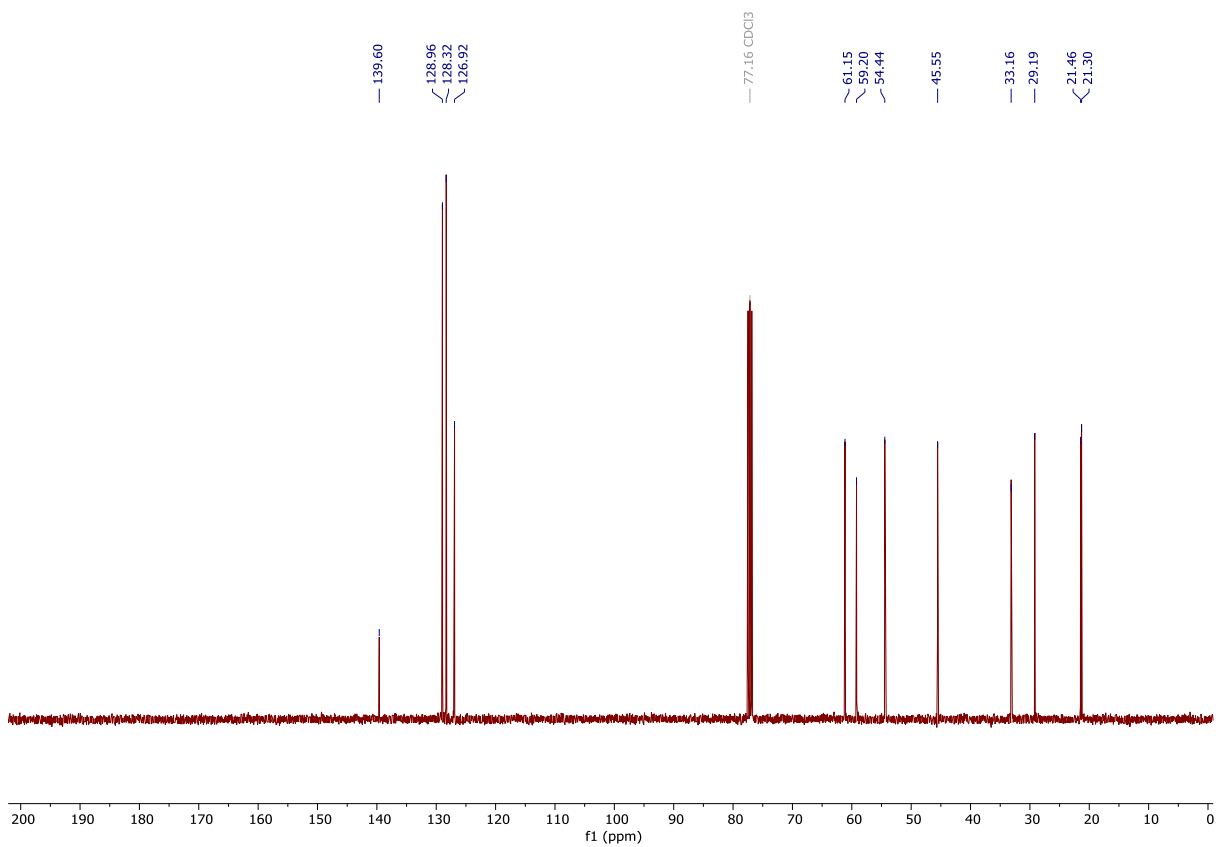



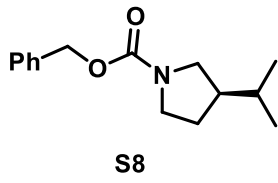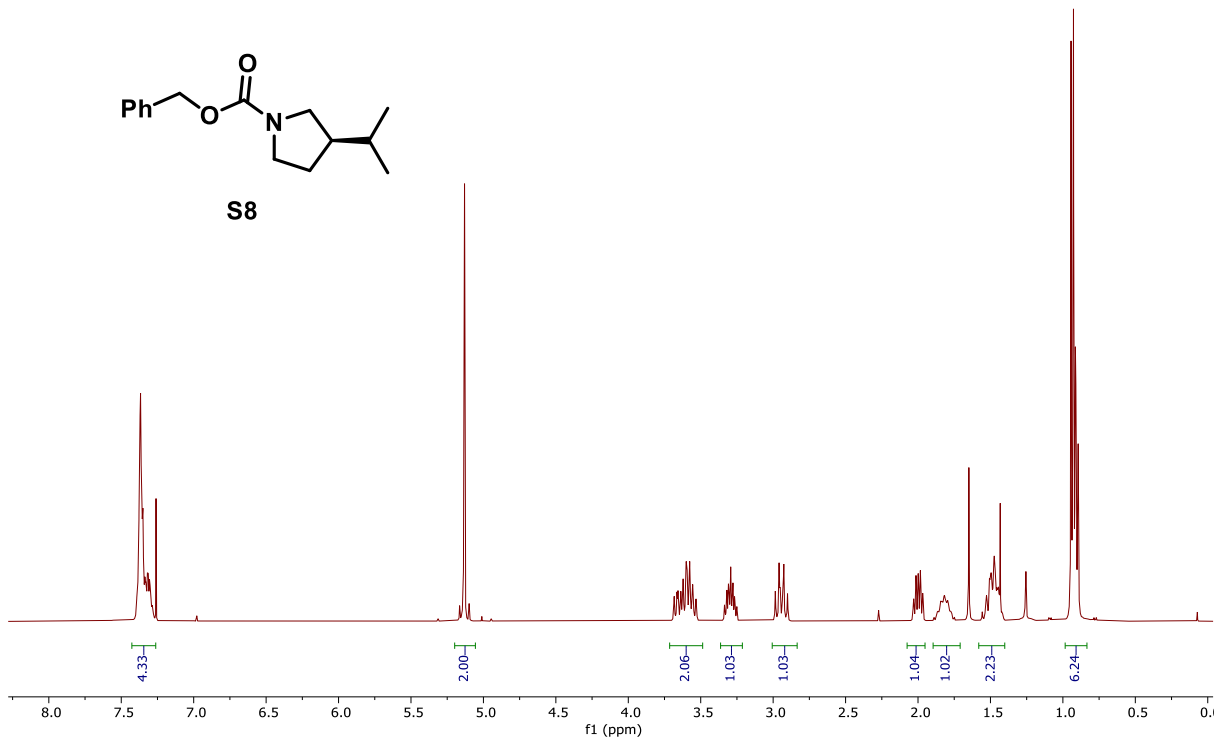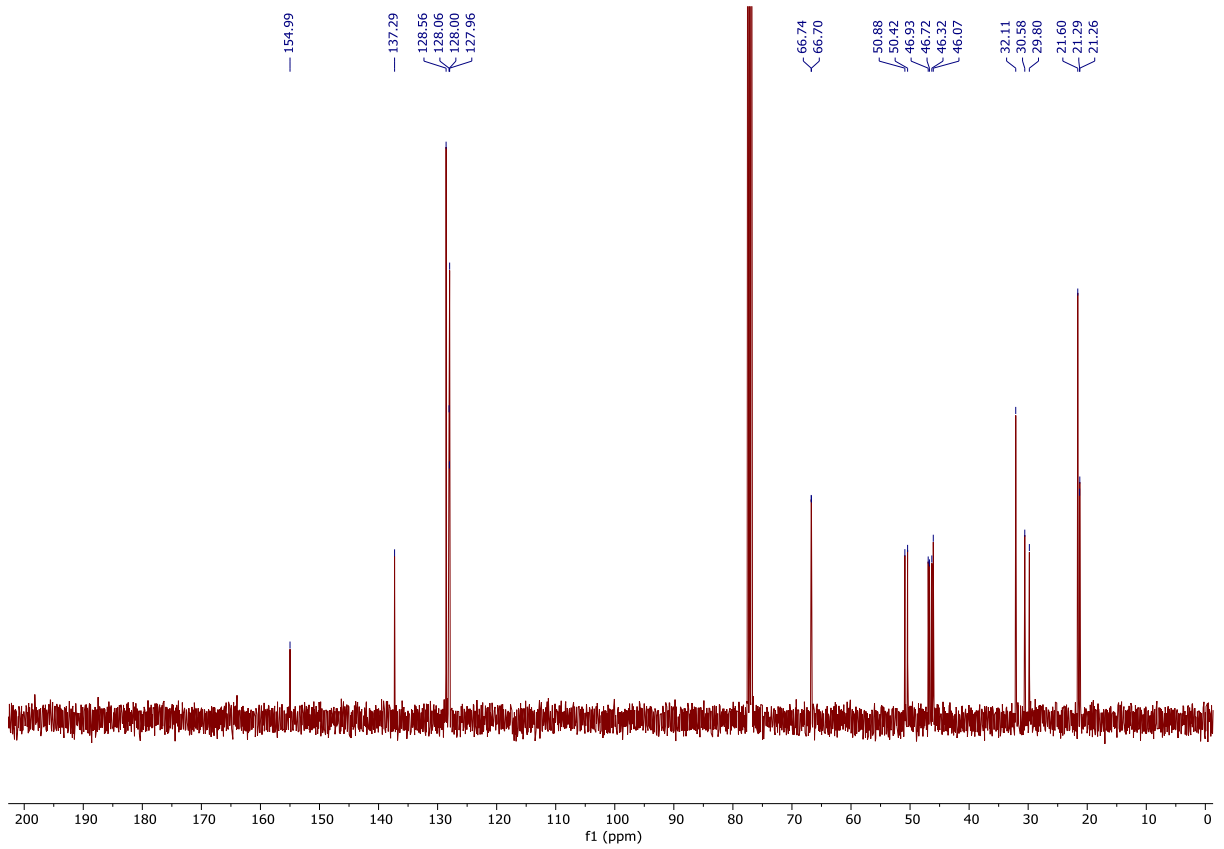

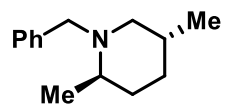

(-)-30<sub>major</sub>

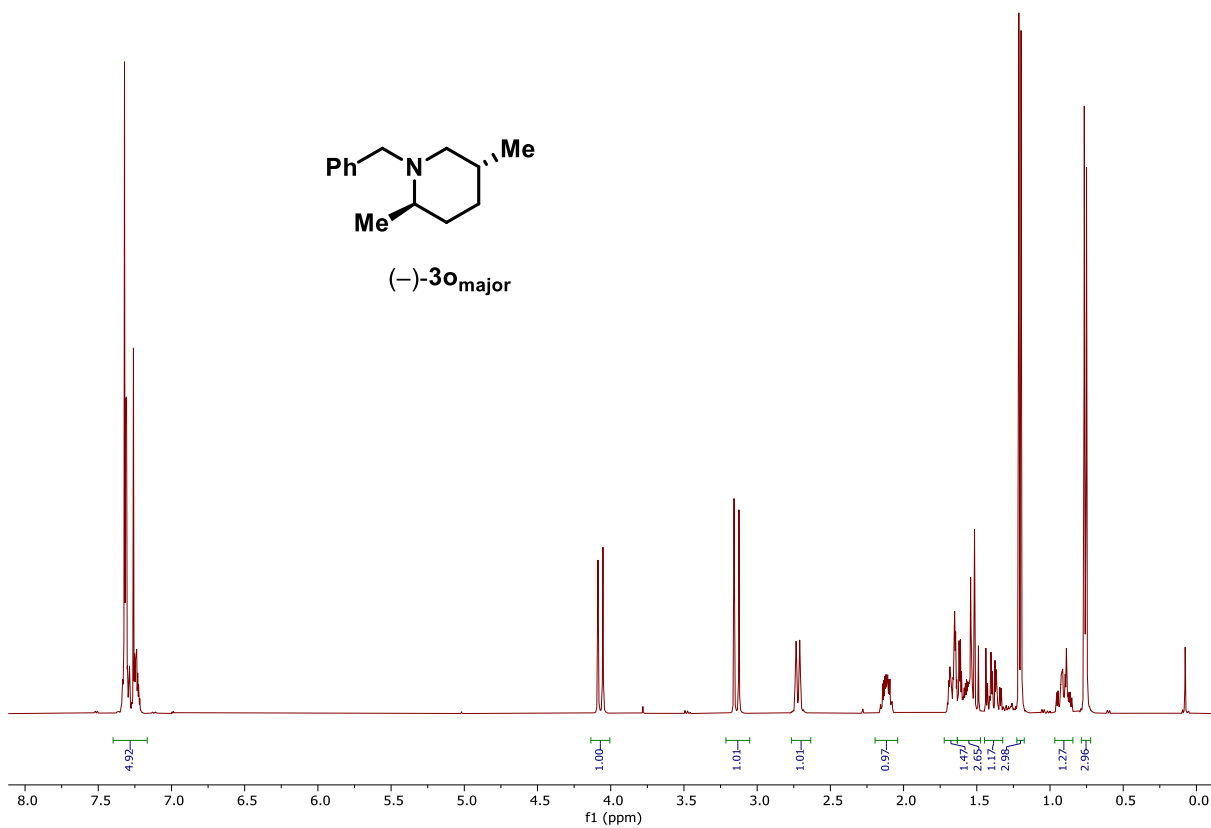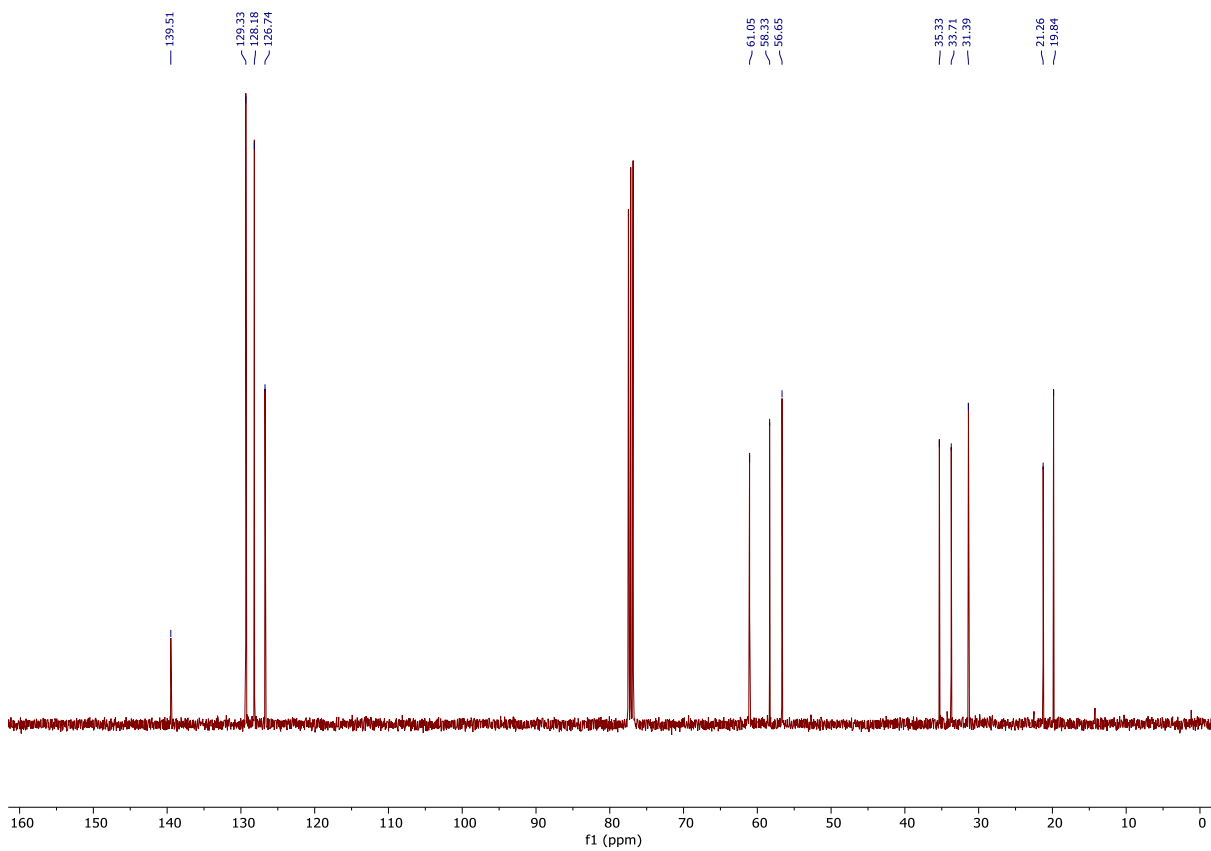

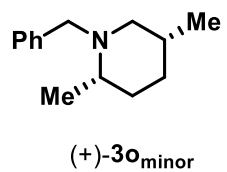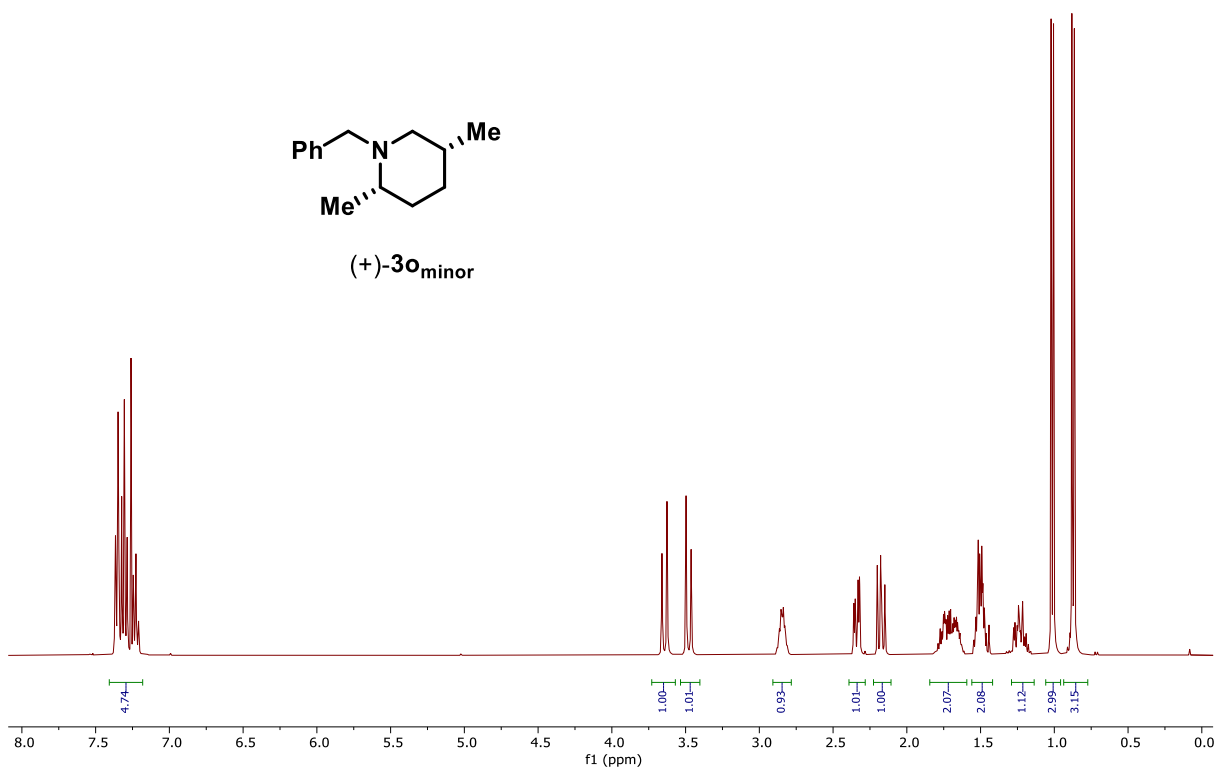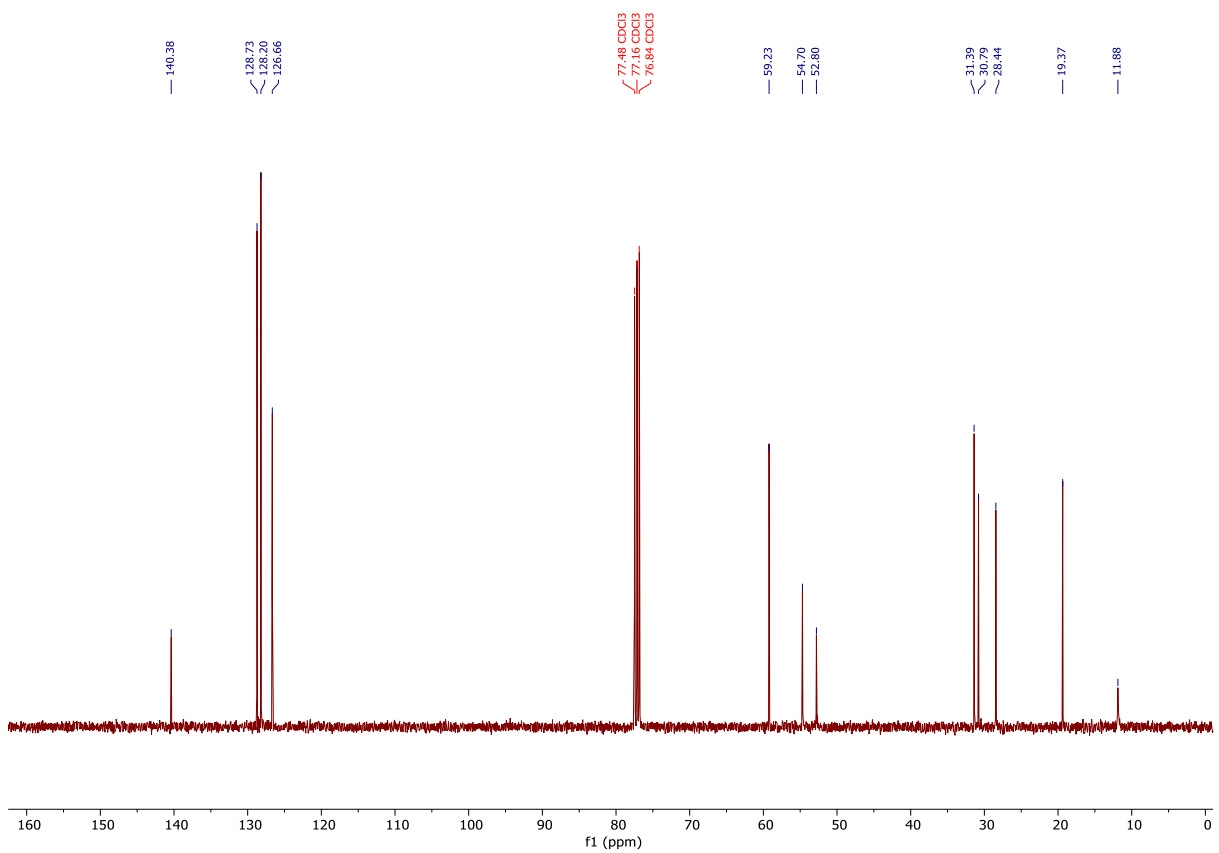

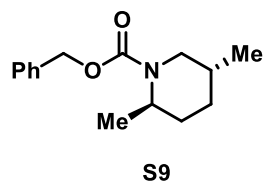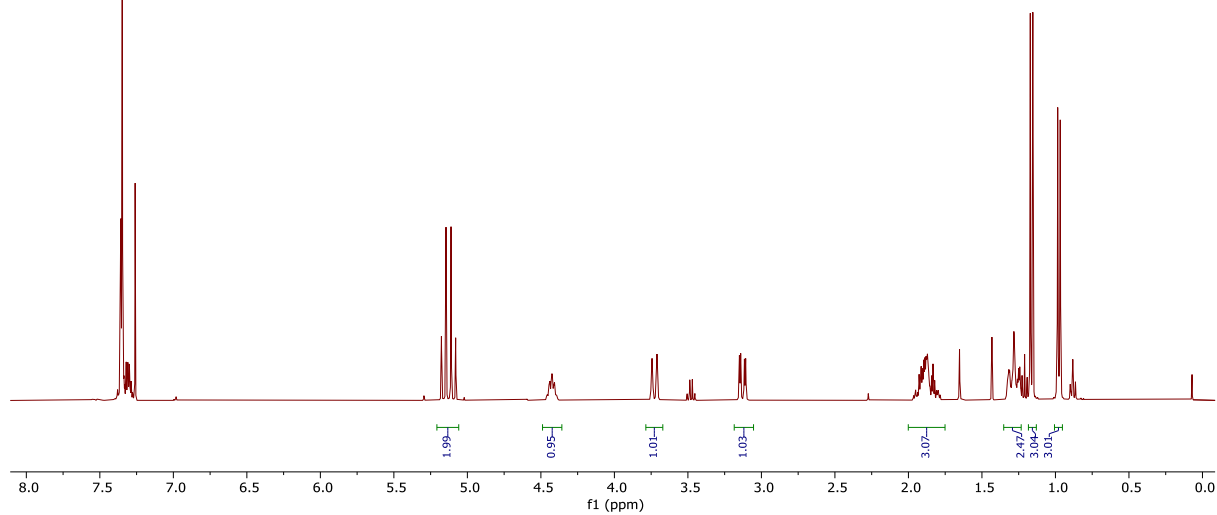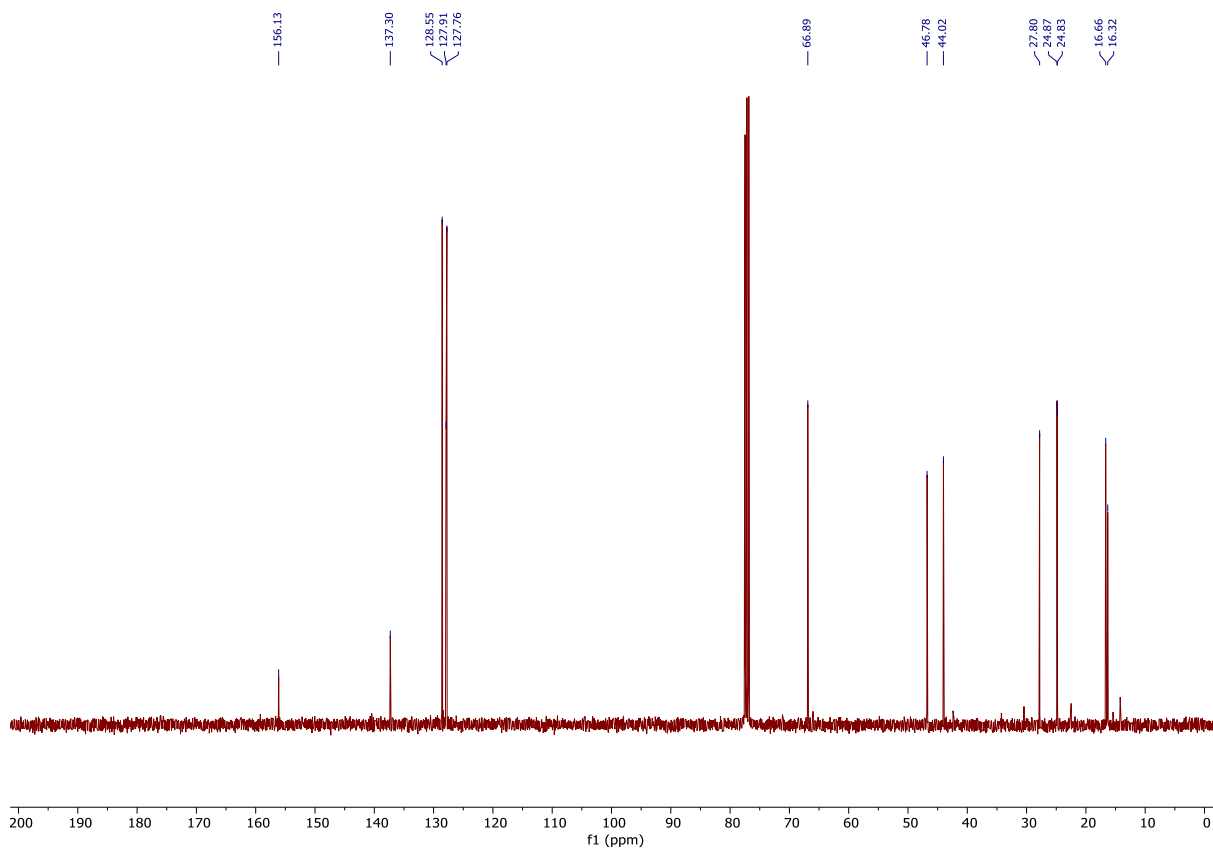

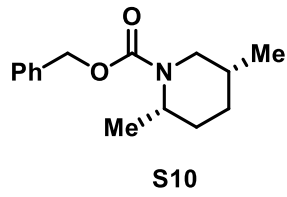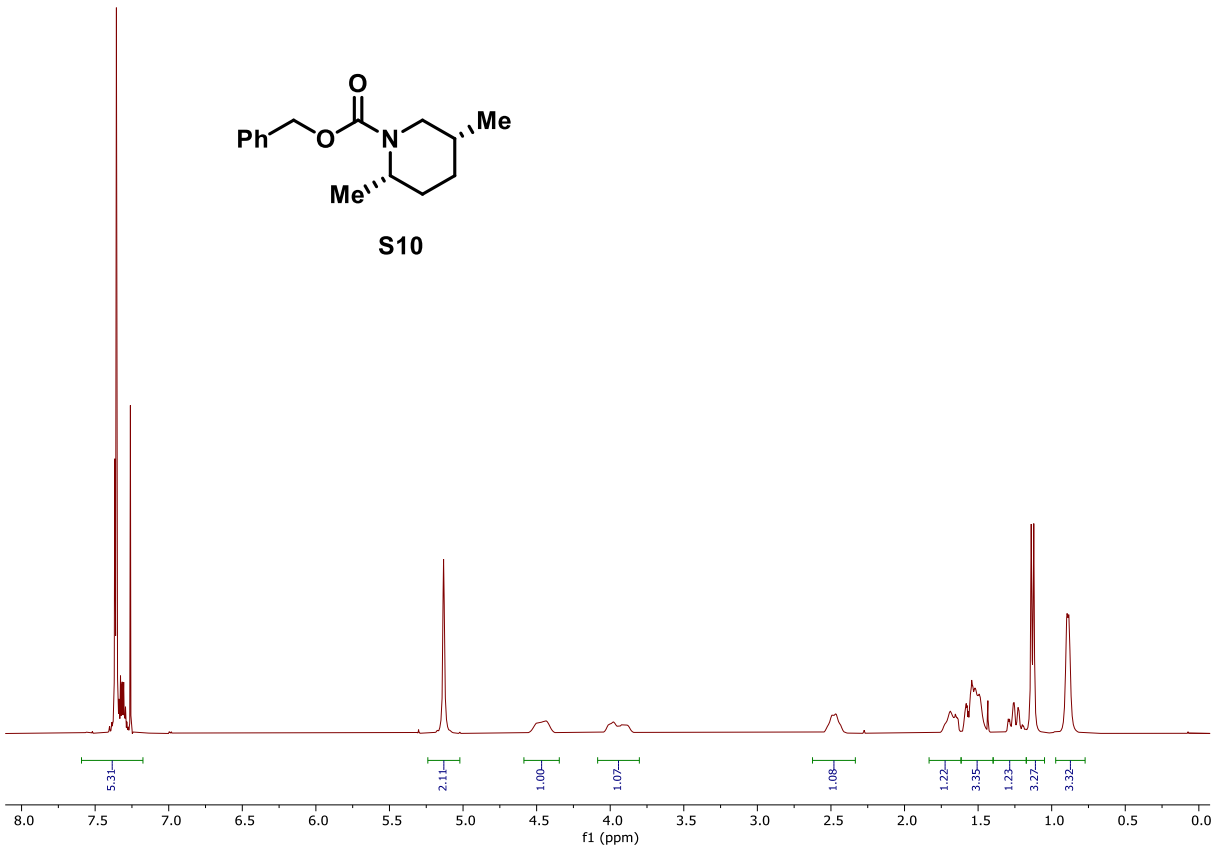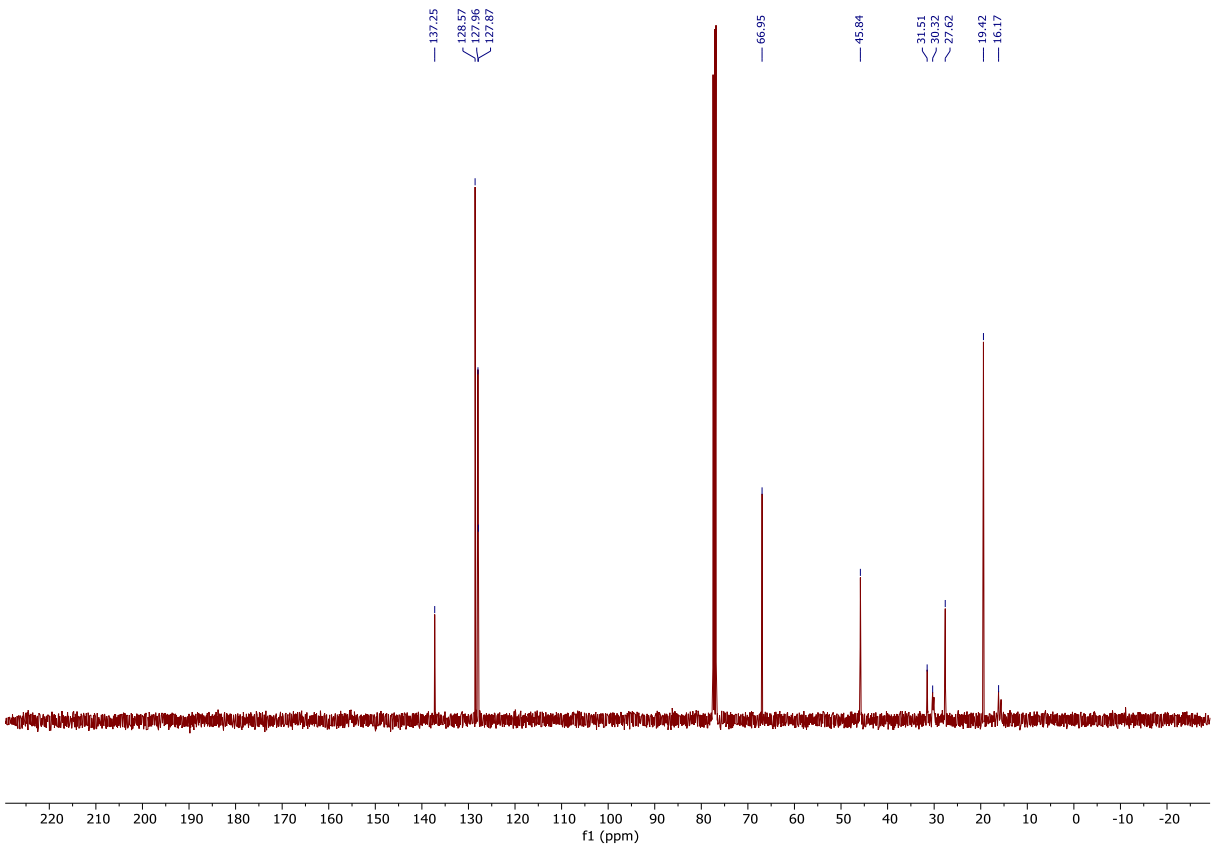

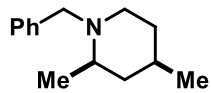

*cis*-**3n** (>95:5 d.r.)  
from resubjection experiment

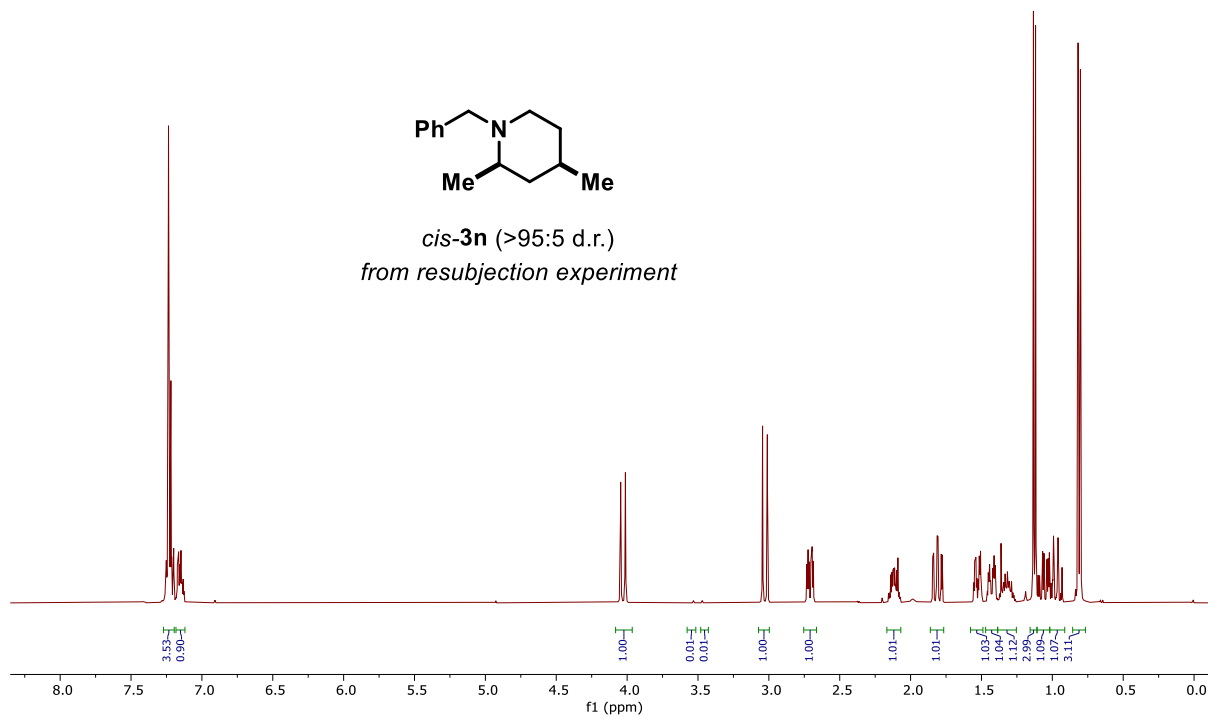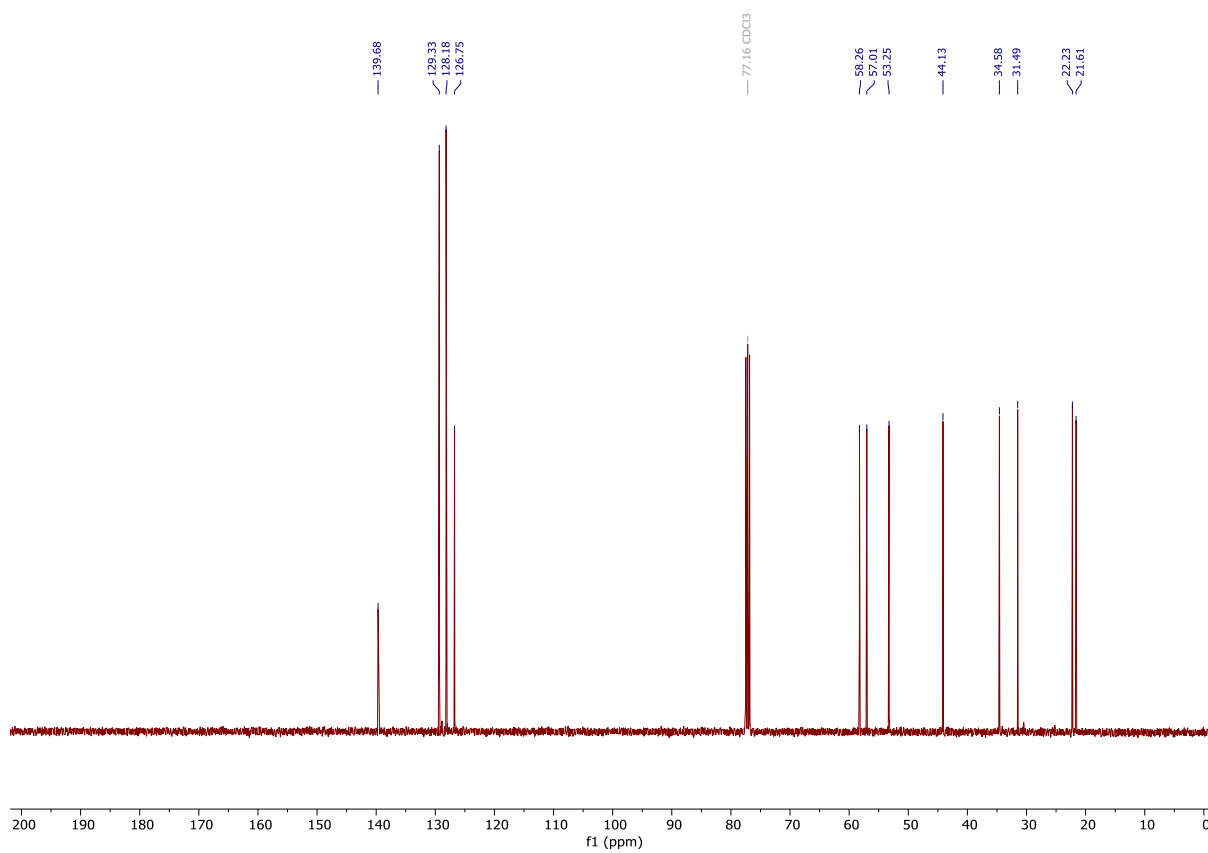

Supplement: d0cc00903b1.pdf [file d0cc00903b1.pdf]
